# Supplementary material for: Removal of sequencing adapter contamination improves microbial genome databases
Source: Research Square preprint supplement (doi:10.21203/rs.3.rs-3888769/v1), 2024-01-23
Supplement: Supplementary file 1 [file d21c2ddbcb2987fa156ceaab.xlsx]

## Sheet: Table S1
Table S1. Results of analyses of adapter enrichment
Assembly File	Expectation	Occurrences	p_value	Average_distance_to_end	Max_distance_to_end	Min_distance_to_end	Average_distance_to_ambiguous_base	Max_distance_to_ambiguous_base	Min_distance_to_ambiguous_base	Source	Occurrences_reverse_complement	p-value_reverse_complement	Average_distance_to_end_reverse_complement	Max_distance_to_end_reverse_complement	Min_distance_to_end_reverse_complement	Average_distance_to_ambiguous_base_reverse_complement	Max_distance_to_ambiguous_base_reverse_complement	Min_distance_to_ambiguous_base_reverse_complement	Total_adapters_including_rc
./Human-Gut/pub/databases/metagenomics/mgnify_genomes/human-gut/v2.0/species_catalogue/MGYG0000034/MGYG000003402/genome/MGYG000003402.fna	0.351831	319	0	11.3417	75	1	18525.9	280839	1032	Human-Gut	486	0	1046.24	1941	27	0	0	NA	805
./Marine/ftp.ebi.ac.uk/pub/databases/metagenomics/mgnify_genomes/marine/v1.0/species_catalogue/MGYG0002963/MGYG000296317/genome/MGYG000296317.fna	0.206677	303	0	156.314	9515	2	11410.8	85233	67	Marine	322	0	338.768	676	2	0	0	NA	625
./Marine/ftp.ebi.ac.uk/pub/databases/metagenomics/mgnify_genomes/marine/v1.0/species_catalogue/MGYG0002970/MGYG000297067/genome/MGYG000297067.fna	0.273507	259	0	361.502	31361	3	17591.6	163099	70	Marine	294	0	280.826	618	3	0	0	NA	553
./Marine/ftp.ebi.ac.uk/pub/databases/metagenomics/mgnify_genomes/marine/v1.0/species_catalogue/MGYG0002963/MGYG000296338/genome/MGYG000296338.fna	0.109627	282	0	31.4858	39	1	6489.9	35019	36	Marine	266	0	204.094	406	3	0	0	NA	548
./Marine/ftp.ebi.ac.uk/pub/databases/metagenomics/mgnify_genomes/marine/v1.0/species_catalogue/MGYG0002965/MGYG000296593/genome/MGYG000296593.fna	0.0915202	258	0	119.039	949	17	5911.83	29488	61	Marine	273	0	174.494	335	2	0	0	NA	531
./Pig-Gut/ftp.ebi.ac.uk/pub/databases/metagenomics/mgnify_genomes/pig-gut/v1.0/species_catalogue/MGYG0003032/MGYG000303258/genome/MGYG000303258.fna	0.162895	218	0	40.8349	1656	1	12421	82750	1656	Pig-Gut	232	0	189.332	384	2	0	0	NA	450
./Pig-Gut/ftp.ebi.ac.uk/pub/databases/metagenomics/mgnify_genomes/pig-gut/v1.0/species_catalogue/MGYG0003032/MGYG000303206/genome/MGYG000303206.fna	0.134831	204	0	33.5098	44	7	11054.9	71175	2514	Pig-Gut	224	0	237.696	481	3	0	0	NA	428
./Pig-Gut/ftp.ebi.ac.uk/pub/databases/metagenomics/mgnify_genomes/pig-gut/v1.0/species_catalogue/MGYG0003031/MGYG000303163/genome/MGYG000303163.fna	0.120202	198	0	111.449	5872	2	10100.2	94840	35	Pig-Gut	196	0	176.428	346	5	0	0	NA	394
./Pig-Gut/ftp.ebi.ac.uk/pub/databases/metagenomics/mgnify_genomes/pig-gut/v1.0/species_catalogue/MGYG0003032/MGYG000303202/genome/MGYG000303202.fna	0.146239	183	0	33.1967	68	1	13018.6	206917	40	Pig-Gut	199	0	221.719	424	7	0	0	NA	382
./Marine/ftp.ebi.ac.uk/pub/databases/metagenomics/mgnify_genomes/marine/v1.0/species_catalogue/MGYG0002962/MGYG000296232/genome/MGYG000296232.fna	0.0896829	180	0	156.85	7886	2	8203.49	41787	69	Marine	164	0	161.126	304	3	0	0	NA	344
./Non-Model-Fish-Gut/ftp.ebi.ac.uk/pub/databases/metagenomics/mgnify_genomes/non-model-fish-gut/v2.0/species_catalogue/MGYG0002996/MGYG000299683/genome/MGYG000299683.fna	0.17081	158	0	38.7025	133	8	17788.6	127728	37	Non-Model-Fish-Gut	177	0	183.215	384	3	0	0	NA	335
./Non-Model-Fish-Gut/ftp.ebi.ac.uk/pub/databases/metagenomics/mgnify_genomes/non-model-fish-gut/v2.0/species_catalogue/MGYG0002995/MGYG000299583/genome/MGYG000299583.fna	0.0991266	158	0	37.4051	291	7	10439.5	48976	36	Non-Model-Fish-Gut	162	0	215.895	446	4	0	0	NA	320
./Pig-Gut/ftp.ebi.ac.uk/pub/databases/metagenomics/mgnify_genomes/pig-gut/v1.0/species_catalogue/MGYG0003032/MGYG000303225/genome/MGYG000303225.fna	0.08028	140	0	31.8714	44	2	9204.91	42116	2570	Pig-Gut	135	0	147.207	292	4	0	0	NA	275
./Human-Gut/pub/databases/metagenomics/mgnify_genomes/human-gut/v2.0/species_catalogue/MGYG0000033/MGYG000003323/genome/MGYG000003323.fna	0.121127	123	0	25.4146	78	5	16661.4	101573	1074	Human-Gut	151	0	466.159	857	16	0	0	NA	274
./Pig-Gut/ftp.ebi.ac.uk/pub/databases/metagenomics/mgnify_genomes/pig-gut/v1.0/species_catalogue/MGYG0003031/MGYG000303190/genome/MGYG000303190.fna	0.133689	133	0	33.1729	51	7	16673	147739	2549	Pig-Gut	138	0	160.406	326	8	0	0	NA	271
./Marine/ftp.ebi.ac.uk/pub/databases/metagenomics/mgnify_genomes/marine/v1.0/species_catalogue/MGYG0002965/MGYG000296541/genome/MGYG000296541.fna	0.108619	137	0	287.161	9570	4	13112.7	89144	68	Marine	128	0	114.952	240	2	0	0	NA	265
./Human-Gut/pub/databases/metagenomics/mgnify_genomes/human-gut/v2.0/species_catalogue/MGYG0000015/MGYG000001570/genome/MGYG000001570.fna	0.0955746	115	0	11.2261	40	1	13695.2	64792	1516	Human-Gut	146	0	225.945	469	2	0	0	NA	261
./Human-Gut/pub/databases/metagenomics/mgnify_genomes/human-gut/v2.0/species_catalogue/MGYG0000017/MGYG000001761/genome/MGYG000001761.fna	0.148397	108	0	10.2778	28	1	22791.9	191958	1794	Human-Gut	153	0	254.81	493	3	0	0	NA	261
./Marine/ftp.ebi.ac.uk/pub/databases/metagenomics/mgnify_genomes/marine/v1.0/species_catalogue/MGYG0002967/MGYG000296700/genome/MGYG000296700.fna	0.0777741	119	0	245.815	6597	2	10466.1	61311	411	Marine	135	0	118.181	226	4	0	0	NA	254
./Marine/ftp.ebi.ac.uk/pub/databases/metagenomics/mgnify_genomes/marine/v1.0/species_catalogue/MGYG0002968/MGYG000296823/genome/MGYG000296823.fna	0.213581	125	0	95.992	191	6	27737.7	144683	77	Marine	127	0	132.574	264	5	0	0	NA	252
./Mouse-Gut/ftp.ebi.ac.uk/pub/databases/metagenomics/mgnify_genomes/mouse-gut/v1.0/species_catalogue/MGYG0003237/MGYG000323782/genome/MGYG000323782.fna	0.1454	111	0	30.2252	59	1	21503.4	122661	2525	Mouse-Gut	138	0	189	368	10	0	0	NA	249
./Marine/ftp.ebi.ac.uk/pub/databases/metagenomics/mgnify_genomes/marine/v1.0/species_catalogue/MGYG0002971/MGYG000297154/genome/MGYG000297154.fna	0.110684	119	0	110.353	240	1	15266.7	100968	49	Marine	121	0	78.4874	156	2	0	0	NA	240
./Mouse-Gut/ftp.ebi.ac.uk/pub/databases/metagenomics/mgnify_genomes/mouse-gut/v1.0/species_catalogue/MGYG0003271/MGYG000327115/genome/MGYG000327115.fna	0.0865584	108	0	35.787	97	1	13155.3	83115	2511	Mouse-Gut	132	0	159.515	328	2	0	0	NA	240
./Human-Gut/pub/databases/metagenomics/mgnify_genomes/human-gut/v2.0/species_catalogue/MGYG0000030/MGYG000003016/genome/MGYG000003016.fna	0.234944	108	0	407.648	19724	15	35192.1	204720	72	Human-Gut	127	0	128.561	260	6	0	0	NA	235
./Human-Gut/pub/databases/metagenomics/mgnify_genomes/human-gut/v2.0/species_catalogue/MGYG0000005/MGYG000000541/genome/MGYG000000541.fna	0.137533	98	0	9.96939	30	1	22870	174843	1797	Human-Gut	136	0	219.493	439	9	0	0	NA	234
./Mouse-Gut/ftp.ebi.ac.uk/pub/databases/metagenomics/mgnify_genomes/mouse-gut/v1.0/species_catalogue/MGYG0003604/MGYG000360433/genome/MGYG000360433.fna	0.192281	112	0	230.098	6669	1	12978	76248	16	Mouse-Gut	116	0	197.673	402	4	176.32	319	4	228
./Pig-Gut/ftp.ebi.ac.uk/pub/databases/metagenomics/mgnify_genomes/pig-gut/v1.0/species_catalogue/MGYG0003033/MGYG000303357/genome/MGYG000303357.fna	0.137568	115	0	29.2783	43	2	19052.8	99342	15	Pig-Gut	112	0	125.473	251	2	0	0	NA	227
./Pig-Gut/ftp.ebi.ac.uk/pub/databases/metagenomics/mgnify_genomes/pig-gut/v1.0/species_catalogue/MGYG0003033/MGYG000303347/genome/MGYG000303347.fna	0.111782	106	0	33.4057	59	11	17502.5	96548	2691	Pig-Gut	121	0	132.215	266	6	0	0	NA	227
./Pig-Gut/ftp.ebi.ac.uk/pub/databases/metagenomics/mgnify_genomes/pig-gut/v1.0/species_catalogue/MGYG0003032/MGYG000303256/genome/MGYG000303256.fna	0.118506	101	0	31.5743	43	3	18737	221593	27	Pig-Gut	121	0	101.934	204	2	0	0	NA	222
./Human-Gut/pub/databases/metagenomics/mgnify_genomes/human-gut/v2.0/species_catalogue/MGYG0000048/MGYG000004857/genome/MGYG000004857.fna	0.0849164	110	0	26.0545	44	1	12811.4	149838	1102	Human-Gut	104	0	335.865	727	3	0	0	NA	214
./Human-Gut/pub/databases/metagenomics/mgnify_genomes/human-gut/v2.0/species_catalogue/MGYG0000033/MGYG000003389/genome/MGYG000003389.fna	0.230111	112	0	7.27679	27	1	34661.2	267085	1014	Human-Gut	100	0	844.82	1555	26	0	0	NA	212
./Pig-Gut/ftp.ebi.ac.uk/pub/databases/metagenomics/mgnify_genomes/pig-gut/v1.0/species_catalogue/MGYG0003032/MGYG000303249/genome/MGYG000303249.fna	0.126897	106	0	32.9057	43	3	19673.4	154909	2750	Pig-Gut	106	0	144.047	286	2	0	0	NA	212
./Marine/ftp.ebi.ac.uk/pub/databases/metagenomics/mgnify_genomes/marine/v1.0/species_catalogue/MGYG0002972/MGYG000297299/genome/MGYG000297299.fna	0.147269	104	0	90.5096	244	1	21698.8	141146	74	Marine	108	0	152.15	315	5	0	0	NA	212
./Human-Gut/pub/databases/metagenomics/mgnify_genomes/human-gut/v2.0/species_catalogue/MGYG0000033/MGYG000003321/genome/MGYG000003321.fna	0.0484714	88	0	18.5568	94	5	9302.83	58306	1007	Human-Gut	124	0	134.863	259	4	0	0	NA	212
./Human-Gut/pub/databases/metagenomics/mgnify_genomes/human-gut/v2.0/species_catalogue/MGYG0000021/MGYG000002130/genome/MGYG000002130.fna	0.114932	107	0	2184.18	17036	3	17822.9	113671	96	Human-Gut	104	0	111.706	273	2	0	0	NA	211
./Marine/ftp.ebi.ac.uk/pub/databases/metagenomics/mgnify_genomes/marine/v1.0/species_catalogue/MGYG0002972/MGYG000297291/genome/MGYG000297291.fna	0.21185	103	0	105.563	248	1	33607.2	442338	65	Marine	105	0	95.2913	211	2	0	0	NA	208
./Pig-Gut/ftp.ebi.ac.uk/pub/databases/metagenomics/mgnify_genomes/pig-gut/v1.0/species_catalogue/MGYG0003033/MGYG000303321/genome/MGYG000303321.fna	0.0905154	87	0	31.6207	87	1	17273	119366	23	Pig-Gut	121	0	147.521	306	2	0	0	NA	208
./Marine/ftp.ebi.ac.uk/pub/databases/metagenomics/mgnify_genomes/marine/v1.0/species_catalogue/MGYG0002964/MGYG000296400/genome/MGYG000296400.fna	0.204146	105	0	111.286	2624	14	31366.2	406027	67	Marine	97	0	125.263	256	5	0	0	NA	202
./Human-Gut/pub/databases/metagenomics/mgnify_genomes/human-gut/v2.0/species_catalogue/MGYG0000029/MGYG000002931/genome/MGYG000002931.fna	0.0456356	97	0	23.6289	39	2	7784.47	48091	3	Human-Gut	105	0	123.171	238	2	0	0	NA	202
./Mouse-Gut/ftp.ebi.ac.uk/pub/databases/metagenomics/mgnify_genomes/mouse-gut/v1.0/species_catalogue/MGYG0003469/MGYG000346909/genome/MGYG000346909.fna	0.145321	102	0	116.255	3324	1	9516.76	37088	0	Mouse-Gut	98	0	342.351	824	2	209.068	403	16	200
./Pig-Gut/ftp.ebi.ac.uk/pub/databases/metagenomics/mgnify_genomes/pig-gut/v1.0/species_catalogue/MGYG0003031/MGYG000303169/genome/MGYG000303169.fna	0.0700255	90	0	32.6778	41	4	12730.5	71692	2593	Pig-Gut	106	0	119.066	244	5	0	0	NA	196
./Mouse-Gut/ftp.ebi.ac.uk/pub/databases/metagenomics/mgnify_genomes/mouse-gut/v1.0/species_catalogue/MGYG0003275/MGYG000327529/genome/MGYG000327529.fna	0.224104	94	0	43.9468	668	1	38345.4	166200	13	Mouse-Gut	101	0	159.099	327	4	0	0	NA	195
./Pig-Gut/ftp.ebi.ac.uk/pub/databases/metagenomics/mgnify_genomes/pig-gut/v1.0/species_catalogue/MGYG0003033/MGYG000303339/genome/MGYG000303339.fna	0.145756	96	0	51.1458	1809	1	24610.4	320134	2039	Pig-Gut	94	0	148.543	279	2	0	0	NA	190
./Non-Model-Fish-Gut/ftp.ebi.ac.uk/pub/databases/metagenomics/mgnify_genomes/non-model-fish-gut/v2.0/species_catalogue/MGYG0002996/MGYG000299687/genome/MGYG000299687.fna	0.130678	89	0	47.6966	187	5	23759.9	128356	2626	Non-Model-Fish-Gut	101	0	192.446	391	3	0	0	NA	190
./Human-Gut/pub/databases/metagenomics/mgnify_genomes/human-gut/v2.0/species_catalogue/MGYG0000033/MGYG000003381/genome/MGYG000003381.fna	0.158487	84	0	21.1071	173	2	31670.3	158821	1858	Human-Gut	101	0	141.644	263	4	0	0	NA	185
./Human-Gut/pub/databases/metagenomics/mgnify_genomes/human-gut/v2.0/species_catalogue/MGYG0000005/MGYG000000536/genome/MGYG000000536.fna	0.138417	79	0	10.2278	32	1	26793.1	264771	13	Human-Gut	103	0	185.34	359	5	0	0	NA	182
./Mouse-Gut/ftp.ebi.ac.uk/pub/databases/metagenomics/mgnify_genomes/mouse-gut/v1.0/species_catalogue/MGYG0003240/MGYG000324072/genome/MGYG000324072.fna	0.0734962	89	0	31.3034	39	3	12255	92565	33	Mouse-Gut	90	0	88.9667	184	5	0	0	NA	179
./Human-Gut/pub/databases/metagenomics/mgnify_genomes/human-gut/v2.0/species_catalogue/MGYG0000036/MGYG000003639/genome/MGYG000003639.fna	0.130875	69	0	7.46377	24	1	32183.2	143596	1291	Human-Gut	107	0	505.972	983	21	0	0	NA	176
./Human-Gut/pub/databases/metagenomics/mgnify_genomes/human-gut/v2.0/species_catalogue/MGYG0000004/MGYG000000497/genome/MGYG000000497.fna	0.0685865	72	0	10.0417	33	1	15175	71563	1674	Human-Gut	103	0	233.398	444	5	0	0	NA	175
./Non-Model-Fish-Gut/ftp.ebi.ac.uk/pub/databases/metagenomics/mgnify_genomes/non-model-fish-gut/v2.0/species_catalogue/MGYG0002996/MGYG000299686/genome/MGYG000299686.fna	0.148783	101	0	201.554	9893	2	23986.2	96189	3023	Non-Model-Fish-Gut	73	0	210.411	426	9	0	0	NA	174
./Mouse-Gut/ftp.ebi.ac.uk/pub/databases/metagenomics/mgnify_genomes/mouse-gut/v1.0/species_catalogue/MGYG0003228/MGYG000322832/genome/MGYG000322832.fna	0.246734	78	0	489.09	12956	2	22851	111887	1	Mouse-Gut	96	0	234.936	460	6	206.444	307	4	174
./Human-Gut/pub/databases/metagenomics/mgnify_genomes/human-gut/v2.0/species_catalogue/MGYG0000035/MGYG000003578/genome/MGYG000003578.fna	0.206723	76	0	9.52632	22	1	44740.2	189337	1484	Human-Gut	98	0	503.571	922	19	0	0	NA	174
./Mouse-Gut/ftp.ebi.ac.uk/pub/databases/metagenomics/mgnify_genomes/mouse-gut/v1.0/species_catalogue/MGYG0003282/MGYG000328211/genome/MGYG000328211.fna	0.26179	82	0	32.5244	56	3	46322.1	361113	2572	Mouse-Gut	88	0	374.443	640	53	0	0	NA	170
./Human-Gut/pub/databases/metagenomics/mgnify_genomes/human-gut/v2.0/species_catalogue/MGYG0000034/MGYG000003431/genome/MGYG000003431.fna	0.149178	76	0	8.51316	21	1	33216.9	148947	1259	Human-Gut	93	0	455.323	884	15	0	0	NA	169
./Human-Gut/pub/databases/metagenomics/mgnify_genomes/human-gut/v2.0/species_catalogue/MGYG0000027/MGYG000002785/genome/MGYG000002785.fna	0.105935	65	0	28.6	1312	1	27038.2	134166	2004	Human-Gut	101	0	210.119	448	4	0	0	NA	166
./Pig-Gut/ftp.ebi.ac.uk/pub/databases/metagenomics/mgnify_genomes/pig-gut/v1.0/species_catalogue/MGYG0003032/MGYG000303246/genome/MGYG000303246.fna	0.117104	84	0	98.2381	5462	6	22259.8	166428	37	Pig-Gut	77	0	94.4935	187	6	0	0	NA	161
./Pig-Gut/ftp.ebi.ac.uk/pub/databases/metagenomics/mgnify_genomes/pig-gut/v1.0/species_catalogue/MGYG0003031/MGYG000303197/genome/MGYG000303197.fna	0.0574461	82	0	84.6829	4308	1	11504.7	63678	57	Pig-Gut	78	0	101.551	222	2	0	0	NA	160
./Human-Gut/pub/databases/metagenomics/mgnify_genomes/human-gut/v2.0/species_catalogue/MGYG0000005/MGYG000000554/genome/MGYG000000554.fna	0.0915229	81	0	34.6296	167	1	16981.4	119310	1534	Human-Gut	79	0	134.063	269	3	0	0	NA	160
./Non-Model-Fish-Gut/ftp.ebi.ac.uk/pub/databases/metagenomics/mgnify_genomes/non-model-fish-gut/v2.0/species_catalogue/MGYG0002996/MGYG000299692/genome/MGYG000299692.fna	0.129979	75	0	36.68	162	8	28203.3	199068	3959	Non-Model-Fish-Gut	84	0	200.012	408	9	0	0	NA	159
./Mouse-Gut/ftp.ebi.ac.uk/pub/databases/metagenomics/mgnify_genomes/mouse-gut/v1.0/species_catalogue/MGYG0003275/MGYG000327515/genome/MGYG000327515.fna	0.153112	71	0	283.592	10767	3	35280.6	283578	2661	Mouse-Gut	85	0	202.706	415	3	0	0	NA	156
./Marine/ftp.ebi.ac.uk/pub/databases/metagenomics/mgnify_genomes/marine/v1.0/species_catalogue/MGYG0002963/MGYG000296353/genome/MGYG000296353.fna	0.16902	78	0	93.0256	202	1	35445.9	219039	84	Marine	76	0	96.9324	192	3	0	0	NA	154
./Human-Gut/pub/databases/metagenomics/mgnify_genomes/human-gut/v2.0/species_catalogue/MGYG0000027/MGYG000002791/genome/MGYG000002791.fna	0.0922963	70	0	8.11429	21	1	21471.6	111400	2798	Human-Gut	83	0	197.253	389	2	0	0	NA	153
./Human-Gut/pub/databases/metagenomics/mgnify_genomes/human-gut/v2.0/species_catalogue/MGYG0000034/MGYG000003404/genome/MGYG000003404.fna	0.0791223	60	0	13.8167	158	1	19872.1	83911	1035	Human-Gut	93	0	275.333	538	6	0	0	NA	153
./Human-Gut/pub/databases/metagenomics/mgnify_genomes/human-gut/v2.0/species_catalogue/MGYG0000035/MGYG000003510/genome/MGYG000003510.fna	0.113282	62	0	9.67742	29	1	30117	195056	1777	Human-Gut	88	0	318.682	645	8	0	0	NA	150
./Mouse-Gut/ftp.ebi.ac.uk/pub/databases/metagenomics/mgnify_genomes/mouse-gut/v1.0/species_catalogue/MGYG0003273/MGYG000327375/genome/MGYG000327375.fna	0.129191	73	0	33.7945	86	8	29285.5	158167	32	Mouse-Gut	76	0	175.789	395	6	0	0	NA	149
./Mouse-Gut/ftp.ebi.ac.uk/pub/databases/metagenomics/mgnify_genomes/mouse-gut/v1.0/species_catalogue/MGYG0003650/MGYG000365031/genome/MGYG000365031.fna	0.114786	80	0	202.238	4556	1	15006	175331	2	Mouse-Gut	68	0	263.567	501	8	79.4286	136	4	148
./Marine/ftp.ebi.ac.uk/pub/databases/metagenomics/mgnify_genomes/marine/v1.0/species_catalogue/MGYG0002974/MGYG000297430/genome/MGYG000297430.fna	0.0734248	72	0	98.9861	178	4	16577.4	81945	72	Marine	76	0	91.8904	196	3	0	0	NA	148
./Human-Gut/pub/databases/metagenomics/mgnify_genomes/human-gut/v2.0/species_catalogue/MGYG0000027/MGYG000002790/genome/MGYG000002790.fna	0.0745685	59	0	10.3559	35	1	21106.1	93272	2035	Human-Gut	88	0	152.295	299	5	0	0	NA	147
./Human-Gut/pub/databases/metagenomics/mgnify_genomes/human-gut/v2.0/species_catalogue/MGYG0000034/MGYG000003416/genome/MGYG000003416.fna	0.117878	73	0	9.75342	32	1	27510.2	117153	1073	Human-Gut	73	0	582.74	1100	9	0	0	NA	146
./Human-Gut/pub/databases/metagenomics/mgnify_genomes/human-gut/v2.0/species_catalogue/MGYG0000035/MGYG000003521/genome/MGYG000003521.fna	0.166534	58	0	9.44828	57	1	47583.6	209076	1979	Human-Gut	86	0	383.837	770	16	0	0	NA	144
./Pig-Gut/ftp.ebi.ac.uk/pub/databases/metagenomics/mgnify_genomes/pig-gut/v1.0/species_catalogue/MGYG0003033/MGYG000303330/genome/MGYG000303330.fna	0.114381	61	0	33.3934	40	11	27495.7	139701	33	Pig-Gut	79	0	113.228	216	3	0	0	NA	140
./Human-Gut/pub/databases/metagenomics/mgnify_genomes/human-gut/v2.0/species_catalogue/MGYG0000035/MGYG000003506/genome/MGYG000003506.fna	0.0806846	52	0	7.86538	28	1	26024.2	118061	1077	Human-Gut	87	0	377.023	699	8	0	0	NA	139
./Human-Gut/pub/databases/metagenomics/mgnify_genomes/human-gut/v2.0/species_catalogue/MGYG0000034/MGYG000003474/genome/MGYG000003474.fna	0.0788404	61	0	10	29	1	21667.1	148442	1187	Human-Gut	76	0	252.961	521	2	0	0	NA	137
./Human-Gut/pub/databases/metagenomics/mgnify_genomes/human-gut/v2.0/species_catalogue/MGYG0000035/MGYG000003524/genome/MGYG000003524.fna	0.08994	49	0	9.55102	33	1	30819.1	108770	1620	Human-Gut	88	0	380.716	747	8	0	0	NA	137
./Human-Gut/pub/databases/metagenomics/mgnify_genomes/human-gut/v2.0/species_catalogue/MGYG0000034/MGYG000003438/genome/MGYG000003438.fna	0.0804287	66	0	7.9697	23	1	20729.4	113343	1012	Human-Gut	70	0	326.729	703	18	0	0	NA	136
./Mouse-Gut/ftp.ebi.ac.uk/pub/databases/metagenomics/mgnify_genomes/mouse-gut/v1.0/species_catalogue/MGYG0003282/MGYG000328231/genome/MGYG000328231.fna	0.346535	59	0	32.0508	83	7	94947.3	513953	4163	Mouse-Gut	77	0	223.844	401	4	0	0	NA	136
./Human-Gut/pub/databases/metagenomics/mgnify_genomes/human-gut/v2.0/species_catalogue/MGYG0000034/MGYG000003434/genome/MGYG000003434.fna	0.104487	59	0	9.05085	24	1	29846.5	123354	1071	Human-Gut	77	0	410.896	844	2	0	0	NA	136
./Mouse-Gut/ftp.ebi.ac.uk/pub/databases/metagenomics/mgnify_genomes/mouse-gut/v1.0/species_catalogue/MGYG0003237/MGYG000323794/genome/MGYG000323794.fna	0.0730338	64	0	31.0625	41	9	17440.5	106121	2773	Mouse-Gut	70	0	79.6429	154	3	0	0	NA	134
./Human-Gut/pub/databases/metagenomics/mgnify_genomes/human-gut/v2.0/species_catalogue/MGYG0000034/MGYG000003447/genome/MGYG000003447.fna	0.109136	62	0	9.98387	25	1	29847	123304	1138	Human-Gut	72	0	467.333	924	21	0	0	NA	134
./Human-Gut/pub/databases/metagenomics/mgnify_genomes/human-gut/v2.0/species_catalogue/MGYG0000034/MGYG000003467/genome/MGYG000003467.fna	0.113155	67	0	10.6269	24	1	28527.5	116946	1668	Human-Gut	64	0	282.688	538	15	0	0	NA	131
./Human-Gut/pub/databases/metagenomics/mgnify_genomes/human-gut/v2.0/species_catalogue/MGYG0000039/MGYG000003918/genome/MGYG000003918.fna	0.110595	57	0	37.6667	60	3	31399.6	151368	1891	Human-Gut	73	0	215.178	457	8	0	0	NA	130
./Marine/ftp.ebi.ac.uk/pub/databases/metagenomics/mgnify_genomes/marine/v1.0/species_catalogue/MGYG0002961/MGYG000296175/genome/MGYG000296175.fna	0.237481	64	0	123.453	1263	10	59472.2	267997	67	Marine	65	0	61.3231	124	2	0	0	NA	129
./Non-Model-Fish-Gut/ftp.ebi.ac.uk/pub/databases/metagenomics/mgnify_genomes/non-model-fish-gut/v2.0/species_catalogue/MGYG0002995/MGYG000299559/genome/MGYG000299559.fna	0.269468	71	0	174.028	7764	2	59826.7	454858	1106	Non-Model-Fish-Gut	57	0	306.491	577	17	0	0	NA	128
./Mouse-Gut/ftp.ebi.ac.uk/pub/databases/metagenomics/mgnify_genomes/mouse-gut/v1.0/species_catalogue/MGYG0003271/MGYG000327119/genome/MGYG000327119.fna	0.137407	65	0	35.2923	92	1	31905.2	387176	2549	Mouse-Gut	63	0	137.952	263	6	0	0	NA	128
./Marine/ftp.ebi.ac.uk/pub/databases/metagenomics/mgnify_genomes/marine/v1.0/species_catalogue/MGYG0002965/MGYG000296562/genome/MGYG000296562.fna	0.137176	61	0	101.279	193	16	35991.9	462523	2129	Marine	67	0	66.9846	134	2	0	0	NA	128
./Pig-Gut/ftp.ebi.ac.uk/pub/databases/metagenomics/mgnify_genomes/pig-gut/v1.0/species_catalogue/MGYG0003032/MGYG000303275/genome/MGYG000303275.fna	0.146237	66	0	33.697	54	2	35416.4	184304	2592	Pig-Gut	61	0	122.639	252	3	0	0	NA	127
./Human-Gut/pub/databases/metagenomics/mgnify_genomes/human-gut/v2.0/species_catalogue/MGYG0000036/MGYG000003618/genome/MGYG000003618.fna	0.107843	49	0	11.0816	38	2	36359.5	135059	1365	Human-Gut	78	0	304.564	618	3	0	0	NA	127
./Pig-Gut/ftp.ebi.ac.uk/pub/databases/metagenomics/mgnify_genomes/pig-gut/v1.0/species_catalogue/MGYG0003032/MGYG000303271/genome/MGYG000303271.fna	0.0699749	60	0	32.7833	77	1	17805.5	102567	3121	Pig-Gut	66	0	89.6364	170	2	0	0	NA	126
./Mouse-Gut/ftp.ebi.ac.uk/pub/databases/metagenomics/mgnify_genomes/mouse-gut/v1.0/species_catalogue/MGYG0003602/MGYG000360270/genome/MGYG000360270.fna	0.117716	67	0	169.03	8310	1	10659.9	49335	9	Mouse-Gut	58	0	217.517	457	9	263.154	415	10	125
./Human-Gut/pub/databases/metagenomics/mgnify_genomes/human-gut/v2.0/species_catalogue/MGYG0000035/MGYG000003576/genome/MGYG000003576.fna	0.124625	55	0	7.90909	27	1	38203.9	170361	1389	Human-Gut	69	0	292.71	617	15	0	0	NA	124
./Human-Gut/pub/databases/metagenomics/mgnify_genomes/human-gut/v2.0/species_catalogue/MGYG0000036/MGYG000003616/genome/MGYG000003616.fna	0.112412	49	0	8.38776	25	1	38486.3	159325	1227	Human-Gut	74	0	370.527	717	6	0	0	NA	123
./Human-Gut/pub/databases/metagenomics/mgnify_genomes/human-gut/v2.0/species_catalogue/MGYG0000027/MGYG000002770/genome/MGYG000002770.fna	0.140105	53	0	17.717	62	9	42774.8	284992	16	Human-Gut	69	0	167.145	327	3	0	0	NA	122
./Human-Gut/pub/databases/metagenomics/mgnify_genomes/human-gut/v2.0/species_catalogue/MGYG0000035/MGYG000003526/genome/MGYG000003526.fna	0.111622	46	0	10.1739	22	1	39391.5	235205	1242	Human-Gut	75	0	371.24	685	9	0	0	NA	121
./Human-Gut/pub/databases/metagenomics/mgnify_genomes/human-gut/v2.0/species_catalogue/MGYG0000047/MGYG000004760/genome/MGYG000004760.fna	0.0978827	69	0	29.5797	42	1	22387	224397	1868	Human-Gut	51	0	181.941	348	6	0	0	NA	120
./Human-Gut/pub/databases/metagenomics/mgnify_genomes/human-gut/v2.0/species_catalogue/MGYG0000036/MGYG000003647/genome/MGYG000003647.fna	0.0772573	48	0	5.9375	16	1	27373.7	165892	1125	Human-Gut	72	0	341.139	691	14	0	0	NA	120
./Mouse-Gut/ftp.ebi.ac.uk/pub/databases/metagenomics/mgnify_genomes/mouse-gut/v1.0/species_catalogue/MGYG0003267/MGYG000326744/genome/MGYG000326744.fna	0.0670452	49	0	33.1837	40	16	22564.3	131615	35	Mouse-Gut	70	0	105.414	202	3	0	0	NA	119
./Mouse-Gut/ftp.ebi.ac.uk/pub/databases/metagenomics/mgnify_genomes/mouse-gut/v1.0/species_catalogue/MGYG0003791/MGYG000379181/genome/MGYG000379181.fna	0.195259	56	0	243.286	5388	1	29275.4	147123	4	Mouse-Gut	62	0	252.581	474	8	63.6667	103	4	118
./Mouse-Gut/ftp.ebi.ac.uk/pub/databases/metagenomics/mgnify_genomes/mouse-gut/v1.0/species_catalogue/MGYG0003242/MGYG000324243/genome/MGYG000324243.fna	0.0670646	63	0	33.1905	42	7	16060.4	77997	2689	Mouse-Gut	54	0	80.2407	148	3	0	0	NA	117
./Human-Gut/pub/databases/metagenomics/mgnify_genomes/human-gut/v2.0/species_catalogue/MGYG0000034/MGYG000003470/genome/MGYG000003470.fna	0.126089	54	0	10.0741	29	1	38196	132358	1797	Human-Gut	61	0	286.016	578	6	0	0	NA	115
./Human-Gut/pub/databases/metagenomics/mgnify_genomes/human-gut/v2.0/species_catalogue/MGYG0000021/MGYG000002119/genome/MGYG000002119.fna	0.0972489	53	0	32.2264	42	1	30725.2	163260	1779	Human-Gut	60	0	212.55	406	2	0	0	NA	113
./Human-Gut/pub/databases/metagenomics/mgnify_genomes/human-gut/v2.0/species_catalogue/MGYG0000034/MGYG000003435/genome/MGYG000003435.fna	0.130911	49	0	10.449	24	1	44756.8	123605	5	Human-Gut	64	0	371.031	689	2	0	0	NA	113
./Human-Gut/pub/databases/metagenomics/mgnify_genomes/human-gut/v2.0/species_catalogue/MGYG0000033/MGYG000003301/genome/MGYG000003301.fna	0.0992679	56	0	23.9286	78	1	30041.3	107576	1562	Human-Gut	55	0	374.036	689	6	0	0	NA	111
./Human-Gut/pub/databases/metagenomics/mgnify_genomes/human-gut/v2.0/species_catalogue/MGYG0000005/MGYG000000546/genome/MGYG000000546.fna	0.180778	52	0	10.4808	30	1	45266.9	206350	11	Human-Gut	58	0	127.241	245	7	0	0	NA	110
./Human-Gut/pub/databases/metagenomics/mgnify_genomes/human-gut/v2.0/species_catalogue/MGYG0000036/MGYG000003623/genome/MGYG000003623.fna	0.0795136	41	0	7.68293	22	1	32578.2	164413	2210	Human-Gut	68	0	288.676	559	22	0	0	NA	109
./Human-Gut/pub/databases/metagenomics/mgnify_genomes/human-gut/v2.0/species_catalogue/MGYG0000027/MGYG000002788/genome/MGYG000002788.fna	0.0843523	55	0	62.1091	2992	1	21971.2	147200	2063	Human-Gut	53	0	133.962	284	10	0	0	NA	108
./Marine/ftp.ebi.ac.uk/pub/databases/metagenomics/mgnify_genomes/marine/v1.0/species_catalogue/MGYG0002966/MGYG000296638/genome/MGYG000296638.fna	0.121926	48	0	22.1667	40	1	42392.1	163326	2190	Marine	60	0	228.583	468	2	0	0	NA	108
./Human-Gut/pub/databases/metagenomics/mgnify_genomes/human-gut/v2.0/species_catalogue/MGYG0000034/MGYG000003429/genome/MGYG000003429.fna	0.115553	49	0	11.6939	37	1	37882.3	166399	1396	Human-Gut	58	0	293.345	509	4	0	0	NA	107
./Mouse-Gut/ftp.ebi.ac.uk/pub/databases/metagenomics/mgnify_genomes/mouse-gut/v1.0/species_catalogue/MGYG0003274/MGYG000327486/genome/MGYG000327486.fna	0.168986	47	0	118.66	4166	7	51224.2	336208	2609	Mouse-Gut	60	0	157.333	319	4	0	0	NA	107
./Human-Gut/pub/databases/metagenomics/mgnify_genomes/human-gut/v2.0/species_catalogue/MGYG0000033/MGYG000003300/genome/MGYG000003300.fna	0.107085	47	0	27.8936	99	1	36842.4	288103	2140	Human-Gut	60	0	210.733	415	3	0	0	NA	107
./Human-Gut/pub/databases/metagenomics/mgnify_genomes/human-gut/v2.0/species_catalogue/MGYG0000033/MGYG000003371.1/genome/MGYG000003371.1.fna	0.219493	49	0	9.36735	26	1	74761.6	401868	1042	Human-Gut	57	0	954.684	1802	12	0	0	NA	106
./Mouse-Gut/ftp.ebi.ac.uk/pub/databases/metagenomics/mgnify_genomes/mouse-gut/v1.0/species_catalogue/MGYG0003282/MGYG000328218/genome/MGYG000328218.fna	0.116244	54	0	31.0556	91	1	34699.5	176030	3226	Mouse-Gut	50	0	131.84	243	29	0	0	NA	104
./Human-Gut/pub/databases/metagenomics/mgnify_genomes/human-gut/v2.0/species_catalogue/MGYG0000034/MGYG000003441/genome/MGYG000003441.fna	0.0724769	44	0	31.0227	1066	1	26798.9	131322	1266	Human-Gut	60	0	334.517	629	2	0	0	NA	104
./Human-Gut/pub/databases/metagenomics/mgnify_genomes/human-gut/v2.0/species_catalogue/MGYG0000033/MGYG000003338/genome/MGYG000003338.fna	0.190828	52	0	8	24	1	60221.8	284940	1488	Human-Gut	51	0	400.922	828	62	0	0	NA	103
./Human-Gut/pub/databases/metagenomics/mgnify_genomes/human-gut/v2.0/species_catalogue/MGYG0000039/MGYG000003911/genome/MGYG000003911.fna	0.112664	49	0	236.449	9979	7	38103.3	331285	2378	Human-Gut	54	0	206.204	391	20	0	0	NA	103
./Mouse-Gut/ftp.ebi.ac.uk/pub/databases/metagenomics/mgnify_genomes/mouse-gut/v1.0/species_catalogue/MGYG0003268/MGYG000326885/genome/MGYG000326885.fna	0.0765589	53	0	32.9245	49	1	23443.9	102789	2549	Mouse-Gut	49	0	111.143	207	5	0	0	NA	102
./Human-Gut/pub/databases/metagenomics/mgnify_genomes/human-gut/v2.0/species_catalogue/MGYG0000034/MGYG000003413/genome/MGYG000003413.fna	0.149234	41	0	10.1951	30	1	61214.8	221556	1323	Human-Gut	61	0	276.902	564	6	0	0	NA	102
./Mouse-Gut/ftp.ebi.ac.uk/pub/databases/metagenomics/mgnify_genomes/mouse-gut/v1.0/species_catalogue/MGYG0003816/MGYG000381662/genome/MGYG000381662.fna	0.0860077	52	0	824.904	8461	1	3776.15	23000	2	Mouse-Gut	49	0	212.816	464	9	470.543	811	47	101
./Human-Gut/pub/databases/metagenomics/mgnify_genomes/human-gut/v2.0/species_catalogue/MGYG0000029/MGYG000002950.1/genome/MGYG000002950.1.fna	0.0874463	46	0	27.2174	72	2	30935.2	280605	2101	Human-Gut	55	0	204.073	361	7	0	0	NA	101
./Mouse-Gut/ftp.ebi.ac.uk/pub/databases/metagenomics/mgnify_genomes/mouse-gut/v1.0/species_catalogue/MGYG0003321/MGYG000332160/genome/MGYG000332160.fna	0.214682	51	0	15004	164737	10	12503.4	153180	1	Mouse-Gut	49	0	61.4146	129	4	632.421	859	112	100
./Human-Gut/pub/databases/metagenomics/mgnify_genomes/human-gut/v2.0/species_catalogue/MGYG0000005/MGYG000000547/genome/MGYG000000547.fna	0.0969146	52	0	9.98077	33	1	29042.5	187058	3163	Human-Gut	47	0	318.851	556	7	0	0	NA	99
./Human-Gut/pub/databases/metagenomics/mgnify_genomes/human-gut/v2.0/species_catalogue/MGYG0000004/MGYG000000470/genome/MGYG000000470.fna	0.160469	52	0	11.3462	30	2	50331.7	711252	1946	Human-Gut	47	0	140.702	240	4	0	0	NA	99
./Human-Gut/pub/databases/metagenomics/mgnify_genomes/human-gut/v2.0/species_catalogue/MGYG0000004/MGYG000000481/genome/MGYG000000481.fna	0.145493	47	0	10.5106	26	1	49607.2	289691	1632	Human-Gut	52	0	123.577	226	6	0	0	NA	99
./Human-Gut/pub/databases/metagenomics/mgnify_genomes/human-gut/v2.0/species_catalogue/MGYG0000036/MGYG000003644/genome/MGYG000003644.fna	0.123141	52	0	9.92308	36	1	40036.6	263746	2116	Human-Gut	46	0	335.783	648	39	0	0	NA	98
./Human-Gut/pub/databases/metagenomics/mgnify_genomes/human-gut/v2.0/species_catalogue/MGYG0000035/MGYG000003540/genome/MGYG000003540.fna	0.115215	49	0	9.4898	27	1	39406.8	207435	1077	Human-Gut	49	0	240.327	496	9	0	0	NA	98
./Human-Gut/pub/databases/metagenomics/mgnify_genomes/human-gut/v2.0/species_catalogue/MGYG0000036/MGYG000003636/genome/MGYG000003636.fna	0.134447	44	0	10.3636	25	1	50521.2	340931	25	Human-Gut	54	0	263.833	567	11	0	0	NA	98
./Human-Gut/pub/databases/metagenomics/mgnify_genomes/human-gut/v2.0/species_catalogue/MGYG0000035/MGYG000003531/genome/MGYG000003531.fna	0.102339	39	0	10.359	28	1	43532.2	208182	1399	Human-Gut	59	0	284.5	504	13	0	0	NA	98
./Human-Gut/pub/databases/metagenomics/mgnify_genomes/human-gut/v2.0/species_catalogue/MGYG0000032/MGYG000003211/genome/MGYG000003211.fna	0.12641	47	0	9.48936	31	1	41638.4	177651	1197	Human-Gut	50	0	337.02	685	6	0	0	NA	97
./Mouse-Gut/ftp.ebi.ac.uk/pub/databases/metagenomics/mgnify_genomes/mouse-gut/v1.0/species_catalogue/MGYG0003274/MGYG000327466/genome/MGYG000327466.fna	0.183123	49	0	342.918	15204	15	49462	309562	4488	Mouse-Gut	47	0	133.851	265	6	0	0	NA	96
./Human-Gut/pub/databases/metagenomics/mgnify_genomes/human-gut/v2.0/species_catalogue/MGYG0000034/MGYG000003406/genome/MGYG000003406.fna	0.103695	45	0	13.5111	91	1	37509.3	170264	1538	Human-Gut	50	0	133.52	263	3	0	0	NA	95
./Human-Gut/pub/databases/metagenomics/mgnify_genomes/human-gut/v2.0/species_catalogue/MGYG0000035/MGYG000003536/genome/MGYG000003536.fna	0.107236	44	0	8.79545	23	1	40822.3	176665	1314	Human-Gut	51	0	227	528	15	0	0	NA	95
./Human-Gut/pub/databases/metagenomics/mgnify_genomes/human-gut/v2.0/species_catalogue/MGYG0000035/MGYG000003509/genome/MGYG000003509.fna	0.0759809	41	0	7.53659	21	1	31399.8	141856	1318	Human-Gut	54	0	241.963	488	9	0	0	NA	95
./Human-Gut/pub/databases/metagenomics/mgnify_genomes/human-gut/v2.0/species_catalogue/MGYG0000032/MGYG000003210/genome/MGYG000003210.fna	0.125569	37	0	7.83784	23	1	50020.6	315123	1765	Human-Gut	58	0	357.362	681	6	0	0	NA	95
./Human-Gut/pub/databases/metagenomics/mgnify_genomes/human-gut/v2.0/species_catalogue/MGYG0000035/MGYG000003541/genome/MGYG000003541.fna	0.0755556	39	0	8.87179	30	1	31505.6	162280	1544	Human-Gut	55	0	273.2	601	13	0	0	NA	94
./Human-Gut/pub/databases/metagenomics/mgnify_genomes/human-gut/v2.0/species_catalogue/MGYG0000004/MGYG000000499/genome/MGYG000000499.fna	0.157636	47	0	10.7872	30	1	55166.7	488692	4096	Human-Gut	46	0	113.391	256	4	0	0	NA	93
./Human-Gut/pub/databases/metagenomics/mgnify_genomes/human-gut/v2.0/species_catalogue/MGYG0000033/MGYG000003341/genome/MGYG000003341.fna	0.116432	38	0	13.5	31	2	50399.5	213991	2676	Human-Gut	55	0	175.564	296	23	0	0	NA	93
./Mouse-Gut/ftp.ebi.ac.uk/pub/databases/metagenomics/mgnify_genomes/mouse-gut/v1.0/species_catalogue/MGYG0003238/MGYG000323872/genome/MGYG000323872.fna	0.143098	48	0	32.1458	41	2	46956.1	183789	2625	Mouse-Gut	43	0	86.7674	178	2	0	0	NA	91
./Mouse-Gut/ftp.ebi.ac.uk/pub/databases/metagenomics/mgnify_genomes/mouse-gut/v1.0/species_catalogue/MGYG0003274/MGYG000327472/genome/MGYG000327472.fna	0.0853381	47	0	33.8936	44	16	22971.1	149397	4201	Mouse-Gut	44	0	77.1818	152	2	0	0	NA	91
./Human-Gut/pub/databases/metagenomics/mgnify_genomes/human-gut/v2.0/species_catalogue/MGYG0000034/MGYG000003426/genome/MGYG000003426.fna	0.0748693	38	0	7.10526	25	1	33013.9	131382	1892	Human-Gut	53	0	276.962	564	7	0	0	NA	91
./Human-Gut/pub/databases/metagenomics/mgnify_genomes/human-gut/v2.0/species_catalogue/MGYG0000035/MGYG000003516/genome/MGYG000003516.fna	0.0946915	38	0	8.78947	19	1	41859.4	170716	2275	Human-Gut	53	0	147.755	293	13	0	0	NA	91
./Human-Gut/pub/databases/metagenomics/mgnify_genomes/human-gut/v2.0/species_catalogue/MGYG0000005/MGYG000000544/genome/MGYG000000544.fna	0.118196	48	0	10.2292	25	1	40065.7	257475	3766	Human-Gut	42	0	123.571	226	14	0	0	NA	90
./Mouse-Gut/ftp.ebi.ac.uk/pub/databases/metagenomics/mgnify_genomes/mouse-gut/v1.0/species_catalogue/MGYG0003271/MGYG000327114/genome/MGYG000327114.fna	0.111305	34	0	38.5	76	24	53856.2	235862	2593	Mouse-Gut	56	0	202.714	437	5	0	0	NA	90
./Human-Gut/pub/databases/metagenomics/mgnify_genomes/human-gut/v2.0/species_catalogue/MGYG0000035/MGYG000003595/genome/MGYG000003595.fna	0.147271	33	0	8.69697	21	1	74695.2	354776	1694	Human-Gut	57	0	204.491	403	9	0	0	NA	90
./Human-Gut/pub/databases/metagenomics/mgnify_genomes/human-gut/v2.0/species_catalogue/MGYG0000036/MGYG000003627/genome/MGYG000003627.fna	0.111242	33	0	8.09091	24	1	56835.3	199210	1094	Human-Gut	57	0	228.632	525	7	0	0	NA	90
./Mouse-Gut/ftp.ebi.ac.uk/pub/databases/metagenomics/mgnify_genomes/mouse-gut/v1.0/species_catalogue/MGYG0003282/MGYG000328207/genome/MGYG000328207.fna	0.317718	41	0	29.7561	40	3	118632	503378	4507	Mouse-Gut	48	0	193.375	412	5	0	0	NA	89
./Human-Gut/pub/databases/metagenomics/mgnify_genomes/human-gut/v2.0/species_catalogue/MGYG0000032/MGYG000003206/genome/MGYG000003206.fna	0.108569	34	0	7.08824	23	1	50847.9	324937	1044	Human-Gut	55	0	392.618	682	17	0	0	NA	89
./Pig-Gut/ftp.ebi.ac.uk/pub/databases/metagenomics/mgnify_genomes/pig-gut/v1.0/species_catalogue/MGYG0003032/MGYG000303279/genome/MGYG000303279.fna	0.0475528	40	0	32.675	42	3	19481.2	123900	2714	Pig-Gut	48	0	57.4167	124	2	0	0	NA	88
./Marine/ftp.ebi.ac.uk/pub/databases/metagenomics/mgnify_genomes/marine/v1.0/species_catalogue/MGYG0002963/MGYG000296351/genome/MGYG000296351.fna	0.181784	37	0	112.108	207	1	73038.9	616866	2175	Marine	51	0	68.4118	127	12	0	0	NA	88
./Human-Gut/pub/databases/metagenomics/mgnify_genomes/human-gut/v2.0/species_catalogue/MGYG0000033/MGYG000003328/genome/MGYG000003328.fna	0.0986567	29	0	12.8966	29	1	57476.6	310304	1340	Human-Gut	58	0	324.828	592	54	0	0	NA	87
./Human-Gut/pub/databases/metagenomics/mgnify_genomes/human-gut/v2.0/species_catalogue/MGYG0000021/MGYG000002120/genome/MGYG000002120.fna	0.111628	41	0	33.122	41	6	43528	241626	1687	Human-Gut	45	0	226.222	397	2	0	0	NA	86
./Human-Gut/pub/databases/metagenomics/mgnify_genomes/human-gut/v2.0/species_catalogue/MGYG0000004/MGYG000000474/genome/MGYG000000474.fna	0.113673	41	0	11.8537	31	1	43011.1	211597	1818	Human-Gut	44	0	191.636	365	2	0	0	NA	85
./Mouse-Gut/ftp.ebi.ac.uk/pub/databases/metagenomics/mgnify_genomes/mouse-gut/v1.0/species_catalogue/MGYG0003271/MGYG000327182/genome/MGYG000327182.fna	0.193223	53	0	34.5283	40	15	60290.8	324221	3218	Mouse-Gut	31	0	186.742	328	8	0	0	NA	84
./Human-Gut/pub/databases/metagenomics/mgnify_genomes/human-gut/v2.0/species_catalogue/MGYG0000034/MGYG000003436/genome/MGYG000003436.fna	0.141488	35	0	10.9429	74	1	64681	297795	2779	Human-Gut	49	0	230.245	442	2	0	0	NA	84
./Human-Gut/pub/databases/metagenomics/mgnify_genomes/human-gut/v2.0/species_catalogue/MGYG0000036/MGYG000003614/genome/MGYG000003614.fna	0.113703	33	0	14.3333	227	1	56748.7	212341	1298	Human-Gut	51	0	349.98	700	3	0	0	NA	84
./Marine/ftp.ebi.ac.uk/pub/databases/metagenomics/mgnify_genomes/marine/v1.0/species_catalogue/MGYG0002969/MGYG000296964/genome/MGYG000296964.fna	0.240132	44	0	116.886	1051	14	82159.6	356772	67	Marine	39	0	63.1538	122	2	0	0	NA	83
./Human-Gut/pub/databases/metagenomics/mgnify_genomes/human-gut/v2.0/species_catalogue/MGYG0000033/MGYG000003320/genome/MGYG000003320.fna	0.131268	33	0	15.6364	32	8	65793.3	288507	1929	Human-Gut	50	0	132.36	282	3	0	0	NA	83
./Human-Gut/pub/databases/metagenomics/mgnify_genomes/human-gut/v2.0/species_catalogue/MGYG0000035/MGYG000003582/genome/MGYG000003582.fna	0.107433	30	0	9.53333	23	1	59806.4	444660	1338	Human-Gut	53	0	188.962	380	10	0	0	NA	83
./Mouse-Gut/ftp.ebi.ac.uk/pub/databases/metagenomics/mgnify_genomes/mouse-gut/v1.0/species_catalogue/MGYG0003271/MGYG000327120/genome/MGYG000327120.fna	0.0824727	42	0	33.0238	44	4	31500.7	115115	2633	Mouse-Gut	40	0	168.5	320	11	0	0	NA	82
./Human-Gut/pub/databases/metagenomics/mgnify_genomes/human-gut/v2.0/species_catalogue/MGYG0000039/MGYG000003910/genome/MGYG000003910.fna	0.147191	40	0	35.425	67	9	60056.5	432907	3303	Human-Gut	42	0	98.2381	222	6	0	0	NA	82
./Human-Gut/pub/databases/metagenomics/mgnify_genomes/human-gut/v2.0/species_catalogue/MGYG0000034/MGYG000003490/genome/MGYG000003490.fna	0.14757	39	0	9.07692	22	1	63594.4	348691	5343	Human-Gut	43	0	638.651	1173	17	0	0	NA	82
./Human-Gut/pub/databases/metagenomics/mgnify_genomes/human-gut/v2.0/species_catalogue/MGYG0000037/MGYG000003733/genome/MGYG000003733.fna	0.440625	34	0	15.4412	31	3	197921	821774	3295	Human-Gut	47	0	199.638	451	5	0	0	NA	81
./Human-Gut/pub/databases/metagenomics/mgnify_genomes/human-gut/v2.0/species_catalogue/MGYG0000027/MGYG000002771/genome/MGYG000002771.fna	0.10244	39	0	17.5128	33	9	39562.9	210771	1641	Human-Gut	41	0	101.195	204	7	0	0	NA	80
./Human-Gut/pub/databases/metagenomics/mgnify_genomes/human-gut/v2.0/species_catalogue/MGYG0000035/MGYG000003599/genome/MGYG000003599.fna	0.0819282	37	0	9.45946	26	1	37496.6	206741	1145	Human-Gut	43	0	326.651	645	3	0	0	NA	80
./Human-Gut/pub/databases/metagenomics/mgnify_genomes/human-gut/v2.0/species_catalogue/MGYG0000039/MGYG000003907/genome/MGYG000003907.fna	0.0794708	35	0	33.7714	70	7	32626.3	134742	1798	Human-Gut	45	0	127.111	273	5	0	0	NA	80
./Human-Gut/pub/databases/metagenomics/mgnify_genomes/human-gut/v2.0/species_catalogue/MGYG0000036/MGYG000003638/genome/MGYG000003638.fna	0.12542	31	0	8.03226	18	1	67638.4	264479	1343	Human-Gut	48	0	234	437	13	0	0	NA	79
./Honeybee-Gut/ftp.ebi.ac.uk/pub/databases/metagenomics/mgnify_genomes/honeybee-gut/v1.0/species_catalogue/MGYG0003212/MGYG000321269/genome/MGYG000321269.fna	0.0733703	46	0	36.4565	81	1	26087.4	192977	2793	Honeybee-Gut	32	0	111.188	216	13	0	0	NA	78
./Human-Gut/pub/databases/metagenomics/mgnify_genomes/human-gut/v2.0/species_catalogue/MGYG0000005/MGYG000000516/genome/MGYG000000516.fna	0.110247	36	0	8	21	1	45519.8	256535	1988	Human-Gut	42	0	179.595	352	11	0	0	NA	78
./Human-Gut/pub/databases/metagenomics/mgnify_genomes/human-gut/v2.0/species_catalogue/MGYG0000034/MGYG000003421/genome/MGYG000003421.fna	0.177943	33	0	11.1212	23	1	89673.4	272637	6751	Human-Gut	43	0	191.767	388	8	0	0	NA	76
./Human-Gut/pub/databases/metagenomics/mgnify_genomes/human-gut/v2.0/species_catalogue/MGYG0000035/MGYG000003586/genome/MGYG000003586.fna	0.139321	39	0	158.487	4174	1	59695.4	224831	1026	Human-Gut	36	0	396.886	689	4	0	0	NA	75
./Human-Gut/pub/databases/metagenomics/mgnify_genomes/human-gut/v2.0/species_catalogue/MGYG0000034/MGYG000003499/genome/MGYG000003499.fna	0.0803978	36	0	8.52778	28	1	34832.8	190247	1733	Human-Gut	39	0	372.103	737	29	0	0	NA	75
./Human-Gut/pub/databases/metagenomics/mgnify_genomes/human-gut/v2.0/species_catalogue/MGYG0000035/MGYG000003522/genome/MGYG000003522.fna	0.0516489	31	0	10.2581	33	1	28203.6	75094	1095	Human-Gut	43	0	223.279	392	10	0	0	NA	74
./Human-Gut/pub/databases/metagenomics/mgnify_genomes/human-gut/v2.0/species_catalogue/MGYG0000016/MGYG000001662/genome/MGYG000001662.fna	0.0822887	32	0	189.625	5666	2	42313.5	184875	3	Human-Gut	41	0	114	225	5	0	0	NA	73
./Non-Model-Fish-Gut/ftp.ebi.ac.uk/pub/databases/metagenomics/mgnify_genomes/non-model-fish-gut/v2.0/species_catalogue/MGYG0002995/MGYG000299518/genome/MGYG000299518.fna	0.0764037	34	0	29.2941	38	1	35689.1	92943	2740	Non-Model-Fish-Gut	38	0	129.816	271	8	0	0	NA	72
./Human-Gut/pub/databases/metagenomics/mgnify_genomes/human-gut/v2.0/species_catalogue/MGYG0000004/MGYG000000461/genome/MGYG000000461.fna	0.0538979	30	0	11.9667	31	1	24280.7	142678	1534	Human-Gut	42	0	70.0952	145	2	0	0	NA	72
./Non-Model-Fish-Gut/ftp.ebi.ac.uk/pub/databases/metagenomics/mgnify_genomes/non-model-fish-gut/v2.0/species_catalogue/MGYG0002996/MGYG000299689/genome/MGYG000299689.fna	0.198693	30	0	36.4333	44	23	95310.1	323389	5025	Non-Model-Fish-Gut	41	0	72.5366	155	6	0	0	NA	71
./Human-Gut/pub/databases/metagenomics/mgnify_genomes/human-gut/v2.0/species_catalogue/MGYG0000034/MGYG000003451/genome/MGYG000003451.fna	0.108947	30	0	9.66667	32	1	60728.5	250691	2794	Human-Gut	41	0	232.854	455	32	0	0	NA	71
./Human-Gut/pub/databases/metagenomics/mgnify_genomes/human-gut/v2.0/species_catalogue/MGYG0000005/MGYG000000548/genome/MGYG000000548.fna	0.135953	30	0	11.2667	42	1	64278.2	280809	6	Human-Gut	40	0	125.375	205	7	0	0	NA	70
./Mouse-Gut/ftp.ebi.ac.uk/pub/databases/metagenomics/mgnify_genomes/mouse-gut/v1.0/species_catalogue/MGYG0003227/MGYG000322759/genome/MGYG000322759.fna	0.173903	37	0	553.297	11275	13	49189.9	310351	17	Mouse-Gut	32	0	96.3438	160	5	154.692	265	4	69
./Human-Gut/pub/databases/metagenomics/mgnify_genomes/human-gut/v2.0/species_catalogue/MGYG0000032/MGYG000003235/genome/MGYG000003235.fna	0.0749187	35	0	9.6	36	1	33459.7	213980	1014	Human-Gut	34	0	290	577	17	0	0	NA	69
./Human-Gut/pub/databases/metagenomics/mgnify_genomes/human-gut/v2.0/species_catalogue/MGYG0000015/MGYG000001568/genome/MGYG000001568.fna	0.0863459	31	0	10.2258	25	1	46290.1	169349	1799	Human-Gut	38	0	220.658	387	6	0	0	NA	69
./Human-Gut/pub/databases/metagenomics/mgnify_genomes/human-gut/v2.0/species_catalogue/MGYG0000032/MGYG000003218/genome/MGYG000003218.fna	0.0994051	31	0	13.6774	40	1	46766.8	214276	1714	Human-Gut	38	0	215.211	404	23	0	0	NA	69
./Mouse-Gut/ftp.ebi.ac.uk/pub/databases/metagenomics/mgnify_genomes/mouse-gut/v1.0/species_catalogue/MGYG0003272/MGYG000327280/genome/MGYG000327280.fna	0.0646261	29	0	37.931	232	3	36520.4	224116	5310	Mouse-Gut	40	0	97.3	194	6	0	0	NA	69
./Human-Gut/pub/databases/metagenomics/mgnify_genomes/human-gut/v2.0/species_catalogue/MGYG0000035/MGYG000003545/genome/MGYG000003545.fna	0.0864661	19	0	8.68421	21	1	71462.7	240598	9199	Human-Gut	50	0	197.4	411	5	0	0	NA	69
./Marine/ftp.ebi.ac.uk/pub/databases/metagenomics/mgnify_genomes/marine/v1.0/species_catalogue/MGYG0002963/MGYG000296365/genome/MGYG000296365.fna	0.138156	32	0	543.188	13986	11	68859.5	539425	4138	Marine	36	0	88.8824	180	8	0	0	NA	68
./Human-Gut/pub/databases/metagenomics/mgnify_genomes/human-gut/v2.0/species_catalogue/MGYG0000036/MGYG000003604/genome/MGYG000003604.fna	0.0934573	31	0	9.29032	25	1	49961.2	154064	3364	Human-Gut	37	0	190.568	403	4	0	0	NA	68
./Human-Gut/pub/databases/metagenomics/mgnify_genomes/human-gut/v2.0/species_catalogue/MGYG0000032/MGYG000003239/genome/MGYG000003239.fna	0.151079	36	0	12.8889	41	2	66183.4	432013	3597	Human-Gut	31	0	156.806	289	5	0	0	NA	67
./Human-Oral/ftp.ebi.ac.uk/pub/databases/metagenomics/mgnify_genomes/human-oral/v1.0/species_catalogue/MGYG0002990/MGYG000299017/genome/MGYG000299017.fna	0.102102	35	0	26.5143	57	2	36788.6	219716	3370	Human-Oral	31	0	80.129	161	2	0	0	NA	66
./Mouse-Gut/ftp.ebi.ac.uk/pub/databases/metagenomics/mgnify_genomes/mouse-gut/v1.0/species_catalogue/MGYG0003274/MGYG000327494/genome/MGYG000327494.fna	0.160385	31	0	31.2581	43	1	74021.8	231967	3147	Mouse-Gut	35	0	98.1714	199	10	0	0	NA	66
./Human-Gut/pub/databases/metagenomics/mgnify_genomes/human-gut/v2.0/species_catalogue/MGYG0000035/MGYG000003511/genome/MGYG000003511.fna	0.124467	30	0	9.96667	22	1	67698.5	165258	4152	Human-Gut	36	0	146.083	302	5	0	0	NA	66
./Human-Gut/pub/databases/metagenomics/mgnify_genomes/human-gut/v2.0/species_catalogue/MGYG0000027/MGYG000002768/genome/MGYG000002768.fna	0.090472	48	0	12.125	16	12	28904.1	152314	2164	Human-Gut	17	0	152.706	330	8	0	0	NA	65
./Mouse-Gut/ftp.ebi.ac.uk/pub/databases/metagenomics/mgnify_genomes/mouse-gut/v1.0/species_catalogue/MGYG0003237/MGYG000323767/genome/MGYG000323767.fna	0.0413179	36	0	32.5278	42	7	18400.2	83561	15	Mouse-Gut	29	0	30.5862	75	3	0	0	NA	65
./Human-Gut/pub/databases/metagenomics/mgnify_genomes/human-gut/v2.0/species_catalogue/MGYG0000036/MGYG000003642/genome/MGYG000003642.fna	0.226754	32	0	10.25	27	1	113545	413001	4053	Human-Gut	33	0	258.758	536	5	0	0	NA	65
./Human-Gut/pub/databases/metagenomics/mgnify_genomes/human-gut/v2.0/species_catalogue/MGYG0000016/MGYG000001657/genome/MGYG000001657.fna	0.17746	30	0	15.4333	41	1	83571.3	547456	4208	Human-Gut	35	0	163.6	273	19	0	0	NA	65
./Human-Gut/pub/databases/metagenomics/mgnify_genomes/human-gut/v2.0/species_catalogue/MGYG0000034/MGYG000003494/genome/MGYG000003494.fna	0.137847	28	0	10.0714	24	2	78722.8	283618	3328	Human-Gut	37	0	238	445	5	0	0	NA	65
./Human-Gut/pub/databases/metagenomics/mgnify_genomes/human-gut/v2.0/species_catalogue/MGYG0000034/MGYG000003432/genome/MGYG000003432.fna	0.138877	25	0	10.52	21	4	91671.3	341700	5798	Human-Gut	40	0	171.45	333	9	0	0	NA	65
./Mouse-Gut/ftp.ebi.ac.uk/pub/databases/metagenomics/mgnify_genomes/mouse-gut/v1.0/species_catalogue/MGYG0003274/MGYG000327426/genome/MGYG000327426.fna	0.0707446	35	0	29.6	40	2	33153.6	114984	5057	Mouse-Gut	29	0	85.069	153	2	0	0	NA	64
./Human-Gut/pub/databases/metagenomics/mgnify_genomes/human-gut/v2.0/species_catalogue/MGYG0000036/MGYG000003629/genome/MGYG000003629.fna	0.075369	29	0	9.58621	23	1	38666	144769	1355	Human-Gut	35	0	271.029	502	5	0	0	NA	64
./Human-Gut/pub/databases/metagenomics/mgnify_genomes/human-gut/v2.0/species_catalogue/MGYG0000032/MGYG000003241/genome/MGYG000003241.fna	0.118406	38	0	11.8421	62	1	51132.2	203442	1465	Human-Gut	25	0	169.92	341	35	0	0	NA	63
./Mouse-Gut/ftp.ebi.ac.uk/pub/databases/metagenomics/mgnify_genomes/mouse-gut/v1.0/species_catalogue/MGYG0003273/MGYG000327349/genome/MGYG000327349.fna	0.11342	34	0	32.8529	39	11	51911.9	201779	4680	Mouse-Gut	29	0	190.069	353	7	0	0	NA	63
./Marine/ftp.ebi.ac.uk/pub/databases/metagenomics/mgnify_genomes/marine/v1.0/species_catalogue/MGYG0002965/MGYG000296581/genome/MGYG000296581.fna	0.0248871	31	0	80.5484	174	9	12449.4	50627	70	Marine	32	0	43.5	72	4	0	0	NA	63
./Mouse-Gut/ftp.ebi.ac.uk/pub/databases/metagenomics/mgnify_genomes/mouse-gut/v1.0/species_catalogue/MGYG0003275/MGYG000327552/genome/MGYG000327552.fna	0.0914215	28	0	33.8571	66	9	49624	336295	3395	Mouse-Gut	35	0	116.971	204	5	0	0	NA	63
./Human-Gut/pub/databases/metagenomics/mgnify_genomes/human-gut/v2.0/species_catalogue/MGYG0000034/MGYG000003415/genome/MGYG000003415.fna	0.100159	27	0	8.88889	23	1	59048.7	212927	2383	Human-Gut	36	0	174.944	350	3	0	0	NA	63
./Human-Gut/pub/databases/metagenomics/mgnify_genomes/human-gut/v2.0/species_catalogue/MGYG0000005/MGYG000000505/genome/MGYG000000505.fna	0.0680112	26	0	9.84615	27	1	36642.1	164509	4095	Human-Gut	37	0	92.6757	163	2	0	0	NA	63
./Marine/ftp.ebi.ac.uk/pub/databases/metagenomics/mgnify_genomes/marine/v1.0/species_catalogue/MGYG0002974/MGYG000297403/genome/MGYG000297403.fna	0.24142	28	0	128.536	292	6	119370	804145	2203	Marine	34	0	178.441	391	6	0	0	NA	62
./Human-Gut/pub/databases/metagenomics/mgnify_genomes/human-gut/v2.0/species_catalogue/MGYG0000016/MGYG000001665/genome/MGYG000001665.fna	0.128619	28	0	51.3929	1209	1	71872.7	377508	4818	Human-Gut	34	0	136.176	271	10	0	0	NA	62
./Human-Gut/pub/databases/metagenomics/mgnify_genomes/human-gut/v2.0/species_catalogue/MGYG0000016/MGYG000001660/genome/MGYG000001660.fna	0.128636	26	0	14.3077	40	2	65419.2	190597	3089	Human-Gut	36	0	122.229	254	8	0	0	NA	62
./Human-Gut/pub/databases/metagenomics/mgnify_genomes/human-gut/v2.0/species_catalogue/MGYG0000034/MGYG000003461/genome/MGYG000003461.fna	0.137345	23	0	9.52174	24	1	99560.2	499400	3037	Human-Gut	39	0	265.821	522	33	0	0	NA	62
./Human-Gut/pub/databases/metagenomics/mgnify_genomes/human-gut/v2.0/species_catalogue/MGYG0000034/MGYG000003453/genome/MGYG000003453.fna	0.0490468	29	0	9.03448	23	1	27235.7	97341	15	Human-Gut	32	0	130	258	8	0	0	NA	61
./Non-Model-Fish-Gut/ftp.ebi.ac.uk/pub/databases/metagenomics/mgnify_genomes/non-model-fish-gut/v2.0/species_catalogue/MGYG0002996/MGYG000299681/genome/MGYG000299681.fna	0.0467423	31	0	36.8387	91	9	22744.9	87396	36	Non-Model-Fish-Gut	29	0	88	176	4	0	0	NA	60
./Human-Gut/pub/databases/metagenomics/mgnify_genomes/human-gut/v2.0/species_catalogue/MGYG0000036/MGYG000003633/genome/MGYG000003633.fna	0.0855459	29	0	7.03448	22	1	49747.8	129316	5576	Human-Gut	31	0	243	485	20	0	0	NA	60
./Human-Gut/pub/databases/metagenomics/mgnify_genomes/human-gut/v2.0/species_catalogue/MGYG0000036/MGYG000003648/genome/MGYG000003648.fna	0.225314	28	0	25.0357	256	3	116145	428287	17024	Human-Gut	32	0	283.719	482	7	0	0	NA	60
./Human-Gut/pub/databases/metagenomics/mgnify_genomes/human-gut/v2.0/species_catalogue/MGYG0000035/MGYG000003519/genome/MGYG000003519.fna	0.0395651	27	0	8.77778	20	2	24763.3	95116	1039	Human-Gut	32	0	167.094	333	5	0	0	NA	59
./Marine/ftp.ebi.ac.uk/pub/databases/metagenomics/mgnify_genomes/marine/v1.0/species_catalogue/MGYG0002966/MGYG000296664/genome/MGYG000296664.fna	0.146463	24	0	15.5417	42	1	101933	622049	4050	Marine	35	0	268.143	515	9	0	0	NA	59
./Human-Gut/pub/databases/metagenomics/mgnify_genomes/human-gut/v2.0/species_catalogue/MGYG0000035/MGYG000003564/genome/MGYG000003564.fna	0.102938	21	0	8.90476	19	1	82397.8	315231	7723	Human-Gut	38	0	155.184	294	33	0	0	NA	59
./Human-Gut/pub/databases/metagenomics/mgnify_genomes/human-gut/v2.0/species_catalogue/MGYG0000035/MGYG000003577/genome/MGYG000003577.fna	0.113236	21	0	10.2857	25	1	89944.8	322842	4795	Human-Gut	38	0	141.105	241	16	0	0	NA	59
./Human-Gut/pub/databases/metagenomics/mgnify_genomes/human-gut/v2.0/species_catalogue/MGYG0000035/MGYG000003517/genome/MGYG000003517.fna	0.168592	20	0	10.6	19	2	137598	438532	3447	Human-Gut	39	0	146.846	260	14	0	0	NA	59
./Marine/ftp.ebi.ac.uk/pub/databases/metagenomics/mgnify_genomes/marine/v1.0/species_catalogue/MGYG0002962/MGYG000296241/genome/MGYG000296241.fna	0.110156	30	0	219.867	2586	14	52303.6	208739	71	Marine	28	0	110.308	211	6	0	0	NA	58
./Mouse-Gut/ftp.ebi.ac.uk/pub/databases/metagenomics/mgnify_genomes/mouse-gut/v1.0/species_catalogue/MGYG0003225/MGYG000322546/genome/MGYG000322546.fna	0.183782	29	0	13234.3	72476	11	12449.6	63928	1	Mouse-Gut	29	0	48	110	2	213.16	368	7	58
./Human-Gut/pub/databases/metagenomics/mgnify_genomes/human-gut/v2.0/species_catalogue/MGYG0000033/MGYG000003322/genome/MGYG000003322.fna	0.0976701	22	0	25.5	69	9	74820.3	211756	1819	Human-Gut	36	0	499.611	925	35	0	0	NA	58
./Human-Gut/pub/databases/metagenomics/mgnify_genomes/human-gut/v2.0/species_catalogue/MGYG0000027/MGYG000002777/genome/MGYG000002777.fna	0.0870664	15	0	6.06667	19	1	86493	532399	4177	Human-Gut	43	0	88.5349	165	2	0	0	NA	58
./Mouse-Gut/ftp.ebi.ac.uk/pub/databases/metagenomics/mgnify_genomes/mouse-gut/v1.0/species_catalogue/MGYG0003227/MGYG000322763/genome/MGYG000322763.fna	0.192053	31	0	122.419	2278	2	66186.6	639233	16	Mouse-Gut	26	0	122.577	261	3	91.6923	130	4	57
./Human-Gut/pub/databases/metagenomics/mgnify_genomes/human-gut/v2.0/species_catalogue/MGYG0000027/MGYG000002769/genome/MGYG000002769.fna	0.0857391	27	0	15.3704	50	6	45571.9	123755	3104	Human-Gut	30	0	156	399	9	0	0	NA	57
./Mouse-Gut/ftp.ebi.ac.uk/pub/databases/metagenomics/mgnify_genomes/mouse-gut/v1.0/species_catalogue/MGYG0003272/MGYG000327278/genome/MGYG000327278.fna	0.0806414	27	0	34.5926	41	21	45887.2	293665	2575	Mouse-Gut	30	0	59.5	102	7	0	0	NA	57
./Non-Model-Fish-Gut/ftp.ebi.ac.uk/pub/databases/metagenomics/mgnify_genomes/non-model-fish-gut/v2.0/species_catalogue/MGYG0002995/MGYG000299542/genome/MGYG000299542.fna	0.122108	25	0	26.04	39	1	71647.7	451348	1	Non-Model-Fish-Gut	32	0	139.156	289	8	0	0	NA	57
./Human-Gut/pub/databases/metagenomics/mgnify_genomes/human-gut/v2.0/species_catalogue/MGYG0000036/MGYG000003635/genome/MGYG000003635.fna	0.050764	30	0	9.86667	28	1	25961.8	86550	1262	Human-Gut	26	0	252.577	464	24	0	0	NA	56
./Human-Gut/pub/databases/metagenomics/mgnify_genomes/human-gut/v2.0/species_catalogue/MGYG0000034/MGYG000003492/genome/MGYG000003492.fna	0.105792	22	0	8.45455	18	1	71981.3	410465	3484	Human-Gut	34	0	343.235	666	13	0	0	NA	56
./Human-Gut/pub/databases/metagenomics/mgnify_genomes/human-gut/v2.0/species_catalogue/MGYG0000027/MGYG000002781/genome/MGYG000002781.fna	0.1173	22	0	8.40909	21	1	85173.7	504529	5540	Human-Gut	34	0	99.5	183	6	0	0	NA	56
./Human-Gut/pub/databases/metagenomics/mgnify_genomes/human-gut/v2.0/species_catalogue/MGYG0000036/MGYG000003630/genome/MGYG000003630.fna	0.114494	24	0	9.66667	20	2	76765.9	235091	1225	Human-Gut	31	0	242.323	474	3	0	0	NA	55
./Human-Gut/pub/databases/metagenomics/mgnify_genomes/human-gut/v2.0/species_catalogue/MGYG0000033/MGYG000003324/genome/MGYG000003324.fna	0.128936	35	0	18.9143	69	1	62063.2	327603	2001	Human-Gut	19	0	306.263	732	9	0	0	NA	54
./Mouse-Gut/ftp.ebi.ac.uk/pub/databases/metagenomics/mgnify_genomes/mouse-gut/v1.0/species_catalogue/MGYG0003282/MGYG000328221/genome/MGYG000328221.fna	0.124055	27	0	373.519	9440	3	74285.6	519359	2776	Mouse-Gut	27	0	128.593	253	3	0	0	NA	54
./Human-Gut/pub/databases/metagenomics/mgnify_genomes/human-gut/v2.0/species_catalogue/MGYG0000034/MGYG000003444/genome/MGYG000003444.fna	0.0894083	26	0	12.2692	27	1	57598.3	195382	2937	Human-Gut	27	0	173	313	10	0	0	NA	53
./Mouse-Gut/ftp.ebi.ac.uk/pub/databases/metagenomics/mgnify_genomes/mouse-gut/v1.0/species_catalogue/MGYG0003258/MGYG000325812/genome/MGYG000325812.fna	0.119523	26	0	31.5385	81	3	42567	304301	2619	Mouse-Gut	27	0	49.7778	98	4	0	0	NA	53
./Human-Gut/pub/databases/metagenomics/mgnify_genomes/human-gut/v2.0/species_catalogue/MGYG0000032/MGYG000003240/genome/MGYG000003240.fna	0.22831	23	0	12.6087	23	2	162640	788939	8187	Human-Gut	30	0	149.767	249	28	0	0	NA	53
./Mouse-Gut/ftp.ebi.ac.uk/pub/databases/metagenomics/mgnify_genomes/mouse-gut/v1.0/species_catalogue/MGYG0003282/MGYG000328203/genome/MGYG000328203.fna	0.129119	22	0	27.0909	40	1	91106.1	274051	3240	Mouse-Gut	31	0	153.968	317	8	0	0	NA	53
./Human-Gut/pub/databases/metagenomics/mgnify_genomes/human-gut/v2.0/species_catalogue/MGYG0000037/MGYG000003784/genome/MGYG000003784.fna	0.100753	21	0	15.2381	27	10	61226.9	273249	3990	Human-Gut	32	0	81.7188	161	13	0	0	NA	53
./Marine/ftp.ebi.ac.uk/pub/databases/metagenomics/mgnify_genomes/marine/v1.0/species_catalogue/MGYG0002966/MGYG000296615/genome/MGYG000296615.fna	0.151299	31	0	27.4516	57	5	74217.1	387769	6500	Marine	21	0	61.2857	126	10	0	0	NA	52
./Non-Model-Fish-Gut/ftp.ebi.ac.uk/pub/databases/metagenomics/mgnify_genomes/non-model-fish-gut/v2.0/species_catalogue/MGYG0002995/MGYG000299561/genome/MGYG000299561.fna	0.132166	30	0	31.7667	42	5	52836.1	274103	2794	Non-Model-Fish-Gut	22	0	95.6364	209	12	0	0	NA	52
./Human-Gut/pub/databases/metagenomics/mgnify_genomes/human-gut/v2.0/species_catalogue/MGYG0000004/MGYG000000468/genome/MGYG000000468.fna	0.174836	25	0	8.76	27	1	96614.4	507710	4424	Human-Gut	27	0	68.5556	156	4	0	0	NA	52
./Human-Gut/pub/databases/metagenomics/mgnify_genomes/human-gut/v2.0/species_catalogue/MGYG0000035/MGYG000003538/genome/MGYG000003538.fna	0.0871566	24	0	10.8333	23	1	59937.2	235168	4639	Human-Gut	28	0	124.036	275	14	0	0	NA	52
./Human-Gut/pub/databases/metagenomics/mgnify_genomes/human-gut/v2.0/species_catalogue/MGYG0000035/MGYG000003562/genome/MGYG000003562.fna	0.0612386	19	0	11.0526	22	1	50581.3	385556	2708	Human-Gut	33	0	241.091	417	42	0	0	NA	52
./Human-Gut/pub/databases/metagenomics/mgnify_genomes/human-gut/v2.0/species_catalogue/MGYG0000030/MGYG000003073/genome/MGYG000003073.fna	0.118147	29	0	196.793	4831	2	60402.7	372679	4831	Human-Gut	22	0	82.8182	152	25	0	0	NA	51
./Mouse-Gut/ftp.ebi.ac.uk/pub/databases/metagenomics/mgnify_genomes/mouse-gut/v1.0/species_catalogue/MGYG0003227/MGYG000322720/genome/MGYG000322720.fna	0.185373	28	0	1045.68	12872	1	40014.4	182346	13	Mouse-Gut	23	0	81.7391	165	4	205.231	337	34	51
./Human-Gut/pub/databases/metagenomics/mgnify_genomes/human-gut/v2.0/species_catalogue/MGYG0000016/MGYG000001681/genome/MGYG000001681.fna	0.152179	26	0	17.6154	34	3	60514.2	241878	5660	Human-Gut	25	0	211.04	376	3	0	0	NA	51
./Non-Model-Fish-Gut/ftp.ebi.ac.uk/pub/databases/metagenomics/mgnify_genomes/non-model-fish-gut/v2.0/species_catalogue/MGYG0002996/MGYG000299684/genome/MGYG000299684.fna	0.0773498	21	0	44.7619	167	12	50989	157448	7530	Non-Model-Fish-Gut	30	0	135.1	294	18	0	0	NA	51
./Human-Gut/pub/databases/metagenomics/mgnify_genomes/human-gut/v2.0/species_catalogue/MGYG0000035/MGYG000003557/genome/MGYG000003557.fna	0.0736453	20	0	5.45	16	1	57765.6	182557	10020	Human-Gut	31	0	235.065	510	4	0	0	NA	51
./Human-Gut/pub/databases/metagenomics/mgnify_genomes/human-gut/v2.0/species_catalogue/MGYG0000004/MGYG000000473/genome/MGYG000000473.fna	0.109764	23	0	10.6957	28	1	72960.5	319137	4054	Human-Gut	27	0	69.3704	153	7	0	0	NA	50
./Human-Gut/pub/databases/metagenomics/mgnify_genomes/human-gut/v2.0/species_catalogue/MGYG0000005/MGYG000000531/genome/MGYG000000531.fna	0.128145	20	0	6.85	25	1	84593.2	420395	2207	Human-Gut	30	0	51.5	103	3	0	0	NA	50
./Mouse-Gut/ftp.ebi.ac.uk/pub/databases/metagenomics/mgnify_genomes/mouse-gut/v1.0/species_catalogue/MGYG0003275/MGYG000327547/genome/MGYG000327547.fna	0.277265	29	0	1861.55	26549	21	144967	921800	2973	Mouse-Gut	20	0	149.6	281	6	0	0	NA	49
./Mouse-Gut/ftp.ebi.ac.uk/pub/databases/metagenomics/mgnify_genomes/mouse-gut/v1.0/species_catalogue/MGYG0003459/MGYG000345971/genome/MGYG000345971.fna	0.13436	24	0	1983.96	12717	3	17416.2	158309	0	Mouse-Gut	25	0	187.36	396	2	83.1667	130	4	49
./Human-Gut/pub/databases/metagenomics/mgnify_genomes/human-gut/v2.0/species_catalogue/MGYG0000039/MGYG000003909/genome/MGYG000003909.fna	0.139358	23	0	38.913	110	20	85971.2	288615	1722	Human-Gut	26	0	98.0385	172	7	0	0	NA	49
./Human-Gut/pub/databases/metagenomics/mgnify_genomes/human-gut/v2.0/species_catalogue/MGYG0000016/MGYG000001643/genome/MGYG000001643.fna	0.239084	23	0	359.391	8105	1	142733	580789	2639	Human-Gut	26	0	87.4231	203	4	0	0	NA	49
./Marine/ftp.ebi.ac.uk/pub/databases/metagenomics/mgnify_genomes/marine/v1.0/species_catalogue/MGYG0002967/MGYG000296787/genome/MGYG000296787.fna	0.0388195	23	0	213.87	2917	1	25874.6	88618	113	Marine	26	0	21	40	4	0	0	NA	49
./Marine/ftp.ebi.ac.uk/pub/databases/metagenomics/mgnify_genomes/marine/v1.0/species_catalogue/MGYG0002973/MGYG000297305/genome/MGYG000297305.fna	0.224259	26	0	1460.77	35995	5	125006	515776	109	Marine	22	0	39.5	85	3	0	0	NA	48
./Non-Model-Fish-Gut/ftp.ebi.ac.uk/pub/databases/metagenomics/mgnify_genomes/non-model-fish-gut/v2.0/species_catalogue/MGYG0002995/MGYG000299508/genome/MGYG000299508.fna	0.0756201	26	0	29.8846	41	2	42339.3	117680	4454	Non-Model-Fish-Gut	22	0	138.455	284	14	0	0	NA	48
./Pig-Gut/ftp.ebi.ac.uk/pub/databases/metagenomics/mgnify_genomes/pig-gut/v1.0/species_catalogue/MGYG0003032/MGYG000303239/genome/MGYG000303239.fna	0.091064	23	0	33.7391	37	22	58197.3	232048	3495	Pig-Gut	25	0	35.92	79	9	0	0	NA	48
./Human-Gut/pub/databases/metagenomics/mgnify_genomes/human-gut/v2.0/species_catalogue/MGYG0000015/MGYG000001573/genome/MGYG000001573.fna	0.0919532	23	0	8.91304	21	1	58589.2	507847	1535	Human-Gut	25	0	220.08	416	52	0	0	NA	48
./Mouse-Gut/ftp.ebi.ac.uk/pub/databases/metagenomics/mgnify_genomes/mouse-gut/v1.0/species_catalogue/MGYG0003273/MGYG000327384/genome/MGYG000327384.fna	0.1142	21	0	34.9524	38	30	63756.4	305949	5877	Mouse-Gut	27	0	67.4074	127	3	0	0	NA	48
./Mouse-Gut/ftp.ebi.ac.uk/pub/databases/metagenomics/mgnify_genomes/mouse-gut/v1.0/species_catalogue/MGYG0003272/MGYG000327249/genome/MGYG000327249.fna	0.245211	27	0	35.1111	40	29	145441	639464	5667	Mouse-Gut	20	0	224.7	405	12	0	0	NA	47
./Human-Gut/pub/databases/metagenomics/mgnify_genomes/human-gut/v2.0/species_catalogue/MGYG0000039/MGYG000003904/genome/MGYG000003904.fna	0.151222	26	0	35.4231	44	8	92068.7	330054	1549	Human-Gut	21	0	415.952	751	56	0	0	NA	47
./Human-Gut/pub/databases/metagenomics/mgnify_genomes/human-gut/v2.0/species_catalogue/MGYG0000016/MGYG000001666/genome/MGYG000001666.fna	0.168634	22	0	4.77273	16	1	116742	611086	4846	Human-Gut	25	0	113.2	264	3	0	0	NA	47
./Mouse-Gut/ftp.ebi.ac.uk/pub/databases/metagenomics/mgnify_genomes/mouse-gut/v1.0/species_catalogue/MGYG0003275/MGYG000327517/genome/MGYG000327517.fna	0.0927917	21	0	31.619	37	10	58272.2	425220	36	Mouse-Gut	26	0	126.692	234	12	0	0	NA	47
./Non-Model-Fish-Gut/ftp.ebi.ac.uk/pub/databases/metagenomics/mgnify_genomes/non-model-fish-gut/v2.0/species_catalogue/MGYG0002995/MGYG000299514/genome/MGYG000299514.fna	0.0799847	26	0	32.1154	40	13	47163.9	286190	3014	Non-Model-Fish-Gut	20	0	170.9	269	65	0	0	NA	46
./Human-Gut/pub/databases/metagenomics/mgnify_genomes/human-gut/v2.0/species_catalogue/MGYG0000036/MGYG000003619/genome/MGYG000003619.fna	0.161983	24	0	11.0417	31	1	102712	362403	3523	Human-Gut	22	0	117.682	242	3	0	0	NA	46
./Mouse-Gut/ftp.ebi.ac.uk/pub/databases/metagenomics/mgnify_genomes/mouse-gut/v1.0/species_catalogue/MGYG0003304/MGYG000330445/genome/MGYG000330445.fna	0.18851	24	0	126.542	2346	2	126806	505299	7939	Mouse-Gut	22	0	176.545	323	8	0	0	NA	46
./Human-Gut/pub/databases/metagenomics/mgnify_genomes/human-gut/v2.0/species_catalogue/MGYG0000035/MGYG000003501/genome/MGYG000003501.fna	0.128447	23	0	9.30435	19	3	90538.7	396002	7363	Human-Gut	23	0	148.652	287	5	0	0	NA	46
./Pig-Gut/ftp.ebi.ac.uk/pub/databases/metagenomics/mgnify_genomes/pig-gut/v1.0/species_catalogue/MGYG0003024/MGYG000302429/genome/MGYG000302429.fna	0.0951689	29	0	252.172	4103	3	53080	232793	2524	Pig-Gut	16	0	184.5	292	5	0	0	NA	45
./Non-Model-Fish-Gut/ftp.ebi.ac.uk/pub/databases/metagenomics/mgnify_genomes/non-model-fish-gut/v2.0/species_catalogue/MGYG0002995/MGYG000299558/genome/MGYG000299558.fna	0.105014	23	0	661.739	5574	3	75381.9	185731	15400	Non-Model-Fish-Gut	22	0	101.455	247	3	0	0	NA	45
./Human-Gut/pub/databases/metagenomics/mgnify_genomes/human-gut/v2.0/species_catalogue/MGYG0000032/MGYG000003204/genome/MGYG000003204.fna	0.164198	21	0	11.2857	22	2	102673	512083	2370	Human-Gut	24	0	174.458	341	6	0	0	NA	45
./Human-Gut/pub/databases/metagenomics/mgnify_genomes/human-gut/v2.0/species_catalogue/MGYG0000034/MGYG000003419/genome/MGYG000003419.fna	0.139042	20	0	9.6	21	1	106509	320522	4705	Human-Gut	25	0	147.08	272	6	0	0	NA	45
./Human-Gut/pub/databases/metagenomics/mgnify_genomes/human-gut/v2.0/species_catalogue/MGYG0000035/MGYG000003574/genome/MGYG000003574.fna	0.181442	18	0	15.9444	37	6	169584	622558	7416	Human-Gut	27	0	241.222	504	7	0	0	NA	45
./Human-Gut/pub/databases/metagenomics/mgnify_genomes/human-gut/v2.0/species_catalogue/MGYG0000031/MGYG000003196/genome/MGYG000003196.fna	0.134202	26	0	12.1538	27	3	71457.4	346567	2277	Human-Gut	18	0	58.6667	130	4	0	0	NA	44
./Human-Gut/pub/databases/metagenomics/mgnify_genomes/human-gut/v2.0/species_catalogue/MGYG0000010/MGYG000001017/genome/MGYG000001017.fna	0.104682	24	0	30.125	42	3	61706.9	187329	4266	Human-Gut	20	0	88.25	171	2	0	0	NA	44
./Human-Gut/pub/databases/metagenomics/mgnify_genomes/human-gut/v2.0/species_catalogue/MGYG0000005/MGYG000000518/genome/MGYG000000518.fna	0.095599	23	0	9.65217	28	2	61731.2	215527	2526	Human-Gut	21	0	54.1429	108	7	0	0	NA	44
./Human-Gut/pub/databases/metagenomics/mgnify_genomes/human-gut/v2.0/species_catalogue/MGYG0000036/MGYG000003603/genome/MGYG000003603.fna	0.113113	20	0	9.5	23	1	93667	411427	5693	Human-Gut	24	0	107.333	204	9	0	0	NA	44
./Human-Gut/pub/databases/metagenomics/mgnify_genomes/human-gut/v2.0/species_catalogue/MGYG0000036/MGYG000003600/genome/MGYG000003600.fna	0.0909398	19	0	12.9474	27	1	79676	181563	2579	Human-Gut	25	0	148.24	343	3	0	0	NA	44
./Pig-Gut/ftp.ebi.ac.uk/pub/databases/metagenomics/mgnify_genomes/pig-gut/v1.0/species_catalogue/MGYG0003033/MGYG000303303/genome/MGYG000303303.fna	0.135106	17	0	33.9412	37	32	127691	848067	3224	Pig-Gut	27	0	48.8148	117	5	0	0	NA	44
./Human-Gut/pub/databases/metagenomics/mgnify_genomes/human-gut/v2.0/species_catalogue/MGYG0000027/MGYG000002776/genome/MGYG000002776.fna	0.102459	16	0	21.8125	244	1	105623	383729	12927	Human-Gut	28	0	163.429	336	18	0	0	NA	44
./Human-Gut/pub/databases/metagenomics/mgnify_genomes/human-gut/v2.0/species_catalogue/MGYG0000034/MGYG000003471/genome/MGYG000003471.fna	0.071675	15	0	10.7333	19	2	72149.3	150551	6707	Human-Gut	29	0	88.931	183	2	0	0	NA	44
./Mouse-Gut/ftp.ebi.ac.uk/pub/databases/metagenomics/mgnify_genomes/mouse-gut/v1.0/species_catalogue/MGYG0003273/MGYG000327368/genome/MGYG000327368.fna	0.0569994	28	0	33.9286	43	9	30538	95735	36	Mouse-Gut	15	0	44.5333	104	2	0	0	NA	43
./Mouse-Gut/ftp.ebi.ac.uk/pub/databases/metagenomics/mgnify_genomes/mouse-gut/v1.0/species_catalogue/MGYG0003268/MGYG000326869/genome/MGYG000326869.fna	0.160672	26	0	31.8462	39	3	101666	345267	10649	Mouse-Gut	17	0	115.176	205	3	0	0	NA	43
./Human-Gut/pub/databases/metagenomics/mgnify_genomes/human-gut/v2.0/species_catalogue/MGYG0000035/MGYG000003523/genome/MGYG000003523.fna	0.0650679	24	0	13.7083	91	1	44016.6	132876	2616	Human-Gut	19	0	79.9474	177	3	0	0	NA	43
./Human-Gut/pub/databases/metagenomics/mgnify_genomes/human-gut/v2.0/species_catalogue/MGYG0000036/MGYG000003606/genome/MGYG000003606.fna	0.093308	21	0	10.7619	21	1	71045.5	170304	16975	Human-Gut	22	0	122.273	249	7	0	0	NA	43
./Pig-Gut/ftp.ebi.ac.uk/pub/databases/metagenomics/mgnify_genomes/pig-gut/v1.0/species_catalogue/MGYG0003019/MGYG000301942/genome/MGYG000301942.fna	0.114155	21	0	397.095	5856	1	84453.3	233524	12210	Pig-Gut	22	0	118.818	260	5	0	0	NA	43
./Human-Gut/pub/databases/metagenomics/mgnify_genomes/human-gut/v2.0/species_catalogue/MGYG0000036/MGYG000003625/genome/MGYG000003625.fna	0.146851	20	0	11.95	21	3	115372	403436	8649	Human-Gut	23	0	156.522	310	9	0	0	NA	43
./Human-Gut/pub/databases/metagenomics/mgnify_genomes/human-gut/v2.0/species_catalogue/MGYG0000017/MGYG000001759/genome/MGYG000001759.fna	0.124133	13	0	10	27	1	84737.9	523803	1709	Human-Gut	30	0	50.3333	89	3	0	0	NA	43
./Mouse-Gut/ftp.ebi.ac.uk/pub/databases/metagenomics/mgnify_genomes/mouse-gut/v1.0/species_catalogue/MGYG0003724/MGYG000372439/genome/MGYG000372439.fna	0.101822	25	0	1148.64	7003	1	18201.6	95318	7	Mouse-Gut	17	0	151.941	302	21	160.312	236	58	42
./Human-Gut/pub/databases/metagenomics/mgnify_genomes/human-gut/v2.0/species_catalogue/MGYG0000005/MGYG000000535/genome/MGYG000000535.fna	0.134012	21	0	9.80952	24	1	87686.2	252848	3310	Human-Gut	21	0	59.381	143	8	0	0	NA	42
./Human-Gut/pub/databases/metagenomics/mgnify_genomes/human-gut/v2.0/species_catalogue/MGYG0000034/MGYG000003427/genome/MGYG000003427.fna	0.201029	20	0	11.75	21	3	139503	470532	2253	Human-Gut	22	0	244.636	407	29	0	0	NA	42
./Mouse-Gut/ftp.ebi.ac.uk/pub/databases/metagenomics/mgnify_genomes/mouse-gut/v1.0/species_catalogue/MGYG0003654/MGYG000365455/genome/MGYG000365455.fna	0.109939	20	0	43.35	486	1	19393.2	55216	25	Mouse-Gut	22	0	203.364	411	20	127.923	229	52	42
./Human-Gut/pub/databases/metagenomics/mgnify_genomes/human-gut/v2.0/species_catalogue/MGYG0000037/MGYG000003748/genome/MGYG000003748.fna	0.0685293	19	0	13.5789	35	9	45797.8	195472	3185	Human-Gut	23	0	44.7391	104	3	0	0	NA	42
./Human-Gut/pub/databases/metagenomics/mgnify_genomes/human-gut/v2.0/species_catalogue/MGYG0000035/MGYG000003568/genome/MGYG000003568.fna	0.0792699	16	0	10.8125	27	2	78074	248431	4615	Human-Gut	26	0	105.923	196	23	0	0	NA	42
./Non-Model-Fish-Gut/ftp.ebi.ac.uk/pub/databases/metagenomics/mgnify_genomes/non-model-fish-gut/v2.0/species_catalogue/MGYG0002995/MGYG000299573/genome/MGYG000299573.fna	0.0700829	22	0	27.8182	38	1	45485.2	190313	2774	Non-Model-Fish-Gut	19	0	120.947	258	14	0	0	NA	41
./Human-Oral/ftp.ebi.ac.uk/pub/databases/metagenomics/mgnify_genomes/human-oral/v1.0/species_catalogue/MGYG0002987/MGYG000298726/genome/MGYG000298726.fna	0.080729	21	0	25.381	37	1	54321.1	213129	7327	Human-Oral	20	0	139.45	282	2	0	0	NA	41
./Human-Gut/pub/databases/metagenomics/mgnify_genomes/human-gut/v2.0/species_catalogue/MGYG0000004/MGYG000000462/genome/MGYG000000462.fna	0.108531	19	0	7	24	2	75998.6	296473	8577	Human-Gut	22	0	41.6364	79	3	0	0	NA	41
./Human-Gut/pub/databases/metagenomics/mgnify_genomes/human-gut/v2.0/species_catalogue/MGYG0000016/MGYG000001644/genome/MGYG000001644.fna	0.17256	19	0	1000	18824	1	143857	651130	1695	Human-Gut	21	0	92.9524	178	6	0	0	NA	40
./Human-Gut/pub/databases/metagenomics/mgnify_genomes/human-gut/v2.0/species_catalogue/MGYG0000034/MGYG000003414/genome/MGYG000003414.fna	0.100713	18	0	11.5556	26	1	93602.7	294619	7776	Human-Gut	22	0	149.682	321	24	0	0	NA	40
./Marine/ftp.ebi.ac.uk/pub/databases/metagenomics/mgnify_genomes/marine/v1.0/species_catalogue/MGYG0002974/MGYG000297412/genome/MGYG000297412.fna	0.0559545	18	0	109.944	169	23	49167.9	321638	2408	Marine	22	0	24.2273	44	6	0	0	NA	40
./Human-Gut/pub/databases/metagenomics/mgnify_genomes/human-gut/v2.0/species_catalogue/MGYG0000034/MGYG000003477/genome/MGYG000003477.fna	0.112568	14	0	9	14	1	116813	303169	13	Human-Gut	26	0	98.1923	192	11	0	0	NA	40
./Human-Gut/pub/databases/metagenomics/mgnify_genomes/human-gut/v2.0/species_catalogue/MGYG0000005/MGYG000000500/genome/MGYG000000500.fna	0.141725	22	0	1857.73	40653	1	101451	388004	3876	Human-Gut	17	0	81.6471	171	6	0	0	NA	39
./Human-Gut/pub/databases/metagenomics/mgnify_genomes/human-gut/v2.0/species_catalogue/MGYG0000036/MGYG000003602/genome/MGYG000003602.fna	0.0608365	21	0	14.7143	30	1	48176.8	132875	2068	Human-Gut	18	0	105.389	273	7	0	0	NA	39
./Human-Gut/pub/databases/metagenomics/mgnify_genomes/human-gut/v2.0/species_catalogue/MGYG0000034/MGYG000003442/genome/MGYG000003442.fna	0.130317	20	0	12.05	26	1	108246	343604	5496	Human-Gut	19	0	101.105	208	9	0	0	NA	39
./Mouse-Gut/ftp.ebi.ac.uk/pub/databases/metagenomics/mgnify_genomes/mouse-gut/v1.0/species_catalogue/MGYG0003555/MGYG000355517/genome/MGYG000355517.fna	0.0817711	19	0	3861.63	37000	1	9705.58	53635	0	Mouse-Gut	20	0	38.4706	75	2	141.2	202	4	39
./Non-Model-Fish-Gut/ftp.ebi.ac.uk/pub/databases/metagenomics/mgnify_genomes/non-model-fish-gut/v2.0/species_catalogue/MGYG0002995/MGYG000299515/genome/MGYG000299515.fna	0.0843577	19	0	29.8947	42	18	71202.8	344760	2786	Non-Model-Fish-Gut	20	0	115.05	254	5	0	0	NA	39
./Human-Oral/ftp.ebi.ac.uk/pub/databases/metagenomics/mgnify_genomes/human-oral/v1.0/species_catalogue/MGYG0002985/MGYG000298547/genome/MGYG000298547.fna	0.146635	18	0	16.2222	54	1	118532	419032	5681	Human-Oral	21	0	177.952	306	9	0	0	NA	39
./Human-Gut/pub/databases/metagenomics/mgnify_genomes/human-gut/v2.0/species_catalogue/MGYG0000016/MGYG000001674/genome/MGYG000001674.fna	0.0840771	16	0	1477.06	23407	2	88227.1	460676	6419	Human-Gut	23	0	98.5217	199	3	0	0	NA	39
./Non-Model-Fish-Gut/ftp.ebi.ac.uk/pub/databases/metagenomics/mgnify_genomes/non-model-fish-gut/v2.0/species_catalogue/MGYG0002996/MGYG000299694/genome/MGYG000299694.fna	0.16315	21	0	41.7619	124	33	121452	743543	2666	Non-Model-Fish-Gut	17	0	191.647	393	25	0	0	NA	38
./Marine/ftp.ebi.ac.uk/pub/databases/metagenomics/mgnify_genomes/marine/v1.0/species_catalogue/MGYG0002962/MGYG000296246/genome/MGYG000296246.fna	0.219696	21	0	18.3333	43	2	172785	891943	16359	Marine	17	0	279.824	528	48	0	0	NA	38
./Human-Gut/pub/databases/metagenomics/mgnify_genomes/human-gut/v2.0/species_catalogue/MGYG0000037/MGYG000003736/genome/MGYG000003736.fna	0.219308	20	0	14.2	33	0	125533	519468	0	Human-Gut	18	0	49.2778	102	3	0	0	NA	38
./Human-Gut/pub/databases/metagenomics/mgnify_genomes/human-gut/v2.0/species_catalogue/MGYG0000016/MGYG000001649/genome/MGYG000001649.fna	0.155201	18	0	7.72222	23	1	106766	408687	5	Human-Gut	20	0	75.4	147	2	0	0	NA	38
./Human-Gut/pub/databases/metagenomics/mgnify_genomes/human-gut/v2.0/species_catalogue/MGYG0000033/MGYG000003363/genome/MGYG000003363.fna	0.248887	17	0	529.118	8792	2	205853	1387396	8971	Human-Gut	21	0	94.6667	165	8	0	0	NA	38
./Non-Model-Fish-Gut/ftp.ebi.ac.uk/pub/databases/metagenomics/mgnify_genomes/non-model-fish-gut/v2.0/species_catalogue/MGYG0002995/MGYG000299524/genome/MGYG000299524.fna	0.114347	17	0	30	40	3	90807.5	334543	6567	Non-Model-Fish-Gut	21	0	168.905	314	21	0	0	NA	38
./Mouse-Gut/ftp.ebi.ac.uk/pub/databases/metagenomics/mgnify_genomes/mouse-gut/v1.0/species_catalogue/MGYG0003409/MGYG000340909/genome/MGYG000340909.fna	0.094645	16	0	21.875	38	5	36552.7	166222	544	Mouse-Gut	22	0	204.273	447	34	83.5	130	19	38
./Human-Gut/pub/databases/metagenomics/mgnify_genomes/human-gut/v2.0/species_catalogue/MGYG0000034/MGYG000003425/genome/MGYG000003425.fna	0.300999	20	0	10.05	19	2	247173	788274	1644	Human-Gut	17	0	293.824	534	93	0	0	NA	37
./Human-Gut/pub/databases/metagenomics/mgnify_genomes/human-gut/v2.0/species_catalogue/MGYG0000016/MGYG000001654/genome/MGYG000001654.fna	0.16064	18	0	18.7778	39	2	131334	737873	5654	Human-Gut	19	0	171.474	272	17	0	0	NA	37
./Mouse-Gut/ftp.ebi.ac.uk/pub/databases/metagenomics/mgnify_genomes/mouse-gut/v1.0/species_catalogue/MGYG0003271/MGYG000327130/genome/MGYG000327130.fna	0.0723681	16	0	39.5	73	32	62690.4	252812	5567	Mouse-Gut	21	0	82.5238	181	4	0	0	NA	37
./Human-Gut/pub/databases/metagenomics/mgnify_genomes/human-gut/v2.0/species_catalogue/MGYG0000035/MGYG000003544/genome/MGYG000003544.fna	0.0942789	16	0	9.375	18	1	93058.2	397648	4284	Human-Gut	21	0	104.667	171	3	0	0	NA	37
./Human-Gut/pub/databases/metagenomics/mgnify_genomes/human-gut/v2.0/species_catalogue/MGYG0000034/MGYG000003420/genome/MGYG000003420.fna	0.135019	12	0	390.75	4523	2	171665	362899	18800	Human-Gut	25	0	122.36	223	2	0	0	NA	37
./Mouse-Gut/ftp.ebi.ac.uk/pub/databases/metagenomics/mgnify_genomes/mouse-gut/v1.0/species_catalogue/MGYG0004061/MGYG000406156/genome/MGYG000406156.fna	0.136788	22	0	14.8636	40	2	103158	574303	5	Mouse-Gut	14	0	180.429	341	8	0	0	NA	36
./Pig-Gut/ftp.ebi.ac.uk/pub/databases/metagenomics/mgnify_genomes/pig-gut/v1.0/species_catalogue/MGYG0003032/MGYG000303213/genome/MGYG000303213.fna	0.160592	22	0	1265.82	27098	31	76581.7	367364	3460	Pig-Gut	14	0	61.3571	108	18	0	0	NA	36
./Marine/ftp.ebi.ac.uk/pub/databases/metagenomics/mgnify_genomes/marine/v1.0/species_catalogue/MGYG0002971/MGYG000297157/genome/MGYG000297157.fna	0.125889	18	0	130.722	964	11	103744	600267	69	Marine	18	0	32.5556	63	5	0	0	NA	36
./Pig-Gut/ftp.ebi.ac.uk/pub/databases/metagenomics/mgnify_genomes/pig-gut/v1.0/species_catalogue/MGYG0003033/MGYG000303310/genome/MGYG000303310.fna	0.124049	16	0	32.8125	39	12	114900	474569	2564	Pig-Gut	20	0	157.7	298	26	0	0	NA	36
./Human-Gut/pub/databases/metagenomics/mgnify_genomes/human-gut/v2.0/species_catalogue/MGYG0000016/MGYG000001653/genome/MGYG000001653.fna	0.115322	16	0	17.9375	34	2	90290.4	293337	3246	Human-Gut	20	0	92.45	181	21	0	0	NA	36
./Human-Gut/pub/databases/metagenomics/mgnify_genomes/human-gut/v2.0/species_catalogue/MGYG0000029/MGYG000002995/genome/MGYG000002995.fna	0.281226	15	0	42.5333	65	4	308405	1332049	30866	Human-Gut	21	0	92.619	192	5	0	0	NA	36
./Mouse-Gut/ftp.ebi.ac.uk/pub/databases/metagenomics/mgnify_genomes/mouse-gut/v1.0/species_catalogue/MGYG0003243/MGYG000324334/genome/MGYG000324334.fna	0.134812	14	0	237.143	2992	2	92423.1	276194	8985	Mouse-Gut	22	0	161.591	265	28	0	0	NA	36
./Mouse-Gut/ftp.ebi.ac.uk/pub/databases/metagenomics/mgnify_genomes/mouse-gut/v1.0/species_catalogue/MGYG0003243/MGYG000324324/genome/MGYG000324324.fna	0.224972	13	0	21.1538	39	1	232906	739114	11501	Mouse-Gut	23	0	219.565	535	23	0	0	NA	36
./Human-Gut/pub/databases/metagenomics/mgnify_genomes/human-gut/v2.0/species_catalogue/MGYG0000037/MGYG000003761/genome/MGYG000003761.fna	0.281275	26	0	736.731	18757	3	133706	507314	4756	Human-Gut	9	2.35842e-11	121	257	15	0	0	NA	35
./Human-Gut/pub/databases/metagenomics/mgnify_genomes/human-gut/v2.0/species_catalogue/MGYG0000037/MGYG000003788/genome/MGYG000003788.fna	0.115261	18	0	900.278	15922	11	90988.7	300706	662	Human-Gut	17	0	62.3529	119	2	0	0	NA	35
./Human-Gut/pub/databases/metagenomics/mgnify_genomes/human-gut/v2.0/species_catalogue/MGYG0000036/MGYG000003632/genome/MGYG000003632.fna	0.112898	17	0	11.5294	31	3	107471	326779	6999	Human-Gut	18	0	137.833	312	11	0	0	NA	35
./Non-Model-Fish-Gut/ftp.ebi.ac.uk/pub/databases/metagenomics/mgnify_genomes/non-model-fish-gut/v2.0/species_catalogue/MGYG0002995/MGYG000299549/genome/MGYG000299549.fna	0.158858	16	0	740.375	11363	9	141654	418725	8439	Non-Model-Fish-Gut	19	0	156.316	264	34	0	0	NA	35
./Marine/ftp.ebi.ac.uk/pub/databases/metagenomics/mgnify_genomes/marine/v1.0/species_catalogue/MGYG0002974/MGYG000297472/genome/MGYG000297472.fna	0.103914	14	0	79.0714	163	6	95605.7	376036	78	Marine	21	0	50.1905	94	7	0	0	NA	35
./Human-Gut/pub/databases/metagenomics/mgnify_genomes/human-gut/v2.0/species_catalogue/MGYG0000036/MGYG000003631/genome/MGYG000003631.fna	0.0988259	11	0	8.63636	20	1	151109	436835	23536	Human-Gut	24	0	291.792	477	34	0	0	NA	35
./Human-Gut/pub/databases/metagenomics/mgnify_genomes/human-gut/v2.0/species_catalogue/MGYG0000016/MGYG000001658/genome/MGYG000001658.fna	0.161682	20	0	15.55	39	3	123405	827997	4	Human-Gut	14	0	114.929	209	3	0	0	NA	34
./Mouse-Gut/ftp.ebi.ac.uk/pub/databases/metagenomics/mgnify_genomes/mouse-gut/v1.0/species_catalogue/MGYG0003313/MGYG000331361/genome/MGYG000331361.fna	0.168336	18	0	23.1667	41	2	153508	740767	3178	Mouse-Gut	16	0	159.625	348	36	0	0	NA	34
./Human-Gut/pub/databases/metagenomics/mgnify_genomes/human-gut/v2.0/species_catalogue/MGYG0000029/MGYG000002901/genome/MGYG000002901.fna	0.0690964	17	0	28.5882	37	1	62494.9	223934	10804	Human-Gut	17	0	170.294	263	11	0	0	NA	34
./Human-Gut/pub/databases/metagenomics/mgnify_genomes/human-gut/v2.0/species_catalogue/MGYG0000033/MGYG000003396/genome/MGYG000003396.fna	0.233894	12	0	13.1667	23	7	326537	1254053	76379	Human-Gut	22	0	107.909	180	16	0	0	NA	34
./Human-Gut/pub/databases/metagenomics/mgnify_genomes/human-gut/v2.0/species_catalogue/MGYG0000034/MGYG000003455/genome/MGYG000003455.fna	0.0733209	10	0	11.6	25	2	116393	271120	10462	Human-Gut	24	0	97.8333	160	3	0	0	NA	34
./Human-Gut/pub/databases/metagenomics/mgnify_genomes/human-gut/v2.0/species_catalogue/MGYG0000038/MGYG000003803/genome/MGYG000003803.fna	0.227099	21	0	8.47619	18	1	152894	981808	2	Human-Gut	12	0	367.75	690	32	0	0	NA	33
./Human-Gut/pub/databases/metagenomics/mgnify_genomes/human-gut/v2.0/species_catalogue/MGYG0000037/MGYG000003724/genome/MGYG000003724.fna	0.0876099	19	0	14.6842	28	10	66680.5	157115	4850	Human-Gut	14	0	85	206	7	0	0	NA	33
./Mouse-Gut/ftp.ebi.ac.uk/pub/databases/metagenomics/mgnify_genomes/mouse-gut/v1.0/species_catalogue/MGYG0003275/MGYG000327533/genome/MGYG000327533.fna	0.205236	17	0	33.3529	36	21	163751	803530	6022	Mouse-Gut	16	0	134.312	262	31	0	0	NA	33
./Human-Gut/pub/databases/metagenomics/mgnify_genomes/human-gut/v2.0/species_catalogue/MGYG0000035/MGYG000003575/genome/MGYG000003575.fna	0.139686	12	0	11.4167	24	2	186132	439102	25309	Human-Gut	21	0	108.667	230	8	0	0	NA	33
./Human-Gut/pub/databases/metagenomics/mgnify_genomes/human-gut/v2.0/species_catalogue/MGYG0000036/MGYG000003608/genome/MGYG000003608.fna	0.0826848	12	0	9.91667	23	1	114237	419409	9305	Human-Gut	21	0	109.429	221	15	0	0	NA	33
./Human-Gut/pub/databases/metagenomics/mgnify_genomes/human-gut/v2.0/species_catalogue/MGYG0000032/MGYG000003229/genome/MGYG000003229.fna	0.104784	19	0	11.6842	28	2	83806	270755	4520	Human-Gut	13	0	94.6154	222	11	0	0	NA	32
./Human-Gut/pub/databases/metagenomics/mgnify_genomes/human-gut/v2.0/species_catalogue/MGYG0000035/MGYG000003553/genome/MGYG000003553.fna	0.138214	19	0	8.31579	20	1	90508.8	190680	6764	Human-Gut	13	0	140.077	261	14	0	0	NA	32
./Mouse-Gut/ftp.ebi.ac.uk/pub/databases/metagenomics/mgnify_genomes/mouse-gut/v1.0/species_catalogue/MGYG0003271/MGYG000327196/genome/MGYG000327196.fna	0.191505	19	0	4551.32	85856	26	153270	1274245	6188	Mouse-Gut	13	0	62.9231	110	3	0	0	NA	32
./Human-Gut/pub/databases/metagenomics/mgnify_genomes/human-gut/v2.0/species_catalogue/MGYG0000016/MGYG000001671/genome/MGYG000001671.fna	0.196696	15	0	396.2	5712	2	143359	698747	332	Human-Gut	17	0	113.941	273	11	0	0	NA	32
./Human-Gut/pub/databases/metagenomics/mgnify_genomes/human-gut/v2.0/species_catalogue/MGYG0000035/MGYG000003555/genome/MGYG000003555.fna	0.0688816	15	0	9	17	1	75736.5	187467	9657	Human-Gut	17	0	89.9412	176	13	0	0	NA	32
./Non-Model-Fish-Gut/ftp.ebi.ac.uk/pub/databases/metagenomics/mgnify_genomes/non-model-fish-gut/v2.0/species_catalogue/MGYG0002995/MGYG000299517/genome/MGYG000299517.fna	0.0898519	13	0	27.4615	38	4	91695.6	355319	3570	Non-Model-Fish-Gut	19	0	140.526	230	37	0	0	NA	32
./Human-Gut/pub/databases/metagenomics/mgnify_genomes/human-gut/v2.0/species_catalogue/MGYG0000037/MGYG000003765/genome/MGYG000003765.fna	0.138515	16	0	531.188	8343	1	129703	442445	11663	Human-Gut	15	0	212.733	456	89	0	0	NA	31
./Human-Gut/pub/databases/metagenomics/mgnify_genomes/human-gut/v2.0/species_catalogue/MGYG0000016/MGYG000001656/genome/MGYG000001656.fna	0.116863	13	0	19.7692	39	2	118613	383022	8119	Human-Gut	18	0	154.667	246	19	0	0	NA	31
./Human-Gut/pub/databases/metagenomics/mgnify_genomes/human-gut/v2.0/species_catalogue/MGYG0000005/MGYG000000520/genome/MGYG000000520.fna	0.111222	13	0	12.3846	30	2	122076	878439	1584	Human-Gut	18	0	38.1667	79	4	0	0	NA	31
./Human-Gut/pub/databases/metagenomics/mgnify_genomes/human-gut/v2.0/species_catalogue/MGYG0000038/MGYG000003812/genome/MGYG000003812.fna	0.138016	23	0	15.2174	33	2	89210.4	510361	2	Human-Gut	7	1.67757e-10	58	100	24	0	0	NA	30
./Mouse-Gut/ftp.ebi.ac.uk/pub/databases/metagenomics/mgnify_genomes/mouse-gut/v1.0/species_catalogue/MGYG0003666/MGYG000366673/genome/MGYG000366673.fna	0.0868579	21	0	947.857	9503	1	21815	93147	1	Mouse-Gut	9	6.66134e-16	139.333	233	4	218.125	295	46	30
./Mouse-Gut/ftp.ebi.ac.uk/pub/databases/metagenomics/mgnify_genomes/mouse-gut/v1.0/species_catalogue/MGYG0003240/MGYG000324065/genome/MGYG000324065.fna	0.178573	17	0	33.5882	39	21	155092	1036699	35	Mouse-Gut	13	0	52.0769	86	4	0	0	NA	30
./Human-Gut/pub/databases/metagenomics/mgnify_genomes/human-gut/v2.0/species_catalogue/MGYG0000005/MGYG000000530/genome/MGYG000000530.fna	0.116563	16	0	1390.19	22152	1	105817	397092	4344	Human-Gut	14	0	46.1429	73	18	0	0	NA	30
./Human-Gut/pub/databases/metagenomics/mgnify_genomes/human-gut/v2.0/species_catalogue/MGYG0000033/MGYG000003309/genome/MGYG000003309.fna	0.0986745	16	0	41.0625	66	10	84857.5	237915	6228	Human-Gut	14	0	122.357	197	14	0	0	NA	30
./Human-Gut/pub/databases/metagenomics/mgnify_genomes/human-gut/v2.0/species_catalogue/MGYG0000037/MGYG000003734/genome/MGYG000003734.fna	0.312086	16	0	22.3125	140	11	262282	1510393	16964	Human-Gut	14	0	76.0714	172	3	0	0	NA	30
./Mouse-Gut/ftp.ebi.ac.uk/pub/databases/metagenomics/mgnify_genomes/mouse-gut/v1.0/species_catalogue/MGYG0003227/MGYG000322726/genome/MGYG000322726.fna	0.195259	19	0	8234.42	132717	5	40322.7	238849	3	Mouse-Gut	10	1.85407e-14	83.7	227	2	156.667	286	4	29
./Human-Gut/pub/databases/metagenomics/mgnify_genomes/human-gut/v2.0/species_catalogue/MGYG0000035/MGYG000003548/genome/MGYG000003548.fna	0.136492	16	0	13.125	21	3	137876	407075	15	Human-Gut	13	0	92.7692	147	6	0	0	NA	29
./Human-Gut/pub/databases/metagenomics/mgnify_genomes/human-gut/v2.0/species_catalogue/MGYG0000035/MGYG000003556/genome/MGYG000003556.fna	0.126863	16	0	10.875	25	1	126239	460979	4957	Human-Gut	13	0	71.9231	214	13	0	0	NA	29
./Mouse-Gut/ftp.ebi.ac.uk/pub/databases/metagenomics/mgnify_genomes/mouse-gut/v1.0/species_catalogue/MGYG0003305/MGYG000330586/genome/MGYG000330586.fna	0.199246	15	0	24.4	57	2	212416	1296231	2599	Mouse-Gut	14	0	136.143	285	9	0	0	NA	29
./Human-Gut/pub/databases/metagenomics/mgnify_genomes/human-gut/v2.0/species_catalogue/MGYG0000032/MGYG000003271/genome/MGYG000003271.fna	0.0840943	14	0	12.2857	58	1	95995.9	212659	5954	Human-Gut	15	0	342.867	705	27	0	0	NA	29
./Human-Gut/pub/databases/metagenomics/mgnify_genomes/human-gut/v2.0/species_catalogue/MGYG0000016/MGYG000001642/genome/MGYG000001642.fna	0.118951	13	0	11.9231	23	4	149526	467386	12414	Human-Gut	16	0	76.125	141	2	0	0	NA	29
./Mouse-Gut/ftp.ebi.ac.uk/pub/databases/metagenomics/mgnify_genomes/mouse-gut/v1.0/species_catalogue/MGYG0003494/MGYG000349464/genome/MGYG000349464.fna	0.16273	12	0	9.83333	18	4	213977	667677	28513	Mouse-Gut	17	0	230.765	396	63	0	0	NA	29
./Mouse-Gut/ftp.ebi.ac.uk/pub/databases/metagenomics/mgnify_genomes/mouse-gut/v1.0/species_catalogue/MGYG0003457/MGYG000345714/genome/MGYG000345714.fna	0.164662	12	0	31.25	58	5	186362	445603	2320	Mouse-Gut	17	0	60.4706	110	6	0	0	NA	29
./Human-Gut/pub/databases/metagenomics/mgnify_genomes/human-gut/v2.0/species_catalogue/MGYG0000032/MGYG000003203/genome/MGYG000003203.fna	0.317578	17	0	10.5882	44	1	248410	879089	7	Human-Gut	11	6.20615e-14	277.455	490	106	0	0	NA	28
./Mouse-Gut/ftp.ebi.ac.uk/pub/databases/metagenomics/mgnify_genomes/mouse-gut/v1.0/species_catalogue/MGYG0003307/MGYG000330705/genome/MGYG000330705.fna	0.114508	16	0	26.9375	48	1	111785	464418	6009	Mouse-Gut	12	0	131.636	252	22	0	0	NA	28
./Human-Gut/pub/databases/metagenomics/mgnify_genomes/human-gut/v2.0/species_catalogue/MGYG0000038/MGYG000003807/genome/MGYG000003807.fna	0.0753186	15	0	187.8	2611	9	66842.1	327367	12	Human-Gut	13	0	60.4615	135	4	0	0	NA	28
./Human-Gut/pub/databases/metagenomics/mgnify_genomes/human-gut/v2.0/species_catalogue/MGYG0000032/MGYG000003207/genome/MGYG000003207.fna	0.11087	14	0	7.71429	13	2	111745	375646	1127	Human-Gut	14	0	346.143	627	4	0	0	NA	28
./Mouse-Gut/ftp.ebi.ac.uk/pub/databases/metagenomics/mgnify_genomes/mouse-gut/v1.0/species_catalogue/MGYG0003220/MGYG000322033/genome/MGYG000322033.fna	0.146092	13	0	613.769	7555	7	94809.1	405313	25	Mouse-Gut	15	0	56.9333	118	4	10	16	4	28
./Human-Gut/pub/databases/metagenomics/mgnify_genomes/human-gut/v2.0/species_catalogue/MGYG0000031/MGYG000003195/genome/MGYG000003195.fna	0.0999268	13	0	11.5385	24	2	110389	490073	6463	Human-Gut	15	0	28.0667	44	2	0	0	NA	28
./Mouse-Gut/ftp.ebi.ac.uk/pub/databases/metagenomics/mgnify_genomes/mouse-gut/v1.0/species_catalogue/MGYG0003225/MGYG000322557/genome/MGYG000322557.fna	0.0899468	19	0	6455.26	32115	2	18814.6	117744	3	Mouse-Gut	8	9.81437e-14	18.2857	38	2	54.25	124	4	27
./Human-Gut/pub/databases/metagenomics/mgnify_genomes/human-gut/v2.0/species_catalogue/MGYG0000028/MGYG000002888/genome/MGYG000002888.fna	0.147767	16	0	274.875	3994	5	127285	888521	2140	Human-Gut	11	0	51.0909	96	5	0	0	NA	27
./Mouse-Gut/ftp.ebi.ac.uk/pub/databases/metagenomics/mgnify_genomes/mouse-gut/v1.0/species_catalogue/MGYG0003376/MGYG000337677/genome/MGYG000337677.fna	0.0564948	15	0	39.8667	282	2	13350.2	66114	6	Mouse-Gut	12	0	118.5	259	2	116.667	184	52	27
./Marine/ftp.ebi.ac.uk/pub/databases/metagenomics/mgnify_genomes/marine/v1.0/species_catalogue/MGYG0002971/MGYG000297127/genome/MGYG000297127.fna	0.128394	15	0	15.4	59	3	122423	443382	6179	Marine	12	0	176	308	21	0	0	NA	27
./Marine/ftp.ebi.ac.uk/pub/databases/metagenomics/mgnify_genomes/marine/v1.0/species_catalogue/MGYG0002963/MGYG000296361/genome/MGYG000296361.fna	0.16118	14	0	15	42	2	161604	1279511	2405	Marine	13	0	160.462	300	7	0	0	NA	27
./Marine/ftp.ebi.ac.uk/pub/databases/metagenomics/mgnify_genomes/marine/v1.0/species_catalogue/MGYG0002973/MGYG000297392/genome/MGYG000297392.fna	0.112065	14	0	3735.14	50984	19	86899.5	283390	67	Marine	13	0	38.6923	68	7	0	0	NA	27
./Mouse-Gut/ftp.ebi.ac.uk/pub/databases/metagenomics/mgnify_genomes/mouse-gut/v1.0/species_catalogue/MGYG0003269/MGYG000326933/genome/MGYG000326933.fna	0.239303	13	0	27.6923	43	1	264888	1133734	35	Mouse-Gut	14	0	58.3571	96	3	0	0	NA	27
./Human-Gut/pub/databases/metagenomics/mgnify_genomes/human-gut/v2.0/species_catalogue/MGYG0000028/MGYG000002844/genome/MGYG000002844.fna	0.130998	12	0	35.5	44	15	119382	437148	6932	Human-Gut	15	0	45.1333	68	10	0	0	NA	27
./Human-Gut/pub/databases/metagenomics/mgnify_genomes/human-gut/v2.0/species_catalogue/MGYG0000005/MGYG000000539/genome/MGYG000000539.fna	0.137266	12	0	11.3333	21	2	146274	630814	4543	Human-Gut	14	0	57.1429	90	19	0	0	NA	26
./Human-Gut/pub/databases/metagenomics/mgnify_genomes/human-gut/v2.0/species_catalogue/MGYG0000032/MGYG000003215/genome/MGYG000003215.fna	0.158074	11	0	17.2727	56	2	241404	594722	37379	Human-Gut	15	0	168.867	263	5	0	0	NA	26
./Human-Gut/pub/databases/metagenomics/mgnify_genomes/human-gut/v2.0/species_catalogue/MGYG0000035/MGYG000003571/genome/MGYG000003571.fna	0.0917956	11	0	10.6364	19	4	129626	346962	5122	Human-Gut	15	0	94.2	190	26	0	0	NA	26
./Marine/ftp.ebi.ac.uk/pub/databases/metagenomics/mgnify_genomes/marine/v1.0/species_catalogue/MGYG0002960/MGYG000296014/genome/MGYG000296014.fna	0.10213	11	0	2736.27	29168	34	96513.5	427936	96	Marine	15	0	25.8571	48	2	0	0	NA	26
./Human-Gut/pub/databases/metagenomics/mgnify_genomes/human-gut/v2.0/species_catalogue/MGYG0000036/MGYG000003601/genome/MGYG000003601.fna	0.082874	10	0	13.9	22	5	136082	465418	2694	Human-Gut	16	0	62.3125	107	9	0	0	NA	26
./Human-Gut/pub/databases/metagenomics/mgnify_genomes/human-gut/v2.0/species_catalogue/MGYG0000016/MGYG000001668/genome/MGYG000001668.fna	0.112185	16	0	5.875	16	1	113332	593903	13266	Human-Gut	9	6.99441e-15	181.222	273	53	0	0	NA	25
./Mouse-Gut/ftp.ebi.ac.uk/pub/databases/metagenomics/mgnify_genomes/mouse-gut/v1.0/species_catalogue/MGYG0003269/MGYG000326902/genome/MGYG000326902.fna	0.0476022	16	0	26.1875	38	1	41670.1	137969	4627	Mouse-Gut	9	0	61.2222	93	7	0	0	NA	25
./Human-Gut/pub/databases/metagenomics/mgnify_genomes/human-gut/v2.0/species_catalogue/MGYG0000030/MGYG000003071/genome/MGYG000003071.fna	0.0801525	14	0	43.8571	140	1	82669.4	237351	8542	Human-Gut	11	0	149.182	305	20	0	0	NA	25
./Human-Gut/pub/databases/metagenomics/mgnify_genomes/human-gut/v2.0/species_catalogue/MGYG0000028/MGYG000002885/genome/MGYG000002885.fna	0.18725	12	0	27.25	35	1	216283	1261447	25750	Human-Gut	13	0	315.615	594	6	0	0	NA	25
./Mouse-Gut/ftp.ebi.ac.uk/pub/databases/metagenomics/mgnify_genomes/mouse-gut/v1.0/species_catalogue/MGYG0003313/MGYG000331372/genome/MGYG000331372.fna	0.145778	12	0	27.4167	39	2	180708	464366	18987	Mouse-Gut	13	0	126	272	3	0	0	NA	25
./Human-Gut/pub/databases/metagenomics/mgnify_genomes/human-gut/v2.0/species_catalogue/MGYG0000029/MGYG000002952/genome/MGYG000002952.fna	0.0643029	12	0	20.75	61	2	89018.8	511110	2618	Human-Gut	13	0	132.615	214	15	0	0	NA	25
./Human-Gut/pub/databases/metagenomics/mgnify_genomes/human-gut/v2.0/species_catalogue/MGYG0000036/MGYG000003609/genome/MGYG000003609.fna	0.0637466	12	0	9.83333	24	2	80993.2	239545	8	Human-Gut	13	0	59.9231	113	3	0	0	NA	25
./Mouse-Gut/ftp.ebi.ac.uk/pub/databases/metagenomics/mgnify_genomes/mouse-gut/v1.0/species_catalogue/MGYG0003282/MGYG000328222/genome/MGYG000328222.fna	0.116993	11	0	28.2727	37	10	134122	634079	14396	Mouse-Gut	14	0	111.286	234	6	0	0	NA	25
./Non-Model-Fish-Gut/ftp.ebi.ac.uk/pub/databases/metagenomics/mgnify_genomes/non-model-fish-gut/v2.0/species_catalogue/MGYG0002995/MGYG000299572/genome/MGYG000299572.fna	0.0381632	10	0	21.8	37	1	60527.5	183789	10385	Non-Model-Fish-Gut	15	0	61.6667	110	2	0	0	NA	25
./Human-Oral/ftp.ebi.ac.uk/pub/databases/metagenomics/mgnify_genomes/human-oral/v1.0/species_catalogue/MGYG0002982/MGYG000298200/genome/MGYG000298200.fna	0.110065	14	0	19.2143	36	5	98939.4	872170	2649	Human-Oral	10	1.11022e-16	47.6	96	6	0	0	NA	24
./Human-Gut/pub/databases/metagenomics/mgnify_genomes/human-gut/v2.0/species_catalogue/MGYG0000027/MGYG000002772/genome/MGYG000002772.fna	0.173942	12	0	30.9167	88	11	223306	556927	13518	Human-Gut	12	0	239.333	600	91	0	0	NA	24
./Human-Gut/pub/databases/metagenomics/mgnify_genomes/human-gut/v2.0/species_catalogue/MGYG0000035/MGYG000003554/genome/MGYG000003554.fna	0.118078	11	0	8.27273	13	1	161435	335904	20917	Human-Gut	12	0	115.417	207	15	0	0	NA	23
./Human-Gut/pub/databases/metagenomics/mgnify_genomes/human-gut/v2.0/species_catalogue/MGYG0000034/MGYG000003485/genome/MGYG000003485.fna	0.077556	11	0	7.18182	13	2	85106.2	247662	28059	Human-Gut	12	0	77.5	126	9	0	0	NA	23
./Human-Gut/pub/databases/metagenomics/mgnify_genomes/human-gut/v2.0/species_catalogue/MGYG0000035/MGYG000003529/genome/MGYG000003529.fna	0.0988002	11	0	10.5455	18	2	143853	305073	73047	Human-Gut	12	0	35.75	55	7	0	0	NA	23
./Human-Gut/pub/databases/metagenomics/mgnify_genomes/human-gut/v2.0/species_catalogue/MGYG0000038/MGYG000003805/genome/MGYG000003805.fna	0.125556	17	0	117.176	1759	3	122312	386387	4999	Human-Gut	5	2.34227e-07	195.8	328	36	0	0	NA	22
./Pig-Gut/ftp.ebi.ac.uk/pub/databases/metagenomics/mgnify_genomes/pig-gut/v1.0/species_catalogue/MGYG0003033/MGYG000303340/genome/MGYG000303340.fna	0.101649	13	0	33	39	15	120689	657661	14827	Pig-Gut	9	2.88658e-15	97.1111	188	9	0	0	NA	22
./Mouse-Gut/ftp.ebi.ac.uk/pub/databases/metagenomics/mgnify_genomes/mouse-gut/v1.0/species_catalogue/MGYG0003362/MGYG000336229/genome/MGYG000336229.fna	0.0788277	13	0	29	39	8	12725.2	24171	2005	Mouse-Gut	9	3.33067e-16	107.667	214	22	242.667	316	154	22
./Human-Gut/pub/databases/metagenomics/mgnify_genomes/human-gut/v2.0/species_catalogue/MGYG0000032/MGYG000003268/genome/MGYG000003268.fna	0.14686	11	0	22.7273	57	2	214408	410882	3825	Human-Gut	11	0	125.273	258	18	0	0	NA	22
./Human-Gut/pub/databases/metagenomics/mgnify_genomes/human-gut/v2.0/species_catalogue/MGYG0000004/MGYG000000494/genome/MGYG000000494.fna	0.0896313	11	0	10.2727	22	2	90389.2	254727	17088	Human-Gut	11	0	36.1818	64	2	0	0	NA	22
./Human-Gut/pub/databases/metagenomics/mgnify_genomes/human-gut/v2.0/species_catalogue/MGYG0000034/MGYG000003468/genome/MGYG000003468.fna	0.0542539	13	0	15	27	2	65279.1	175472	7668	Human-Gut	8	1.77636e-15	55.875	87	8	0	0	NA	21
./Marine/ftp.ebi.ac.uk/pub/databases/metagenomics/mgnify_genomes/marine/v1.0/species_catalogue/MGYG0002962/MGYG000296285/genome/MGYG000296285.fna	0.143848	12	0	15.3333	44	3	157336	638068	12609	Marine	9	6.38378e-14	276.667	448	11	0	0	NA	21
./Non-Model-Fish-Gut/ftp.ebi.ac.uk/pub/databases/metagenomics/mgnify_genomes/non-model-fish-gut/v2.0/species_catalogue/MGYG0002995/MGYG000299520/genome/MGYG000299520.fna	0.105655	12	0	32.5	40	19	115845	303781	6425	Non-Model-Fish-Gut	9	4.10783e-15	59.6667	99	26	0	0	NA	21
./Human-Oral/ftp.ebi.ac.uk/pub/databases/metagenomics/mgnify_genomes/human-oral/v1.0/species_catalogue/MGYG0002992/MGYG000299211/genome/MGYG000299211.fna	0.145899	11	0	22.0909	38	4	191008	754293	21431	Human-Oral	10	1.11022e-15	92.7	157	39	0	0	NA	21
./Human-Gut/pub/databases/metagenomics/mgnify_genomes/human-gut/v2.0/species_catalogue/MGYG0000033/MGYG000003319/genome/MGYG000003319.fna	0.10734	17	0	11.5294	14	2	97182.6	463703	14891	Human-Gut	3	0.000190224	378	758	38	0	0	NA	20
./Human-Gut/pub/databases/metagenomics/mgnify_genomes/human-gut/v2.0/species_catalogue/MGYG0000039/MGYG000003926/genome/MGYG000003926.fna	0.142931	13	0	37.1538	43	34	171269	383644	21166	Human-Gut	7	2.13395e-10	166.714	326	6	0	0	NA	20
./Human-Gut/pub/databases/metagenomics/mgnify_genomes/human-gut/v2.0/species_catalogue/MGYG0000037/MGYG000003721/genome/MGYG000003721.fna	0.0882529	12	0	13.1667	18	12	118330	426519	5499	Human-Gut	8	8.43769e-14	112.25	189	27	0	0	NA	20
./Human-Gut/pub/databases/metagenomics/mgnify_genomes/human-gut/v2.0/species_catalogue/MGYG0000028/MGYG000002895/genome/MGYG000002895.fna	0.0938789	12	0	228.667	2405	19	122474	304186	10342	Human-Gut	8	1.37668e-13	133.125	266	3	0	0	NA	20
./Marine/ftp.ebi.ac.uk/pub/databases/metagenomics/mgnify_genomes/marine/v1.0/species_catalogue/MGYG0002968/MGYG000296808/genome/MGYG000296808.fna	0.179545	12	0	106.333	199	5	171014	958667	7679	Marine	8	2.28366e-11	44.625	90	2	0	0	NA	20
./Human-Gut/pub/databases/metagenomics/mgnify_genomes/human-gut/v2.0/species_catalogue/MGYG0000039/MGYG000003900/genome/MGYG000003900.fna	0.113014	11	0	35.4545	42	24	124272	351007	11366	Human-Gut	9	7.43849e-15	184.222	360	21	0	0	NA	20
./Marine/ftp.ebi.ac.uk/pub/databases/metagenomics/mgnify_genomes/marine/v1.0/species_catalogue/MGYG0002969/MGYG000296979/genome/MGYG000296979.fna	0.151796	11	0	27.1818	41	2	211615	485054	21279	Marine	9	1.02918e-13	422.889	738	55	0	0	NA	20
./Human-Gut/pub/databases/metagenomics/mgnify_genomes/human-gut/v2.0/species_catalogue/MGYG0000035/MGYG000003515/genome/MGYG000003515.fna	0.122225	11	0	10.8182	22	1	163478	468811	18041	Human-Gut	9	1.4988e-14	79.1111	139	19	0	0	NA	20
./Human-Gut/pub/databases/metagenomics/mgnify_genomes/human-gut/v2.0/species_catalogue/MGYG0000032/MGYG000003222/genome/MGYG000003222.fna	0.0848292	12	0	5.83333	11	1	111561	203291	3715	Human-Gut	7	5.82334e-12	98.8571	127	75	0	0	NA	19
./Mouse-Gut/ftp.ebi.ac.uk/pub/databases/metagenomics/mgnify_genomes/mouse-gut/v1.0/species_catalogue/MGYG0003310/MGYG000331069/genome/MGYG000331069.fna	0.147034	12	0	26.6667	39	10	170337	815120	12238	Mouse-Gut	7	2.59222e-10	201.429	329	43	0	0	NA	19
./Human-Gut/pub/databases/metagenomics/mgnify_genomes/human-gut/v2.0/species_catalogue/MGYG0000016/MGYG000001675/genome/MGYG000001675.fna	0.135019	12	0	20.0833	41	2	160274	671084	8858	Human-Gut	7	1.44233e-10	109	156	5	0	0	NA	19
./Mouse-Gut/ftp.ebi.ac.uk/pub/databases/metagenomics/mgnify_genomes/mouse-gut/v1.0/species_catalogue/MGYG0003345/MGYG000334507/genome/MGYG000334507.fna	0.0346821	11	0	156.545	1544	2	11973.5	26415	21	Mouse-Gut	8	0	81.125	138	20	41.5	70	16	19
./Human-Gut/pub/databases/metagenomics/mgnify_genomes/human-gut/v2.0/species_catalogue/MGYG0000037/MGYG000003764/genome/MGYG000003764.fna	0.0645111	11	0	11.0909	38	1	80448.2	254297	22317	Human-Gut	8	6.99441e-15	125.75	287	7	0	0	NA	19
./Human-Gut/pub/databases/metagenomics/mgnify_genomes/human-gut/v2.0/species_catalogue/MGYG0000029/MGYG000002984/genome/MGYG000002984.fna	0.0983954	10	0	23.6	39	5	104396	278081	15072	Human-Gut	9	2.22045e-15	176.444	254	2	0	0	NA	19
./Mouse-Gut/ftp.ebi.ac.uk/pub/databases/metagenomics/mgnify_genomes/mouse-gut/v1.0/species_catalogue/MGYG0003280/MGYG000328068/genome/MGYG000328068.fna	0.189442	13	0	1341.38	9242	36	199110	863310	14632	Mouse-Gut	5	1.73698e-06	78.2	112	16	0	0	NA	18
./Human-Gut/pub/databases/metagenomics/mgnify_genomes/human-gut/v2.0/species_catalogue/MGYG0000015/MGYG000001577/genome/MGYG000001577.fna	0.140315	11	0	1820.55	19970	2	209895	778130	28674	Human-Gut	7	1.87942e-10	97.4286	177	22	0	0	NA	18
./Mouse-Gut/ftp.ebi.ac.uk/pub/databases/metagenomics/mgnify_genomes/mouse-gut/v1.0/species_catalogue/MGYG0003240/MGYG000324087/genome/MGYG000324087.fna	0.0936819	10	0	32.5	41	18	143463	988807	34	Mouse-Gut	8	1.35336e-13	21.5	44	3	0	0	NA	18
./Human-Gut/pub/databases/metagenomics/mgnify_genomes/human-gut/v2.0/species_catalogue/MGYG0000016/MGYG000001645/genome/MGYG000001645.fna	0.152194	14	0	8.07143	20	1	153062	756518	25250	Human-Gut	3	0.000524396	209.333	295	107	0	0	NA	17
./Human-Gut/pub/databases/metagenomics/mgnify_genomes/human-gut/v2.0/species_catalogue/MGYG0000037/MGYG000003722/genome/MGYG000003722.fna	0.096193	12	0	12.75	28	3	125920	690324	3176	Human-Gut	5	6.33522e-08	50.2	73	34	0	0	NA	17
./Marine/ftp.ebi.ac.uk/pub/databases/metagenomics/mgnify_genomes/marine/v1.0/species_catalogue/MGYG0002969/MGYG000296981/genome/MGYG000296981.fna	0.151284	12	0	34.75	43	15	162629	451516	26888	Marine	5	5.82274e-07	178.2	358	25	0	0	NA	17
./Human-Gut/pub/databases/metagenomics/mgnify_genomes/human-gut/v2.0/species_catalogue/MGYG0000037/MGYG000003759/genome/MGYG000003759.fna	0.0853944	12	0	1640.67	19522	12	95725.9	203786	13379	Human-Gut	4	2.06957e-06	38.5	66	9	0	0	NA	16
./Human-Gut/pub/databases/metagenomics/mgnify_genomes/human-gut/v2.0/species_catalogue/MGYG0000021/MGYG000002127/genome/MGYG000002127.fna	0.0617632	10	0	35.3	37	31	94472.4	626763	5410	Human-Gut	6	7.31255e-11	212.333	362	106	0	0	NA	16
./Non-Model-Fish-Gut/ftp.ebi.ac.uk/pub/databases/metagenomics/mgnify_genomes/non-model-fish-gut/v2.0/species_catalogue/MGYG0002995/MGYG000299554/genome/MGYG000299554.fna	0.0209429	9	0	25	37	1	21518.7	53209	6072	Non-Model-Fish-Gut	7	3.33067e-16	46.5714	83	20	0	0	NA	16
./Human-Gut/pub/databases/metagenomics/mgnify_genomes/human-gut/v2.0/species_catalogue/MGYG0000037/MGYG000003730/genome/MGYG000003730.fna	0.0820158	13	0	145.462	1744	3	92270.4	331182	5372	Human-Gut	2	0.00318493	8	12	4	0	0	NA	15
./Mouse-Gut/ftp.ebi.ac.uk/pub/databases/metagenomics/mgnify_genomes/mouse-gut/v1.0/species_catalogue/MGYG0003493/MGYG000349368/genome/MGYG000349368.fna	0.0901703	11	0	23.2727	38	5	49646.3	181482	462	Mouse-Gut	4	2.56308e-06	292.25	551	68	74.5	127	4	15
./Human-Oral/ftp.ebi.ac.uk/pub/databases/metagenomics/mgnify_genomes/human-oral/v1.0/species_catalogue/MGYG0002980/MGYG000298078/genome/MGYG000298078.fna	0.0629367	9	0	628.778	5501	3	109818	223978	32556	Human-Oral	5	7.8087e-09	108	214	28	0	0	NA	14
./Human-Gut/pub/databases/metagenomics/mgnify_genomes/human-gut/v2.0/species_catalogue/MGYG0000036/MGYG000003677/genome/MGYG000003677.fna	0.0777236	11	0	15.9091	55	3	118809	214322	3099	Human-Gut	2	0.00286844	183.5	197	170	0	0	NA	13
./Human-Gut/pub/databases/metagenomics/mgnify_genomes/human-gut/v2.0/species_catalogue/MGYG0000034/MGYG000003446/genome/MGYG000003446.fna	0.100272	10	0	12.1	24	3	111221	431647	10045	Human-Gut	3	0.000155889	51.6667	56	49	0	0	NA	13
./Human-Gut/pub/databases/metagenomics/mgnify_genomes/human-gut/v2.0/species_catalogue/MGYG0000035/MGYG000003594/genome/MGYG000003594.fna	0.168518	11	1.11e-16	17.0909	91	3	244940	774694	23435	Human-Gut	15	0	125	264	12	0	0	NA	26
./Mouse-Gut/ftp.ebi.ac.uk/pub/databases/metagenomics/mgnify_genomes/mouse-gut/v1.0/species_catalogue/MGYG0003237/MGYG000323725/genome/MGYG000323725.fna	0.111354	10	1.11e-16	1012.6	9882	6	111794	417905	5816	Mouse-Gut	8	5.3102e-13	115.75	194	33	0	0	NA	18
./Pig-Gut/ftp.ebi.ac.uk/pub/databases/metagenomics/mgnify_genomes/pig-gut/v1.0/species_catalogue/MGYG0003024/MGYG000302468/genome/MGYG000302468.fna	0.110034	10	1.11e-16	557.1	5364	4	161625	557098	12666	Pig-Gut	8	4.8328e-13	112.5	250	24	0	0	NA	18
./Human-Gut/pub/databases/metagenomics/mgnify_genomes/human-gut/v2.0/species_catalogue/MGYG0000037/MGYG000003773/genome/MGYG000003773.fna	0.183145	11	1.11e-16	14.5455	26	11	225229	550792	5506	Human-Gut	6	4.48097e-08	170.333	288	23	0	0	NA	17
./Non-Model-Fish-Gut/ftp.ebi.ac.uk/pub/databases/metagenomics/mgnify_genomes/non-model-fish-gut/v2.0/species_catalogue/MGYG0002995/MGYG000299563/genome/MGYG000299563.fna	0.0374271	8	1.11e-16	25.5	37	12	45239.4	88050	3035	Non-Model-Fish-Gut	9	0	37.6667	75	9	0	0	NA	17
./Human-Oral/ftp.ebi.ac.uk/pub/databases/metagenomics/mgnify_genomes/human-oral/v1.0/species_catalogue/MGYG0002990/MGYG000299068/genome/MGYG000299068.fna	0.0384422	8	1.11e-16	18.125	43	1	76881.8	214887	27811	Human-Oral	7	2.37588e-14	31.5714	52	8	0	0	NA	15
./Human-Oral/ftp.ebi.ac.uk/pub/databases/metagenomics/mgnify_genomes/human-oral/v1.0/species_catalogue/MGYG0002985/MGYG000298506/genome/MGYG000298506.fna	0.0701075	9	1.11e-16	22.4444	38	2	104298	272443	5142	Human-Oral	3	5.44937e-05	41.3333	43	39	0	0	NA	12
./Mouse-Gut/ftp.ebi.ac.uk/pub/databases/metagenomics/mgnify_genomes/mouse-gut/v1.0/species_catalogue/MGYG0004046/MGYG000404651/genome/MGYG000404651.fna	0.0419301	8	2.22e-16	26	36	9	79030.9	218625	11972	Mouse-Gut	8	2.22045e-16	23.25	35	8	0	0	NA	16
./Human-Oral/ftp.ebi.ac.uk/pub/databases/metagenomics/mgnify_genomes/human-oral/v1.0/species_catalogue/MGYG0002985/MGYG000298568/genome/MGYG000298568.fna	0.0768521	9	2.22e-16	21.2222	71	2	128822	360912	3057	Human-Oral	3	7.14219e-05	104.667	122	95	0	0	NA	12
./Human-Gut/pub/databases/metagenomics/mgnify_genomes/human-gut/v2.0/species_catalogue/MGYG0000035/MGYG000003560/genome/MGYG000003560.fna	0.0812223	9	4.44e-16	11.5556	24	2	108201	194316	9012	Human-Gut	16	0	49.5625	96	2	0	0	NA	25
./Human-Gut/pub/databases/metagenomics/mgnify_genomes/human-gut/v2.0/species_catalogue/MGYG0000039/MGYG000003924/genome/MGYG000003924.fna	0.132606	10	4.44e-16	340.3	2981	4	182337	416321	8794	Human-Gut	7	1.27402e-10	132.286	316	6	0	0	NA	17
./Human-Gut/pub/databases/metagenomics/mgnify_genomes/human-gut/v2.0/species_catalogue/MGYG0000037/MGYG000003716/genome/MGYG000003716.fna	0.0812902	9	4.44e-16	9.55556	13	3	140912	410261	3696	Human-Gut	3	8.42442e-05	154	266	56	0	0	NA	12
./Mouse-Gut/ftp.ebi.ac.uk/pub/databases/metagenomics/mgnify_genomes/mouse-gut/v1.0/species_catalogue/MGYG0003308/MGYG000330898/genome/MGYG000330898.fna	0.137145	10	5.55e-16	19	42	1	215137	615162	26216	Mouse-Gut	12	0	203.417	333	8	0	0	NA	22
./Mouse-Gut/ftp.ebi.ac.uk/pub/databases/metagenomics/mgnify_genomes/mouse-gut/v1.0/species_catalogue/MGYG0003282/MGYG000328223/genome/MGYG000328223.fna	0.0850363	9	5.55e-16	27.2222	42	10	130099	843471	2693	Mouse-Gut	8	6.28386e-14	133.375	240	2	0	0	NA	17
./Human-Gut/pub/databases/metagenomics/mgnify_genomes/human-gut/v2.0/species_catalogue/MGYG0000032/MGYG000003297/genome/MGYG000003297.fna	0.0884387	9	8.88e-16	20.4444	61	6	155992	410089	14647	Human-Gut	19	0	261.368	498	17	0	0	NA	28
./Mouse-Gut/ftp.ebi.ac.uk/pub/databases/metagenomics/mgnify_genomes/mouse-gut/v1.0/species_catalogue/MGYG0003227/MGYG000322796/genome/MGYG000322796.fna	0.143503	10	8.88e-16	1016.2	9965	1	34422.6	96924	20	Mouse-Gut	13	0	66.3077	181	8	175	343	46	23
./Pig-Gut/ftp.ebi.ac.uk/pub/databases/metagenomics/mgnify_genomes/pig-gut/v1.0/species_catalogue/MGYG0003032/MGYG000303259/genome/MGYG000303259.fna	0.0908214	9	1.11e-15	34.4444	39	31	149167	485580	8660	Pig-Gut	10	0	100.4	145	44	0	0	NA	19
./Human-Gut/pub/databases/metagenomics/mgnify_genomes/human-gut/v2.0/species_catalogue/MGYG0000037/MGYG000003749/genome/MGYG000003749.fna	0.0516471	8	1.22e-15	13.875	35	6	37066.2	132175	4107	Human-Gut	14	0	64.6429	124	3	0	0	NA	22
./Human-Gut/pub/databases/metagenomics/mgnify_genomes/human-gut/v2.0/species_catalogue/MGYG0000034/MGYG000003430/genome/MGYG000003430.fna	0.0933455	9	1.33e-15	12.1111	25	1	134957	462310	21	Human-Gut	23	0	73.6957	143	3	0	0	NA	32
./Human-Oral/ftp.ebi.ac.uk/pub/databases/metagenomics/mgnify_genomes/human-oral/v1.0/species_catalogue/MGYG0002981/MGYG000298183/genome/MGYG000298183.fna	0.150165	10	1.44e-15	22.2	38	3	90139.8	209937	19340	Human-Oral	13	0	144.308	251	2	0	0	NA	23
./Human-Gut/pub/databases/metagenomics/mgnify_genomes/human-gut/v2.0/species_catalogue/MGYG0000030/MGYG000003074/genome/MGYG000003074.fna	0.150548	10	1.44e-15	3912.5	36940	5	209680	1026331	2147	Human-Gut	4	1.89809e-05	93.5	133	25	0	0	NA	14
./Mouse-Gut/ftp.ebi.ac.uk/pub/databases/metagenomics/mgnify_genomes/mouse-gut/v1.0/species_catalogue/MGYG0003267/MGYG000326756/genome/MGYG000326756.fna	0.053152	8	1.55e-15	34.625	47	8	89113.5	188175	10258	Mouse-Gut	7	2.27041e-13	62.5714	98	10	0	0	NA	15
./Mouse-Gut/ftp.ebi.ac.uk/pub/databases/metagenomics/mgnify_genomes/mouse-gut/v1.0/species_catalogue/MGYG0003525/MGYG000352581/genome/MGYG000352581.fna	0.156018	10	2e-15	364.2	3439	5	40807	97964	29	Mouse-Gut	16	0	82.8125	164	10	161.615	274	43	26
./Human-Gut/pub/databases/metagenomics/mgnify_genomes/human-gut/v2.0/species_catalogue/MGYG0000026/MGYG000002629/genome/MGYG000002629.fna	0.0557843	8	2.22e-15	164.5	934	1	102846	375237	9239	Human-Gut	8	2.22045e-15	186.5	303	25	0	0	NA	16
./Human-Gut/pub/databases/metagenomics/mgnify_genomes/human-gut/v2.0/species_catalogue/MGYG0000005/MGYG000000522/genome/MGYG000000522.fna	0.100757	9	2.66e-15	14.1111	27	3	177585	1011193	1675	Human-Gut	11	0	66.6364	122	5	0	0	NA	20
./Mouse-Gut/ftp.ebi.ac.uk/pub/databases/metagenomics/mgnify_genomes/mouse-gut/v1.0/species_catalogue/MGYG0003273/MGYG000327333/genome/MGYG000327333.fna	0.102938	9	3.22e-15	29.7778	43	4	164802	359302	26355	Mouse-Gut	11	0	57.9091	89	10	0	0	NA	20
./Human-Gut/pub/databases/metagenomics/mgnify_genomes/human-gut/v2.0/species_catalogue/MGYG0000031/MGYG000003108/genome/MGYG000003108.fna	0.103356	9	3.33e-15	13	25	4	54577.4	167049	18	Human-Gut	8	2.94653e-13	182.875	275	48	0	0	NA	17
./Human-Gut/pub/databases/metagenomics/mgnify_genomes/human-gut/v2.0/species_catalogue/MGYG0000036/MGYG000003634/genome/MGYG000003634.fna	0.103155	9	3.33e-15	11.6667	36	2	168285	357507	4051	Human-Gut	8	2.90101e-13	106.125	188	19	0	0	NA	17
./Marine/ftp.ebi.ac.uk/pub/databases/metagenomics/mgnify_genomes/marine/v1.0/species_catalogue/MGYG0002972/MGYG000297264/genome/MGYG000297264.fna	0.164678	10	3.44e-15	72.2	145	4	237504	1048131	18802	Marine	7	5.64303e-10	34.2857	73	4	0	0	NA	17
./Pig-Gut/ftp.ebi.ac.uk/pub/databases/metagenomics/mgnify_genomes/pig-gut/v1.0/species_catalogue/MGYG0003032/MGYG000303243/genome/MGYG000303243.fna	0.103905	9	3.55e-15	33.1111	39	23	150184	573471	23445	Pig-Gut	17	0	64.8824	133	7	0	0	NA	26
./Human-Gut/pub/databases/metagenomics/mgnify_genomes/human-gut/v2.0/species_catalogue/MGYG0000034/MGYG000003428/genome/MGYG000003428.fna	0.112315	9	7.11e-15	9.66667	23	2	157909	430298	42997	Human-Gut	6	2.53233e-09	128.5	300	12	0	0	NA	15
./Mouse-Gut/ftp.ebi.ac.uk/pub/databases/metagenomics/mgnify_genomes/mouse-gut/v1.0/species_catalogue/MGYG0003269/MGYG000326934/genome/MGYG000326934.fna	0.188379	10	1.31e-14	23.7	40	1	191021	1090753	6291	Mouse-Gut	14	0	83	148	4	0	0	NA	24
./Human-Gut/pub/databases/metagenomics/mgnify_genomes/human-gut/v2.0/species_catalogue/MGYG0000033/MGYG000003364/genome/MGYG000003364.fna	0.123321	9	1.63e-14	12.4444	23	2	229362	776513	3928	Human-Gut	12	0	60.1667	106	7	0	0	NA	21
./Non-Model-Fish-Gut/ftp.ebi.ac.uk/pub/databases/metagenomics/mgnify_genomes/non-model-fish-gut/v2.0/species_catalogue/MGYG0002995/MGYG000299539/genome/MGYG000299539.fna	0.0369224	7	1.8e-14	30.1429	36	12	71795.6	193955	7764	Non-Model-Fish-Gut	8	1.11022e-16	23.125	38	2	0	0	NA	15
./Human-Gut/pub/databases/metagenomics/mgnify_genomes/human-gut/v2.0/species_catalogue/MGYG0000035/MGYG000003561/genome/MGYG000003561.fna	0.0737973	8	2.04e-14	11.25	23	1	150552	234056	58432	Human-Gut	11	0	81.1818	167	9	0	0	NA	19
./Human-Gut/pub/databases/metagenomics/mgnify_genomes/human-gut/v2.0/species_catalogue/MGYG0000037/MGYG000003791/genome/MGYG000003791.fna	0.127667	9	2.21e-14	13.7778	22	12	168679	364307	18204	Human-Gut	2	0.00748791	226.5	249	204	0	0	NA	11
./Human-Gut/pub/databases/metagenomics/mgnify_genomes/human-gut/v2.0/species_catalogue/MGYG0000004/MGYG000000495/genome/MGYG000000495.fna	0.128056	9	2.28e-14	10.5556	31	2	84324.4	230806	19493	Human-Gut	15	0	45.2143	72	5	0	0	NA	24
./Pig-Gut/ftp.ebi.ac.uk/pub/databases/metagenomics/mgnify_genomes/pig-gut/v1.0/species_catalogue/MGYG0003023/MGYG000302383/genome/MGYG000302383.fna	0.128302	9	2.31e-14	31.3333	59	3	182003	680431	23605	Pig-Gut	5	2.60392e-07	148.8	294	12	0	0	NA	14
./Marine/ftp.ebi.ac.uk/pub/databases/metagenomics/mgnify_genomes/marine/v1.0/species_catalogue/MGYG0002968/MGYG000296850/genome/MGYG000296850.fna	0.042483	7	4.77e-14	102.857	163	13	91670.4	183910	15718	Marine	2	0.000877246	5	6	4	0	0	NA	9
./Human-Gut/pub/databases/metagenomics/mgnify_genomes/human-gut/v2.0/species_catalogue/MGYG0000035/MGYG000003528/genome/MGYG000003528.fna	0.218105	10	5.51e-14	9.9	14	3	362943	1080470	43355	Human-Gut	24	0	208.833	328	21	0	0	NA	34
./Human-Gut/pub/databases/metagenomics/mgnify_genomes/human-gut/v2.0/species_catalogue/MGYG0000007/MGYG000000720/genome/MGYG000000720.fna	0.223955	10	7.14e-14	327	3088	6	257669	848403	20919	Human-Gut	7	4.61024e-09	84.4286	147	19	0	0	NA	17
./Honeybee-Gut/ftp.ebi.ac.uk/pub/databases/metagenomics/mgnify_genomes/honeybee-gut/v1.0/species_catalogue/MGYG0003213/MGYG000321339/genome/MGYG000321339.fna	0.226652	10	8.03e-14	31.9	55	15	297918	934269	21543	Honeybee-Gut	6	1.55105e-07	173.167	311	71	0	0	NA	16
./Mouse-Gut/ftp.ebi.ac.uk/pub/databases/metagenomics/mgnify_genomes/mouse-gut/v1.0/species_catalogue/MGYG0003311/MGYG000331115/genome/MGYG000331115.fna	0.0881572	8	8.37e-14	22.375	39	1	60927.1	123188	17421	Mouse-Gut	9	7.77156e-16	151.111	248	16	0	0	NA	17
./Human-Gut/pub/databases/metagenomics/mgnify_genomes/human-gut/v2.0/species_catalogue/MGYG0000037/MGYG000003729/genome/MGYG000003729.fna	0.0899862	8	9.85e-14	18.5	45	11	128778	472241	10341	Human-Gut	1	0.0860562	69	69	69	0	0	NA	9
./Human-Gut/pub/databases/metagenomics/mgnify_genomes/human-gut/v2.0/species_catalogue/MGYG0000033/MGYG000003327/genome/MGYG000003327.fna	0.15186	9	1.03e-13	215.444	1837	3	119929	347447	5185	Human-Gut	7	3.23613e-10	59.7143	97	9	0	0	NA	16
./Human-Gut/pub/databases/metagenomics/mgnify_genomes/human-gut/v2.0/species_catalogue/MGYG0000021/MGYG000002122/genome/MGYG000002122.fna	0.0921069	8	1.18e-13	25.25	40	1	184684	499674	22907	Human-Gut	11	0	198.091	310	28	0	0	NA	19
./Mouse-Gut/ftp.ebi.ac.uk/pub/databases/metagenomics/mgnify_genomes/mouse-gut/v1.0/species_catalogue/MGYG0003249/MGYG000324944/genome/MGYG000324944.fna	0.162179	9	1.85e-13	32.4444	38	3	161568	461802	8611	Mouse-Gut	10	2.9976e-15	83.1	175	4	0	0	NA	19
./Pig-Gut/ftp.ebi.ac.uk/pub/databases/metagenomics/mgnify_genomes/pig-gut/v1.0/species_catalogue/MGYG0003024/MGYG000302443/genome/MGYG000302443.fna	0.0984333	8	2e-13	23.375	41	3	129448	390163	5054	Pig-Gut	5	7.09491e-08	157	262	60	0	0	NA	13
./Human-Gut/pub/databases/metagenomics/mgnify_genomes/human-gut/v2.0/species_catalogue/MGYG0000028/MGYG000002886/genome/MGYG000002886.fna	0.254645	10	2.51e-13	31.6	35	26	377306	963992	20940	Human-Gut	13	0	185	401	12	0	0	NA	23
./Human-Gut/pub/databases/metagenomics/mgnify_genomes/human-gut/v2.0/species_catalogue/MGYG0000016/MGYG000001640/genome/MGYG000001640.fna	0.170369	9	2.86e-13	8.88889	15	2	255477	712199	43144	Human-Gut	10	4.88498e-15	71.2	130	2	0	0	NA	19
./Mouse-Gut/ftp.ebi.ac.uk/pub/databases/metagenomics/mgnify_genomes/mouse-gut/v1.0/species_catalogue/MGYG0003237/MGYG000323744/genome/MGYG000323744.fna	0.260334	10	3.11e-13	34.7	40	24	263796	858656	29221	Mouse-Gut	14	0	107.786	223	17	0	0	NA	24
./Human-Gut/pub/databases/metagenomics/mgnify_genomes/human-gut/v2.0/species_catalogue/MGYG0000034/MGYG000003445/genome/MGYG000003445.fna	0.106586	8	3.76e-13	11.125	18	3	205274	555512	98456	Human-Gut	9	4.44089e-15	93.3333	152	17	0	0	NA	17
./Human-Gut/pub/databases/metagenomics/mgnify_genomes/human-gut/v2.0/species_catalogue/MGYG0000037/MGYG000003731/genome/MGYG000003731.fna	0.106672	8	3.78e-13	14.75	22	10	213655	1277143	3617	Human-Gut	8	3.78253e-13	49.25	91	18	0	0	NA	16
./Mouse-Gut/ftp.ebi.ac.uk/pub/databases/metagenomics/mgnify_genomes/mouse-gut/v1.0/species_catalogue/MGYG0003227/MGYG000322701/genome/MGYG000322701.fna	0.0583496	7	4.34e-13	28.1429	34	2	48751.6	146609	15810	Mouse-Gut	4	4.60984e-07	21	34	9	50	73	37	11
./Human-Gut/pub/databases/metagenomics/mgnify_genomes/human-gut/v2.0/species_catalogue/MGYG0000035/MGYG000003546/genome/MGYG000003546.fna	0.180652	9	4.8e-13	12.7778	24	3	271755	1259758	4659	Human-Gut	3	0.000858623	69	124	30	0	0	NA	12
./Human-Gut/pub/databases/metagenomics/mgnify_genomes/human-gut/v2.0/species_catalogue/MGYG0000036/MGYG000003649/genome/MGYG000003649.fna	0.182167	9	5.17e-13	8.33333	18	3	336251	1151061	33633	Human-Gut	6	4.34299e-08	215.667	357	29	0	0	NA	15
./Mouse-Gut/ftp.ebi.ac.uk/pub/databases/metagenomics/mgnify_genomes/mouse-gut/v1.0/species_catalogue/MGYG0003240/MGYG000324055/genome/MGYG000324055.fna	0.0626513	7	7.12e-13	30.1429	35	16	86785	209749	34	Mouse-Gut	4	6.10612e-07	13	21	4	0	0	NA	11
./Human-Gut/pub/databases/metagenomics/mgnify_genomes/human-gut/v2.0/species_catalogue/MGYG0000005/MGYG000000556/genome/MGYG000000556.fna	0.116626	8	7.65e-13	170	1242	3	149163	351604	9712	Human-Gut	4	7.02307e-06	74	229	9	0	0	NA	12
./Human-Gut/pub/databases/metagenomics/mgnify_genomes/human-gut/v2.0/species_catalogue/MGYG0000034/MGYG000003448/genome/MGYG000003448.fna	0.0634668	7	7.79e-13	12.4286	20	2	146778	389702	40778	Human-Gut	5	8.13953e-09	34.4	70	12	0	0	NA	12
./Human-Gut/pub/databases/metagenomics/mgnify_genomes/human-gut/v2.0/species_catalogue/MGYG0000037/MGYG000003732/genome/MGYG000003732.fna	0.118529	8	8.7e-13	15.625	24	11	152866	824629	5442	Human-Gut	6	3.47961e-09	42.3333	73	11	0	0	NA	14
./Human-Gut/pub/databases/metagenomics/mgnify_genomes/human-gut/v2.0/species_catalogue/MGYG0000033/MGYG000003378/genome/MGYG000003378.fna	0.293109	10	9.88e-13	2380.9	23651	9	369510	1541499	8899	Human-Gut	7	2.85507e-08	68.1429	125	7	0	0	NA	17
./Human-Gut/pub/databases/metagenomics/mgnify_genomes/human-gut/v2.0/species_catalogue/MGYG0000016/MGYG000001652/genome/MGYG000001652.fna	0.121259	8	1.04e-12	10.625	33	1	152826	504844	9491	Human-Gut	1	0.114196	94	94	94	0	0	NA	9
./Mouse-Gut/ftp.ebi.ac.uk/pub/databases/metagenomics/mgnify_genomes/mouse-gut/v1.0/species_catalogue/MGYG0003337/MGYG000333766/genome/MGYG000333766.fna	0.202175	9	1.3e-12	247.444	1946	27	138519	353358	60140	Mouse-Gut	5	2.37938e-06	237.4	500	31	53	97	10	14
./Pig-Gut/ftp.ebi.ac.uk/pub/databases/metagenomics/mgnify_genomes/pig-gut/v1.0/species_catalogue/MGYG0003022/MGYG000302221/genome/MGYG000302221.fna	0.126908	8	1.49e-12	2547.38	20163	4	224161	1044585	14318	Pig-Gut	14	0	109.429	219	6	0	0	NA	22
./Human-Gut/pub/databases/metagenomics/mgnify_genomes/human-gut/v2.0/species_catalogue/MGYG0000031/MGYG000003109/genome/MGYG000003109.fna	0.0714389	7	1.77e-12	429.714	2954	1	169758	704767	6370	Human-Gut	7	1.77003e-12	129.857	255	45	0	0	NA	14
./Human-Gut/pub/databases/metagenomics/mgnify_genomes/human-gut/v2.0/species_catalogue/MGYG0000010/MGYG000001033/genome/MGYG000001033.fna	0.129879	8	1.79e-12	9.5	18	3	267036	813160	1176	Human-Gut	9	2.57572e-14	448.667	724	75	0	0	NA	17
./Mouse-Gut/ftp.ebi.ac.uk/pub/databases/metagenomics/mgnify_genomes/mouse-gut/v1.0/species_catalogue/MGYG0003227/MGYG000322760/genome/MGYG000322760.fna	0.211225	9	1.91e-12	35.1111	38	32	211266	575708	32468	Mouse-Gut	13	0	116.231	228	33	133	166	100	22
./Mouse-Gut/ftp.ebi.ac.uk/pub/databases/metagenomics/mgnify_genomes/mouse-gut/v1.0/species_catalogue/MGYG0003237/MGYG000323783/genome/MGYG000323783.fna	0.0731985	7	2.1e-12	30.7143	40	6	151679	419452	9605	Mouse-Gut	1	0.0705837	107	107	107	0	0	NA	8
./Pig-Gut/ftp.ebi.ac.uk/pub/databases/metagenomics/mgnify_genomes/pig-gut/v1.0/species_catalogue/MGYG0003024/MGYG000302421/genome/MGYG000302421.fna	0.0732318	7	2.1e-12	28.8571	41	8	129027	342995	15242	Pig-Gut	1	0.0706146	34	34	34	0	0	NA	8
./Human-Gut/pub/databases/metagenomics/mgnify_genomes/human-gut/v2.0/species_catalogue/MGYG0000033/MGYG000003367/genome/MGYG000003367.fna	0.223304	9	3.11e-12	13836.4	96010	1	395924	1310921	19150	Human-Gut	3	0.00157114	55.3333	82	25	0	0	NA	12
./Human-Gut/pub/databases/metagenomics/mgnify_genomes/human-gut/v2.0/species_catalogue/MGYG0000005/MGYG000000537/genome/MGYG000000537.fna	0.139414	8	3.13e-12	11.125	22	1	57803.4	186648	8529	Human-Gut	16	0	56.0625	95	10	0	0	NA	24
./Mouse-Gut/ftp.ebi.ac.uk/pub/databases/metagenomics/mgnify_genomes/mouse-gut/v1.0/species_catalogue/MGYG0003274/MGYG000327457/genome/MGYG000327457.fna	0.139771	8	3.19e-12	35.25	36	33	223323	1072778	6329	Mouse-Gut	8	3.19078e-12	38.125	65	15	0	0	NA	16
./Mouse-Gut/ftp.ebi.ac.uk/pub/databases/metagenomics/mgnify_genomes/mouse-gut/v1.0/species_catalogue/MGYG0003309/MGYG000330962/genome/MGYG000330962.fna	0.0798095	7	3.82e-12	22.4286	39	6	113938	262428	9664	Mouse-Gut	2	0.00302029	99.5	129	70	0	0	NA	9
./Human-Gut/pub/databases/metagenomics/mgnify_genomes/human-gut/v2.0/species_catalogue/MGYG0000031/MGYG000003112/genome/MGYG000003112.fna	0.0833597	7	5.16e-12	17.1429	42	1	197908	488520	46424	Human-Gut	5	3.1294e-08	196.4	314	91	0	0	NA	12
./Mouse-Gut/ftp.ebi.ac.uk/pub/databases/metagenomics/mgnify_genomes/mouse-gut/v1.0/species_catalogue/MGYG0003275/MGYG000327534/genome/MGYG000327534.fna	0.236878	9	5.23e-12	32	41	4	158084	342389	12565	Mouse-Gut	11	2.66454e-15	72.9091	144	3	0	0	NA	20
./Mouse-Gut/ftp.ebi.ac.uk/pub/databases/metagenomics/mgnify_genomes/mouse-gut/v1.0/species_catalogue/MGYG0003304/MGYG000330463/genome/MGYG000330463.fna	0.149642	8	5.46e-12	21.75	48	5	127650	500416	33382	Mouse-Gut	10	1.33227e-15	39.6	105	3	0	0	NA	18
./Pig-Gut/ftp.ebi.ac.uk/pub/databases/metagenomics/mgnify_genomes/pig-gut/v1.0/species_catalogue/MGYG0003020/MGYG000302038/genome/MGYG000302038.fna	0.0847359	7	5.78e-12	26.4286	38	11	156643	354489	13429	Pig-Gut	6	4.78139e-10	163	209	96	0	0	NA	13
./Marine/ftp.ebi.ac.uk/pub/databases/metagenomics/mgnify_genomes/marine/v1.0/species_catalogue/MGYG0002964/MGYG000296401/genome/MGYG000296401.fna	0.0850611	7	5.93e-12	133.286	291	5	163098	387849	4344	Marine	6	4.89117e-10	57	73	11	0	0	NA	13
./Human-Gut/pub/databases/metagenomics/mgnify_genomes/human-gut/v2.0/species_catalogue/MGYG0000033/MGYG000003308/genome/MGYG000003308.fna	0.155112	8	7.24e-12	696.625	2750	10	320983	809310	67235	Human-Gut	5	6.57681e-07	260.6	409	89	0	0	NA	13
./Human-Gut/pub/databases/metagenomics/mgnify_genomes/human-gut/v2.0/species_catalogue/MGYG0000030/MGYG000003005/genome/MGYG000003005.fna	0.155973	8	7.56e-12	358.125	2596	18	305907	939889	45068	Human-Gut	9	1.30895e-13	151.333	286	19	0	0	NA	17
./Human-Gut/pub/databases/metagenomics/mgnify_genomes/human-gut/v2.0/species_catalogue/MGYG0000035/MGYG000003549/genome/MGYG000003549.fna	0.0884237	7	7.76e-12	10.4286	18	1	192039	282019	12948	Human-Gut	10	0	51	102	10	0	0	NA	17
./Human-Gut/pub/databases/metagenomics/mgnify_genomes/human-gut/v2.0/species_catalogue/MGYG0000046/MGYG000004615/genome/MGYG000004615.fna	0.0906792	7	9.24e-12	2.71429	5	1	136871	464548	4801	Human-Gut	5	4.73779e-08	30.4	51	14	0	0	NA	12
./Pig-Gut/ftp.ebi.ac.uk/pub/databases/metagenomics/mgnify_genomes/pig-gut/v1.0/species_catalogue/MGYG0003024/MGYG000302445/genome/MGYG000302445.fna	0.0924125	7	1.05e-11	305.714	2006	1	144152	286633	23800	Pig-Gut	9	1.22125e-15	159.778	255	71	0	0	NA	16
./Human-Gut/pub/databases/metagenomics/mgnify_genomes/human-gut/v2.0/species_catalogue/MGYG0000026/MGYG000002666/genome/MGYG000002666.fna	0.0458126	6	1.23e-11	7	16	1	93710.5	189520	25618	Human-Gut	2	0.00101789	21	25	17	0	0	NA	8
./Human-Gut/pub/databases/metagenomics/mgnify_genomes/human-gut/v2.0/species_catalogue/MGYG0000037/MGYG000003782.1/genome/MGYG000003782.1.fna	0.094921	7	1.27e-11	6.85714	22	3	196103	446279	14486	Human-Gut	1	0.0905552	139	139	139	0	0	NA	8
./Human-Gut/pub/databases/metagenomics/mgnify_genomes/human-gut/v2.0/species_catalogue/MGYG0000035/MGYG000003563/genome/MGYG000003563.fna	0.100015	7	1.82e-11	1633.43	11369	6	211907	357772	82889	Human-Gut	8	2.27152e-13	34.875	67	9	0	0	NA	15
./Mouse-Gut/ftp.ebi.ac.uk/pub/databases/metagenomics/mgnify_genomes/mouse-gut/v1.0/species_catalogue/MGYG0003310/MGYG000331025/genome/MGYG000331025.fna	0.100972	7	1.94e-11	31.1429	82	4	186436	507071	7754	Mouse-Gut	8	2.45026e-13	61	148	9	0	0	NA	15
./Mouse-Gut/ftp.ebi.ac.uk/pub/databases/metagenomics/mgnify_genomes/mouse-gut/v1.0/species_catalogue/MGYG0003312/MGYG000331288/genome/MGYG000331288.fna	0.102344	7	2.13e-11	23.4286	38	3	107994	296420	9073	Mouse-Gut	5	8.5927e-08	123.4	236	29	0	0	NA	12
./Human-Gut/pub/databases/metagenomics/mgnify_genomes/human-gut/v2.0/species_catalogue/MGYG0000037/MGYG000003783/genome/MGYG000003783.fna	0.179707	8	2.3e-11	1907.62	8553	5	281770	577807	9098	Human-Gut	0	1	0	0	NA	0	0	NA	8
./Human-Gut/pub/databases/metagenomics/mgnify_genomes/human-gut/v2.0/species_catalogue/MGYG0000015/MGYG000001571/genome/MGYG000001571.fna	0.281901	9	2.4e-11	6	16	2	279912	719254	29205	Human-Gut	8	7.70193e-10	51.75	82	12	0	0	NA	17
./Mouse-Gut/ftp.ebi.ac.uk/pub/databases/metagenomics/mgnify_genomes/mouse-gut/v1.0/species_catalogue/MGYG0003311/MGYG000331191/genome/MGYG000331191.fna	0.104273	7	2.43e-11	19.4286	37	1	93765	219363	10400	Mouse-Gut	5	9.41879e-08	152.4	304	53	0	0	NA	12
./Pig-Gut/ftp.ebi.ac.uk/pub/databases/metagenomics/mgnify_genomes/pig-gut/v1.0/species_catalogue/MGYG0003020/MGYG000302023/genome/MGYG000302023.fna	0.0527513	6	2.86e-11	254.167	1408	14	116419	365789	25192	Pig-Gut	12	0	108	175	26	0	0	NA	18
./Human-Gut/pub/databases/metagenomics/mgnify_genomes/human-gut/v2.0/species_catalogue/MGYG0000021/MGYG000002107/genome/MGYG000002107.fna	0.107314	7	2.96e-11	4504	11627	39	239595	784691	59587	Human-Gut	2	0.00536227	145	218	72	0	0	NA	9
./Human-Gut/pub/databases/metagenomics/mgnify_genomes/human-gut/v2.0/species_catalogue/MGYG0000028/MGYG000002893/genome/MGYG000002893.fna	0.113051	7	4.24e-11	31	34	19	158952	287391	49773	Human-Gut	5	1.40066e-07	33.8	84	11	0	0	NA	12
./Mouse-Gut/ftp.ebi.ac.uk/pub/databases/metagenomics/mgnify_genomes/mouse-gut/v1.0/species_catalogue/MGYG0003306/MGYG000330651/genome/MGYG000330651.fna	0.113187	7	4.28e-11	28.2857	92	4	235401	483022	52996	Mouse-Gut	7	4.2772e-11	90	181	6	0	0	NA	14
./Mouse-Gut/ftp.ebi.ac.uk/pub/databases/metagenomics/mgnify_genomes/mouse-gut/v1.0/species_catalogue/MGYG0003685/MGYG000368546/genome/MGYG000368546.fna	0.114131	7	4.53e-11	23.2857	59	1	248487	535057	45220	Mouse-Gut	12	0	122	225	26	0	0	NA	19
./Marine/ftp.ebi.ac.uk/pub/databases/metagenomics/mgnify_genomes/marine/v1.0/species_catalogue/MGYG0002973/MGYG000297389/genome/MGYG000297389.fna	0.304268	9	4.69e-11	2128.44	17305	14	356684	1321057	1078	Marine	4	0.000280314	89.5	115	50	0	0	NA	13
./Mouse-Gut/ftp.ebi.ac.uk/pub/databases/metagenomics/mgnify_genomes/mouse-gut/v1.0/species_catalogue/MGYG0003283/MGYG000328321/genome/MGYG000328321.fna	0.114773	7	4.71e-11	33.4286	39	21	202728	443855	21	Mouse-Gut	17	0	105.941	173	39	0	0	NA	24
./Human-Gut/pub/databases/metagenomics/mgnify_genomes/human-gut/v2.0/species_catalogue/MGYG0000036/MGYG000003641/genome/MGYG000003641.fna	0.114875	7	4.74e-11	14.2857	27	5	257424	486270	50604	Human-Gut	2	0.00611392	88	138	38	0	0	NA	9
./Human-Gut/pub/databases/metagenomics/mgnify_genomes/human-gut/v2.0/species_catalogue/MGYG0000004/MGYG000000485/genome/MGYG000000485.fna	0.117998	7	5.7e-11	10.2857	21	1	147849	677001	3223	Human-Gut	4	7.3515e-06	43.75	69	21	0	0	NA	11
./Mouse-Gut/ftp.ebi.ac.uk/pub/databases/metagenomics/mgnify_genomes/mouse-gut/v1.0/species_catalogue/MGYG0003285/MGYG000328573/genome/MGYG000328573.fna	0.122609	7	7.42e-11	24.4286	38	5	227325	863429	2820	Mouse-Gut	4	8.53811e-06	98.25	193	36	0	0	NA	11
./Human-Gut/pub/databases/metagenomics/mgnify_genomes/human-gut/v2.0/species_catalogue/MGYG0000029/MGYG000002902/genome/MGYG000002902.fna	0.0620689	6	7.53e-11	26	35	10	156680	495463	40428	Human-Gut	3	3.80439e-05	95	208	5	0	0	NA	9
./Human-Gut/pub/databases/metagenomics/mgnify_genomes/human-gut/v2.0/species_catalogue/MGYG0000032/MGYG000003234/genome/MGYG000003234.fna	0.123624	7	7.86e-11	9.85714	23	3	287761	583286	68136	Human-Gut	1	0.116288	141	141	141	0	0	NA	8
./Pig-Gut/ftp.ebi.ac.uk/pub/databases/metagenomics/mgnify_genomes/pig-gut/v1.0/species_catalogue/MGYG0003023/MGYG000302393/genome/MGYG000302393.fna	0.0629691	6	8.2e-11	33.3333	38	17	126343	224475	19904	Pig-Gut	4	6.22939e-07	57	172	3	0	0	NA	10
./Mouse-Gut/ftp.ebi.ac.uk/pub/databases/metagenomics/mgnify_genomes/mouse-gut/v1.0/species_catalogue/MGYG0003307/MGYG000330732/genome/MGYG000330732.fna	0.125399	7	8.67e-11	31.4286	77	2	177219	756224	10297	Mouse-Gut	6	4.85062e-09	62.3333	173	13	0	0	NA	13
./Mouse-Gut/ftp.ebi.ac.uk/pub/databases/metagenomics/mgnify_genomes/mouse-gut/v1.0/species_catalogue/MGYG0003226/MGYG000322692/genome/MGYG000322692.fna	0.125612	7	8.77e-11	2357.71	16058	13	13257	42067	18	Mouse-Gut	4	9.38347e-06	68.75	95	51	133	139	127	11
./Mouse-Gut/ftp.ebi.ac.uk/pub/databases/metagenomics/mgnify_genomes/mouse-gut/v1.0/species_catalogue/MGYG0003242/MGYG000324203/genome/MGYG000324203.fna	0.0639832	6	9.02e-11	34.5	37	32	135989	310861	54077	Mouse-Gut	5	8.47247e-09	10.8	17	7	0	0	NA	11
./Human-Gut/pub/databases/metagenomics/mgnify_genomes/human-gut/v2.0/species_catalogue/MGYG0000037/MGYG000003766/genome/MGYG000003766.fna	0.0661949	6	1.1e-10	340.833	2016	3	149445	258911	39072	Human-Gut	5	1.00231e-08	197.6	380	95	0	0	NA	11
./Human-Gut/pub/databases/metagenomics/mgnify_genomes/human-gut/v2.0/species_catalogue/MGYG0000034/MGYG000003473/genome/MGYG000003473.fna	0.133099	7	1.31e-10	13.8571	19	9	240212	1035100	27891	Human-Gut	9	3.20854e-14	38.3333	56	15	0	0	NA	16
./Mouse-Gut/ftp.ebi.ac.uk/pub/databases/metagenomics/mgnify_genomes/mouse-gut/v1.0/species_catalogue/MGYG0003275/MGYG000327524/genome/MGYG000327524.fna	0.226883	8	1.42e-10	689.875	3797	34	352815	1787347	15632	Mouse-Gut	10	8.10463e-14	78.6	119	5	0	0	NA	18
./Human-Oral/ftp.ebi.ac.uk/pub/databases/metagenomics/mgnify_genomes/human-oral/v1.0/species_catalogue/MGYG0002985/MGYG000298526/genome/MGYG000298526.fna	0.135557	7	1.48e-10	30.5714	37	17	250863	1296080	16632	Human-Oral	8	2.50699e-12	25.125	57	9	0	0	NA	15
./Human-Gut/pub/databases/metagenomics/mgnify_genomes/human-gut/v2.0/species_catalogue/MGYG0000035/MGYG000003567/genome/MGYG000003567.fna	0.141217	7	1.96e-10	3595.14	25108	1	339251	930673	27139	Human-Gut	7	1.96412e-10	69.7143	127	13	0	0	NA	14
./Mouse-Gut/ftp.ebi.ac.uk/pub/databases/metagenomics/mgnify_genomes/mouse-gut/v1.0/species_catalogue/MGYG0003225/MGYG000322532/genome/MGYG000322532.fna	0.237029	8	2e-10	16351.2	81349	11	152820	490842	19	Mouse-Gut	7	6.78049e-09	65.7143	116	4	208.6	370	40	15
./Human-Gut/pub/databases/metagenomics/mgnify_genomes/human-gut/v2.0/species_catalogue/MGYG0000037/MGYG000003777/genome/MGYG000003777.fna	0.143362	7	2.18e-10	13.8571	24	11	267532	742118	45607	Human-Gut	10	8.88178e-16	38.4	59	3	0	0	NA	17
./Mouse-Gut/ftp.ebi.ac.uk/pub/databases/metagenomics/mgnify_genomes/mouse-gut/v1.0/species_catalogue/MGYG0003681/MGYG000368185/genome/MGYG000368185.fna	0.145015	7	2.36e-10	27.7143	41	1	5922.43	22157	1084	Mouse-Gut	4	1.64125e-05	208	457	76	550.25	924	279	11
./Human-Gut/pub/databases/metagenomics/mgnify_genomes/human-gut/v2.0/species_catalogue/MGYG0000029/MGYG000002900/genome/MGYG000002900.fna	0.146588	7	2.54e-10	31.4286	36	8	132732	515138	5217	Human-Gut	5	4.99295e-07	63.8	113	6	0	0	NA	12
./Human-Gut/pub/databases/metagenomics/mgnify_genomes/human-gut/v2.0/species_catalogue/MGYG0000037/MGYG000003745/genome/MGYG000003745.fna	0.0768635	6	2.68e-10	5.83333	12	1	133246	386620	45615	Human-Gut	2	0.0028069	249.5	333	166	0	0	NA	8
./Human-Gut/pub/databases/metagenomics/mgnify_genomes/human-gut/v2.0/species_catalogue/MGYG0000016/MGYG000001683/genome/MGYG000001683.fna	0.154288	7	3.61e-10	11.5714	33	1	324355	1817739	30522	Human-Gut	7	3.60858e-10	141.429	255	29	0	0	NA	14
./Pig-Gut/ftp.ebi.ac.uk/pub/databases/metagenomics/mgnify_genomes/pig-gut/v1.0/species_catalogue/MGYG0003021/MGYG000302157/genome/MGYG000302157.fna	0.0831304	6	4.27e-10	23.8333	38	2	86796.8	238037	3085	Pig-Gut	1	0.0797689	78	78	78	0	0	NA	7
./Human-Gut/pub/databases/metagenomics/mgnify_genomes/human-gut/v2.0/species_catalogue/MGYG0000037/MGYG000003774/genome/MGYG000003774.fna	0.0845405	6	4.72e-10	559	3302	2	225317	418074	18842	Human-Gut	1	0.0810655	71	71	71	0	0	NA	7
./Human-Gut/pub/databases/metagenomics/mgnify_genomes/human-gut/v2.0/species_catalogue/MGYG0000037/MGYG000003775/genome/MGYG000003775.fna	0.084627	6	4.75e-10	16.1667	25	12	190115	654054	65118	Human-Gut	8	6.05072e-14	59.75	150	4	0	0	NA	14
./Human-Gut/pub/databases/metagenomics/mgnify_genomes/human-gut/v2.0/species_catalogue/MGYG0000034/MGYG000003407/genome/MGYG000003407.fna	0.0359199	5	4.84e-10	9.2	18	1	117400	282602	21682	Human-Gut	13	0	85.7692	170	6	0	0	NA	18
./Mouse-Gut/ftp.ebi.ac.uk/pub/databases/metagenomics/mgnify_genomes/mouse-gut/v1.0/species_catalogue/MGYG0003313/MGYG000331354/genome/MGYG000331354.fna	0.162	7	5.04e-10	25.4286	39	1	218853	540985	8396	Mouse-Gut	6	2.18549e-08	90.8333	189	10	0	0	NA	13
./Marine/ftp.ebi.ac.uk/pub/databases/metagenomics/mgnify_genomes/marine/v1.0/species_catalogue/MGYG0002967/MGYG000296728/genome/MGYG000296728.fna	0.0858384	6	5.16e-10	39.8333	42	39	184981	453649	13340	Marine	3	9.8854e-05	86.3333	169	6	0	0	NA	9
./Mouse-Gut/ftp.ebi.ac.uk/pub/databases/metagenomics/mgnify_genomes/mouse-gut/v1.0/species_catalogue/MGYG0003283/MGYG000328307/genome/MGYG000328307.fna	0.163369	7	5.34e-10	18.4286	40	9	236583	467000	7800	Mouse-Gut	6	2.29597e-08	191.5	302	68	0	0	NA	13
./Human-Gut/pub/databases/metagenomics/mgnify_genomes/human-gut/v2.0/species_catalogue/MGYG0000036/MGYG000003626/genome/MGYG000003626.fna	0.166182	7	6.01e-10	8.57143	20	2	293221	1073745	11028	Human-Gut	7	6.00581e-10	252.714	405	9	0	0	NA	14
./Mouse-Gut/ftp.ebi.ac.uk/pub/databases/metagenomics/mgnify_genomes/mouse-gut/v1.0/species_catalogue/MGYG0004059/MGYG000405972/genome/MGYG000405972.fna	0.0888932	6	6.35e-10	29.3333	35	16	126266	347623	3791	Mouse-Gut	5	4.29561e-08	14.8	28	6	0	0	NA	11
./Human-Gut/pub/databases/metagenomics/mgnify_genomes/human-gut/v2.0/species_catalogue/MGYG0000035/MGYG000003533/genome/MGYG000003533.fna	0.172855	7	7.87e-10	18.5714	34	10	240409	577783	11910	Human-Gut	4	3.24064e-05	123.75	173	88	0	0	NA	11
./Marine/ftp.ebi.ac.uk/pub/databases/metagenomics/mgnify_genomes/marine/v1.0/species_catalogue/MGYG0002972/MGYG000297270/genome/MGYG000297270.fna	0.092868	6	8.23e-10	111.167	204	19	246488	731025	46436	Marine	7	1.08985e-11	206.286	339	57	0	0	NA	13
./Marine/ftp.ebi.ac.uk/pub/databases/metagenomics/mgnify_genomes/marine/v1.0/species_catalogue/MGYG0002967/MGYG000296784/genome/MGYG000296784.fna	0.178223	7	9.7e-10	117.286	170	46	266404	1108611	6648	Marine	6	3.8213e-08	57.1667	82	42	0	0	NA	13
./Mouse-Gut/ftp.ebi.ac.uk/pub/databases/metagenomics/mgnify_genomes/mouse-gut/v1.0/species_catalogue/MGYG0004101/MGYG000410161/genome/MGYG000410161.fna	0.182093	7	1.12e-09	637.571	4420	2	410717	1337574	7277	Mouse-Gut	4	3.96175e-05	137	396	7	0	0	NA	11
./Mouse-Gut/ftp.ebi.ac.uk/pub/databases/metagenomics/mgnify_genomes/mouse-gut/v1.0/species_catalogue/MGYG0003273/MGYG000327352/genome/MGYG000327352.fna	0.101443	6	1.39e-09	33.1667	38	22	85302.5	164613	9348	Mouse-Gut	8	2.5413e-13	58.875	124	7	0	0	NA	14
./Mouse-Gut/ftp.ebi.ac.uk/pub/databases/metagenomics/mgnify_genomes/mouse-gut/v1.0/species_catalogue/MGYG0003306/MGYG000330630/genome/MGYG000330630.fna	0.103346	6	1.55e-09	17.8333	32	5	215434	975087	7667	Mouse-Gut	2	0.00498613	213.5	263	164	0	0	NA	8
./Non-Model-Fish-Gut/ftp.ebi.ac.uk/pub/databases/metagenomics/mgnify_genomes/non-model-fish-gut/v2.0/species_catalogue/MGYG0002996/MGYG000299676/genome/MGYG000299676.fna	0.110446	6	2.29e-09	479	2610	39	253451	689733	53040	Non-Model-Fish-Gut	7	3.61141e-11	151.571	302	58	0	0	NA	13
./Human-Gut/pub/databases/metagenomics/mgnify_genomes/human-gut/v2.0/species_catalogue/MGYG0000045/MGYG000004549/genome/MGYG000004549.fna	0.11167	6	2.45e-09	4617.67	22888	1	283506	980301	57076	Human-Gut	8	5.43121e-13	212.875	315	7	0	0	NA	14
./Human-Gut/pub/databases/metagenomics/mgnify_genomes/human-gut/v2.0/species_catalogue/MGYG0000032/MGYG000003244/genome/MGYG000003244.fna	0.112189	6	2.52e-09	8.5	17	1	252282	549857	9	Human-Gut	20	0	130.7	179	22	0	0	NA	26
./Pig-Gut/ftp.ebi.ac.uk/pub/databases/metagenomics/mgnify_genomes/pig-gut/v1.0/species_catalogue/MGYG0003033/MGYG000303305/genome/MGYG000303305.fna	0.113569	6	2.7e-09	34	40	24	207823	357331	55453	Pig-Gut	11	0	37.1818	82	9	0	0	NA	17
./Human-Gut/pub/databases/metagenomics/mgnify_genomes/human-gut/v2.0/species_catalogue/MGYG0000037/MGYG000003744/genome/MGYG000003744.fna	0.121263	6	3.98e-09	2175.17	12990	2	317840	1007332	21680	Human-Gut	6	3.98064e-09	205.5	388	42	0	0	NA	12
./Mouse-Gut/ftp.ebi.ac.uk/pub/databases/metagenomics/mgnify_genomes/mouse-gut/v1.0/species_catalogue/MGYG0003226/MGYG000322672/genome/MGYG000322672.fna	0.121981	6	4.12e-09	18.1667	35	1	112212	258331	5099	Mouse-Gut	3	0.000276133	33	70	13	31	64	13	9
./Human-Oral/ftp.ebi.ac.uk/pub/databases/metagenomics/mgnify_genomes/human-oral/v1.0/species_catalogue/MGYG0002981/MGYG000298113/genome/MGYG000298113.fna	0.125733	6	4.93e-09	32.5	37	14	279510	506548	31640	Human-Oral	4	9.4188e-06	65.75	88	37	0	0	NA	10
./Human-Gut/pub/databases/metagenomics/mgnify_genomes/human-gut/v2.0/species_catalogue/MGYG0000029/MGYG000002991/genome/MGYG000002991.fna	0.126166	6	5.03e-09	33.5	42	5	323861	656757	2711	Human-Gut	3	0.000304589	18	34	7	0	0	NA	9
./Human-Gut/pub/databases/metagenomics/mgnify_genomes/human-gut/v2.0/species_catalogue/MGYG0000029/MGYG000002968/genome/MGYG000002968.fna	0.126858	6	5.19e-09	26	41	5	258952	541930	33981	Human-Gut	3	0.000309465	67.3333	111	11	0	0	NA	9
./Human-Gut/pub/databases/metagenomics/mgnify_genomes/human-gut/v2.0/species_catalogue/MGYG0000032/MGYG000003259/genome/MGYG000003259.fna	0.131925	6	6.54e-09	19.1667	43	8	354600	848395	84599	Human-Gut	5	2.98395e-07	76.2	124	19	0	0	NA	11
./Human-Gut/pub/databases/metagenomics/mgnify_genomes/human-gut/v2.0/species_catalogue/MGYG0000037/MGYG000003762/genome/MGYG000003762.fna	0.133125	6	6.9e-09	9.66667	14	3	188459	294015	70321	Human-Gut	1	0.124644	260	260	260	0	0	NA	7
./Human-Gut/pub/databases/metagenomics/mgnify_genomes/human-gut/v2.0/species_catalogue/MGYG0000032/MGYG000003245/genome/MGYG000003245.fna	0.133639	6	7.06e-09	19.3333	25	11	363084	641829	31251	Human-Gut	11	0	186.8	277	45	0	0	NA	17
./Pig-Gut/ftp.ebi.ac.uk/pub/databases/metagenomics/mgnify_genomes/pig-gut/v1.0/species_catalogue/MGYG0003032/MGYG000303229/genome/MGYG000303229.fna	0.0627488	5	7.69e-09	31.8	37	21	146605	294642	10464	Pig-Gut	8	5.66214e-15	69.5	93	23	0	0	NA	13
./Human-Gut/pub/databases/metagenomics/mgnify_genomes/human-gut/v2.0/species_catalogue/MGYG0000038/MGYG000003809/genome/MGYG000003809.fna	0.0654895	5	9.51e-09	11	12	10	92519.4	256347	10	Human-Gut	8	7.88258e-15	55.25	89	10	0	0	NA	13
./Mouse-Gut/ftp.ebi.ac.uk/pub/databases/metagenomics/mgnify_genomes/mouse-gut/v1.0/species_catalogue/MGYG0003312/MGYG000331282/genome/MGYG000331282.fna	0.141948	6	1.01e-08	457.667	2638	3	391651	787031	60089	Mouse-Gut	4	1.51043e-05	233.5	325	120	0	0	NA	10
./Pig-Gut/ftp.ebi.ac.uk/pub/databases/metagenomics/mgnify_genomes/pig-gut/v1.0/species_catalogue/MGYG0003014/MGYG000301487/genome/MGYG000301487.fna	0.141932	6	1.01e-08	25.8333	40	8	339682	1210091	76831	Pig-Gut	4	1.50978e-05	145.5	269	23	0	0	NA	10
./Mouse-Gut/ftp.ebi.ac.uk/pub/databases/metagenomics/mgnify_genomes/mouse-gut/v1.0/species_catalogue/MGYG0003238/MGYG000323824/genome/MGYG000323824.fna	0.0670716	5	1.07e-08	21.4	40	8	216478	380574	44430	Mouse-Gut	3	4.7825e-05	148.333	179	110	0	0	NA	8
./Human-Gut/pub/databases/metagenomics/mgnify_genomes/human-gut/v2.0/species_catalogue/MGYG0000034/MGYG000003480/genome/MGYG000003480.fna	0.154397	6	1.65e-08	11.5	20	5	400731	769403	29360	Human-Gut	10	1.88738e-15	84.8	147	22	0	0	NA	16
./Mouse-Gut/ftp.ebi.ac.uk/pub/databases/metagenomics/mgnify_genomes/mouse-gut/v1.0/species_catalogue/MGYG0003478/MGYG000347897/genome/MGYG000347897.fna	0.156499	6	1.78e-08	18	50	3	407144	662848	104182	Mouse-Gut	16	0	278.188	611	18	0	0	NA	22
./Marine/ftp.ebi.ac.uk/pub/databases/metagenomics/mgnify_genomes/marine/v1.0/species_catalogue/MGYG0002960/MGYG000296083/genome/MGYG000296083.fna	0.0752932	5	1.89e-08	22.4	34	2	137324	192406	35253	Marine	0	1	0	0	NA	0	0	NA	5
./Human-Gut/pub/databases/metagenomics/mgnify_genomes/human-gut/v2.0/species_catalogue/MGYG0000034/MGYG000003424/genome/MGYG000003424.fna	0.160769	6	2.09e-08	11.5	21	4	321554	1037242	6523	Human-Gut	3	0.000614189	102.333	140	30	0	0	NA	9
./Human-Gut/pub/databases/metagenomics/mgnify_genomes/human-gut/v2.0/species_catalogue/MGYG0000034/MGYG000003458/genome/MGYG000003458.fna	0.161039	6	2.11e-08	15.6667	25	6	386617	962139	149159	Human-Gut	3	0.000617167	54.3333	80	11	0	0	NA	9
./Human-Gut/pub/databases/metagenomics/mgnify_genomes/human-gut/v2.0/species_catalogue/MGYG0000035/MGYG000003520/genome/MGYG000003520.fna	0.164892	6	2.42e-08	13.8333	21	3	423527	1278122	13231	Human-Gut	4	2.70061e-05	92.75	184	34	0	0	NA	10
./Human-Gut/pub/databases/metagenomics/mgnify_genomes/human-gut/v2.0/species_catalogue/MGYG0000004/MGYG000000498/genome/MGYG000000498.fna	0.0792192	5	2.43e-08	11.4	22	6	145139	371518	1757	Human-Gut	7	3.62488e-12	24.8571	44	3	0	0	NA	12
./Mouse-Gut/ftp.ebi.ac.uk/pub/databases/metagenomics/mgnify_genomes/mouse-gut/v1.0/species_catalogue/MGYG0003227/MGYG000322779/genome/MGYG000322779.fna	0.166092	6	2.53e-08	20.5	37	1	149152	305466	5987	Mouse-Gut	8	1.23936e-11	51.25	113	2	103	214	40	14
./Mouse-Gut/ftp.ebi.ac.uk/pub/databases/metagenomics/mgnify_genomes/mouse-gut/v1.0/species_catalogue/MGYG0003226/MGYG000322631/genome/MGYG000322631.fna	0.167918	6	2.7e-08	24.5	39	3	97301.8	205244	34822	Mouse-Gut	5	9.67522e-07	29.6	62	2	64	145	4	11
./Human-Gut/pub/databases/metagenomics/mgnify_genomes/human-gut/v2.0/species_catalogue/MGYG0000032/MGYG000003233/genome/MGYG000003233.fna	0.173828	6	3.3e-08	16.5	23	9	445284	1848636	67371	Human-Gut	16	0	124.625	255	2	0	0	NA	22
./Human-Gut/pub/databases/metagenomics/mgnify_genomes/human-gut/v2.0/species_catalogue/MGYG0000026/MGYG000002613/genome/MGYG000002613.fna	0.176778	6	3.64e-08	4310.33	16910	16	358661	1263216	42708	Human-Gut	1	0.162034	88	88	88	0	0	NA	7
./Marine/ftp.ebi.ac.uk/pub/databases/metagenomics/mgnify_genomes/marine/v1.0/species_catalogue/MGYG0002965/MGYG000296570/genome/MGYG000296570.fna	0.0860367	5	3.66e-08	17	32	8	262284	1071019	4079	Marine	8	6.89448e-14	94.375	209	27	0	0	NA	13
./Human-Gut/pub/databases/metagenomics/mgnify_genomes/human-gut/v2.0/species_catalogue/MGYG0000037/MGYG000003778/genome/MGYG000003778.fna	0.0864144	5	3.74e-08	6.8	18	3	206102	657658	17738	Human-Gut	4	2.16847e-06	162	289	28	0	0	NA	9
./Pig-Gut/ftp.ebi.ac.uk/pub/databases/metagenomics/mgnify_genomes/pig-gut/v1.0/species_catalogue/MGYG0003018/MGYG000301841/genome/MGYG000301841.fna	0.178179	6	3.82e-08	12234	73268	9	493061	1209828	191068	Pig-Gut	3	0.000825365	57	109	2	0	0	NA	9
./Human-Gut/pub/databases/metagenomics/mgnify_genomes/human-gut/v2.0/species_catalogue/MGYG0000026/MGYG000002650/genome/MGYG000002650.fna	0.180958	6	4.18e-08	3593.17	17579	3	476801	714871	158593	Human-Gut	1	0.165529	282	282	282	0	0	NA	7
./Honeybee-Gut/ftp.ebi.ac.uk/pub/databases/metagenomics/mgnify_genomes/honeybee-gut/v1.0/species_catalogue/MGYG0003212/MGYG000321272/genome/MGYG000321272.fna	0.183403	6	4.52e-08	33.6667	39	23	286758	652336	9000	Honeybee-Gut	11	2.22045e-16	23.2727	51	6	0	0	NA	17
./Human-Gut/pub/databases/metagenomics/mgnify_genomes/human-gut/v2.0/species_catalogue/MGYG0000032/MGYG000003273/genome/MGYG000003273.fna	0.0904042	5	4.67e-08	13.2	26	2	216463	589173	43756	Human-Gut	5	4.66743e-08	414.4	635	244	0	0	NA	10
./Mouse-Gut/ftp.ebi.ac.uk/pub/databases/metagenomics/mgnify_genomes/mouse-gut/v1.0/species_catalogue/MGYG0003313/MGYG000331365/genome/MGYG000331365.fna	0.0914571	5	4.94e-08	24.6	55	4	251003	981952	18407	Mouse-Gut	7	9.80294e-12	111.857	193	20	0	0	NA	12
./Non-Model-Fish-Gut/ftp.ebi.ac.uk/pub/databases/metagenomics/mgnify_genomes/non-model-fish-gut/v2.0/species_catalogue/MGYG0002995/MGYG000299565/genome/MGYG000299565.fna	0.094202	5	5.72e-08	35.6	39	34	282012	655279	6879	Non-Model-Fish-Gut	1	0.0899011	157	157	157	0	0	NA	6
./Mouse-Gut/ftp.ebi.ac.uk/pub/databases/metagenomics/mgnify_genomes/mouse-gut/v1.0/species_catalogue/MGYG0004106/MGYG000410645/genome/MGYG000410645.fna	0.096073	5	6.3e-08	7.2	18	1	301754	565351	46932	Mouse-Gut	2	0.00432981	214.5	278	151	0	0	NA	7
./Human-Gut/pub/databases/metagenomics/mgnify_genomes/human-gut/v2.0/species_catalogue/MGYG0000034/MGYG000003417/genome/MGYG000003417.fna	0.197527	6	6.97e-08	11.5	19	5	503344	1378875	6	Human-Gut	2	0.0171201	93.5	137	50	0	0	NA	8
./Non-Model-Fish-Gut/ftp.ebi.ac.uk/pub/databases/metagenomics/mgnify_genomes/non-model-fish-gut/v2.0/species_catalogue/MGYG0002996/MGYG000299680/genome/MGYG000299680.fna	0.197913	6	7.05e-08	1666.5	9842	24	220227	576319	24599	Non-Model-Fish-Gut	1	0.179559	51	51	51	0	0	NA	7
./Mouse-Gut/ftp.ebi.ac.uk/pub/databases/metagenomics/mgnify_genomes/mouse-gut/v1.0/species_catalogue/MGYG0003225/MGYG000322542/genome/MGYG000322542.fna	0.203412	6	8.27e-08	28704.5	156806	31	18478.2	86120	23	Mouse-Gut	6	8.26696e-08	31.6667	69	4	275.5	421	73	12
./Human-Gut/pub/databases/metagenomics/mgnify_genomes/human-gut/v2.0/species_catalogue/MGYG0000036/MGYG000003617/genome/MGYG000003617.fna	0.10381	5	9.21e-08	6	9	2	345994	643274	83888	Human-Gut	19	0	72.6842	135	4	0	0	NA	24
./Human-Gut/pub/databases/metagenomics/mgnify_genomes/human-gut/v2.0/species_catalogue/MGYG0000039/MGYG000003915/genome/MGYG000003915.fna	0.104442	5	9.49e-08	38	41	35	315532	615597	3129	Human-Gut	4	4.56113e-06	56.5	119	27	0	0	NA	9
./Mouse-Gut/ftp.ebi.ac.uk/pub/databases/metagenomics/mgnify_genomes/mouse-gut/v1.0/species_catalogue/MGYG0003272/MGYG000327215/genome/MGYG000327215.fna	0.106998	5	1.07e-07	34	35	33	196969	387910	19230	Mouse-Gut	7	2.90115e-11	46.2857	103	7	0	0	NA	12
./Mouse-Gut/ftp.ebi.ac.uk/pub/databases/metagenomics/mgnify_genomes/mouse-gut/v1.0/species_catalogue/MGYG0003310/MGYG000331087/genome/MGYG000331087.fna	0.107219	5	1.08e-07	25	57	4	281828	792060	33219	Mouse-Gut	6	1.925e-09	57.6667	112	2	0	0	NA	11
./Human-Gut/pub/databases/metagenomics/mgnify_genomes/human-gut/v2.0/species_catalogue/MGYG0000033/MGYG000003392/genome/MGYG000003392.fna	0.107803	5	1.11e-07	11.8	18	7	213684	406639	35708	Human-Gut	5	1.10922e-07	90.4	157	23	0	0	NA	10
./Marine/ftp.ebi.ac.uk/pub/databases/metagenomics/mgnify_genomes/marine/v1.0/species_catalogue/MGYG0002963/MGYG000296312/genome/MGYG000296312.fna	0.214464	6	1.12e-07	526.667	3048	17	365893	1029037	98001	Marine	6	1.12489e-07	317	581	20	0	0	NA	12
./Pig-Gut/ftp.ebi.ac.uk/pub/databases/metagenomics/mgnify_genomes/pig-gut/v1.0/species_catalogue/MGYG0003021/MGYG000302108/genome/MGYG000302108.fna	0.109386	5	1.19e-07	28.4	40	17	359429	636595	141087	Pig-Gut	7	3.37875e-11	146.571	332	38	0	0	NA	12
./Human-Gut/pub/databases/metagenomics/mgnify_genomes/human-gut/v2.0/species_catalogue/MGYG0000038/MGYG000003804/genome/MGYG000003804.fna	0.109839	5	1.22e-07	3.6	5	1	294488	588604	59078	Human-Gut	5	1.2159e-07	362.2	547	39	0	0	NA	10
./Mouse-Gut/ftp.ebi.ac.uk/pub/databases/metagenomics/mgnify_genomes/mouse-gut/v1.0/species_catalogue/MGYG0003311/MGYG000331130/genome/MGYG000331130.fna	0.111986	5	1.34e-07	395.4	1897	7	244169	655476	13583	Mouse-Gut	2	0.0058214	50	65	35	0	0	NA	7
./Mouse-Gut/ftp.ebi.ac.uk/pub/databases/metagenomics/mgnify_genomes/mouse-gut/v1.0/species_catalogue/MGYG0003312/MGYG000331274/genome/MGYG000331274.fna	0.112492	5	1.37e-07	32	64	2	163736	650712	10040	Mouse-Gut	2	0.00587218	146.5	158	135	0	0	NA	7
./Non-Model-Fish-Gut/ftp.ebi.ac.uk/pub/databases/metagenomics/mgnify_genomes/non-model-fish-gut/v2.0/species_catalogue/MGYG0002996/MGYG000299691/genome/MGYG000299691.fna	0.222056	6	1.38e-07	4655.33	22880	36	453360	826446	4904	Non-Model-Fish-Gut	7	4.35066e-09	106	211	46	0	0	NA	13
./Marine/ftp.ebi.ac.uk/pub/databases/metagenomics/mgnify_genomes/marine/v1.0/species_catalogue/MGYG0002962/MGYG000296277/genome/MGYG000296277.fna	0.112758	5	1.38e-07	16.2	32	3	268537	887509	2042	Marine	7	4.16663e-11	212.286	398	9	0	0	NA	12
./Mouse-Gut/ftp.ebi.ac.uk/pub/databases/metagenomics/mgnify_genomes/mouse-gut/v1.0/species_catalogue/MGYG0003243/MGYG000324345/genome/MGYG000324345.fna	0.225402	6	1.5e-07	22.5	39	8	570978	1334682	109818	Mouse-Gut	3	0.00161334	158.667	291	21	0	0	NA	9
./Pig-Gut/ftp.ebi.ac.uk/pub/databases/metagenomics/mgnify_genomes/pig-gut/v1.0/species_catalogue/MGYG0003031/MGYG000303177/genome/MGYG000303177.fna	0.115138	5	1.53e-07	32.4	34	29	13361	21781	4604	Pig-Gut	4	6.67951e-06	43.75	50	39	0	0	NA	9
./Human-Gut/pub/databases/metagenomics/mgnify_genomes/human-gut/v2.0/species_catalogue/MGYG0000004/MGYG000000480/genome/MGYG000000480.fna	0.115594	5	1.56e-07	14	26	2	149853	519749	29616	Human-Gut	6	3.00121e-09	32.5	57	9	0	0	NA	11
./Marine/ftp.ebi.ac.uk/pub/databases/metagenomics/mgnify_genomes/marine/v1.0/species_catalogue/MGYG0002960/MGYG000296049/genome/MGYG000296049.fna	0.228278	6	1.62e-07	356.5	2051	4	319486	1354953	11475	Marine	4	9.43283e-05	358	620	64	0	0	NA	10
./Human-Oral/ftp.ebi.ac.uk/pub/databases/metagenomics/mgnify_genomes/human-oral/v1.0/species_catalogue/MGYG0002980/MGYG000298083/genome/MGYG000298083.fna	0.117778	5	1.71e-07	30.2	35	19	267295	825030	16933	Human-Oral	4	7.29797e-06	26	50	5	0	0	NA	9
./Human-Gut/pub/databases/metagenomics/mgnify_genomes/human-gut/v2.0/species_catalogue/MGYG0000032/MGYG000003212/genome/MGYG000003212.fna	0.118385	5	1.76e-07	11	16	2	375430	837197	41484	Human-Gut	4	7.44608e-06	224.25	378	56	0	0	NA	9
./Pig-Gut/ftp.ebi.ac.uk/pub/databases/metagenomics/mgnify_genomes/pig-gut/v1.0/species_catalogue/MGYG0003031/MGYG000303171/genome/MGYG000303171.fna	0.118576	5	1.77e-07	34.2	40	22	122951	322777	26708	Pig-Gut	5	1.76987e-07	61.2	84	32	0	0	NA	10
./Human-Gut/pub/databases/metagenomics/mgnify_genomes/human-gut/v2.0/species_catalogue/MGYG0000036/MGYG000003611/genome/MGYG000003611.fna	0.118822	5	1.79e-07	7	20	1	347371	591966	43632	Human-Gut	7	5.98058e-11	59.4286	102	15	0	0	NA	12
./Marine/ftp.ebi.ac.uk/pub/databases/metagenomics/mgnify_genomes/marine/v1.0/species_catalogue/MGYG0002971/MGYG000297163/genome/MGYG000297163.fna	0.232568	6	1.8e-07	101.333	177	41	198837	545540	40511	Marine	9	4.45022e-12	360.333	621	43	0	0	NA	15
./Mouse-Gut/ftp.ebi.ac.uk/pub/databases/metagenomics/mgnify_genomes/mouse-gut/v1.0/species_catalogue/MGYG0003273/MGYG000327334/genome/MGYG000327334.fna	0.234335	6	1.88e-07	27.6667	36	15	419317	856658	12704	Mouse-Gut	6	1.88212e-07	128.167	200	34	0	0	NA	12
./Mouse-Gut/ftp.ebi.ac.uk/pub/databases/metagenomics/mgnify_genomes/mouse-gut/v1.0/species_catalogue/MGYG0003313/MGYG000331318/genome/MGYG000331318.fna	0.119996	5	1.88e-07	22.6	41	2	223045	385700	107228	Mouse-Gut	6	3.74153e-09	73.1667	101	42	0	0	NA	11
./Marine/ftp.ebi.ac.uk/pub/databases/metagenomics/mgnify_genomes/marine/v1.0/species_catalogue/MGYG0002974/MGYG000297428/genome/MGYG000297428.fna	0.124826	5	2.28e-07	10.8	26	2	266578	1015660	6177	Marine	2	0.0071718	117.5	196	39	0	0	NA	7
./Human-Gut/pub/databases/metagenomics/mgnify_genomes/human-gut/v2.0/species_catalogue/MGYG0000037/MGYG000003792/genome/MGYG000003792.fna	0.127624	5	2.54e-07	12.4	18	6	266267	453435	75348	Human-Gut	3	0.000314927	281	324	243	0	0	NA	8
./Human-Gut/pub/databases/metagenomics/mgnify_genomes/human-gut/v2.0/species_catalogue/MGYG0000032/MGYG000003225/genome/MGYG000003225.fna	0.129519	5	2.73e-07	11.4	21	3	240836	533303	57329	Human-Gut	7	1.08326e-10	80.5714	114	4	0	0	NA	12
./Human-Gut/pub/databases/metagenomics/mgnify_genomes/human-gut/v2.0/species_catalogue/MGYG0000034/MGYG000003463/genome/MGYG000003463.fna	0.1303	5	2.81e-07	2799.2	13941	4	354161	582553	3606	Human-Gut	15	0	72.8	131	9	0	0	NA	20
./Human-Gut/pub/databases/metagenomics/mgnify_genomes/human-gut/v2.0/species_catalogue/MGYG0000039/MGYG000003919/genome/MGYG000003919.fna	0.130421	5	2.82e-07	26.4	37	6	387641	806818	166139	Human-Gut	5	2.82118e-07	126.8	184	30	0	0	NA	10
./Non-Model-Fish-Gut/ftp.ebi.ac.uk/pub/databases/metagenomics/mgnify_genomes/non-model-fish-gut/v2.0/species_catalogue/MGYG0002995/MGYG000299576/genome/MGYG000299576.fna	0.130555	5	2.84e-07	35.6	38	26	233230	529552	16165	Non-Model-Fish-Gut	5	2.83533e-07	93.2	123	66	0	0	NA	10
./Mouse-Gut/ftp.ebi.ac.uk/pub/databases/metagenomics/mgnify_genomes/mouse-gut/v1.0/species_catalogue/MGYG0003311/MGYG000331120/genome/MGYG000331120.fna	0.0522829	4	2.99e-07	45	76	6	156783	284333	60	Mouse-Gut	6	2.71251e-11	104.667	190	15	0	0	NA	10
./Mouse-Gut/ftp.ebi.ac.uk/pub/databases/metagenomics/mgnify_genomes/mouse-gut/v1.0/species_catalogue/MGYG0003231/MGYG000323124/genome/MGYG000323124.fna	0.138557	5	3.79e-07	19.2	38	8	201738	365273	85625	Mouse-Gut	2	0.00875677	159.5	196	123	0	0	NA	7
./Marine/ftp.ebi.ac.uk/pub/databases/metagenomics/mgnify_genomes/marine/v1.0/species_catalogue/MGYG0002963/MGYG000296341/genome/MGYG000296341.fna	0.138785	5	3.82e-07	37.6	39	36	200648	348400	69303	Marine	5	3.82283e-07	276.6	400	146	0	0	NA	10
./Mouse-Gut/ftp.ebi.ac.uk/pub/databases/metagenomics/mgnify_genomes/mouse-gut/v1.0/species_catalogue/MGYG0003226/MGYG000322634/genome/MGYG000322634.fna	0.138998	5	3.85e-07	21.8	34	8	67902.8	227562	14261	Mouse-Gut	8	3.05445e-12	52.125	94	14	67.6	121	7	13
./Pig-Gut/ftp.ebi.ac.uk/pub/databases/metagenomics/mgnify_genomes/pig-gut/v1.0/species_catalogue/MGYG0003033/MGYG000303314/genome/MGYG000303314.fna	0.13993	5	3.98e-07	30	38	3	377622	1102789	26160	Pig-Gut	6	9.24937e-09	34.8333	54	10	0	0	NA	11
./Human-Gut/pub/databases/metagenomics/mgnify_genomes/human-gut/v2.0/species_catalogue/MGYG0000004/MGYG000000490/genome/MGYG000000490.fna	0.141127	5	4.15e-07	10.4	21	2	393723	1494190	5033	Human-Gut	2	0.0090693	25	41	9	0	0	NA	7
./Human-Gut/pub/databases/metagenomics/mgnify_genomes/human-gut/v2.0/species_catalogue/MGYG0000032/MGYG000003270/genome/MGYG000003270.fna	0.141361	5	4.18e-07	31.2	57	8	448411	944295	175872	Human-Gut	8	3.4881e-12	515	1038	32	0	0	NA	13
./Non-Model-Fish-Gut/ftp.ebi.ac.uk/pub/databases/metagenomics/mgnify_genomes/non-model-fish-gut/v2.0/species_catalogue/MGYG0002995/MGYG000299528/genome/MGYG000299528.fna	0.141955	5	4.27e-07	944	4578	32	257061	706292	3888	Non-Model-Fish-Gut	5	4.26861e-07	38.4	74	18	0	0	NA	10
./Human-Gut/pub/databases/metagenomics/mgnify_genomes/human-gut/v2.0/species_catalogue/MGYG0000012/MGYG000001252/genome/MGYG000001252.fna	0.143849	5	4.55e-07	2258	7690	2	390839	511324	266495	Human-Gut	7	2.23006e-10	183.429	380	5	0	0	NA	12
./Mouse-Gut/ftp.ebi.ac.uk/pub/databases/metagenomics/mgnify_genomes/mouse-gut/v1.0/species_catalogue/MGYG0003310/MGYG000331096/genome/MGYG000331096.fna	0.147475	5	5.14e-07	14.2	38	2	383003	1529994	14921	Mouse-Gut	1	0.137116	111	111	111	0	0	NA	6
./Non-Model-Fish-Gut/ftp.ebi.ac.uk/pub/databases/metagenomics/mgnify_genomes/non-model-fish-gut/v2.0/species_catalogue/MGYG0002995/MGYG000299512/genome/MGYG000299512.fna	0.148321	5	5.29e-07	31.8	39	24	478347	1168012	75121	Non-Model-Fish-Gut	10	1.22125e-15	64.8	114	11	0	0	NA	15
./Mouse-Gut/ftp.ebi.ac.uk/pub/databases/metagenomics/mgnify_genomes/mouse-gut/v1.0/species_catalogue/MGYG0003313/MGYG000331307/genome/MGYG000331307.fna	0.150129	5	5.61e-07	23	39	1	68264.8	143941	17671	Mouse-Gut	3	0.000504114	109.667	147	75	0	0	NA	8
./Human-Gut/pub/databases/metagenomics/mgnify_genomes/human-gut/v2.0/species_catalogue/MGYG0000026/MGYG000002625/genome/MGYG000002625.fna	0.15046	5	5.67e-07	19.8	29	12	75478.6	231127	7801	Human-Gut	5	5.66984e-07	63	114	10	0	0	NA	10
./Human-Gut/pub/databases/metagenomics/mgnify_genomes/human-gut/v2.0/species_catalogue/MGYG0000029/MGYG000002982/genome/MGYG000002982.fna	0.0618186	4	5.79e-07	18.75	29	12	145748	198167	117300	Human-Gut	2	0.00183382	120	191	49	0	0	NA	6
./Non-Model-Fish-Gut/ftp.ebi.ac.uk/pub/databases/metagenomics/mgnify_genomes/non-model-fish-gut/v2.0/species_catalogue/MGYG0002995/MGYG000299564/genome/MGYG000299564.fna	0.151686	5	5.9e-07	24.6	38	11	451212	987573	10291	Non-Model-Fish-Gut	5	5.89853e-07	67.6	122	7	0	0	NA	10
./Mouse-Gut/ftp.ebi.ac.uk/pub/databases/metagenomics/mgnify_genomes/mouse-gut/v1.0/species_catalogue/MGYG0003238/MGYG000323898/genome/MGYG000323898.fna	0.0632135	4	6.33e-07	12.75	21	2	254166	647656	15395	Mouse-Gut	0	1	0	0	NA	0	0	NA	4
./Human-Gut/pub/databases/metagenomics/mgnify_genomes/human-gut/v2.0/species_catalogue/MGYG0000010/MGYG000001073/genome/MGYG000001073.fna	0.154514	5	6.45e-07	2	3	1	332673	702172	4185	Human-Gut	3	0.000547799	155.333	258	99	0	0	NA	8
./Mouse-Gut/ftp.ebi.ac.uk/pub/databases/metagenomics/mgnify_genomes/mouse-gut/v1.0/species_catalogue/MGYG0003309/MGYG000330961/genome/MGYG000330961.fna	0.159946	5	7.64e-07	45.8	109	26	389315	1500661	35678	Mouse-Gut	6	2.02795e-08	103.833	156	30	0	0	NA	11
./Mouse-Gut/ftp.ebi.ac.uk/pub/databases/metagenomics/mgnify_genomes/mouse-gut/v1.0/species_catalogue/MGYG0003631/MGYG000363154/genome/MGYG000363154.fna	0.0670938	4	8e-07	1416.5	5585	3	17262.2	31025	4	Mouse-Gut	6	1.19619e-10	29.8333	55	4	63.25	103	7	10
./Human-Gut/pub/databases/metagenomics/mgnify_genomes/human-gut/v2.0/species_catalogue/MGYG0000035/MGYG000003513/genome/MGYG000003513.fna	0.161974	5	8.12e-07	9.8	25	2	442078	831260	107034	Human-Gut	1	0.149537	268	268	268	0	0	NA	6
./Human-Gut/pub/databases/metagenomics/mgnify_genomes/human-gut/v2.0/species_catalogue/MGYG0000016/MGYG000001641/genome/MGYG000001641.fna	0.168212	5	9.76e-07	5.8	12	3	465911	2191948	5229	Human-Gut	15	0	49.5333	80	5	0	0	NA	20
./Human-Gut/pub/databases/metagenomics/mgnify_genomes/human-gut/v2.0/species_catalogue/MGYG0000034/MGYG000003423/genome/MGYG000003423.fna	0.168266	5	9.77e-07	12.6	21	7	557641	1137153	285852	Human-Gut	7	6.54161e-10	43.5714	91	3	0	0	NA	12
./Human-Gut/pub/databases/metagenomics/mgnify_genomes/human-gut/v2.0/species_catalogue/MGYG0000005/MGYG000000555/genome/MGYG000000555.fna	0.170438	5	1.04e-06	4209	15111	4	472248	1026378	59239	Human-Gut	0	1	0	0	NA	0	0	NA	5
./Mouse-Gut/ftp.ebi.ac.uk/pub/databases/metagenomics/mgnify_genomes/mouse-gut/v1.0/species_catalogue/MGYG0003226/MGYG000322694/genome/MGYG000322694.fna	0.172703	5	1.11e-06	555.8	2679	8	164385	363319	24	Mouse-Gut	7	7.81829e-10	29.5714	46	3	64	115	37	12
./Marine/ftp.ebi.ac.uk/pub/databases/metagenomics/mgnify_genomes/marine/v1.0/species_catalogue/MGYG0002965/MGYG000296573/genome/MGYG000296573.fna	0.324707	6	1.23e-06	1631.33	4985	23	747013	2484275	219981	Marine	1	0.277261	343	343	343	0	0	NA	7
./Human-Oral/ftp.ebi.ac.uk/pub/databases/metagenomics/mgnify_genomes/human-oral/v1.0/species_catalogue/MGYG0002986/MGYG000298605/genome/MGYG000298605.fna	0.0771461	4	1.39e-06	33	72	7	304444	470799	130398	Human-Oral	1	0.0742454	25	25	25	0	0	NA	5
./Mouse-Gut/ftp.ebi.ac.uk/pub/databases/metagenomics/mgnify_genomes/mouse-gut/v1.0/species_catalogue/MGYG0003226/MGYG000322639/genome/MGYG000322639.fna	0.181383	5	1.41e-06	21.8	38	1	92606	285183	14683	Mouse-Gut	4	3.90258e-05	78.25	104	28	337	469	205	9
./Human-Gut/pub/databases/metagenomics/mgnify_genomes/human-gut/v2.0/species_catalogue/MGYG0000030/MGYG000003009/genome/MGYG000003009.fna	0.0778419	4	1.44e-06	23	41	4	223456	655206	2914	Human-Gut	8	3.11973e-14	152.625	258	4	0	0	NA	12
./Human-Gut/pub/databases/metagenomics/mgnify_genomes/human-gut/v2.0/species_catalogue/MGYG0000005/MGYG000000552/genome/MGYG000000552.fna	0.0779793	4	1.45e-06	140.75	493	5	319732	1021498	26872	Human-Gut	1	0.0750164	31	31	31	0	0	NA	5
./Human-Gut/pub/databases/metagenomics/mgnify_genomes/human-gut/v2.0/species_catalogue/MGYG0000015/MGYG000001540/genome/MGYG000001540.fna	0.183817	5	1.5e-06	434508	990304	115963	176017	715830	3905	Human-Gut	4	4.10832e-05	3.5	4	3	1391.5	2017	993	9
./Mouse-Gut/ftp.ebi.ac.uk/pub/databases/metagenomics/mgnify_genomes/mouse-gut/v1.0/species_catalogue/MGYG0003230/MGYG000323028/genome/MGYG000323028.fna	0.186162	5	1.6e-06	27.4	38	2	274531	519500	21083	Mouse-Gut	4	4.31397e-05	94.5	142	4	0	0	NA	9
./Human-Gut/pub/databases/metagenomics/mgnify_genomes/human-gut/v2.0/species_catalogue/MGYG0000035/MGYG000003547/genome/MGYG000003547.fna	0.0813588	4	1.71e-06	8.75	19	2	242352	521203	10	Human-Gut	5	2.77605e-08	56.4	95	25	0	0	NA	9
./Marine/ftp.ebi.ac.uk/pub/databases/metagenomics/mgnify_genomes/marine/v1.0/species_catalogue/MGYG0002973/MGYG000297383/genome/MGYG000297383.fna	0.190801	5	1.8e-06	1177.6	5799	15	361574	575079	103760	Marine	3	0.00100402	238	398	73	0	0	NA	8
./Mouse-Gut/ftp.ebi.ac.uk/pub/databases/metagenomics/mgnify_genomes/mouse-gut/v1.0/species_catalogue/MGYG0003293/MGYG000329337/genome/MGYG000329337.fna	0.191802	5	1.84e-06	32096	67564	2933	604482	1140879	297647	Mouse-Gut	3	0.00101914	30.6667	71	8	0	0	NA	8
./Mouse-Gut/ftp.ebi.ac.uk/pub/databases/metagenomics/mgnify_genomes/mouse-gut/v1.0/species_catalogue/MGYG0003310/MGYG000331089/genome/MGYG000331089.fna	0.0908614	4	2.64e-06	857.25	3318	21	227808	339401	70103	Mouse-Gut	3	0.000116805	61.6667	97	38	0	0	NA	7
./Human-Gut/pub/databases/metagenomics/mgnify_genomes/human-gut/v2.0/species_catalogue/MGYG0000036/MGYG000003628/genome/MGYG000003628.fna	0.0922153	4	2.8e-06	16.5	30	2	140942	243170	72548	Human-Gut	4	2.79905e-06	36.25	49	11	0	0	NA	8
./Mouse-Gut/ftp.ebi.ac.uk/pub/databases/metagenomics/mgnify_genomes/mouse-gut/v1.0/species_catalogue/MGYG0003312/MGYG000331298/genome/MGYG000331298.fna	0.0924607	4	2.83e-06	33	81	9	257676	539037	63006	Mouse-Gut	1	0.088315	111	111	111	0	0	NA	5
./Non-Model-Fish-Gut/ftp.ebi.ac.uk/pub/databases/metagenomics/mgnify_genomes/non-model-fish-gut/v2.0/species_catalogue/MGYG0002996/MGYG000299678/genome/MGYG000299678.fna	0.0935534	4	2.96e-06	60.25	116	39	320522	1102017	21833	Non-Model-Fish-Gut	1	0.0893106	29	29	29	0	0	NA	5
./Human-Gut/pub/databases/metagenomics/mgnify_genomes/human-gut/v2.0/species_catalogue/MGYG0000016/MGYG000001650/genome/MGYG000001650.fna	0.0945957	4	3.09e-06	5.25	9	1	57710	179268	11286	Human-Gut	4	3.09357e-06	100.5	179	67	0	0	NA	8
./Human-Gut/pub/databases/metagenomics/mgnify_genomes/human-gut/v2.0/species_catalogue/MGYG0000037/MGYG000003727/genome/MGYG000003727.fna	0.0953076	4	3.19e-06	12.75	16	11	104067	257071	11037	Human-Gut	3	0.000134357	16	22	6	0	0	NA	7
./Human-Gut/pub/databases/metagenomics/mgnify_genomes/human-gut/v2.0/species_catalogue/MGYG0000027/MGYG000002786/genome/MGYG000002786.fna	0.0957435	4	3.24e-06	5.25	10	1	78268	260039	7671	Human-Gut	5	6.1909e-08	18.2	26	10	0	0	NA	9
./Mouse-Gut/ftp.ebi.ac.uk/pub/databases/metagenomics/mgnify_genomes/mouse-gut/v1.0/species_catalogue/MGYG0003268/MGYG000326833/genome/MGYG000326833.fna	0.0961786	4	3.3e-06	25.5	40	3	63231.2	126746	21615	Mouse-Gut	5	6.33057e-08	18.8	42	4	0	0	NA	9
./Pig-Gut/ftp.ebi.ac.uk/pub/databases/metagenomics/mgnify_genomes/pig-gut/v1.0/species_catalogue/MGYG0003018/MGYG000301810/genome/MGYG000301810.fna	0.0963836	4	3.33e-06	28	37	4	334675	787185	5096	Pig-Gut	2	0.00435696	48.5	51	46	0	0	NA	6
./Mouse-Gut/ftp.ebi.ac.uk/pub/databases/metagenomics/mgnify_genomes/mouse-gut/v1.0/species_catalogue/MGYG0003306/MGYG000330617/genome/MGYG000330617.fna	0.0971617	4	3.44e-06	17	39	2	267903	722589	7646	Mouse-Gut	2	0.0044253	162	257	67	0	0	NA	6
./Human-Gut/pub/databases/metagenomics/mgnify_genomes/human-gut/v2.0/species_catalogue/MGYG0000034/MGYG000003481/genome/MGYG000003481.fna	0.0980903	4	3.57e-06	9.75	14	7	369886	751441	171268	Human-Gut	3	0.000146169	48.3333	54	44	0	0	NA	7
./Mouse-Gut/ftp.ebi.ac.uk/pub/databases/metagenomics/mgnify_genomes/mouse-gut/v1.0/species_catalogue/MGYG0003312/MGYG000331279/genome/MGYG000331279.fna	0.220848	5	3.64e-06	29.4	44	18	247662	767307	38	Mouse-Gut	7	4.19203e-09	100.143	158	31	0	0	NA	12
./Human-Oral/ftp.ebi.ac.uk/pub/databases/metagenomics/mgnify_genomes/human-oral/v1.0/species_catalogue/MGYG0002990/MGYG000299041/genome/MGYG000299041.fna	0.098712	4	3.66e-06	19.5	32	11	233047	496418	71391	Human-Oral	2	0.00456297	164	244	84	0	0	NA	6
./Human-Gut/pub/databases/metagenomics/mgnify_genomes/human-gut/v2.0/species_catalogue/MGYG0000025/MGYG000002574/genome/MGYG000002574.fna	0.221906	5	3.73e-06	3564.2	10858	4	626671	1795503	76285	Human-Gut	2	0.0212647	465.5	537	394	0	0	NA	7
./Human-Gut/pub/databases/metagenomics/mgnify_genomes/human-gut/v2.0/species_catalogue/MGYG0000037/MGYG000003797/genome/MGYG000003797.fna	0.0995563	4	3.78e-06	1361	5422	3	314524	683881	119745	Human-Gut	3	0.000152654	126	220	63	0	0	NA	7
./Human-Gut/pub/databases/metagenomics/mgnify_genomes/human-gut/v2.0/species_catalogue/MGYG0000034/MGYG000003422/genome/MGYG000003422.fna	0.100298	4	3.89e-06	13.5	21	5	357998	684039	40140	Human-Gut	2	0.00470581	83.5	85	82	0	0	NA	6
./Human-Gut/pub/databases/metagenomics/mgnify_genomes/human-gut/v2.0/species_catalogue/MGYG0000034/MGYG000003497/genome/MGYG000003497.fna	0.100676	4	3.95e-06	18	29	10	384986	785618	106170	Human-Gut	6	1.32669e-09	110.5	191	9	0	0	NA	10
./Mouse-Gut/ftp.ebi.ac.uk/pub/databases/metagenomics/mgnify_genomes/mouse-gut/v1.0/species_catalogue/MGYG0003231/MGYG000323103/genome/MGYG000323103.fna	0.102692	4	4.27e-06	24.75	39	13	142428	339936	47123	Mouse-Gut	3	0.000167144	234.333	261	195	0	0	NA	7
./Human-Gut/pub/databases/metagenomics/mgnify_genomes/human-gut/v2.0/species_catalogue/MGYG0000037/MGYG000003717/genome/MGYG000003717.fna	0.104472	4	4.57e-06	12.25	18	7	242966	616774	19918	Human-Gut	3	0.000175758	33.3333	66	14	0	0	NA	7
./Marine/ftp.ebi.ac.uk/pub/databases/metagenomics/mgnify_genomes/marine/v1.0/species_catalogue/MGYG0002961/MGYG000296131/genome/MGYG000296131.fna	0.23231	5	4.65e-06	28.2	42	3	467116	1403828	138868	Marine	1	0.207299	269	269	269	0	0	NA	6
./Mouse-Gut/ftp.ebi.ac.uk/pub/databases/metagenomics/mgnify_genomes/mouse-gut/v1.0/species_catalogue/MGYG0003769/MGYG000376978/genome/MGYG000376978.fna	0.105319	4	4.71e-06	15.25	31	1	360696	762772	31	Mouse-Gut	10	0	35.4	78	9	0	0	NA	14
./Mouse-Gut/ftp.ebi.ac.uk/pub/databases/metagenomics/mgnify_genomes/mouse-gut/v1.0/species_catalogue/MGYG0003309/MGYG000330945/genome/MGYG000330945.fna	0.106923	4	5e-06	25.25	38	9	361602	897846	50638	Mouse-Gut	10	0	92.2	186	5	0	0	NA	14
./Human-Oral/ftp.ebi.ac.uk/pub/databases/metagenomics/mgnify_genomes/human-oral/v1.0/species_catalogue/MGYG0002990/MGYG000299080/genome/MGYG000299080.fna	0.0337285	3	6.24e-06	1787.33	5311	19	170853	371872	45932	Human-Oral	0	1	0	0	NA	0	0	NA	3
./Marine/ftp.ebi.ac.uk/pub/databases/metagenomics/mgnify_genomes/marine/v1.0/species_catalogue/MGYG0002966/MGYG000296641/genome/MGYG000296641.fna	0.247765	5	6.33e-06	31.8	42	19	594636	1818649	37566	Marine	6	2.59949e-07	212.333	287	79	0	0	NA	11
./Human-Gut/pub/databases/metagenomics/mgnify_genomes/human-gut/v2.0/species_catalogue/MGYG0000020/MGYG000002092/genome/MGYG000002092.fna	0.114574	4	6.55e-06	32.25	41	13	144281	391719	3159	Human-Gut	0	1	0	0	NA	0	0	NA	4
./Human-Gut/pub/databases/metagenomics/mgnify_genomes/human-gut/v2.0/species_catalogue/MGYG0000034/MGYG000003450/genome/MGYG000003450.fna	0.114709	4	6.58e-06	23444.5	56707	25	420474	1256345	96490	Human-Gut	4	6.58258e-06	46	57	35	0	0	NA	8
./Mouse-Gut/ftp.ebi.ac.uk/pub/databases/metagenomics/mgnify_genomes/mouse-gut/v1.0/species_catalogue/MGYG0003226/MGYG000322689/genome/MGYG000322689.fna	0.115699	4	6.81e-06	31.75	36	19	139519	295283	17693	Mouse-Gut	4	6.80738e-06	45.25	66	31	73	76	70	8
./Mouse-Gut/ftp.ebi.ac.uk/pub/databases/metagenomics/mgnify_genomes/mouse-gut/v1.0/species_catalogue/MGYG0003225/MGYG000322595/genome/MGYG000322595.fna	0.254474	5	7.2e-06	24092.6	76480	33	170601	648126	2	Mouse-Gut	10	2.49023e-13	35.6667	78	2	203.125	313	4	15
./Mouse-Gut/ftp.ebi.ac.uk/pub/databases/metagenomics/mgnify_genomes/mouse-gut/v1.0/species_catalogue/MGYG0003284/MGYG000328451/genome/MGYG000328451.fna	0.117529	4	7.24e-06	29	42	16	445795	1652884	15167	Mouse-Gut	7	5.54577e-11	56.5714	82	23	0	0	NA	11
./Human-Gut/pub/databases/metagenomics/mgnify_genomes/human-gut/v2.0/species_catalogue/MGYG0000037/MGYG000003753/genome/MGYG000003753.fna	0.118019	4	7.36e-06	12	13	11	130071	209561	22610	Human-Gut	2	0.00643976	62	63	61	0	0	NA	6
./Human-Gut/pub/databases/metagenomics/mgnify_genomes/human-gut/v2.0/species_catalogue/MGYG0000005/MGYG000000563/genome/MGYG000000563.fna	0.119117	4	7.63e-06	6968.5	27788	12	434483	1131912	66377	Human-Gut	2	0.00655545	77.5	136	19	0	0	NA	6
./Human-Gut/pub/databases/metagenomics/mgnify_genomes/human-gut/v2.0/species_catalogue/MGYG0000036/MGYG000003651/genome/MGYG000003651.fna	0.119468	4	7.72e-06	15.5	31	1	468529	674299	306137	Human-Gut	5	1.83615e-07	96.2	135	33	0	0	NA	9
./Mouse-Gut/ftp.ebi.ac.uk/pub/databases/metagenomics/mgnify_genomes/mouse-gut/v1.0/species_catalogue/MGYG0003300/MGYG000330031/genome/MGYG000330031.fna	0.119968	4	7.84e-06	38.5	43	36	122379	307954	26242	Mouse-Gut	2	0.00664567	28	30	26	0	0	NA	6
./Mouse-Gut/ftp.ebi.ac.uk/pub/databases/metagenomics/mgnify_genomes/mouse-gut/v1.0/species_catalogue/MGYG0003266/MGYG000326680/genome/MGYG000326680.fna	0.12002	4	7.86e-06	37	38	36	426316	863987	59780	Mouse-Gut	6	3.74599e-09	23.5	40	5	0	0	NA	10
./Pig-Gut/ftp.ebi.ac.uk/pub/databases/metagenomics/mgnify_genomes/pig-gut/v1.0/species_catalogue/MGYG0003011/MGYG000301159/genome/MGYG000301159.fna	0.123302	4	8.73e-06	2526.75	9799	3	330881	591508	45569	Pig-Gut	3	0.000284922	97.3333	185	11	0	0	NA	7
./Human-Gut/pub/databases/metagenomics/mgnify_genomes/human-gut/v2.0/species_catalogue/MGYG0000037/MGYG000003728/genome/MGYG000003728.fna	0.124457	4	9.05e-06	14.5	22	12	229842	396345	68917	Human-Gut	2	0.00713125	34.5	65	4	0	0	NA	6
./Non-Model-Fish-Gut/ftp.ebi.ac.uk/pub/databases/metagenomics/mgnify_genomes/non-model-fish-gut/v2.0/species_catalogue/MGYG0002996/MGYG000299675/genome/MGYG000299675.fna	0.124674	4	9.11e-06	39.75	41	38	395124	529156	234104	Non-Model-Fish-Gut	7	8.33053e-11	121.429	260	9	0	0	NA	11
./Human-Gut/pub/databases/metagenomics/mgnify_genomes/human-gut/v2.0/species_catalogue/MGYG0000037/MGYG000003747/genome/MGYG000003747.fna	0.125167	4	9.25e-06	6660.5	26603	12	411319	1119906	55778	Human-Gut	1	0.11765	17	17	17	0	0	NA	5
./Human-Gut/pub/databases/metagenomics/mgnify_genomes/human-gut/v2.0/species_catalogue/MGYG0000021/MGYG000002117/genome/MGYG000002117.fna	0.125388	4	9.32e-06	16977.5	60570	11	478489	1048483	56718	Human-Gut	3	0.000299157	28	58	4	0	0	NA	7
./Human-Gut/pub/databases/metagenomics/mgnify_genomes/human-gut/v2.0/species_catalogue/MGYG0000029/MGYG000002951/genome/MGYG000002951.fna	0.0388086	3	9.46e-06	46.3333	61	17	135581	323091	25105	Human-Gut	3	9.46245e-06	16.6667	22	12	0	0	NA	6
./Human-Gut/pub/databases/metagenomics/mgnify_genomes/human-gut/v2.0/species_catalogue/MGYG0000032/MGYG000003295/genome/MGYG000003295.fna	0.126592	4	9.67e-06	52	71	37	494706	1213510	27810	Human-Gut	0	1	0	0	NA	0	0	NA	4
./Mouse-Gut/ftp.ebi.ac.uk/pub/databases/metagenomics/mgnify_genomes/mouse-gut/v1.0/species_catalogue/MGYG0003297/MGYG000329700/genome/MGYG000329700.fna	0.126817	4	9.74e-06	2039.5	8081	8	178074	357196	16227	Mouse-Gut	6	5.18288e-09	80.5	156	8	0	0	NA	10
./Non-Model-Fish-Gut/ftp.ebi.ac.uk/pub/databases/metagenomics/mgnify_genomes/non-model-fish-gut/v2.0/species_catalogue/MGYG0002995/MGYG000299547/genome/MGYG000299547.fna	0.12887	4	1.04e-05	24.25	37	16	189619	376021	35069	Non-Model-Fish-Gut	3	0.000323942	25.6667	35	17	0	0	NA	7
./Cow-Rumen/ftp.ebi.ac.uk/pub/databases/metagenomics/mgnify_genomes/cow-rumen/v1.0/species_catalogue/MGYG0002917/MGYG000291720/genome/MGYG000291720.fna	0.131114	4	1.11e-05	8977.25	13949	3383	137501	249223	95926	Cow-Rumen	0	1	0	0	NA	0	0	NA	4
./Mouse-Gut/ftp.ebi.ac.uk/pub/databases/metagenomics/mgnify_genomes/mouse-gut/v1.0/species_catalogue/MGYG0003312/MGYG000331230/genome/MGYG000331230.fna	0.0412472	3	1.13e-05	24.6667	38	15	45188.3	103652	5456	Mouse-Gut	2	0.000827634	70	97	43	0	0	NA	5
./Mouse-Gut/ftp.ebi.ac.uk/pub/databases/metagenomics/mgnify_genomes/mouse-gut/v1.0/species_catalogue/MGYG0003307/MGYG000330714/genome/MGYG000330714.fna	0.132686	4	1.16e-05	28.75	49	3	158400	331896	69396	Mouse-Gut	3	0.000352577	29.3333	44	11	0	0	NA	7
./Human-Gut/pub/databases/metagenomics/mgnify_genomes/human-gut/v2.0/species_catalogue/MGYG0000033/MGYG000003339/genome/MGYG000003339.fna	0.133761	4	1.2e-05	13.5	28	6	184274	547542	8	Human-Gut	6	7.09448e-09	48.3333	108	14	0	0	NA	10
./Mouse-Gut/ftp.ebi.ac.uk/pub/databases/metagenomics/mgnify_genomes/mouse-gut/v1.0/species_catalogue/MGYG0004016/MGYG000401669/genome/MGYG000401669.fna	0.134694	4	1.23e-05	3441	13672	15	475416	1087164	62604	Mouse-Gut	5	3.30287e-07	124.4	180	53	0	0	NA	9
./Mouse-Gut/ftp.ebi.ac.uk/pub/databases/metagenomics/mgnify_genomes/mouse-gut/v1.0/species_catalogue/MGYG0003304/MGYG000330443/genome/MGYG000330443.fna	0.134719	4	1.23e-05	32.75	42	12	528752	1533746	34272	Mouse-Gut	4	1.23254e-05	135.5	321	40	0	0	NA	8
./Mouse-Gut/ftp.ebi.ac.uk/pub/databases/metagenomics/mgnify_genomes/mouse-gut/v1.0/species_catalogue/MGYG0003282/MGYG000328228/genome/MGYG000328228.fna	0.134571	4	1.23e-05	35.25	38	33	196480	243872	153865	Mouse-Gut	1	0.12591	71	71	71	0	0	NA	5
./Human-Gut/pub/databases/metagenomics/mgnify_genomes/human-gut/v2.0/species_catalogue/MGYG0000026/MGYG000002665/genome/MGYG000002665.fna	0.135141	4	1.25e-05	13.75	19	9	197855	290217	62716	Human-Gut	2	0.00834902	120	154	86	0	0	NA	6
./Human-Gut/pub/databases/metagenomics/mgnify_genomes/human-gut/v2.0/species_catalogue/MGYG0000041/MGYG000004171/genome/MGYG000004171.fna	0.136204	4	1.29e-05	6401.75	13582	2	112410	194171	1581	Human-Gut	0	1	0	0	NA	0	0	NA	4
./Human-Gut/pub/databases/metagenomics/mgnify_genomes/human-gut/v2.0/species_catalogue/MGYG0000046/MGYG000004669/genome/MGYG000004669.fna	0.0461249	3	1.58e-05	9.33333	22	3	217734	300406	127816	Human-Gut	2	0.0010316	60.5	86	35	0	0	NA	5
./Human-Gut/pub/databases/metagenomics/mgnify_genomes/human-gut/v2.0/species_catalogue/MGYG0000045/MGYG000004586/genome/MGYG000004586.fna	0.144312	4	1.61e-05	3	4	2	279228	334702	200981	Human-Gut	1	0.134382	2	2	2	0	0	NA	5
./Human-Gut/pub/databases/metagenomics/mgnify_genomes/human-gut/v2.0/species_catalogue/MGYG0000036/MGYG000003610/genome/MGYG000003610.fna	0.146626	4	1.71e-05	15	25	9	466120	1059738	133561	Human-Gut	0	1	0	0	NA	0	0	NA	4
./Mouse-Gut/ftp.ebi.ac.uk/pub/databases/metagenomics/mgnify_genomes/mouse-gut/v1.0/species_catalogue/MGYG0003273/MGYG000327369/genome/MGYG000327369.fna	0.147899	4	1.77e-05	34.5	36	33	294542	348053	253283	Mouse-Gut	6	1.2808e-08	53.6667	114	2	0	0	NA	10
./Human-Gut/pub/databases/metagenomics/mgnify_genomes/human-gut/v2.0/species_catalogue/MGYG0000034/MGYG000003456/genome/MGYG000003456.fna	0.14839	4	1.79e-05	13.5	23	5	594811	810127	278219	Human-Gut	5	5.29952e-07	105.8	135	75	0	0	NA	9
./Human-Gut/pub/databases/metagenomics/mgnify_genomes/human-gut/v2.0/species_catalogue/MGYG0000012/MGYG000001219/genome/MGYG000001219.fna	0.151189	4	1.93e-05	4071	12802	1	585314	986713	38878	Human-Gut	1	0.140315	93	93	93	0	0	NA	5
./Pig-Gut/ftp.ebi.ac.uk/pub/databases/metagenomics/mgnify_genomes/pig-gut/v1.0/species_catalogue/MGYG0003019/MGYG000301985/genome/MGYG000301985.fna	0.151289	4	1.93e-05	15	33	4	312489	414042	188600	Pig-Gut	0	1	0	0	NA	0	0	NA	4
./Human-Gut/pub/databases/metagenomics/mgnify_genomes/human-gut/v2.0/species_catalogue/MGYG0000026/MGYG000002628/genome/MGYG000002628.fna	0.155385	4	2.15e-05	2603.5	10373	10	187473	352630	58420	Human-Gut	1	0.143915	17	17	17	0	0	NA	5
./Mouse-Gut/ftp.ebi.ac.uk/pub/databases/metagenomics/mgnify_genomes/mouse-gut/v1.0/species_catalogue/MGYG0003306/MGYG000330643/genome/MGYG000330643.fna	0.156224	4	2.19e-05	32.5	41	21	312330	877477	57894	Mouse-Gut	3	0.000565467	128	238	21	0	0	NA	7
./Mouse-Gut/ftp.ebi.ac.uk/pub/databases/metagenomics/mgnify_genomes/mouse-gut/v1.0/species_catalogue/MGYG0003544/MGYG000354465/genome/MGYG000354465.fna	0.156602	4	2.21e-05	2254.25	8928	24	11771.2	33038	7	Mouse-Gut	5	6.89029e-07	80.8	313	2	68.8	196	7	9
./Marine/ftp.ebi.ac.uk/pub/databases/metagenomics/mgnify_genomes/marine/v1.0/species_catalogue/MGYG0002973/MGYG000297365/genome/MGYG000297365.fna	0.15834	4	2.31e-05	14493.8	57621	83	540477	1284623	73169	Marine	4	2.30826e-05	21	43	4	0	0	NA	8
./Mouse-Gut/ftp.ebi.ac.uk/pub/databases/metagenomics/mgnify_genomes/mouse-gut/v1.0/species_catalogue/MGYG0003313/MGYG000331316/genome/MGYG000331316.fna	0.0534987	3	2.45e-05	8.33333	15	3	287028	399475	187659	Mouse-Gut	1	0.0520928	98	98	98	0	0	NA	4
./Cow-Rumen/ftp.ebi.ac.uk/pub/databases/metagenomics/mgnify_genomes/cow-rumen/v1.0/species_catalogue/MGYG0002906/MGYG000290614/genome/MGYG000290614.fna	0.161794	4	2.51e-05	16465.2	33840	2716	91674	270146	9285	Cow-Rumen	4	2.50946e-05	36.5	87	2	122.333	207	20	8
./Non-Model-Fish-Gut/ftp.ebi.ac.uk/pub/databases/metagenomics/mgnify_genomes/non-model-fish-gut/v2.0/species_catalogue/MGYG0002995/MGYG000299522/genome/MGYG000299522.fna	0.162586	4	2.56e-05	29.25	37	7	73408	220859	3824	Non-Model-Fish-Gut	1	0.150057	10	10	10	0	0	NA	5
./Mouse-Gut/ftp.ebi.ac.uk/pub/databases/metagenomics/mgnify_genomes/mouse-gut/v1.0/species_catalogue/MGYG0003253/MGYG000325348/genome/MGYG000325348.fna	0.165526	4	2.74e-05	3861.25	10276	1228	660264	1503874	118041	Mouse-Gut	0	1	0	0	NA	0	0	NA	4
./Marine/ftp.ebi.ac.uk/pub/databases/metagenomics/mgnify_genomes/marine/v1.0/species_catalogue/MGYG0002968/MGYG000296847/genome/MGYG000296847.fna	0.166039	4	2.77e-05	509.75	1724	68	591377	1654481	50698	Marine	8	1.23631e-11	21	38	8	0	0	NA	12
./Pig-Gut/ftp.ebi.ac.uk/pub/databases/metagenomics/mgnify_genomes/pig-gut/v1.0/species_catalogue/MGYG0003012/MGYG000301255/genome/MGYG000301255.fna	0.166369	4	2.8e-05	23.75	34	13	454436	1287455	90031	Pig-Gut	5	9.2488e-07	137.6	211	63	0	0	NA	9
./Human-Gut/pub/databases/metagenomics/mgnify_genomes/human-gut/v2.0/species_catalogue/MGYG0000047/MGYG000004730/genome/MGYG000004730.fna	0.167015	4	2.84e-05	13	25	4	147477	264124	28813	Human-Gut	2	0.0124871	215.5	316	115	0	0	NA	6
./Human-Gut/pub/databases/metagenomics/mgnify_genomes/human-gut/v2.0/species_catalogue/MGYG0000045/MGYG000004582/genome/MGYG000004582.fna	0.167845	4	2.89e-05	22702.8	36360	6729	621525	1642228	54461	Human-Gut	0	1	0	0	NA	0	0	NA	4
./Human-Gut/pub/databases/metagenomics/mgnify_genomes/human-gut/v2.0/species_catalogue/MGYG0000032/MGYG000003214/genome/MGYG000003214.fna	0.342104	5	2.94e-05	68.8	316	1	1057703	2923184	69021	Human-Gut	3	0.00517446	268	445	176	0	0	NA	8
./Mouse-Gut/ftp.ebi.ac.uk/pub/databases/metagenomics/mgnify_genomes/mouse-gut/v1.0/species_catalogue/MGYG0003271/MGYG000327184/genome/MGYG000327184.fna	0.168749	4	2.95e-05	5470.5	21047	33	662140	1173964	62512	Mouse-Gut	1	0.155279	19	19	19	0	0	NA	5
./Marine/ftp.ebi.ac.uk/pub/databases/metagenomics/mgnify_genomes/marine/v1.0/species_catalogue/MGYG0002960/MGYG000296059/genome/MGYG000296059.fna	0.169968	4	3.04e-05	145.5	190	99	617768	1287382	156	Marine	7	7.00851e-10	29.3333	63	9	0	0	NA	11
./Mouse-Gut/ftp.ebi.ac.uk/pub/databases/metagenomics/mgnify_genomes/mouse-gut/v1.0/species_catalogue/MGYG0003272/MGYG000327294/genome/MGYG000327294.fna	0.170332	4	3.06e-05	35	36	34	330891	958444	33174	Mouse-Gut	4	3.06171e-05	33.5	65	4	0	0	NA	8
./Marine/ftp.ebi.ac.uk/pub/databases/metagenomics/mgnify_genomes/marine/v1.0/species_catalogue/MGYG0002968/MGYG000296888/genome/MGYG000296888.fna	0.172198	4	3.19e-05	13	36	1	633184	1923566	63216	Marine	2	0.0132291	208.5	304	113	0	0	NA	6
./Mouse-Gut/ftp.ebi.ac.uk/pub/databases/metagenomics/mgnify_genomes/mouse-gut/v1.0/species_catalogue/MGYG0003282/MGYG000328230/genome/MGYG000328230.fna	0.173349	4	3.28e-05	30.25	43	9	469797	1258130	37484	Mouse-Gut	11	1.11022e-16	113.545	201	2	0	0	NA	15
./Human-Gut/pub/databases/metagenomics/mgnify_genomes/human-gut/v2.0/species_catalogue/MGYG0000032/MGYG000003236/genome/MGYG000003236.fna	0.173945	4	3.32e-05	10.75	18	5	644450	1602693	108832	Human-Gut	4	3.3203e-05	57.75	77	7	0	0	NA	8
./Human-Gut/pub/databases/metagenomics/mgnify_genomes/human-gut/v2.0/species_catalogue/MGYG0000021/MGYG000002123/genome/MGYG000002123.fna	0.176038	4	3.48e-05	33.75	44	19	671156	1897739	171500	Human-Gut	6	3.55538e-08	181.5	272	18	0	0	NA	10
./Human-Gut/pub/databases/metagenomics/mgnify_genomes/human-gut/v2.0/species_catalogue/MGYG0000032/MGYG000003299/genome/MGYG000003299.fna	0.0613461	3	3.68e-05	35.6667	57	3	123895	289359	11152	Human-Gut	1	0.0595023	179	179	179	0	0	NA	4
./Human-Gut/pub/databases/metagenomics/mgnify_genomes/human-gut/v2.0/species_catalogue/MGYG0000036/MGYG000003615/genome/MGYG000003615.fna	0.183593	4	4.09e-05	11	21	3	703244	1194455	65327	Human-Gut	9	5.53668e-13	98.7778	153	33	0	0	NA	13
./Mouse-Gut/ftp.ebi.ac.uk/pub/databases/metagenomics/mgnify_genomes/mouse-gut/v1.0/species_catalogue/MGYG0003225/MGYG000322593/genome/MGYG000322593.fna	0.183764	4	4.1e-05	32650.2	90615	26	505862	1234189	3	Mouse-Gut	2	0.0149519	16	17	15	40	40	40	6
./Human-Gut/pub/databases/metagenomics/mgnify_genomes/human-gut/v2.0/species_catalogue/MGYG0000035/MGYG000003550/genome/MGYG000003550.fna	0.184972	4	4.21e-05	12.75	18	7	774075	1192900	108894	Human-Gut	10	1.08802e-14	49.8	100	3	0	0	NA	14
./Mouse-Gut/ftp.ebi.ac.uk/pub/databases/metagenomics/mgnify_genomes/mouse-gut/v1.0/species_catalogue/MGYG0003313/MGYG000331382/genome/MGYG000331382.fna	0.185259	4	4.23e-05	19.25	51	4	545968	1581603	26185	Mouse-Gut	4	4.23389e-05	85.5	112	61	0	0	NA	8
./Mouse-Gut/ftp.ebi.ac.uk/pub/databases/metagenomics/mgnify_genomes/mouse-gut/v1.0/species_catalogue/MGYG0003222/MGYG000322265/genome/MGYG000322265.fna	0.185664	4	4.27e-05	38	39	37	328781	1044413	43083	Mouse-Gut	11	2.22045e-16	64.9091	143	11	149.5	232	67	15
./Mouse-Gut/ftp.ebi.ac.uk/pub/databases/metagenomics/mgnify_genomes/mouse-gut/v1.0/species_catalogue/MGYG0003226/MGYG000322685/genome/MGYG000322685.fna	0.186357	4	4.33e-05	2117.75	8398	12	134548	278055	23	Mouse-Gut	3	0.000938583	52.3333	75	21	122	181	37	7
./Marine/ftp.ebi.ac.uk/pub/databases/metagenomics/mgnify_genomes/marine/v1.0/species_catalogue/MGYG0002969/MGYG000296968/genome/MGYG000296968.fna	0.186395	4	4.33e-05	90	132	8	352645	860328	146851	Marine	1	0.170055	21	21	21	0	0	NA	5
./Human-Gut/pub/databases/metagenomics/mgnify_genomes/human-gut/v2.0/species_catalogue/MGYG0000005/MGYG000000514/genome/MGYG000000514.fna	0.187497	4	4.43e-05	8.75	13	5	579540	843102	67859	Human-Gut	8	3.20726e-11	58.75	129	27	0	0	NA	12
./Marine/ftp.ebi.ac.uk/pub/databases/metagenomics/mgnify_genomes/marine/v1.0/species_catalogue/MGYG0002964/MGYG000296433/genome/MGYG000296433.fna	0.187894	4	4.47e-05	11.75	30	2	491316	1508488	9381	Marine	3	0.000960895	190	236	126	0	0	NA	7
./Human-Gut/pub/databases/metagenomics/mgnify_genomes/human-gut/v2.0/species_catalogue/MGYG0000047/MGYG000004741/genome/MGYG000004741.fna	0.0701395	3	5.46e-05	10.3333	23	3	210957	346370	101903	Human-Gut	2	0.00234773	117	181	53	0	0	NA	5
./Human-Gut/pub/databases/metagenomics/mgnify_genomes/human-gut/v2.0/species_catalogue/MGYG0000016/MGYG000001647/genome/MGYG000001647.fna	0.070557	3	5.55e-05	6	11	3	84315.7	130294	6770	Human-Gut	4	9.76032e-07	36.5	45	27	0	0	NA	7
./Mouse-Gut/ftp.ebi.ac.uk/pub/databases/metagenomics/mgnify_genomes/mouse-gut/v1.0/species_catalogue/MGYG0003256/MGYG000325673/genome/MGYG000325673.fna	0.199826	4	5.67e-05	12046.8	26914	165	567072	1150642	229352	Mouse-Gut	1	0.181126	176	176	176	0	0	NA	5
./Human-Gut/pub/databases/metagenomics/mgnify_genomes/human-gut/v2.0/species_catalogue/MGYG0000012/MGYG000001251/genome/MGYG000001251.fna	0.200342	4	5.72e-05	8199.75	16245	3135	738331	1048564	348583	Human-Gut	1	0.18155	36	36	36	0	0	NA	5
./Human-Gut/pub/databases/metagenomics/mgnify_genomes/human-gut/v2.0/species_catalogue/MGYG0000029/MGYG000002903/genome/MGYG000002903.fna	0.071759	3	5.84e-05	33.6667	34	33	319545	730465	37476	Human-Gut	2	0.00245476	53.5	88	19	0	0	NA	5
./Marine/ftp.ebi.ac.uk/pub/databases/metagenomics/mgnify_genomes/marine/v1.0/species_catalogue/MGYG0002961/MGYG000296159/genome/MGYG000296159.fna	0.201926	4	5.9e-05	1325.5	5173	15	459194	768796	42814	Marine	4	5.89715e-05	152.5	323	7	0	0	NA	8
./Human-Gut/pub/databases/metagenomics/mgnify_genomes/human-gut/v2.0/species_catalogue/MGYG0000026/MGYG000002654/genome/MGYG000002654.fna	0.0725909	3	6.04e-05	155.333	455	5	70847.7	156979	455	Human-Gut	1	0.0700188	110	110	110	0	0	NA	4
./Pig-Gut/ftp.ebi.ac.uk/pub/databases/metagenomics/mgnify_genomes/pig-gut/v1.0/species_catalogue/MGYG0003021/MGYG000302100/genome/MGYG000302100.fna	0.0729604	3	6.13e-05	25.6667	39	1	303552	498649	138442	Pig-Gut	1	0.0703623	20	20	20	0	0	NA	4
./Non-Model-Fish-Gut/ftp.ebi.ac.uk/pub/databases/metagenomics/mgnify_genomes/non-model-fish-gut/v2.0/species_catalogue/MGYG0002995/MGYG000299550/genome/MGYG000299550.fna	0.209594	4	6.8e-05	42.5	78	14	277467	615427	21161	Non-Model-Fish-Gut	8	7.66821e-11	48.5	96	20	0	0	NA	12
./Non-Model-Fish-Gut/ftp.ebi.ac.uk/pub/databases/metagenomics/mgnify_genomes/non-model-fish-gut/v2.0/species_catalogue/MGYG0002996/MGYG000299682/genome/MGYG000299682.fna	0.210449	4	6.91e-05	36.25	38	34	408618	776834	172807	Non-Model-Fish-Gut	9	1.84663e-12	116.667	209	7	0	0	NA	13
./Pig-Gut/ftp.ebi.ac.uk/pub/databases/metagenomics/mgnify_genomes/pig-gut/v1.0/species_catalogue/MGYG0003017/MGYG000301705/genome/MGYG000301705.fna	0.077521	3	7.33e-05	2417.67	7194	26	399068	1059105	18127	Pig-Gut	3	7.32665e-05	50	90	6	0	0	NA	6
./Human-Gut/pub/databases/metagenomics/mgnify_genomes/human-gut/v2.0/species_catalogue/MGYG0000034/MGYG000003440/genome/MGYG000003440.fna	0.215985	4	7.63e-05	15	22	9	639099	1257568	247550	Human-Gut	4	7.63342e-05	60.75	130	2	0	0	NA	8
./Mouse-Gut/ftp.ebi.ac.uk/pub/databases/metagenomics/mgnify_genomes/mouse-gut/v1.0/species_catalogue/MGYG0003220/MGYG000322008/genome/MGYG000322008.fna	0.0821538	3	8.69e-05	4585	13743	5	144787	276981	6	Mouse-Gut	3	8.69016e-05	43.3333	85	16	43.5	45	42	6
./Marine/ftp.ebi.ac.uk/pub/databases/metagenomics/mgnify_genomes/marine/v1.0/species_catalogue/MGYG0002967/MGYG000296766/genome/MGYG000296766.fna	0.0826617	3	8.85e-05	20	39	8	239166	412110	54578	Marine	1	0.0793375	10	10	10	0	0	NA	4
./Non-Model-Fish-Gut/ftp.ebi.ac.uk/pub/databases/metagenomics/mgnify_genomes/non-model-fish-gut/v2.0/species_catalogue/MGYG0002996/MGYG000299677/genome/MGYG000299677.fna	0.230205	4	9.74e-05	36.25	37	35	549333	1723182	10509	Non-Model-Fish-Gut	5	4.44949e-06	106.8	138	43	0	0	NA	9
./Mouse-Gut/ftp.ebi.ac.uk/pub/databases/metagenomics/mgnify_genomes/mouse-gut/v1.0/species_catalogue/MGYG0003272/MGYG000327260/genome/MGYG000327260.fna	0.0868623	3	0.000102356	36	36	36	110808	190967	50672	Mouse-Gut	5	3.83329e-08	18.4	33	7	0	0	NA	8
./Human-Gut/pub/databases/metagenomics/mgnify_genomes/human-gut/v2.0/species_catalogue/MGYG0000032/MGYG000003238/genome/MGYG000003238.fna	0.0873638	3	0.0001041	12.3333	21	2	246292	448183	132869	Human-Gut	2	0.00360107	71	106	36	0	0	NA	5
./Human-Gut/pub/databases/metagenomics/mgnify_genomes/human-gut/v2.0/species_catalogue/MGYG0000016/MGYG000001661/genome/MGYG000001661.fna	0.235507	4	0.000106244	15	22	6	95739.8	250210	20281	Human-Gut	3	0.00182644	38.3333	49	21	0	0	NA	7
./Pig-Gut/ftp.ebi.ac.uk/pub/databases/metagenomics/mgnify_genomes/pig-gut/v1.0/species_catalogue/MGYG0003021/MGYG000302182/genome/MGYG000302182.fna	0.0888383	3	0.00010934	832	2456	11	39940.7	61865	11697	Pig-Gut	4	2.41752e-06	138.25	199	7	0	0	NA	7
./Marine/ftp.ebi.ac.uk/pub/databases/metagenomics/mgnify_genomes/marine/v1.0/species_catalogue/MGYG0002962/MGYG000296245/genome/MGYG000296245.fna	0.237778	4	0.000110204	17.5	27	8	935647	1823450	256234	Marine	4	0.000110204	190.5	423	81	0	0	NA	8
./Mouse-Gut/ftp.ebi.ac.uk/pub/databases/metagenomics/mgnify_genomes/mouse-gut/v1.0/species_catalogue/MGYG0003532/MGYG000353267/genome/MGYG000353267.fna	0.240699	4	0.000115451	31869.8	43735	20680	60668	118599	20680	Mouse-Gut	0	1	0	0	NA	0	0	NA	4
./Human-Gut/pub/databases/metagenomics/mgnify_genomes/human-gut/v2.0/species_catalogue/MGYG0000037/MGYG000003738/genome/MGYG000003738.fna	0.0912471	3	0.000118264	835.667	2476	9	168089	343368	21138	Human-Gut	0	1	0	0	NA	0	0	NA	3
./Human-Gut/pub/databases/metagenomics/mgnify_genomes/human-gut/v2.0/species_catalogue/MGYG0000037/MGYG000003756/genome/MGYG000003756.fna	0.0918723	3	0.000120656	6.33333	12	2	265371	523079	6262	Human-Gut	2	0.00397047	178	232	124	0	0	NA	5
./Cow-Rumen/ftp.ebi.ac.uk/pub/databases/metagenomics/mgnify_genomes/cow-rumen/v1.0/species_catalogue/MGYG0002948/MGYG000294839/genome/MGYG000294839.fna	0.092016	3	0.00012121	2586	3866	747	252183	435743	38277	Cow-Rumen	1	0.0879095	10	10	10	0	0	NA	4
./Human-Gut/pub/databases/metagenomics/mgnify_genomes/human-gut/v2.0/species_catalogue/MGYG0000029/MGYG000002929/genome/MGYG000002929.fna	0.0923303	3	0.000122427	36.3333	54	3	443784	657734	43336	Human-Gut	5	5.17799e-08	174.8	285	37	0	0	NA	8
./Marine/ftp.ebi.ac.uk/pub/databases/metagenomics/mgnify_genomes/marine/v1.0/species_catalogue/MGYG0002971/MGYG000297174/genome/MGYG000297174.fna	0.0943301	3	0.000130361	24	32	17	284127	581904	97554	Marine	4	3.05962e-06	122.25	171	28	0	0	NA	7
./Mouse-Gut/ftp.ebi.ac.uk/pub/databases/metagenomics/mgnify_genomes/mouse-gut/v1.0/species_catalogue/MGYG0003272/MGYG000327237/genome/MGYG000327237.fna	0.249111	4	0.000131576	3535.75	14076	2	409184	1131164	110844	Mouse-Gut	3	0.00213994	43.3333	81	18	0	0	NA	7
./Mouse-Gut/ftp.ebi.ac.uk/pub/databases/metagenomics/mgnify_genomes/mouse-gut/v1.0/species_catalogue/MGYG0003308/MGYG000330832/genome/MGYG000330832.fna	0.0962658	3	0.000138352	32.3333	39	20	184630	304317	102923	Mouse-Gut	4	3.31348e-06	37.75	76	2	0	0	NA	7
./Human-Gut/pub/databases/metagenomics/mgnify_genomes/human-gut/v2.0/species_catalogue/MGYG0000011/MGYG000001198/genome/MGYG000001198.fna	0.0967216	3	0.000140279	1933.67	5798	1	196198	320918	124244	Human-Gut	1	0.0921913	169	169	169	0	0	NA	4
./Cow-Rumen/ftp.ebi.ac.uk/pub/databases/metagenomics/mgnify_genomes/cow-rumen/v1.0/species_catalogue/MGYG0002935/MGYG000293589/genome/MGYG000293589.fna	0.0978519	3	0.000145132	3911.67	5395	1323	299180	510176	98946	Cow-Rumen	0	1	0	0	NA	0	0	NA	3
./Cow-Rumen/ftp.ebi.ac.uk/pub/databases/metagenomics/mgnify_genomes/cow-rumen/v1.0/species_catalogue/MGYG0002902/MGYG000290282/genome/MGYG000290282.fna	0.09794	3	0.000145514	2922	7655	235	444109	886582	16596	Cow-Rumen	0	1	0	0	NA	0	0	NA	3
./Human-Gut/pub/databases/metagenomics/mgnify_genomes/human-gut/v2.0/species_catalogue/MGYG0000020/MGYG000002089/genome/MGYG000002089.fna	0.098074	3	0.000146098	37.6667	38	37	508349	1006112	87286	Human-Gut	3	0.000146098	160	309	43	0	0	NA	6
./Human-Gut/pub/databases/metagenomics/mgnify_genomes/human-gut/v2.0/species_catalogue/MGYG0000009/MGYG000000934/genome/MGYG000000934.fna	0.0981469	3	0.000146416	226.333	610	34	474845	1235563	65743	Human-Gut	2	0.00451256	162	284	40	0	0	NA	5
./Mouse-Gut/ftp.ebi.ac.uk/pub/databases/metagenomics/mgnify_genomes/mouse-gut/v1.0/species_catalogue/MGYG0003268/MGYG000326882/genome/MGYG000326882.fna	0.0992431	3	0.000151253	37.3333	38	37	24282.7	39206	12737	Mouse-Gut	4	3.73394e-06	25.25	48	11	0	0	NA	7
./Human-Oral/ftp.ebi.ac.uk/pub/databases/metagenomics/mgnify_genomes/human-oral/v1.0/species_catalogue/MGYG0002986/MGYG000298675/genome/MGYG000298675.fna	0.0992942	3	0.000151481	36.3333	43	23	366914	608859	206026	Human-Oral	2	0.00461518	155	226	84	0	0	NA	5
./Non-Model-Fish-Gut/ftp.ebi.ac.uk/pub/databases/metagenomics/mgnify_genomes/non-model-fish-gut/v2.0/species_catalogue/MGYG0002995/MGYG000299504/genome/MGYG000299504.fna	0.0998379	3	0.000153921	24.6667	36	3	348452	467275	131152	Non-Model-Fish-Gut	6	1.26272e-09	42	60	24	0	0	NA	9
./Human-Vaginal/ftp.ebi.ac.uk/pub/databases/metagenomics/mgnify_genomes/human-vaginal/v1.0/species_catalogue/MGYG0003040/MGYG000304005/genome/MGYG000304005.fna	0.102491	3	0.00016619	1789.67	5291	37	420334	588886	93492	Human-Vaginal	2	0.00490672	217	290	144	0	0	NA	5
./Mouse-Gut/ftp.ebi.ac.uk/pub/databases/metagenomics/mgnify_genomes/mouse-gut/v1.0/species_catalogue/MGYG0003305/MGYG000330584/genome/MGYG000330584.fna	0.102491	3	0.00016619	6.66667	12	2	63226.3	114226	13269	Mouse-Gut	1	0.0974134	45	45	45	0	0	NA	4
./Human-Gut/pub/databases/metagenomics/mgnify_genomes/human-gut/v2.0/species_catalogue/MGYG0000035/MGYG000003593/genome/MGYG000003593.fna	0.266005	4	0.00016879	12.5	24	1	965907	2112322	30020	Human-Gut	4	0.00016879	142.75	207	60	0	0	NA	8
./Mouse-Gut/ftp.ebi.ac.uk/pub/databases/metagenomics/mgnify_genomes/mouse-gut/v1.0/species_catalogue/MGYG0003872/MGYG000387283/genome/MGYG000387283.fna	0.10348	3	0.000170924	2928.33	4412	1386	8711.67	12650	3283	Mouse-Gut	2	0.00499866	147	249	45	130	208	52	5
./Human-Oral/ftp.ebi.ac.uk/pub/databases/metagenomics/mgnify_genomes/human-oral/v1.0/species_catalogue/MGYG0002985/MGYG000298570/genome/MGYG000298570.fna	0.103724	3	0.000172105	1220.33	3588	35	280060	591170	65154	Human-Oral	5	9.17757e-08	69.2	110	12	0	0	NA	8
./Mouse-Gut/ftp.ebi.ac.uk/pub/databases/metagenomics/mgnify_genomes/mouse-gut/v1.0/species_catalogue/MGYG0003225/MGYG000322586/genome/MGYG000322586.fna	0.104297	3	0.000174895	765.333	1329	292	24	30	15	Mouse-Gut	6	1.63494e-09	5.6	9	2	46	52	40	9
./Pig-Gut/ftp.ebi.ac.uk/pub/databases/metagenomics/mgnify_genomes/pig-gut/v1.0/species_catalogue/MGYG0003014/MGYG000301488/genome/MGYG000301488.fna	0.104564	3	0.000176209	22.6667	40	5	250813	447038	128313	Pig-Gut	4	4.58199e-06	118.75	148	94	0	0	NA	7
./Human-Gut/pub/databases/metagenomics/mgnify_genomes/human-gut/v2.0/species_catalogue/MGYG0000035/MGYG000003559/genome/MGYG000003559.fna	0.104587	3	0.000176323	8.33333	15	1	578698	898315	19212	Human-Gut	6	1.66206e-09	73	124	36	0	0	NA	9
./Human-Gut/pub/databases/metagenomics/mgnify_genomes/human-gut/v2.0/species_catalogue/MGYG0000032/MGYG000003267/genome/MGYG000003267.fna	0.105024	3	0.000178484	21.6667	37	14	482479	1345869	5119	Human-Gut	2	0.0051437	81	156	6	0	0	NA	5
./Human-Gut/pub/databases/metagenomics/mgnify_genomes/human-gut/v2.0/species_catalogue/MGYG0000037/MGYG000003785/genome/MGYG000003785.fna	0.105042	3	0.000178574	11.6667	16	6	326056	467624	113765	Human-Gut	0	1	0	0	NA	0	0	NA	3
./Honeybee-Gut/ftp.ebi.ac.uk/pub/databases/metagenomics/mgnify_genomes/honeybee-gut/v1.0/species_catalogue/MGYG0003213/MGYG000321333/genome/MGYG000321333.fna	0.272231	4	0.000184243	1359	5377	3	586902	865813	140978	Honeybee-Gut	0	1	0	0	NA	0	0	NA	4
./Mouse-Gut/ftp.ebi.ac.uk/pub/databases/metagenomics/mgnify_genomes/mouse-gut/v1.0/species_catalogue/MGYG0003227/MGYG000322788/genome/MGYG000322788.fna	0.107184	3	0.000189418	588.333	1710	17	54899	148227	30	Mouse-Gut	2	0.00534979	42.5	57	28	166	184	148	5
./Mouse-Gut/ftp.ebi.ac.uk/pub/databases/metagenomics/mgnify_genomes/mouse-gut/v1.0/species_catalogue/MGYG0003309/MGYG000330994/genome/MGYG000330994.fna	0.107843	3	0.000192841	15	22	7	455628	1093819	100822	Mouse-Gut	4	5.17086e-06	38	56	20	0	0	NA	7
./Mouse-Gut/ftp.ebi.ac.uk/pub/databases/metagenomics/mgnify_genomes/mouse-gut/v1.0/species_catalogue/MGYG0003310/MGYG000331030/genome/MGYG000331030.fna	0.108693	3	0.000197307	36.6667	39	32	188807	417760	43821	Mouse-Gut	0	1	0	0	NA	0	0	NA	3
./Human-Gut/pub/databases/metagenomics/mgnify_genomes/human-gut/v2.0/species_catalogue/MGYG0000004/MGYG000000466/genome/MGYG000000466.fna	0.109429	3	0.000201233	5.33333	6	4	436491	860837	172558	Human-Gut	5	1.19379e-07	57.2	105	9	0	0	NA	8
./Human-Gut/pub/databases/metagenomics/mgnify_genomes/human-gut/v2.0/species_catalogue/MGYG0000030/MGYG000003015/genome/MGYG000003015.fna	0.110605	3	0.000207609	840.667	2365	63	102930	244284	18510	Human-Gut	1	0.104708	34	34	34	0	0	NA	4
./Pig-Gut/ftp.ebi.ac.uk/pub/databases/metagenomics/mgnify_genomes/pig-gut/v1.0/species_catalogue/MGYG0003023/MGYG000302338/genome/MGYG000302338.fna	0.111017	3	0.000209873	28	35	17	389934	751026	22763	Pig-Gut	1	0.105076	45	45	45	0	0	NA	4
./Mouse-Gut/ftp.ebi.ac.uk/pub/databases/metagenomics/mgnify_genomes/mouse-gut/v1.0/species_catalogue/MGYG0003357/MGYG000335747/genome/MGYG000335747.fna	0.111951	3	0.000215066	206092	391470	72889	24.3333	26	22	Mouse-Gut	4	5.98523e-06	7	12	4	60.25	118	37	7
./Cow-Rumen/ftp.ebi.ac.uk/pub/databases/metagenomics/mgnify_genomes/cow-rumen/v1.0/species_catalogue/MGYG0002932/MGYG000293244/genome/MGYG000293244.fna	0.116221	3	0.000239861	32303	61420	2625	502191	1116250	123213	Cow-Rumen	1	0.109722	7	7	7	0	0	NA	4
./Mouse-Gut/ftp.ebi.ac.uk/pub/databases/metagenomics/mgnify_genomes/mouse-gut/v1.0/species_catalogue/MGYG0004105/MGYG000410549/genome/MGYG000410549.fna	0.11665	3	0.00024245	28.6667	61	7	561379	846316	348928	Mouse-Gut	5	1.63338e-07	152.6	257	32	0	0	NA	8
./Marine/ftp.ebi.ac.uk/pub/databases/metagenomics/mgnify_genomes/marine/v1.0/species_catalogue/MGYG0002973/MGYG000297384/genome/MGYG000297384.fna	0.117007	3	0.000244617	35	40	27	370938	660318	117884	Marine	4	7.11321e-06	163	216	43	0	0	NA	7
./Mouse-Gut/ftp.ebi.ac.uk/pub/databases/metagenomics/mgnify_genomes/mouse-gut/v1.0/species_catalogue/MGYG0003258/MGYG000325851/genome/MGYG000325851.fna	0.117491	3	0.000247575	316.333	896	18	279808	411994	142321	Mouse-Gut	3	0.000247575	39.6667	94	10	0	0	NA	6
./Human-Gut/pub/databases/metagenomics/mgnify_genomes/human-gut/v2.0/species_catalogue/MGYG0000025/MGYG000002576/genome/MGYG000002576.fna	0.119814	3	0.000262098	3817.33	11011	2	444705	675888	90317	Human-Gut	0	1	0	0	NA	0	0	NA	3
./Cow-Rumen/ftp.ebi.ac.uk/pub/databases/metagenomics/mgnify_genomes/cow-rumen/v1.0/species_catalogue/MGYG0002931/MGYG000293127/genome/MGYG000293127.fna	0.121987	3	0.000276171	973.333	1387	746	635489	1320132	117362	Cow-Rumen	0	1	0	0	NA	0	0	NA	3
./Human-Gut/pub/databases/metagenomics/mgnify_genomes/human-gut/v2.0/species_catalogue/MGYG0000032/MGYG000003291/genome/MGYG000003291.fna	0.123883	3	0.00028884	51.3333	78	5	564860	1167559	223129	Human-Gut	3	0.00028884	95	205	9	0	0	NA	6
./Human-Gut/pub/databases/metagenomics/mgnify_genomes/human-gut/v2.0/species_catalogue/MGYG0000027/MGYG000002778/genome/MGYG000002778.fna	0.124773	3	0.000294917	4.33333	9	1	384811	1145780	3	Human-Gut	1	0.117303	22	22	22	0	0	NA	4
./Mouse-Gut/ftp.ebi.ac.uk/pub/databases/metagenomics/mgnify_genomes/mouse-gut/v1.0/species_catalogue/MGYG0004038/MGYG000403847/genome/MGYG000403847.fna	0.125564	3	0.000300385	22.3333	31	13	529051	1300781	91899	Mouse-Gut	5	2.34302e-07	291.4	525	112	0	0	NA	8
./Marine/ftp.ebi.ac.uk/pub/databases/metagenomics/mgnify_genomes/marine/v1.0/species_catalogue/MGYG0002971/MGYG000297131/genome/MGYG000297131.fna	0.126662	3	0.00030808	27	38	20	433311	979469	131563	Marine	2	0.00737539	128	137	119	0	0	NA	5
./Human-Gut/pub/databases/metagenomics/mgnify_genomes/human-gut/v2.0/species_catalogue/MGYG0000021/MGYG000002114/genome/MGYG000002114.fna	0.126975	3	0.000310295	40	41	38	220345	452095	99685	Human-Gut	1	0.119244	7	7	7	0	0	NA	4
./Cow-Rumen/ftp.ebi.ac.uk/pub/databases/metagenomics/mgnify_genomes/cow-rumen/v1.0/species_catalogue/MGYG0002955/MGYG000295571/genome/MGYG000295571.fna	0.127011	3	0.000310553	12974.3	17260	4918	217577	357087	64208	Cow-Rumen	1	0.119276	55	55	55	0	0	NA	4
./Human-Gut/pub/databases/metagenomics/mgnify_genomes/human-gut/v2.0/species_catalogue/MGYG0000029/MGYG000002978/genome/MGYG000002978.fna	0.127067	3	0.000310954	21.3333	40	5	529970	1200025	133252	Human-Gut	0	1	0	0	NA	0	0	NA	3
./Non-Model-Fish-Gut/ftp.ebi.ac.uk/pub/databases/metagenomics/mgnify_genomes/non-model-fish-gut/v2.0/species_catalogue/MGYG0002995/MGYG000299575/genome/MGYG000299575.fna	0.127506	3	0.000314085	21.6667	41	10	298542	447265	91592	Non-Model-Fish-Gut	3	0.000314085	48.3333	61	25	0	0	NA	6
./Pig-Gut/ftp.ebi.ac.uk/pub/databases/metagenomics/mgnify_genomes/pig-gut/v1.0/species_catalogue/MGYG0003015/MGYG000301590/genome/MGYG000301590.fna	0.12779	3	0.00031612	2166.33	3310	93	46525	92827	7142	Pig-Gut	1	0.119962	78	78	78	0	0	NA	4
./Pig-Gut/ftp.ebi.ac.uk/pub/databases/metagenomics/mgnify_genomes/pig-gut/v1.0/species_catalogue/MGYG0003020/MGYG000302020/genome/MGYG000302020.fna	0.128166	3	0.000318826	30	40	12	456415	1160504	103748	Pig-Gut	1	0.120293	18	18	18	0	0	NA	4
./Human-Gut/pub/databases/metagenomics/mgnify_genomes/human-gut/v2.0/species_catalogue/MGYG0000032/MGYG000003269/genome/MGYG000003269.fna	0.129415	3	0.000327934	17.3333	21	11	418897	1086411	53392	Human-Gut	3	0.000327934	117.667	204	38	0	0	NA	6
./Human-Gut/pub/databases/metagenomics/mgnify_genomes/human-gut/v2.0/species_catalogue/MGYG0000035/MGYG000003573/genome/MGYG000003573.fna	0.12962	3	0.000329442	4093.67	12277	2	558060	1226929	13367	Human-Gut	0	1	0	0	NA	0	0	NA	3
./Mouse-Gut/ftp.ebi.ac.uk/pub/databases/metagenomics/mgnify_genomes/mouse-gut/v1.0/species_catalogue/MGYG0004018/MGYG000401870/genome/MGYG000401870.fna	0.129621	3	0.000329453	33.3333	38	25	535957	986990	177579	Mouse-Gut	6	5.89559e-09	101	221	20	0	0	NA	9
./Cow-Rumen/ftp.ebi.ac.uk/pub/databases/metagenomics/mgnify_genomes/cow-rumen/v1.0/species_catalogue/MGYG0002926/MGYG000292647/genome/MGYG000292647.fna	0.130054	3	0.000332657	14430.3	35122	2635	318055	457440	220157	Cow-Rumen	1	0.121952	258	258	258	145	145	145	4
./Human-Gut/pub/databases/metagenomics/mgnify_genomes/human-gut/v2.0/species_catalogue/MGYG0000030/MGYG000003017/genome/MGYG000003017.fna	0.132481	3	0.000350993	62.6667	63	62	355077	617881	117685	Human-Gut	3	0.000350993	43.6667	78	18	0	0	NA	6
./Human-Gut/pub/databases/metagenomics/mgnify_genomes/human-gut/v2.0/species_catalogue/MGYG0000034/MGYG000003496/genome/MGYG000003496.fna	0.133225	3	0.000356748	11	15	9	169741	229711	68455	Human-Gut	2	0.00812431	157	170	144	0	0	NA	5
./Human-Gut/pub/databases/metagenomics/mgnify_genomes/human-gut/v2.0/species_catalogue/MGYG0000026/MGYG000002627/genome/MGYG000002627.fna	0.136146	3	0.000379899	12.6667	16	6	179543	380125	16	Human-Gut	5	3.48055e-07	78.6	146	11	0	0	NA	8
./Human-Gut/pub/databases/metagenomics/mgnify_genomes/human-gut/v2.0/species_catalogue/MGYG0000029/MGYG000002964/genome/MGYG000002964.fna	0.138453	3	0.000398857	26	30	19	611498	1173980	23058	Human-Gut	2	0.00874424	201	287	115	0	0	NA	5
./Human-Gut/pub/databases/metagenomics/mgnify_genomes/human-gut/v2.0/species_catalogue/MGYG0000036/MGYG000003680/genome/MGYG000003680.fna	0.139338	3	0.000406288	6	11	3	467154	770932	172132	Human-Gut	1	0.130066	101	101	101	0	0	NA	4
./Human-Gut/pub/databases/metagenomics/mgnify_genomes/human-gut/v2.0/species_catalogue/MGYG0000045/MGYG000004589/genome/MGYG000004589.fna	0.139662	3	0.000409027	2975	7861	3	759068	1936204	88697	Human-Gut	1	0.130348	53	53	53	0	0	NA	4
./Mouse-Gut/ftp.ebi.ac.uk/pub/databases/metagenomics/mgnify_genomes/mouse-gut/v1.0/species_catalogue/MGYG0003307/MGYG000330715/genome/MGYG000330715.fna	0.139923	3	0.000411245	37	43	30	389559	997743	50987	Mouse-Gut	1	0.130575	115	115	115	0	0	NA	4
./Mouse-Gut/ftp.ebi.ac.uk/pub/databases/metagenomics/mgnify_genomes/mouse-gut/v1.0/species_catalogue/MGYG0004104/MGYG000410456/genome/MGYG000410456.fna	0.140099	3	0.000412748	19.3333	39	5	753829	1626057	115056	Mouse-Gut	0	1	0	0	NA	0	0	NA	3
./Human-Gut/pub/databases/metagenomics/mgnify_genomes/human-gut/v2.0/species_catalogue/MGYG0000035/MGYG000003581/genome/MGYG000003581.fna	0.140307	3	0.000414522	9.33333	11	8	558561	1009404	143950	Human-Gut	5	4.03202e-07	83	202	2	0	0	NA	8
./Human-Oral/ftp.ebi.ac.uk/pub/databases/metagenomics/mgnify_genomes/human-oral/v1.0/species_catalogue/MGYG0002989/MGYG000298944/genome/MGYG000298944.fna	0.14038	3	0.000415143	19.6667	37	3	615411	1389209	24588	Human-Oral	2	0.00897787	66.5	74	59	0	0	NA	5
./Human-Gut/pub/databases/metagenomics/mgnify_genomes/human-gut/v2.0/species_catalogue/MGYG0000034/MGYG000003479/genome/MGYG000003479.fna	0.140967	3	0.000420192	14.3333	21	11	573442	1227711	41169	Human-Gut	10	7.77156e-16	47	65	15	0	0	NA	13
./Marine/ftp.ebi.ac.uk/pub/databases/metagenomics/mgnify_genomes/marine/v1.0/species_catalogue/MGYG0002962/MGYG000296250/genome/MGYG000296250.fna	0.0296606	2	0.000431275	13792.5	18856	8729	57707.5	85283	30132	Marine	0	1	0	0	NA	0	0	NA	2
./Mouse-Gut/ftp.ebi.ac.uk/pub/databases/metagenomics/mgnify_genomes/mouse-gut/v1.0/species_catalogue/MGYG0003307/MGYG000330755/genome/MGYG000330755.fna	0.142249	3	0.000431353	16	23	8	544630	725856	355453	Mouse-Gut	3	0.000431353	35.3333	79	12	0	0	NA	6
./Human-Gut/pub/databases/metagenomics/mgnify_genomes/human-gut/v2.0/species_catalogue/MGYG0000027/MGYG000002783/genome/MGYG000002783.fna	0.143994	3	0.000446834	11	19	6	47169	94584	9055	Human-Gut	1	0.134107	5	5	5	0	0	NA	4
./Marine/ftp.ebi.ac.uk/pub/databases/metagenomics/mgnify_genomes/marine/v1.0/species_catalogue/MGYG0002964/MGYG000296408/genome/MGYG000296408.fna	0.146854	3	0.000472992	354	1010	22	251445	479982	42858	Marine	6	1.22856e-08	352.667	652	2	0	0	NA	9
./Human-Gut/pub/databases/metagenomics/mgnify_genomes/human-gut/v2.0/species_catalogue/MGYG0000030/MGYG000003013/genome/MGYG000003013.fna	0.1486	3	0.000489426	41.3333	42	41	209558	584320	15265	Human-Gut	3	0.000489426	83.6667	98	71	0	0	NA	6
./Human-Oral/ftp.ebi.ac.uk/pub/databases/metagenomics/mgnify_genomes/human-oral/v1.0/species_catalogue/MGYG0002989/MGYG000298937/genome/MGYG000298937.fna	0.148663	3	0.000490024	28164.3	78422	11	640651	1094114	11	Human-Oral	1	0.138141	41	41	41	36	36	36	4
./Human-Gut/pub/databases/metagenomics/mgnify_genomes/human-gut/v2.0/species_catalogue/MGYG0000039/MGYG000003914/genome/MGYG000003914.fna	0.148748	3	0.000490835	7564.33	22627	27	628048	1027543	296843	Human-Gut	9	8.59313e-14	124.444	194	8	0	0	NA	12
./Human-Gut/pub/databases/metagenomics/mgnify_genomes/human-gut/v2.0/species_catalogue/MGYG0000012/MGYG000001217/genome/MGYG000001217.fna	0.148965	3	0.000492902	3	3	3	513606	1314199	96588	Human-Gut	2	0.0100526	155	263	47	0	0	NA	5
./Pig-Gut/ftp.ebi.ac.uk/pub/databases/metagenomics/mgnify_genomes/pig-gut/v1.0/species_catalogue/MGYG0003020/MGYG000302011/genome/MGYG000302011.fna	0.149353	3	0.000496624	300.333	883	8	234693	664324	10	Pig-Gut	1	0.138735	205	205	205	0	0	NA	4
./Marine/ftp.ebi.ac.uk/pub/databases/metagenomics/mgnify_genomes/marine/v1.0/species_catalogue/MGYG0002962/MGYG000296264/genome/MGYG000296264.fna	0.151058	3	0.000513174	13	19	6	211363	486145	57137	Marine	1	0.140202	65	65	65	0	0	NA	4
./Marine/ftp.ebi.ac.uk/pub/databases/metagenomics/mgnify_genomes/marine/v1.0/species_catalogue/MGYG0002971/MGYG000297162/genome/MGYG000297162.fna	0.15212	3	0.000523658	124	128	119	533268	759668	106769	Marine	5	5.98129e-07	31.6	59	3	0	0	NA	8
./Human-Gut/pub/databases/metagenomics/mgnify_genomes/human-gut/v2.0/species_catalogue/MGYG0000027/MGYG000002780/genome/MGYG000002780.fna	0.152433	3	0.000526773	15.3333	23	11	308398	761538	13388	Human-Gut	7	3.32088e-10	33.5714	70	11	0	0	NA	10
./Pig-Gut/ftp.ebi.ac.uk/pub/databases/metagenomics/mgnify_genomes/pig-gut/v1.0/species_catalogue/MGYG0003033/MGYG000303352/genome/MGYG000303352.fna	0.152443	3	0.000526876	32.6667	34	30	80872.3	158744	5201	Pig-Gut	2	0.0105034	67	119	15	0	0	NA	5
./Mouse-Gut/ftp.ebi.ac.uk/pub/databases/metagenomics/mgnify_genomes/mouse-gut/v1.0/species_catalogue/MGYG0003271/MGYG000327189/genome/MGYG000327189.fna	0.152894	3	0.000531385	21.6667	37	10	418240	1068369	2701	Mouse-Gut	6	1.55657e-08	28.1667	51	7	0	0	NA	9
./Human-Gut/pub/databases/metagenomics/mgnify_genomes/human-gut/v2.0/species_catalogue/MGYG0000034/MGYG000003466/genome/MGYG000003466.fna	0.153769	3	0.000540215	13	26	4	572166	996829	25077	Human-Gut	5	6.30405e-07	45.8	57	36	0	0	NA	8
./Mouse-Gut/ftp.ebi.ac.uk/pub/databases/metagenomics/mgnify_genomes/mouse-gut/v1.0/species_catalogue/MGYG0003227/MGYG000322725/genome/MGYG000322725.fna	0.154487	3	0.000547526	30	37	25	80643.3	204316	18485	Mouse-Gut	0	1	0	0	NA	0	0	NA	3
./Human-Gut/pub/databases/metagenomics/mgnify_genomes/human-gut/v2.0/species_catalogue/MGYG0000019/MGYG000001955/genome/MGYG000001955.fna	0.154829	3	0.000551022	5493.67	15397	1	748214	1185772	272487	Human-Gut	0	1	0	0	NA	0	0	NA	3
./Human-Gut/pub/databases/metagenomics/mgnify_genomes/human-gut/v2.0/species_catalogue/MGYG0000032/MGYG000003253/genome/MGYG000003253.fna	0.156939	3	0.000572959	7.66667	10	6	775194	1626880	164991	Human-Gut	5	6.96273e-07	107.2	191	8	0	0	NA	8
./Mouse-Gut/ftp.ebi.ac.uk/pub/databases/metagenomics/mgnify_genomes/mouse-gut/v1.0/species_catalogue/MGYG0003228/MGYG000322810/genome/MGYG000322810.fna	0.15761	3	0.000580052	19	39	7	186603	422871	58335	Mouse-Gut	4	2.2673e-05	32.25	47	21	139	139	139	7
./Human-Gut/pub/databases/metagenomics/mgnify_genomes/human-gut/v2.0/species_catalogue/MGYG0000032/MGYG000003200/genome/MGYG000003200.fna	0.161072	3	0.000617529	3	4	1	732195	1730482	2405	Human-Gut	3	0.000617529	108.667	143	90	0	0	NA	6
./Marine/ftp.ebi.ac.uk/pub/databases/metagenomics/mgnify_genomes/marine/v1.0/species_catalogue/MGYG0002965/MGYG000296512/genome/MGYG000296512.fna	0.161401	3	0.000621174	26.6667	63	8	718985	1128153	45962	Marine	3	0.000621174	221.667	333	48	0	0	NA	6
./Mouse-Gut/ftp.ebi.ac.uk/pub/databases/metagenomics/mgnify_genomes/mouse-gut/v1.0/species_catalogue/MGYG0003306/MGYG000330624/genome/MGYG000330624.fna	0.161927	3	0.000627012	9091	27181	21	815652	1092602	266977	Mouse-Gut	3	0.000627012	51.6667	86	28	0	0	NA	6
./Human-Gut/pub/databases/metagenomics/mgnify_genomes/human-gut/v2.0/species_catalogue/MGYG0000014/MGYG000001410/genome/MGYG000001410.fna	0.162467	3	0.00063306	240855	461192	78026	38123	87167	6681	Human-Gut	1	0.149956	5	5	5	10730	10730	10730	4
./Pig-Gut/ftp.ebi.ac.uk/pub/databases/metagenomics/mgnify_genomes/pig-gut/v1.0/species_catalogue/MGYG0003022/MGYG000302293/genome/MGYG000302293.fna	0.0361238	2	0.000636961	5.5	7	4	211250	389853	32648	Pig-Gut	0	1	0	0	NA	0	0	NA	2
./Mouse-Gut/ftp.ebi.ac.uk/pub/databases/metagenomics/mgnify_genomes/mouse-gut/v1.0/species_catalogue/MGYG0003281/MGYG000328197/genome/MGYG000328197.fna	0.163554	3	0.000645327	64340	95198	47517	658845	1202848	174923	Mouse-Gut	2	0.0120023	20.5	38	3	0	0	NA	5
./Chicken-Gut/ftp.ebi.ac.uk/pub/databases/metagenomics/mgnify_genomes/chicken-gut/v1.0/species_catalogue/MGYG0003173/MGYG000317321/genome/MGYG000317321.fna	0.164658	3	0.00065794	9542	19422	2921	506785	915717	191568	Chicken-Gut	1	0.151816	10	10	10	0	0	NA	4
./Mouse-Gut/ftp.ebi.ac.uk/pub/databases/metagenomics/mgnify_genomes/mouse-gut/v1.0/species_catalogue/MGYG0003272/MGYG000327261/genome/MGYG000327261.fna	0.165323	3	0.00066562	36.6667	41	34	427341	946018	127445	Mouse-Gut	5	8.96965e-07	61.8	108	27	0	0	NA	8
./Mouse-Gut/ftp.ebi.ac.uk/pub/databases/metagenomics/mgnify_genomes/mouse-gut/v1.0/species_catalogue/MGYG0003807/MGYG000380726/genome/MGYG000380726.fna	0.165768	3	0.00067078	347.333	1026	7	142721	419297	11	Mouse-Gut	2	0.0123114	33	35	31	109	109	109	5
./Cow-Rumen/ftp.ebi.ac.uk/pub/databases/metagenomics/mgnify_genomes/cow-rumen/v1.0/species_catalogue/MGYG0002926/MGYG000292633/genome/MGYG000292633.fna	0.167077	3	0.000686134	27700	61578	6695	66870.7	93580	41887	Cow-Rumen	1	0.153866	61	61	61	112	112	112	4
./Honeybee-Gut/ftp.ebi.ac.uk/pub/databases/metagenomics/mgnify_genomes/honeybee-gut/v1.0/species_catalogue/MGYG0003213/MGYG000321340/genome/MGYG000321340.fna	0.169022	3	0.000709343	30.3333	48	6	335751	466064	118947	Honeybee-Gut	2	0.0127722	244	326	162	0	0	NA	5
./Mouse-Gut/ftp.ebi.ac.uk/pub/databases/metagenomics/mgnify_genomes/mouse-gut/v1.0/species_catalogue/MGYG0003294/MGYG000329478/genome/MGYG000329478.fna	0.169447	3	0.000714486	38.6667	40	37	283623	377524	101965	Mouse-Gut	2	0.012833	110	140	80	0	0	NA	5
./Marine/ftp.ebi.ac.uk/pub/databases/metagenomics/mgnify_genomes/marine/v1.0/species_catalogue/MGYG0002966/MGYG000296602/genome/MGYG000296602.fna	0.173218	3	0.000761127	24.3333	55	5	305704	703437	106404	Marine	1	0.159046	243	243	243	0	0	NA	4
./Chicken-Gut/ftp.ebi.ac.uk/pub/databases/metagenomics/mgnify_genomes/chicken-gut/v1.0/species_catalogue/MGYG0003158/MGYG000315858/genome/MGYG000315858.fna	0.174864	3	0.000782073	50543.7	141005	743	969805	2088905	308769	Chicken-Gut	0	1	0	0	NA	0	0	NA	3
./Mouse-Gut/ftp.ebi.ac.uk/pub/databases/metagenomics/mgnify_genomes/mouse-gut/v1.0/species_catalogue/MGYG0003235/MGYG000323596/genome/MGYG000323596.fna	0.175775	3	0.000793816	120323	360944	2	942682	2095729	2703	Mouse-Gut	1	0.161193	8	8	8	0	0	NA	4
./Marine/ftp.ebi.ac.uk/pub/databases/metagenomics/mgnify_genomes/marine/v1.0/species_catalogue/MGYG0002972/MGYG000297200/genome/MGYG000297200.fna	0.178907	3	0.000835063	22.6667	40	12	634435	1694891	103241	Marine	1	0.163816	2	2	2	0	0	NA	4
./Cow-Rumen/ftp.ebi.ac.uk/pub/databases/metagenomics/mgnify_genomes/cow-rumen/v1.0/species_catalogue/MGYG0002904/MGYG000290486/genome/MGYG000290486.fna	0.17896	3	0.000835778	10083.3	21775	808	424227	776825	41432	Cow-Rumen	0	1	0	0	NA	0	0	NA	3
./Human-Gut/pub/databases/metagenomics/mgnify_genomes/human-gut/v2.0/species_catalogue/MGYG0000029/MGYG000002943/genome/MGYG000002943.fna	0.180159	3	0.000851922	1848.67	5528	8	753545	1733894	69168	Human-Gut	1	0.164862	187	187	187	0	0	NA	4
./Human-Gut/pub/databases/metagenomics/mgnify_genomes/human-gut/v2.0/species_catalogue/MGYG0000034/MGYG000003493/genome/MGYG000003493.fna	0.180297	3	0.000853795	19.6667	21	17	921245	2086054	121398	Human-Gut	2	0.0144258	85	143	27	0	0	NA	5
./Marine/ftp.ebi.ac.uk/pub/databases/metagenomics/mgnify_genomes/marine/v1.0/species_catalogue/MGYG0002965/MGYG000296590/genome/MGYG000296590.fna	0.182053	3	0.000877842	510.333	948	291	894516	1901188	47272	Marine	0	1	0	0	NA	0	0	NA	3
./Mouse-Gut/ftp.ebi.ac.uk/pub/databases/metagenomics/mgnify_genomes/mouse-gut/v1.0/species_catalogue/MGYG0003313/MGYG000331308/genome/MGYG000331308.fna	0.183731	3	0.000901211	67.3333	94	35	173824	285525	44524	Mouse-Gut	4	4.10089e-05	91.5	123	63	0	0	NA	7
./Mouse-Gut/ftp.ebi.ac.uk/pub/databases/metagenomics/mgnify_genomes/mouse-gut/v1.0/species_catalogue/MGYG0003308/MGYG000330877/genome/MGYG000330877.fna	0.0435761	2	0.0009223	14	24	4	169402	228748	110056	Mouse-Gut	6	9.16089e-12	77.6667	114	51	0	0	NA	8
./Human-Gut/pub/databases/metagenomics/mgnify_genomes/human-gut/v2.0/species_catalogue/MGYG0000016/MGYG000001664/genome/MGYG000001664.fna	0.187822	3	0.000959843	10.3333	19	4	520775	681522	237384	Human-Gut	7	1.3884e-09	38	63	5	0	0	NA	10
./Pig-Gut/ftp.ebi.ac.uk/pub/databases/metagenomics/mgnify_genomes/pig-gut/v1.0/species_catalogue/MGYG0003028/MGYG000302846/genome/MGYG000302846.fna	0.188093	3	0.000963817	3026	5307	376	388674	606495	130018	Pig-Gut	1	0.171463	4	4	4	0	0	NA	4
./Honeybee-Gut/ftp.ebi.ac.uk/pub/databases/metagenomics/mgnify_genomes/honeybee-gut/v1.0/species_catalogue/MGYG0003212/MGYG000321290/genome/MGYG000321290.fna	0.0451791	2	0.00099035	28	35	21	233504	388010	78997	Honeybee-Gut	0	1	0	0	NA	0	0	NA	2
./Mouse-Gut/ftp.ebi.ac.uk/pub/databases/metagenomics/mgnify_genomes/mouse-gut/v1.0/species_catalogue/MGYG0004100/MGYG000410098/genome/MGYG000410098.fna	0.190163	3	0.000994453	11.3333	21	6	1060000	1831365	501066	Mouse-Gut	0	1	0	0	NA	0	0	NA	3
./Human-Gut/pub/databases/metagenomics/mgnify_genomes/human-gut/v2.0/species_catalogue/MGYG0000035/MGYG000003543.1/genome/MGYG000003543.1.fna	0.191479	3	0.00101426	9.33333	14	3	957052	1964604	303616	Human-Gut	4	4.808e-05	226.25	302	149	0	0	NA	7
./Mouse-Gut/ftp.ebi.ac.uk/pub/databases/metagenomics/mgnify_genomes/mouse-gut/v1.0/species_catalogue/MGYG0003309/MGYG000330916/genome/MGYG000330916.fna	0.047445	2	0.00109054	26.5	28	25	308954	546698	71209	Mouse-Gut	0	1	0	0	NA	0	0	NA	2
./Human-Gut/pub/databases/metagenomics/mgnify_genomes/human-gut/v2.0/species_catalogue/MGYG0000028/MGYG000002837/genome/MGYG000002837.fna	0.198048	3	0.00111679	56547.7	129279	349	1056878	2043762	551082	Human-Gut	1	0.179669	7	7	7	0	0	NA	4
./Chicken-Gut/ftp.ebi.ac.uk/pub/databases/metagenomics/mgnify_genomes/chicken-gut/v1.0/species_catalogue/MGYG0003136/MGYG000313684/genome/MGYG000313684.fna	0.19821	3	0.00111941	22094.3	49582	2185	943507	2028132	14516	Chicken-Gut	1	0.179802	139	139	139	0	0	NA	4
./Mouse-Gut/ftp.ebi.ac.uk/pub/databases/metagenomics/mgnify_genomes/mouse-gut/v1.0/species_catalogue/MGYG0003241/MGYG000324148/genome/MGYG000324148.fna	0.198726	3	0.00112775	13035.3	19484	9120	1010000	1304254	686917	Mouse-Gut	1	0.180226	7	7	7	0	0	NA	4
./Pig-Gut/ftp.ebi.ac.uk/pub/databases/metagenomics/mgnify_genomes/pig-gut/v1.0/species_catalogue/MGYG0003016/MGYG000301660/genome/MGYG000301660.fna	0.199724	3	0.00114397	34.3333	41	30	710087	1166198	20915	Pig-Gut	3	0.00114397	214.667	302	141	0	0	NA	6
./Mouse-Gut/ftp.ebi.ac.uk/pub/databases/metagenomics/mgnify_genomes/mouse-gut/v1.0/species_catalogue/MGYG0003242/MGYG000324289/genome/MGYG000324289.fna	0.204783	3	0.0012285	3740.67	11179	7	741216	1825699	12331	Mouse-Gut	1	0.185176	48	48	48	0	0	NA	4
./Mouse-Gut/ftp.ebi.ac.uk/pub/databases/metagenomics/mgnify_genomes/mouse-gut/v1.0/species_catalogue/MGYG0003294/MGYG000329400/genome/MGYG000329400.fna	0.204915	3	0.00123076	2888.33	8587	39	73958.3	178828	5984	Mouse-Gut	0	1	0	0	NA	0	0	NA	3
./Marine/ftp.ebi.ac.uk/pub/databases/metagenomics/mgnify_genomes/marine/v1.0/species_catalogue/MGYG0002974/MGYG000297423/genome/MGYG000297423.fna	0.205426	3	0.00123952	111	294	15	287089	812223	19992	Marine	4	6.29924e-05	138	236	68	0	0	NA	7
./Mouse-Gut/ftp.ebi.ac.uk/pub/databases/metagenomics/mgnify_genomes/mouse-gut/v1.0/species_catalogue/MGYG0003266/MGYG000326629/genome/MGYG000326629.fna	0.0506738	2	0.00124135	38	39	37	357802	674629	40976	Mouse-Gut	4	2.63834e-07	96.75	154	19	0	0	NA	6
./Mouse-Gut/ftp.ebi.ac.uk/pub/databases/metagenomics/mgnify_genomes/mouse-gut/v1.0/species_catalogue/MGYG0004040/MGYG000404023/genome/MGYG000404023.fna	0.205535	3	0.00124139	23.3333	39	14	763069	1134721	308760	Mouse-Gut	2	0.0184394	118.5	138	99	0	0	NA	5
./Chicken-Gut/ftp.ebi.ac.uk/pub/databases/metagenomics/mgnify_genomes/chicken-gut/v1.0/species_catalogue/MGYG0003137/MGYG000313770/genome/MGYG000313770.fna	0.206062	3	0.00125047	45089	82037	15971	990653	1602776	579911	Chicken-Gut	1	0.186217	55	55	55	0	0	NA	4
./Pig-Gut/ftp.ebi.ac.uk/pub/databases/metagenomics/mgnify_genomes/pig-gut/v1.0/species_catalogue/MGYG0003020/MGYG000302005/genome/MGYG000302005.fna	0.0509804	2	0.00125617	1188.5	1452	925	318630	585305	51954	Pig-Gut	1	0.0497027	36	36	36	0	0	NA	3
./Mouse-Gut/ftp.ebi.ac.uk/pub/databases/metagenomics/mgnify_genomes/mouse-gut/v1.0/species_catalogue/MGYG0003282/MGYG000328213/genome/MGYG000328213.fna	0.209154	3	0.0013046	31.3333	38	21	916649	1508607	188823	Mouse-Gut	10	3.65263e-14	58.4	104	12	0	0	NA	13
./Human-Gut/pub/databases/metagenomics/mgnify_genomes/human-gut/v2.0/species_catalogue/MGYG0000010/MGYG000001035/genome/MGYG000001035.fna	0.211704	3	0.00135037	7.66667	13	5	819574	1740222	307837	Human-Gut	3	0.00135037	645	960	278	0	0	NA	6
./Mouse-Gut/ftp.ebi.ac.uk/pub/databases/metagenomics/mgnify_genomes/mouse-gut/v1.0/species_catalogue/MGYG0003225/MGYG000322581/genome/MGYG000322581.fna	0.21301	3	0.00137416	3342.33	9950	38	200904	602657	15	Mouse-Gut	1	0.191852	29	29	29	70	70	70	4
./Mouse-Gut/ftp.ebi.ac.uk/pub/databases/metagenomics/mgnify_genomes/mouse-gut/v1.0/species_catalogue/MGYG0003274/MGYG000327481/genome/MGYG000327481.fna	0.216881	3	0.0014463	35	36	34	516131	921363	43153	Mouse-Gut	1	0.194974	39	39	39	0	0	NA	4
./Mouse-Gut/ftp.ebi.ac.uk/pub/databases/metagenomics/mgnify_genomes/mouse-gut/v1.0/species_catalogue/MGYG0003281/MGYG000328196/genome/MGYG000328196.fna	0.216888	3	0.00144644	26.3333	38	5	898465	1826506	92576	Mouse-Gut	2	0.0203807	30.5	41	20	0	0	NA	5
./Mouse-Gut/ftp.ebi.ac.uk/pub/databases/metagenomics/mgnify_genomes/mouse-gut/v1.0/species_catalogue/MGYG0003291/MGYG000329166/genome/MGYG000329166.fna	0.220619	3	0.00151816	43758.7	59533	20253	783392	1401233	413781	Mouse-Gut	0	1	0	0	NA	0	0	NA	3
./Mouse-Gut/ftp.ebi.ac.uk/pub/databases/metagenomics/mgnify_genomes/mouse-gut/v1.0/species_catalogue/MGYG0003885/MGYG000388556/genome/MGYG000388556.fna	0.0572526	2	0.0015777	11	13	9	52933.5	68926	36941	Mouse-Gut	3	2.99649e-05	36	59	23	140	175	121	5
./Marine/ftp.ebi.ac.uk/pub/databases/metagenomics/mgnify_genomes/marine/v1.0/species_catalogue/MGYG0002974/MGYG000297406/genome/MGYG000297406.fna	0.225271	3	0.00161066	31.6667	53	7	1021888	1709462	666967	Marine	0	1	0	0	NA	0	0	NA	3
./Human-Vaginal/ftp.ebi.ac.uk/pub/databases/metagenomics/mgnify_genomes/human-vaginal/v1.0/species_catalogue/MGYG0003038/MGYG000303864/genome/MGYG000303864.fna	0.0610859	2	0.00179148	49.5	59	40	231113	415447	46779	Human-Vaginal	2	0.00179148	74.5	110	39	0	0	NA	4
./Marine/ftp.ebi.ac.uk/pub/databases/metagenomics/mgnify_genomes/marine/v1.0/species_catalogue/MGYG0002964/MGYG000296441/genome/MGYG000296441.fna	0.241423	3	0.00195897	4774.67	12429	60	1170000	2073466	1835	Marine	4	0.000116779	46	100	2	0	0	NA	7
./Pig-Gut/ftp.ebi.ac.uk/pub/databases/metagenomics/mgnify_genomes/pig-gut/v1.0/species_catalogue/MGYG0003009/MGYG000300957/genome/MGYG000300957.fna	0.0643288	2	0.00198247	40	43	37	288110	350264	225956	Pig-Gut	0	1	0	0	NA	0	0	NA	2
./Cow-Rumen/ftp.ebi.ac.uk/pub/databases/metagenomics/mgnify_genomes/cow-rumen/v1.0/species_catalogue/MGYG0002948/MGYG000294891/genome/MGYG000294891.fna	0.242831	3	0.00199136	14198.3	18319	8614	432495	822002	120932	Cow-Rumen	2	0.0251182	37.5	70	5	89	89	89	5
./Mouse-Gut/ftp.ebi.ac.uk/pub/databases/metagenomics/mgnify_genomes/mouse-gut/v1.0/species_catalogue/MGYG0004115/MGYG000411503/genome/MGYG000411503.fna	0.245607	3	0.00205623	103726	236960	4560	1270000	2834294	151162	Mouse-Gut	0	1	0	0	NA	0	0	NA	3
./Human-Gut/pub/databases/metagenomics/mgnify_genomes/human-gut/v2.0/species_catalogue/MGYG0000034/MGYG000003443/genome/MGYG000003443.fna	0.0656127	2	0.00206063	16	22	10	401110	582669	219552	Human-Gut	4	7.32771e-07	73.75	91	49	0	0	NA	6
./Mouse-Gut/ftp.ebi.ac.uk/pub/databases/metagenomics/mgnify_genomes/mouse-gut/v1.0/species_catalogue/MGYG0003906/MGYG000390611/genome/MGYG000390611.fna	0.0673036	2	0.00216578	4.5	5	4	97914.5	119448	76381	Mouse-Gut	1	0.0650887	59	59	59	85	85	85	3
./Human-Gut/pub/databases/metagenomics/mgnify_genomes/human-gut/v2.0/species_catalogue/MGYG0000021/MGYG000002112/genome/MGYG000002112.fna	0.0684263	2	0.00223697	578.5	1122	35	464734	580542	348927	Human-Gut	2	0.00223697	156	273	39	0	0	NA	4
./Mouse-Gut/ftp.ebi.ac.uk/pub/databases/metagenomics/mgnify_genomes/mouse-gut/v1.0/species_catalogue/MGYG0003253/MGYG000325371/genome/MGYG000325371.fna	0.253783	3	0.00225479	29350	53694	11368	1380000	2912294	53694	Mouse-Gut	1	0.22414	10	10	10	0	0	NA	4
./Pig-Gut/ftp.ebi.ac.uk/pub/databases/metagenomics/mgnify_genomes/pig-gut/v1.0/species_catalogue/MGYG0003019/MGYG000301964/genome/MGYG000301964.fna	0.0694054	2	0.00229996	18.5	36	1	56379	89042	23716	Pig-Gut	3	5.29007e-05	29.3333	33	26	0	0	NA	5
./Human-Gut/pub/databases/metagenomics/mgnify_genomes/human-gut/v2.0/species_catalogue/MGYG0000026/MGYG000002649/genome/MGYG000002649.fna	0.069568	2	0.0023105	7.5	11	4	254173	311908	196438	Human-Gut	3	5.32669e-05	49	95	22	0	0	NA	5
./Marine/ftp.ebi.ac.uk/pub/databases/metagenomics/mgnify_genomes/marine/v1.0/species_catalogue/MGYG0002971/MGYG000297151/genome/MGYG000297151.fna	0.256555	3	0.00232472	26.3333	41	18	701152	1714058	157025	Marine	2	0.0277878	109	174	44	0	0	NA	5
./Marine/ftp.ebi.ac.uk/pub/databases/metagenomics/mgnify_genomes/marine/v1.0/species_catalogue/MGYG0002972/MGYG000297267/genome/MGYG000297267.fna	0.0705032	2	0.00237156	15.5	26	5	360206	589632	130780	Marine	4	9.73099e-07	201	277	17	0	0	NA	6
./Mouse-Gut/ftp.ebi.ac.uk/pub/databases/metagenomics/mgnify_genomes/mouse-gut/v1.0/species_catalogue/MGYG0003293/MGYG000329306/genome/MGYG000329306.fna	0.0707799	2	0.00238978	29.5	39	20	192598	377416	7780	Mouse-Gut	3	5.60487e-05	19.6667	30	4	0	0	NA	5
./Human-Gut/pub/databases/metagenomics/mgnify_genomes/human-gut/v2.0/species_catalogue/MGYG0000034/MGYG000003400/genome/MGYG000003400.fna	0.26017	3	0.0024179	12	23	3	1270000	3464897	64013	Human-Gut	5	8.00283e-06	43.6	61	30	0	0	NA	8
./Human-Oral/ftp.ebi.ac.uk/pub/databases/metagenomics/mgnify_genomes/human-oral/v1.0/species_catalogue/MGYG0002981/MGYG000298177/genome/MGYG000298177.fna	0.0715916	2	0.00244359	12.5	19	6	136592	159674	113509	Human-Oral	2	0.00244359	120.5	144	97	0	0	NA	4
./Marine/ftp.ebi.ac.uk/pub/databases/metagenomics/mgnify_genomes/marine/v1.0/species_catalogue/MGYG0002964/MGYG000296472/genome/MGYG000296472.fna	0.0740588	2	0.00261064	24	30	18	212235	231264	193206	Marine	0	1	0	0	NA	0	0	NA	2
./Human-Gut/pub/databases/metagenomics/mgnify_genomes/human-gut/v2.0/species_catalogue/MGYG0000036/MGYG000003646/genome/MGYG000003646.fna	0.0755312	2	0.00271284	2.5	3	2	500570	543531	457609	Human-Gut	4	1.27669e-06	32	61	14	0	0	NA	6
./Honeybee-Gut/ftp.ebi.ac.uk/pub/databases/metagenomics/mgnify_genomes/honeybee-gut/v1.0/species_catalogue/MGYG0003212/MGYG000321270/genome/MGYG000321270.fna	0.271472	3	0.00272402	36.6667	39	35	425407	890622	82352	Honeybee-Gut	4	0.000182308	103.5	176	61	0	0	NA	7
./Human-Gut/pub/databases/metagenomics/mgnify_genomes/human-gut/v2.0/species_catalogue/MGYG0000049/MGYG000004905/genome/MGYG000004905.fna	0.0759515	2	0.00274234	26.5	37	16	289882	359890	219874	Human-Gut	1	0.0731388	50	50	50	0	0	NA	3
./Pig-Gut/ftp.ebi.ac.uk/pub/databases/metagenomics/mgnify_genomes/pig-gut/v1.0/species_catalogue/MGYG0003032/MGYG000303214/genome/MGYG000303214.fna	0.0774363	2	0.00284781	33	34	32	405135	792144	18126	Pig-Gut	4	1.40831e-06	56.25	140	14	0	0	NA	6
./Human-Gut/pub/databases/metagenomics/mgnify_genomes/human-gut/v2.0/species_catalogue/MGYG0000037/MGYG000003743/genome/MGYG000003743.fna	0.0774654	2	0.0028499	2.5	4	1	372217	579437	164997	Human-Gut	5	2.17946e-08	103.6	180	41	0	0	NA	7
./Human-Gut/pub/databases/metagenomics/mgnify_genomes/human-gut/v2.0/species_catalogue/MGYG0000004/MGYG000000469/genome/MGYG000000469.fna	0.0779034	2	0.00288138	2	2	2	371954	658049	85860	Human-Gut	1	0.0749462	13	13	13	0	0	NA	3
./Human-Gut/pub/databases/metagenomics/mgnify_genomes/human-gut/v2.0/species_catalogue/MGYG0000017/MGYG000001724/genome/MGYG000001724.fna	0.0782551	2	0.00290678	285.5	569	2	97388	143185	51591	Human-Gut	6	2.98287e-10	190	338	45	0	0	NA	8
./Human-Vaginal/ftp.ebi.ac.uk/pub/databases/metagenomics/mgnify_genomes/human-vaginal/v1.0/species_catalogue/MGYG0003042/MGYG000304294/genome/MGYG000304294.fna	0.0787075	2	0.00293961	35335.5	70279	392	602316	1111147	93485	Human-Vaginal	0	1	0	0	NA	0	0	NA	2
./Pig-Gut/ftp.ebi.ac.uk/pub/databases/metagenomics/mgnify_genomes/pig-gut/v1.0/species_catalogue/MGYG0003016/MGYG000301695/genome/MGYG000301695.fna	0.0792463	2	0.00297893	15	26	4	603466	968983	237950	Pig-Gut	1	0.0761876	70	70	70	0	0	NA	3
./Human-Oral/ftp.ebi.ac.uk/pub/databases/metagenomics/mgnify_genomes/human-oral/v1.0/species_catalogue/MGYG0002984/MGYG000298474/genome/MGYG000298474.fna	0.0797192	2	0.00301364	9096	18184	8	569914	913927	225902	Human-Oral	0	1	0	0	NA	0	0	NA	2
./Mouse-Gut/ftp.ebi.ac.uk/pub/databases/metagenomics/mgnify_genomes/mouse-gut/v1.0/species_catalogue/MGYG0003346/MGYG000334616/genome/MGYG000334616.fna	0.0798088	2	0.00302024	3494.5	6988	1	1573	3107	39	Mouse-Gut	0	1	0	0	NA	0	0	NA	2
./Human-Gut/pub/databases/metagenomics/mgnify_genomes/human-gut/v2.0/species_catalogue/MGYG0000037/MGYG000003793/genome/MGYG000003793.fna	0.0804628	2	0.00306861	22.5	28	17	337285	373565	301005	Human-Gut	1	0.0773107	55	55	55	0	0	NA	3
./Mouse-Gut/ftp.ebi.ac.uk/pub/databases/metagenomics/mgnify_genomes/mouse-gut/v1.0/species_catalogue/MGYG0003304/MGYG000330469/genome/MGYG000330469.fna	0.0809863	2	0.00310759	19	23	15	448726	795774	101679	Mouse-Gut	4	1.6801e-06	63.25	84	31	0	0	NA	6
./Human-Gut/pub/databases/metagenomics/mgnify_genomes/human-gut/v2.0/species_catalogue/MGYG0000007/MGYG000000709/genome/MGYG000000709.fna	0.0810197	2	0.00311009	2037	3525	549	400676	706492	94860	Human-Gut	1	0.0778245	400	400	400	0	0	NA	3
./Human-Gut/pub/databases/metagenomics/mgnify_genomes/human-gut/v2.0/species_catalogue/MGYG0000037/MGYG000003776/genome/MGYG000003776.fna	0.0814952	2	0.00314571	4	5	3	42221	71545	12897	Human-Gut	5	2.79906e-08	146.4	303	67	0	0	NA	7
./Human-Gut/pub/databases/metagenomics/mgnify_genomes/human-gut/v2.0/species_catalogue/MGYG0000019/MGYG000001922/genome/MGYG000001922.fna	0.0818384	2	0.00317155	18037	19134	16940	517294	1000876	33711	Human-Gut	0	1	0	0	NA	0	0	NA	2
./Human-Gut/pub/databases/metagenomics/mgnify_genomes/human-gut/v2.0/species_catalogue/MGYG0000039/MGYG000003917/genome/MGYG000003917.fna	0.0822362	2	0.00320161	36	36	36	438733	820803	56663	Human-Gut	4	1.78446e-06	251	339	112	0	0	NA	6
./Mouse-Gut/ftp.ebi.ac.uk/pub/databases/metagenomics/mgnify_genomes/mouse-gut/v1.0/species_catalogue/MGYG0004105/MGYG000410598/genome/MGYG000410598.fna	0.0823242	2	0.00320828	1173.5	2341	6	676661	1214097	139225	Mouse-Gut	0	1	0	0	NA	0	0	NA	2
./Mouse-Gut/ftp.ebi.ac.uk/pub/databases/metagenomics/mgnify_genomes/mouse-gut/v1.0/species_catalogue/MGYG0003757/MGYG000375728/genome/MGYG000375728.fna	0.0829339	2	0.00325466	12	23	1	458934	818691	99177	Mouse-Gut	6	4.20931e-10	172.5	242	70	0	0	NA	8
./Human-Gut/pub/databases/metagenomics/mgnify_genomes/human-gut/v2.0/species_catalogue/MGYG0000039/MGYG000003953/genome/MGYG000003953.fna	0.0833027	2	0.00328287	2252	4502	2	667790	817575	518006	Human-Gut	3	9.05211e-05	287.333	389	203	0	0	NA	5
./Pig-Gut/ftp.ebi.ac.uk/pub/databases/metagenomics/mgnify_genomes/pig-gut/v1.0/species_catalogue/MGYG0003024/MGYG000302476/genome/MGYG000302476.fna	0.0843331	2	0.00336229	12688	22139	3237	352954	614022	91887	Pig-Gut	0	1	0	0	NA	0	0	NA	2
./Human-Gut/pub/databases/metagenomics/mgnify_genomes/human-gut/v2.0/species_catalogue/MGYG0000048/MGYG000004811/genome/MGYG000004811.fna	0.0845449	2	0.00337873	29.5	41	18	65915.5	89104	42727	Human-Gut	0	1	0	0	NA	0	0	NA	2
./Human-Gut/pub/databases/metagenomics/mgnify_genomes/human-gut/v2.0/species_catalogue/MGYG0000037/MGYG000003751/genome/MGYG000003751.fna	0.0863131	2	0.00351741	12.5	13	12	297906	345046	250767	Human-Gut	3	0.000100467	15.3333	27	4	0	0	NA	5
./Human-Gut/pub/databases/metagenomics/mgnify_genomes/human-gut/v2.0/species_catalogue/MGYG0000010/MGYG000001032/genome/MGYG000001032.fna	0.0875824	2	0.00361859	3	5	1	488530	719355	257705	Human-Gut	3	0.000104866	290.333	426	105	0	0	NA	5
./Mouse-Gut/ftp.ebi.ac.uk/pub/databases/metagenomics/mgnify_genomes/mouse-gut/v1.0/species_catalogue/MGYG0003312/MGYG000331216/genome/MGYG000331216.fna	0.0879598	2	0.00364893	20	35	5	189818	228956	150681	Mouse-Gut	2	0.00364893	46	73	19	0	0	NA	4
./Human-Oral/ftp.ebi.ac.uk/pub/databases/metagenomics/mgnify_genomes/human-oral/v1.0/species_catalogue/MGYG0002990/MGYG000299064/genome/MGYG000299064.fna	0.0879632	2	0.0036492	25.5	32	19	269754	404441	135066	Human-Oral	2	0.0036492	163.5	167	160	0	0	NA	4
./Human-Gut/pub/databases/metagenomics/mgnify_genomes/human-gut/v2.0/species_catalogue/MGYG0000030/MGYG000003010/genome/MGYG000003010.fna	0.0879751	2	0.00365016	36	41	31	41716.5	68742	14691	Human-Gut	4	2.32652e-06	81.75	130	57	0	0	NA	6
./Human-Vaginal/ftp.ebi.ac.uk/pub/databases/metagenomics/mgnify_genomes/human-vaginal/v1.0/species_catalogue/MGYG0003039/MGYG000303964/genome/MGYG000303964.fna	0.0890208	2	0.00373487	35.5	37	34	455428	573497	337360	Human-Vaginal	1	0.0851735	79	79	79	0	0	NA	3
./Human-Gut/pub/databases/metagenomics/mgnify_genomes/human-gut/v2.0/species_catalogue/MGYG0000030/MGYG000003000/genome/MGYG000003000.fna	0.089137	2	0.00374433	13.5	23	4	442672	691691	193652	Human-Gut	5	4.35395e-08	111.2	161	47	0	0	NA	7
./Human-Gut/pub/databases/metagenomics/mgnify_genomes/human-gut/v2.0/species_catalogue/MGYG0000025/MGYG000002554/genome/MGYG000002554.fna	0.0891996	2	0.00374944	178.5	354	3	294372	502801	85942	Human-Gut	0	1	0	0	NA	0	0	NA	2
./Human-Gut/pub/databases/metagenomics/mgnify_genomes/human-gut/v2.0/species_catalogue/MGYG0000035/MGYG000003558/genome/MGYG000003558.fna	0.0895602	2	0.00377891	6.5	9	4	359110	508839	209382	Human-Gut	2	0.00377891	20	36	4	0	0	NA	4
./Human-Gut/pub/databases/metagenomics/mgnify_genomes/human-gut/v2.0/species_catalogue/MGYG0000020/MGYG000002094/genome/MGYG000002094.fna	0.0897427	2	0.00379387	50	62	38	477832	486016	469649	Human-Gut	2	0.00379387	141	189	93	0	0	NA	4
./Chicken-Gut/ftp.ebi.ac.uk/pub/databases/metagenomics/mgnify_genomes/chicken-gut/v1.0/species_catalogue/MGYG0003171/MGYG000317183/genome/MGYG000317183.fna	0.0910186	2	0.00389922	3073.5	5419	728	482370	852513	112226	Chicken-Gut	0	1	0	0	NA	0	0	NA	2
./Pig-Gut/ftp.ebi.ac.uk/pub/databases/metagenomics/mgnify_genomes/pig-gut/v1.0/species_catalogue/MGYG0003031/MGYG000303185/genome/MGYG000303185.fna	0.0925192	2	0.00402486	34	35	33	38181	43930	32432	Pig-Gut	3	0.000123163	89	167	8	0	0	NA	5
./Marine/ftp.ebi.ac.uk/pub/databases/metagenomics/mgnify_genomes/marine/v1.0/species_catalogue/MGYG0002970/MGYG000297084/genome/MGYG000297084.fna	0.0925673	2	0.00402891	11592.5	23181	4	131797	238047	25547	Marine	0	1	0	0	NA	0	0	NA	2
./Mouse-Gut/ftp.ebi.ac.uk/pub/databases/metagenomics/mgnify_genomes/mouse-gut/v1.0/species_catalogue/MGYG0003312/MGYG000331222/genome/MGYG000331222.fna	0.0930808	2	0.00407236	13	23	3	98315	113366	83264	Mouse-Gut	3	0.000125367	51.6667	85	20	0	0	NA	5
./Cow-Rumen/ftp.ebi.ac.uk/pub/databases/metagenomics/mgnify_genomes/cow-rumen/v1.0/species_catalogue/MGYG0002918/MGYG000291845/genome/MGYG000291845.fna	0.0933903	2	0.00409864	10335.5	14584	6087	528394	800211	256578	Cow-Rumen	2	0.00409865	28	45	11	0	0	NA	4
./Mouse-Gut/ftp.ebi.ac.uk/pub/databases/metagenomics/mgnify_genomes/mouse-gut/v1.0/species_catalogue/MGYG0003253/MGYG000325347/genome/MGYG000325347.fna	0.0950779	2	0.00424337	1672	3103	241	250180	384603	115757	Mouse-Gut	0	1	0	0	NA	0	0	NA	2
./Human-Gut/pub/databases/metagenomics/mgnify_genomes/human-gut/v2.0/species_catalogue/MGYG0000037/MGYG000003737/genome/MGYG000003737.fna	0.0952244	2	0.00425604	12.5	13	12	437670	861981	13360	Human-Gut	3	0.000134014	29	43	6	0	0	NA	5
./Human-Gut/pub/databases/metagenomics/mgnify_genomes/human-gut/v2.0/species_catalogue/MGYG0000026/MGYG000002655/genome/MGYG000002655.fna	0.0952786	2	0.00426073	14	16	12	40215.5	61064	19367	Human-Gut	3	0.000134238	135.333	214	87	0	0	NA	5
./Cow-Rumen/ftp.ebi.ac.uk/pub/databases/metagenomics/mgnify_genomes/cow-rumen/v1.0/species_catalogue/MGYG0002934/MGYG000293460/genome/MGYG000293460.fna	0.095331	2	0.00426528	1918.5	2415	1422	341772	682121	1422	Cow-Rumen	0	1	0	0	NA	0	0	NA	2
./Human-Oral/ftp.ebi.ac.uk/pub/databases/metagenomics/mgnify_genomes/human-oral/v1.0/species_catalogue/MGYG0002986/MGYG000298619/genome/MGYG000298619.fna	0.0956874	2	0.00429621	12	19	5	209366	397056	21677	Human-Oral	3	0.000135932	128.333	190	13	0	0	NA	5
./Mouse-Gut/ftp.ebi.ac.uk/pub/databases/metagenomics/mgnify_genomes/mouse-gut/v1.0/species_catalogue/MGYG0003309/MGYG000330996/genome/MGYG000330996.fna	0.0960243	2	0.00432556	20722.5	41405	40	803990	1218069	389910	Mouse-Gut	0	1	0	0	NA	0	0	NA	2
./Marine/ftp.ebi.ac.uk/pub/databases/metagenomics/mgnify_genomes/marine/v1.0/species_catalogue/MGYG0002973/MGYG000297348/genome/MGYG000297348.fna	0.0964769	2	0.00436512	17	23	11	638460	808416	468505	Marine	0	1	0	0	NA	0	0	NA	2
./Human-Gut/pub/databases/metagenomics/mgnify_genomes/human-gut/v2.0/species_catalogue/MGYG0000026/MGYG000002656/genome/MGYG000002656.fna	0.0964896	2	0.00436624	2395	4762	28	340568	632346	48791	Human-Gut	1	0.0919807	6	6	6	0	0	NA	3
./Pig-Gut/ftp.ebi.ac.uk/pub/databases/metagenomics/mgnify_genomes/pig-gut/v1.0/species_catalogue/MGYG0003012/MGYG000301212/genome/MGYG000301212.fna	0.0971214	2	0.00442175	23	40	6	269754	450540	88967	Pig-Gut	0	1	0	0	NA	0	0	NA	2
./Human-Gut/pub/databases/metagenomics/mgnify_genomes/human-gut/v2.0/species_catalogue/MGYG0000032/MGYG000003292/genome/MGYG000003292.fna	0.0976418	2	0.00446773	2937	5259	615	397364	686455	108273	Human-Gut	2	0.00446773	58	66	50	0	0	NA	4
./Pig-Gut/ftp.ebi.ac.uk/pub/databases/metagenomics/mgnify_genomes/pig-gut/v1.0/species_catalogue/MGYG0003019/MGYG000301949/genome/MGYG000301949.fna	0.0977324	2	0.00447576	17	27	7	248460	329927	166993	Pig-Gut	1	0.0931085	34	34	34	0	0	NA	3
./Human-Gut/pub/databases/metagenomics/mgnify_genomes/human-gut/v2.0/species_catalogue/MGYG0000035/MGYG000003592/genome/MGYG000003592.fna	0.0977796	2	0.00447994	10	12	8	685058	1356007	14109	Human-Gut	1	0.0931512	20	20	20	0	0	NA	3
./Cow-Rumen/ftp.ebi.ac.uk/pub/databases/metagenomics/mgnify_genomes/cow-rumen/v1.0/species_catalogue/MGYG0002952/MGYG000295260/genome/MGYG000295260.fna	0.0981383	2	0.0045118	4389.5	4909	3870	330975	600949	61001	Cow-Rumen	0	1	0	0	NA	0	0	NA	2
./Human-Gut/pub/databases/metagenomics/mgnify_genomes/human-gut/v2.0/species_catalogue/MGYG0000028/MGYG000002891/genome/MGYG000002891.fna	0.0984228	2	0.00453714	19	36	2	599266	1135072	63460	Human-Gut	0	1	0	0	NA	0	0	NA	2
./Cow-Rumen/ftp.ebi.ac.uk/pub/databases/metagenomics/mgnify_genomes/cow-rumen/v1.0/species_catalogue/MGYG0002922/MGYG000292271/genome/MGYG000292271.fna	0.098842	2	0.00457461	1384.5	1482	1287	740359	963830	516888	Cow-Rumen	0	1	0	0	NA	0	0	NA	2
./Mouse-Gut/ftp.ebi.ac.uk/pub/databases/metagenomics/mgnify_genomes/mouse-gut/v1.0/species_catalogue/MGYG0003283/MGYG000328306/genome/MGYG000328306.fna	0.0993413	2	0.00461941	22	23	21	328360	465972	190749	Mouse-Gut	3	0.000151691	60	113	14	0	0	NA	5
./Marine/ftp.ebi.ac.uk/pub/databases/metagenomics/mgnify_genomes/marine/v1.0/species_catalogue/MGYG0002963/MGYG000296323/genome/MGYG000296323.fna	0.0998464	2	0.00466495	5	6	4	409808	682885	136732	Marine	2	0.00466495	232.5	259	206	0	0	NA	4
./Pig-Gut/ftp.ebi.ac.uk/pub/databases/metagenomics/mgnify_genomes/pig-gut/v1.0/species_catalogue/MGYG0003017/MGYG000301714/genome/MGYG000301714.fna	0.100425	2	0.0047174	130.5	222	39	234996	469771	222	Pig-Gut	1	0.0955474	102	102	102	0	0	NA	3
./Human-Gut/pub/databases/metagenomics/mgnify_genomes/human-gut/v2.0/species_catalogue/MGYG0000035/MGYG000003539/genome/MGYG000003539.fna	0.101218	2	0.00478964	6.5	7	6	757090	1510935	3245	Human-Gut	0	1	0	0	NA	0	0	NA	2
./Mouse-Gut/ftp.ebi.ac.uk/pub/databases/metagenomics/mgnify_genomes/mouse-gut/v1.0/species_catalogue/MGYG0004115/MGYG000411581/genome/MGYG000411581.fna	0.10174	2	0.00483753	5992.5	7896	4089	243796	308461	179130	Mouse-Gut	0	1	0	0	NA	0	0	NA	2
./Human-Gut/pub/databases/metagenomics/mgnify_genomes/human-gut/v2.0/species_catalogue/MGYG0000010/MGYG000001028/genome/MGYG000001028.fna	0.10269	2	0.0049252	9.5	13	6	755842	1090217	421466	Human-Gut	3	0.000167137	365.333	610	203	0	0	NA	5
./Chicken-Gut/ftp.ebi.ac.uk/pub/databases/metagenomics/mgnify_genomes/chicken-gut/v1.0/species_catalogue/MGYG0003078/MGYG000307833/genome/MGYG000307833.fna	0.10287	2	0.00494186	6824	9587	4061	628729	909380	348078	Chicken-Gut	0	1	0	0	NA	0	0	NA	2
./Human-Gut/pub/databases/metagenomics/mgnify_genomes/human-gut/v2.0/species_catalogue/MGYG0000040/MGYG000004040/genome/MGYG000004040.fna	0.103097	2	0.00496297	3715	7429	1	808989	1133798	484180	Human-Gut	0	1	0	0	NA	0	0	NA	2
./Mouse-Gut/ftp.ebi.ac.uk/pub/databases/metagenomics/mgnify_genomes/mouse-gut/v1.0/species_catalogue/MGYG0003271/MGYG000327169/genome/MGYG000327169.fna	0.103339	2	0.0049855	34	34	34	48798	85008	12588	Mouse-Gut	2	0.0049855	12.5	22	3	0	0	NA	4
./Human-Gut/pub/databases/metagenomics/mgnify_genomes/human-gut/v2.0/species_catalogue/MGYG0000029/MGYG000002975/genome/MGYG000002975.fna	0.104151	2	0.00506147	22.5	42	3	355276	605236	105316	Human-Gut	1	0.0989111	43	43	43	0	0	NA	3
./Human-Gut/pub/databases/metagenomics/mgnify_genomes/human-gut/v2.0/species_catalogue/MGYG0000020/MGYG000002093/genome/MGYG000002093.fna	0.104736	2	0.00511651	899.5	1783	16	151398	263738	39059	Human-Gut	2	0.00511651	240	326	154	0	0	NA	4
./Human-Gut/pub/databases/metagenomics/mgnify_genomes/human-gut/v2.0/species_catalogue/MGYG0000009/MGYG000000944/genome/MGYG000000944.fna	0.106391	2	0.00527372	61739.5	122140	1339	665144	1218292	111996	Human-Gut	0	1	0	0	NA	0	0	NA	2
./Human-Gut/pub/databases/metagenomics/mgnify_genomes/human-gut/v2.0/species_catalogue/MGYG0000037/MGYG000003795/genome/MGYG000003795.fna	0.106593	2	0.005293	8	14	2	748472	1138160	358785	Human-Gut	1	0.101108	20	20	20	0	0	NA	3
./Mouse-Gut/ftp.ebi.ac.uk/pub/databases/metagenomics/mgnify_genomes/mouse-gut/v1.0/species_catalogue/MGYG0003283/MGYG000328353/genome/MGYG000328353.fna	0.107217	2	0.00535293	25	31	19	150759	227133	74385	Mouse-Gut	4	5.05423e-06	67.5	78	51	0	0	NA	6
./Human-Gut/pub/databases/metagenomics/mgnify_genomes/human-gut/v2.0/species_catalogue/MGYG0000037/MGYG000003760/genome/MGYG000003760.fna	0.10749	2	0.00537929	13	13	13	70499	109429	31569	Human-Gut	0	1	0	0	NA	0	0	NA	2
./Human-Gut/pub/databases/metagenomics/mgnify_genomes/human-gut/v2.0/species_catalogue/MGYG0000026/MGYG000002635/genome/MGYG000002635.fna	0.108121	2	0.00544036	12.5	18	7	572550	998918	146182	Human-Gut	6	2.02264e-09	197.333	331	62	0	0	NA	8
./Human-Gut/pub/databases/metagenomics/mgnify_genomes/human-gut/v2.0/species_catalogue/MGYG0000037/MGYG000003746/genome/MGYG000003746.fna	0.108461	2	0.00547342	13	13	13	274933	332049	217817	Human-Gut	3	0.000196083	98.6667	143	64	0	0	NA	5
./Human-Gut/pub/databases/metagenomics/mgnify_genomes/human-gut/v2.0/species_catalogue/MGYG0000021/MGYG000002128/genome/MGYG000002128.fna	0.109211	2	0.00554657	162	289	35	481639	535183	428095	Human-Gut	1	0.103458	16	16	16	0	0	NA	3
./Cow-Rumen/ftp.ebi.ac.uk/pub/databases/metagenomics/mgnify_genomes/cow-rumen/v1.0/species_catalogue/MGYG0002914/MGYG000291497/genome/MGYG000291497.fna	0.109366	2	0.00556184	7302.5	13520	1085	405342	644982	165703	Cow-Rumen	1	0.103598	24	24	24	0	0	NA	3
./Human-Oral/ftp.ebi.ac.uk/pub/databases/metagenomics/mgnify_genomes/human-oral/v1.0/species_catalogue/MGYG0002989/MGYG000298927/genome/MGYG000298927.fna	0.109924	2	0.00561663	10.5	12	9	316254	399982	232527	Human-Oral	1	0.104098	326	326	326	0	0	NA	3
./Human-Gut/pub/databases/metagenomics/mgnify_genomes/human-gut/v2.0/species_catalogue/MGYG0000030/MGYG000003003/genome/MGYG000003003.fna	0.109952	2	0.0056194	30	41	19	209488	307674	111302	Human-Gut	5	1.22208e-07	53.6	71	34	0	0	NA	7
./Human-Gut/pub/databases/metagenomics/mgnify_genomes/human-gut/v2.0/species_catalogue/MGYG0000037/MGYG000003739/genome/MGYG000003739.fna	0.110546	2	0.00567799	13	14	12	151740	268539	34940	Human-Gut	2	0.00567799	56	76	36	0	0	NA	4
./Mouse-Gut/ftp.ebi.ac.uk/pub/databases/metagenomics/mgnify_genomes/mouse-gut/v1.0/species_catalogue/MGYG0004109/MGYG000410947/genome/MGYG000410947.fna	0.110811	2	0.00570428	213598	326562	100633	863772	1198423	529121	Mouse-Gut	0	1	0	0	NA	0	0	NA	2
./Human-Gut/pub/databases/metagenomics/mgnify_genomes/human-gut/v2.0/species_catalogue/MGYG0000029/MGYG000002957/genome/MGYG000002957.fna	0.111378	2	0.00576063	295	576	14	362948	602597	123298	Human-Gut	0	1	0	0	NA	0	0	NA	2
./Human-Gut/pub/databases/metagenomics/mgnify_genomes/human-gut/v2.0/species_catalogue/MGYG0000035/MGYG000003591/genome/MGYG000003591.fna	0.112052	2	0.005828	1055.5	2106	5	221418	263631	179204	Human-Gut	0	1	0	0	NA	0	0	NA	2
./Human-Gut/pub/databases/metagenomics/mgnify_genomes/human-gut/v2.0/species_catalogue/MGYG0000015/MGYG000001591/genome/MGYG000001591.fna	0.357485	3	0.00583773	34681.3	89839	2137	1450000	3916597	12306	Human-Gut	0	1	0	0	NA	0	0	NA	3
./Human-Gut/pub/databases/metagenomics/mgnify_genomes/human-gut/v2.0/species_catalogue/MGYG0000007/MGYG000000733/genome/MGYG000000733.fna	0.112808	2	0.00590396	13	18	8	235272	402683	67860	Human-Gut	1	0.106678	43	43	43	0	0	NA	3
./Human-Gut/pub/databases/metagenomics/mgnify_genomes/human-gut/v2.0/species_catalogue/MGYG0000031/MGYG000003191/genome/MGYG000003191.fna	0.112907	2	0.00591397	5.5	7	4	615584	904889	326279	Human-Gut	1	0.106767	51	51	51	0	0	NA	3
./Human-Gut/pub/databases/metagenomics/mgnify_genomes/human-gut/v2.0/species_catalogue/MGYG0000012/MGYG000001221/genome/MGYG000001221.fna	0.112934	2	0.00591667	2	2	2	499721	640755	358687	Human-Gut	0	1	0	0	NA	0	0	NA	2
./Human-Gut/pub/databases/metagenomics/mgnify_genomes/human-gut/v2.0/species_catalogue/MGYG0000033/MGYG000003368/genome/MGYG000003368.fna	0.11403	2	0.00602765	9.5	17	2	476560	541461	411659	Human-Gut	2	0.00602765	93	107	79	0	0	NA	4
./Human-Gut/pub/databases/metagenomics/mgnify_genomes/human-gut/v2.0/species_catalogue/MGYG0000021/MGYG000002129/genome/MGYG000002129.fna	0.114806	2	0.00610685	38.5	39	38	68656	79055	58257	Human-Gut	0	1	0	0	NA	0	0	NA	2
./Human-Gut/pub/databases/metagenomics/mgnify_genomes/human-gut/v2.0/species_catalogue/MGYG0000020/MGYG000002096/genome/MGYG000002096.fna	0.115036	2	0.00613048	39	39	39	170366	237994	102739	Human-Gut	5	1.52553e-07	125.6	231	2	0	0	NA	7
./Marine/ftp.ebi.ac.uk/pub/databases/metagenomics/mgnify_genomes/marine/v1.0/species_catalogue/MGYG0002972/MGYG000297208/genome/MGYG000297208.fna	0.115069	2	0.00613384	38	39	37	313318	431075	195562	Marine	1	0.108695	89	89	89	0	0	NA	3
./Human-Gut/pub/databases/metagenomics/mgnify_genomes/human-gut/v2.0/species_catalogue/MGYG0000046/MGYG000004670/genome/MGYG000004670.fna	0.115289	2	0.00615637	527	1053	1	678112	860392	495831	Human-Gut	0	1	0	0	NA	0	0	NA	2
./Cow-Rumen/ftp.ebi.ac.uk/pub/databases/metagenomics/mgnify_genomes/cow-rumen/v1.0/species_catalogue/MGYG0002943/MGYG000294361/genome/MGYG000294361.fna	0.11562	2	0.00619045	13611	22926	4296	270157	362409	177905	Cow-Rumen	0	1	0	0	NA	0	0	NA	2
./Cow-Rumen/ftp.ebi.ac.uk/pub/databases/metagenomics/mgnify_genomes/cow-rumen/v1.0/species_catalogue/MGYG0002922/MGYG000292226/genome/MGYG000292226.fna	0.115927	2	0.00622207	15722.5	25285	6160	923598	1489345	357852	Cow-Rumen	0	1	0	0	NA	0	0	NA	2
./Non-Model-Fish-Gut/ftp.ebi.ac.uk/pub/databases/metagenomics/mgnify_genomes/non-model-fish-gut/v2.0/species_catalogue/MGYG0002996/MGYG000299601/genome/MGYG000299601.fna	0.117042	2	0.00633775	9328.5	11668	6989	776526	860166	692886	Non-Model-Fish-Gut	0	1	0	0	NA	0	0	NA	2
./Pig-Gut/ftp.ebi.ac.uk/pub/databases/metagenomics/mgnify_genomes/pig-gut/v1.0/species_catalogue/MGYG0003024/MGYG000302424/genome/MGYG000302424.fna	0.117314	2	0.00636601	40	41	39	99816	120595	79037	Pig-Gut	0	1	0	0	NA	0	0	NA	2
./Cow-Rumen/ftp.ebi.ac.uk/pub/databases/metagenomics/mgnify_genomes/cow-rumen/v1.0/species_catalogue/MGYG0002937/MGYG000293709/genome/MGYG000293709.fna	0.117893	2	0.00642658	2079	3129	1029	702423	1378711	26135	Cow-Rumen	1	0.111209	46	46	46	0	0	NA	3
./Human-Gut/pub/databases/metagenomics/mgnify_genomes/human-gut/v2.0/species_catalogue/MGYG0000036/MGYG000003637/genome/MGYG000003637.fna	0.118115	2	0.00644988	17.5	30	5	902408	1695039	109777	Human-Gut	0	1	0	0	NA	0	0	NA	2
./Human-Gut/pub/databases/metagenomics/mgnify_genomes/human-gut/v2.0/species_catalogue/MGYG0000021/MGYG000002121/genome/MGYG000002121.fna	0.11832	2	0.0064714	33	33	33	318438	391384	245491	Human-Gut	2	0.0064714	42.5	53	32	0	0	NA	4
./Human-Gut/pub/databases/metagenomics/mgnify_genomes/human-gut/v2.0/species_catalogue/MGYG0000003/MGYG000000324/genome/MGYG000000324.fna	0.118533	2	0.00649383	1.5	2	1	359112	628201	90022	Human-Gut	0	1	0	0	NA	0	0	NA	2
./Human-Gut/pub/databases/metagenomics/mgnify_genomes/human-gut/v2.0/species_catalogue/MGYG0000033/MGYG000003391/genome/MGYG000003391.fna	0.119165	2	0.0065605	7	9	5	255883	444112	67654	Human-Gut	2	0.0065605	15	26	4	0	0	NA	4
./Pig-Gut/ftp.ebi.ac.uk/pub/databases/metagenomics/mgnify_genomes/pig-gut/v1.0/species_catalogue/MGYG0003022/MGYG000302260/genome/MGYG000302260.fna	0.119692	2	0.0066164	4542	9066	18	946672	1364104	529239	Pig-Gut	1	0.112807	50	50	50	0	0	NA	3
./Human-Gut/pub/databases/metagenomics/mgnify_genomes/human-gut/v2.0/species_catalogue/MGYG0000005/MGYG000000545/genome/MGYG000000545.fna	0.120456	2	0.00669775	88774.5	120540	57009	923780	1399060	448500	Human-Gut	0	1	0	0	NA	0	0	NA	2
./Non-Model-Fish-Gut/ftp.ebi.ac.uk/pub/databases/metagenomics/mgnify_genomes/non-model-fish-gut/v2.0/species_catalogue/MGYG0002995/MGYG000299521/genome/MGYG000299521.fna	0.120708	2	0.00672471	24.5	33	16	526531	701536	351526	Non-Model-Fish-Gut	0	1	0	0	NA	0	0	NA	2
./Pig-Gut/ftp.ebi.ac.uk/pub/databases/metagenomics/mgnify_genomes/pig-gut/v1.0/species_catalogue/MGYG0003023/MGYG000302388/genome/MGYG000302388.fna	0.121138	2	0.00677074	71	107	35	508226	593265	423188	Pig-Gut	3	0.000270616	250.333	345	122	0	0	NA	5
./Chicken-Gut/ftp.ebi.ac.uk/pub/databases/metagenomics/mgnify_genomes/chicken-gut/v1.0/species_catalogue/MGYG0003209/MGYG000320945/genome/MGYG000320945.fna	0.121235	2	0.00678118	6850.5	9104	4597	586918	633999	539838	Chicken-Gut	1	0.114175	107	107	107	0	0	NA	3
./Human-Gut/pub/databases/metagenomics/mgnify_genomes/human-gut/v2.0/species_catalogue/MGYG0000028/MGYG000002899/genome/MGYG000002899.fna	0.121241	2	0.00678177	5341	10654	28	418214	715035	121393	Human-Gut	0	1	0	0	NA	0	0	NA	2
./Human-Gut/pub/databases/metagenomics/mgnify_genomes/human-gut/v2.0/species_catalogue/MGYG0000037/MGYG000003798/genome/MGYG000003798.fna	0.121614	2	0.00682185	1662.5	3313	12	79941	86567	73315	Human-Gut	0	1	0	0	NA	0	0	NA	2
./Mouse-Gut/ftp.ebi.ac.uk/pub/databases/metagenomics/mgnify_genomes/mouse-gut/v1.0/species_catalogue/MGYG0003305/MGYG000330570/genome/MGYG000330570.fna	0.121648	2	0.00682555	52.5	92	13	700598	1100321	300876	Mouse-Gut	2	0.00682555	152	211	93	0	0	NA	4
./Human-Gut/pub/databases/metagenomics/mgnify_genomes/human-gut/v2.0/species_catalogue/MGYG0000045/MGYG000004584/genome/MGYG000004584.fna	0.121703	2	0.00683144	1	1	1	803650	1488499	118800	Human-Gut	1	0.114588	34	34	34	0	0	NA	3
./Mouse-Gut/ftp.ebi.ac.uk/pub/databases/metagenomics/mgnify_genomes/mouse-gut/v1.0/species_catalogue/MGYG0003225/MGYG000322554/genome/MGYG000322554.fna	0.122291	2	0.00689502	131	224	38	131	224	38	Mouse-Gut	1	0.115109	25	25	25	235	235	235	3
./Human-Gut/pub/databases/metagenomics/mgnify_genomes/human-gut/v2.0/species_catalogue/MGYG0000012/MGYG000001204/genome/MGYG000001204.fna	0.122291	2	0.00689502	3440.5	6878	3	234106	398805	69408	Human-Gut	0	1	0	0	NA	0	0	NA	2
./Cow-Rumen/ftp.ebi.ac.uk/pub/databases/metagenomics/mgnify_genomes/cow-rumen/v1.0/species_catalogue/MGYG0002900/MGYG000290025/genome/MGYG000290025.fna	0.122402	2	0.006907	2103	3405	801	661698	1091366	232031	Cow-Rumen	0	1	0	0	NA	0	0	NA	2
./Cow-Rumen/ftp.ebi.ac.uk/pub/databases/metagenomics/mgnify_genomes/cow-rumen/v1.0/species_catalogue/MGYG0002936/MGYG000293609/genome/MGYG000293609.fna	0.122997	2	0.0069716	6634	11139	2129	475474	751316	199632	Cow-Rumen	0	1	0	0	NA	0	0	NA	2
./Cow-Rumen/ftp.ebi.ac.uk/pub/databases/metagenomics/mgnify_genomes/cow-rumen/v1.0/species_catalogue/MGYG0002940/MGYG000294053/genome/MGYG000294053.fna	0.12305	2	0.00697731	2194	3139	1249	35269.5	46296	24243	Cow-Rumen	1	0.11578	19	19	19	13	13	13	3
./Mouse-Gut/ftp.ebi.ac.uk/pub/databases/metagenomics/mgnify_genomes/mouse-gut/v1.0/species_catalogue/MGYG0003226/MGYG000322680/genome/MGYG000322680.fna	0.123059	2	0.00697837	788	1075	501	24.5	29	20	Mouse-Gut	3	0.000283292	59.3333	67	53	41.5	43	40	5
./Human-Gut/pub/databases/metagenomics/mgnify_genomes/human-gut/v2.0/species_catalogue/MGYG0000037/MGYG000003786/genome/MGYG000003786.fna	0.123132	2	0.00698626	2242	4425	59	279789	351432	208146	Human-Gut	2	0.00698626	7.5	13	2	0	0	NA	4
./Chicken-Gut/ftp.ebi.ac.uk/pub/databases/metagenomics/mgnify_genomes/chicken-gut/v1.0/species_catalogue/MGYG0003133/MGYG000313369/genome/MGYG000313369.fna	0.12324	2	0.006998	12577	20767	4387	619539	819743	419335	Chicken-Gut	1	0.115948	5	5	5	0	0	NA	3
./Human-Gut/pub/databases/metagenomics/mgnify_genomes/human-gut/v2.0/species_catalogue/MGYG0000037/MGYG000003723/genome/MGYG000003723.fna	0.123461	2	0.00702208	11.5	12	11	298509	439902	157116	Human-Gut	0	1	0	0	NA	0	0	NA	2
./Cow-Rumen/ftp.ebi.ac.uk/pub/databases/metagenomics/mgnify_genomes/cow-rumen/v1.0/species_catalogue/MGYG0002913/MGYG000291358/genome/MGYG000291358.fna	0.124388	2	0.00712361	2961	5459	463	34568.5	36743	32394	Cow-Rumen	0	1	0	0	NA	0	0	NA	2
./Human-Gut/pub/databases/metagenomics/mgnify_genomes/human-gut/v2.0/species_catalogue/MGYG0000015/MGYG000001524/genome/MGYG000001524.fna	0.124614	2	0.00714843	643306	1257888	28725	643306	1257888	28725	Human-Gut	0	1	0	0	NA	0	0	NA	2
./Human-Gut/pub/databases/metagenomics/mgnify_genomes/human-gut/v2.0/species_catalogue/MGYG0000026/MGYG000002659/genome/MGYG000002659.fna	0.12462	2	0.00714916	33	36	30	518097	880511	155683	Human-Gut	1	0.117168	52	52	52	0	0	NA	3
./Cow-Rumen/ftp.ebi.ac.uk/pub/databases/metagenomics/mgnify_genomes/cow-rumen/v1.0/species_catalogue/MGYG0002914/MGYG000291487/genome/MGYG000291487.fna	0.125087	2	0.00720059	2061	2818	1304	3282	5124	1440	Cow-Rumen	2	0.00720059	166	319	13	83	83	83	4
./Human-Gut/pub/databases/metagenomics/mgnify_genomes/human-gut/v2.0/species_catalogue/MGYG0000026/MGYG000002664/genome/MGYG000002664.fna	0.125287	2	0.00722272	18792.5	37566	19	887815	1775611	19	Human-Gut	2	0.00722272	62.5	69	56	0	0	NA	4
./Human-Gut/pub/databases/metagenomics/mgnify_genomes/human-gut/v2.0/species_catalogue/MGYG0000027/MGYG000002775/genome/MGYG000002775.fna	0.12611	2	0.00731386	18.5	19	18	234662	365603	103721	Human-Gut	0	1	0	0	NA	0	0	NA	2
./Human-Gut/pub/databases/metagenomics/mgnify_genomes/human-gut/v2.0/species_catalogue/MGYG0000011/MGYG000001169/genome/MGYG000001169.fna	0.126424	2	0.00734881	2.5	3	2	916916	1464994	368839	Human-Gut	0	1	0	0	NA	0	0	NA	2
./Human-Gut/pub/databases/metagenomics/mgnify_genomes/human-gut/v2.0/species_catalogue/MGYG0000013/MGYG000001339/genome/MGYG000001339.fna	0.126591	2	0.00736742	344594	436524	252663	354908	457154	252663	Human-Gut	1	0.118906	2	2	2	0	0	NA	3
./Human-Gut/pub/databases/metagenomics/mgnify_genomes/human-gut/v2.0/species_catalogue/MGYG0000032/MGYG000003294/genome/MGYG000003294.fna	0.127206	2	0.00743617	18.5	20	17	450875	581925	319825	Human-Gut	0	1	0	0	NA	0	0	NA	2
./Human-Gut/pub/databases/metagenomics/mgnify_genomes/human-gut/v2.0/species_catalogue/MGYG0000016/MGYG000001651/genome/MGYG000001651.fna	0.127375	2	0.00745515	19	25	13	61552	98777	24327	Human-Gut	5	2.51311e-07	29.8	47	19	0	0	NA	7
./Cow-Rumen/ftp.ebi.ac.uk/pub/databases/metagenomics/mgnify_genomes/cow-rumen/v1.0/species_catalogue/MGYG0002918/MGYG000291849/genome/MGYG000291849.fna	0.127706	2	0.00749233	66409	97030	35788	969280	1099334	839226	Cow-Rumen	0	1	0	0	NA	0	0	NA	2
./Mouse-Gut/ftp.ebi.ac.uk/pub/databases/metagenomics/mgnify_genomes/mouse-gut/v1.0/species_catalogue/MGYG0003306/MGYG000330611/genome/MGYG000330611.fna	0.127766	2	0.00749911	40	42	38	310057	381202	238912	Mouse-Gut	2	0.00749911	102.5	112	93	0	0	NA	4
./Pig-Gut/ftp.ebi.ac.uk/pub/databases/metagenomics/mgnify_genomes/pig-gut/v1.0/species_catalogue/MGYG0003020/MGYG000302073/genome/MGYG000302073.fna	0.128012	2	0.00752671	31.5	41	22	96781.5	184421	9142	Pig-Gut	0	1	0	0	NA	0	0	NA	2
./Marine/ftp.ebi.ac.uk/pub/databases/metagenomics/mgnify_genomes/marine/v1.0/species_catalogue/MGYG0002970/MGYG000297094/genome/MGYG000297094.fna	0.12834	2	0.00756372	18725.5	22875	14576	714757	1295286	134228	Marine	0	1	0	0	NA	0	0	NA	2
./Human-Gut/pub/databases/metagenomics/mgnify_genomes/human-gut/v2.0/species_catalogue/MGYG0000027/MGYG000002782/genome/MGYG000002782.fna	0.128459	2	0.00757718	7.5	14	1	179128	209766	148489	Human-Gut	3	0.00032095	10	24	2	0	0	NA	5
./Mouse-Gut/ftp.ebi.ac.uk/pub/databases/metagenomics/mgnify_genomes/mouse-gut/v1.0/species_catalogue/MGYG0003226/MGYG000322666/genome/MGYG000322666.fna	0.12903	2	0.00764179	40862	80845	879	384356	767832	879	Mouse-Gut	1	0.121052	2	2	2	0	0	NA	3
./Non-Model-Fish-Gut/ftp.ebi.ac.uk/pub/databases/metagenomics/mgnify_genomes/non-model-fish-gut/v2.0/species_catalogue/MGYG0002995/MGYG000299571/genome/MGYG000299571.fna	0.129044	2	0.00764334	36.5	37	36	95138	154096	36180	Non-Model-Fish-Gut	1	0.121064	129	129	129	0	0	NA	3
./Cow-Rumen/ftp.ebi.ac.uk/pub/databases/metagenomics/mgnify_genomes/cow-rumen/v1.0/species_catalogue/MGYG0002905/MGYG000290531/genome/MGYG000290531.fna	0.129439	2	0.00768822	47760.5	76586	18935	268932	308950	228914	Cow-Rumen	0	1	0	0	NA	0	0	NA	2
./Human-Oral/ftp.ebi.ac.uk/pub/databases/metagenomics/mgnify_genomes/human-oral/v1.0/species_catalogue/MGYG0002983/MGYG000298377/genome/MGYG000298377.fna	0.129957	2	0.00774729	55	104	6	684994	1161925	208064	Human-Oral	2	0.00774729	63	65	61	0	0	NA	4
./Mouse-Gut/ftp.ebi.ac.uk/pub/databases/metagenomics/mgnify_genomes/mouse-gut/v1.0/species_catalogue/MGYG0003231/MGYG000323183/genome/MGYG000323183.fna	0.130086	2	0.00776194	23945	36035	11855	1030000	1226160	838593	Mouse-Gut	0	1	0	0	NA	0	0	NA	2
./Pig-Gut/ftp.ebi.ac.uk/pub/databases/metagenomics/mgnify_genomes/pig-gut/v1.0/species_catalogue/MGYG0003018/MGYG000301828/genome/MGYG000301828.fna	0.13054	2	0.00781395	9042.5	14613	3472	550195	1034522	65868	Pig-Gut	0	1	0	0	NA	0	0	NA	2
./Human-Gut/pub/databases/metagenomics/mgnify_genomes/human-gut/v2.0/species_catalogue/MGYG0000035/MGYG000003583/genome/MGYG000003583.fna	0.13057	2	0.00781737	10.5	14	7	919262	1251619	586905	Human-Gut	1	0.122405	69	69	69	0	0	NA	3
./Mouse-Gut/ftp.ebi.ac.uk/pub/databases/metagenomics/mgnify_genomes/mouse-gut/v1.0/species_catalogue/MGYG0003225/MGYG000322589/genome/MGYG000322589.fna	0.130808	2	0.00784463	14967	24495	5439	14.5	15	14	Mouse-Gut	1	0.122614	191	191	191	220	220	220	3
./Human-Gut/pub/databases/metagenomics/mgnify_genomes/human-gut/v2.0/species_catalogue/MGYG0000048/MGYG000004833/genome/MGYG000004833.fna	0.131054	2	0.00787292	13	14	12	1040000	1425620	654697	Human-Gut	0	1	0	0	NA	0	0	NA	2
./Pig-Gut/ftp.ebi.ac.uk/pub/databases/metagenomics/mgnify_genomes/pig-gut/v1.0/species_catalogue/MGYG0003017/MGYG000301721/genome/MGYG000301721.fna	0.131247	2	0.00789506	5039	10065	13	604512	963368	245656	Pig-Gut	2	0.00789506	107	145	69	0	0	NA	4
./Mouse-Gut/ftp.ebi.ac.uk/pub/databases/metagenomics/mgnify_genomes/mouse-gut/v1.0/species_catalogue/MGYG0003311/MGYG000331133/genome/MGYG000331133.fna	0.131527	2	0.00792738	23.5	28	19	770091	1269316	270866	Mouse-Gut	0	1	0	0	NA	0	0	NA	2
./Mouse-Gut/ftp.ebi.ac.uk/pub/databases/metagenomics/mgnify_genomes/mouse-gut/v1.0/species_catalogue/MGYG0003306/MGYG000330653/genome/MGYG000330653.fna	0.131911	2	0.00797173	34	39	29	613836	1176509	51164	Mouse-Gut	2	0.00797173	96.5	131	62	0	0	NA	4
./Human-Gut/pub/databases/metagenomics/mgnify_genomes/human-gut/v2.0/species_catalogue/MGYG0000032/MGYG000003202/genome/MGYG000003202.fna	0.132142	2	0.00799844	4.5	8	1	792470	1121713	463227	Human-Gut	0	1	0	0	NA	0	0	NA	2
./Cow-Rumen/ftp.ebi.ac.uk/pub/databases/metagenomics/mgnify_genomes/cow-rumen/v1.0/species_catalogue/MGYG0002950/MGYG000295083/genome/MGYG000295083.fna	0.134268	2	0.00824633	65569.5	97257	33882	485491	632699	338283	Cow-Rumen	0	1	0	0	NA	0	0	NA	2
./Pig-Gut/ftp.ebi.ac.uk/pub/databases/metagenomics/mgnify_genomes/pig-gut/v1.0/species_catalogue/MGYG0003019/MGYG000301969/genome/MGYG000301969.fna	0.134948	2	0.00832628	4988	9948	28	292496	575044	9948	Pig-Gut	3	0.000370288	42.3333	61	23	0	0	NA	5
./Marine/ftp.ebi.ac.uk/pub/databases/metagenomics/mgnify_genomes/marine/v1.0/species_catalogue/MGYG0002974/MGYG000297456/genome/MGYG000297456.fna	0.135287	2	0.00836629	41.5	44	39	611246	651854	570639	Marine	0	1	0	0	NA	0	0	NA	2
./Human-Gut/pub/databases/metagenomics/mgnify_genomes/human-gut/v2.0/species_catalogue/MGYG0000042/MGYG000004275/genome/MGYG000004275.fna	0.13569	2	0.00841403	2	2	2	187906	298243	77570	Human-Gut	1	0.126887	272	272	272	0	0	NA	3
./Human-Oral/ftp.ebi.ac.uk/pub/databases/metagenomics/mgnify_genomes/human-oral/v1.0/species_catalogue/MGYG0002991/MGYG000299173/genome/MGYG000299173.fna	0.135846	2	0.00843247	24	37	11	253823	485587	22059	Human-Oral	1	0.127023	54	54	54	0	0	NA	3
./Cow-Rumen/ftp.ebi.ac.uk/pub/databases/metagenomics/mgnify_genomes/cow-rumen/v1.0/species_catalogue/MGYG0002909/MGYG000290947/genome/MGYG000290947.fna	0.136016	2	0.00845268	2105.5	2972	1239	711253	920523	501983	Cow-Rumen	0	1	0	0	NA	0	0	NA	2
./Human-Gut/pub/databases/metagenomics/mgnify_genomes/human-gut/v2.0/species_catalogue/MGYG0000026/MGYG000002658/genome/MGYG000002658.fna	0.136162	2	0.00846996	9.5	16	3	527282	935897	118668	Human-Gut	2	0.00846997	124	191	57	0	0	NA	4
./Chicken-Gut/ftp.ebi.ac.uk/pub/databases/metagenomics/mgnify_genomes/chicken-gut/v1.0/species_catalogue/MGYG0003141/MGYG000314171/genome/MGYG000314171.fna	0.136167	2	0.00847056	77238	102106	52370	1140000	1376461	906182	Chicken-Gut	0	1	0	0	NA	0	0	NA	2
./Cow-Rumen/ftp.ebi.ac.uk/pub/databases/metagenomics/mgnify_genomes/cow-rumen/v1.0/species_catalogue/MGYG0002914/MGYG000291422/genome/MGYG000291422.fna	0.136238	2	0.008479	50175	69892	30458	60214	77800	42628	Cow-Rumen	3	0.000380643	23	35	10	50	86	5	5
./Mouse-Gut/ftp.ebi.ac.uk/pub/databases/metagenomics/mgnify_genomes/mouse-gut/v1.0/species_catalogue/MGYG0003307/MGYG000330718/genome/MGYG000330718.fna	0.136465	2	0.00850605	350	652	48	417343	707774	126912	Mouse-Gut	0	1	0	0	NA	0	0	NA	2
./Mouse-Gut/ftp.ebi.ac.uk/pub/databases/metagenomics/mgnify_genomes/mouse-gut/v1.0/species_catalogue/MGYG0003292/MGYG000329219/genome/MGYG000329219.fna	0.136674	2	0.00853091	37.5	39	36	720258	1367955	72561	Mouse-Gut	0	1	0	0	NA	0	0	NA	2
./Human-Gut/pub/databases/metagenomics/mgnify_genomes/human-gut/v2.0/species_catalogue/MGYG0000011/MGYG000001187/genome/MGYG000001187.fna	0.136811	2	0.0085473	1661.5	2581	742	135096	239744	30448	Human-Gut	1	0.127865	10	10	10	0	0	NA	3
./Marine/ftp.ebi.ac.uk/pub/databases/metagenomics/mgnify_genomes/marine/v1.0/species_catalogue/MGYG0002964/MGYG000296495/genome/MGYG000296495.fna	0.137204	2	0.0085942	28	42	14	667376	1322087	12665	Marine	3	0.000388517	69	163	7	0	0	NA	5
./Chicken-Gut/ftp.ebi.ac.uk/pub/databases/metagenomics/mgnify_genomes/chicken-gut/v1.0/species_catalogue/MGYG0003078/MGYG000307883/genome/MGYG000307883.fna	0.137627	2	0.00864485	9390.5	13208	5573	971104	1036054	906155	Chicken-Gut	0	1	0	0	NA	0	0	NA	2
./Human-Gut/pub/databases/metagenomics/mgnify_genomes/human-gut/v2.0/species_catalogue/MGYG0000035/MGYG000003597/genome/MGYG000003597.fna	0.137819	2	0.00866793	16	18	14	1114450	1870612	358288	Human-Gut	4	1.34664e-05	72.5	96	49	0	0	NA	6
./Human-Gut/pub/databases/metagenomics/mgnify_genomes/human-gut/v2.0/species_catalogue/MGYG0000040/MGYG000004034/genome/MGYG000004034.fna	0.1386	2	0.00876201	2	2	2	702914	1312350	93477	Human-Gut	0	1	0	0	NA	0	0	NA	2
./Mouse-Gut/ftp.ebi.ac.uk/pub/databases/metagenomics/mgnify_genomes/mouse-gut/v1.0/species_catalogue/MGYG0003255/MGYG000325532/genome/MGYG000325532.fna	0.138822	2	0.00878875	5472.5	9210	1735	817828	1424764	210891	Mouse-Gut	1	0.129617	144	144	144	0	0	NA	3
./Pig-Gut/ftp.ebi.ac.uk/pub/databases/metagenomics/mgnify_genomes/pig-gut/v1.0/species_catalogue/MGYG0003023/MGYG000302350/genome/MGYG000302350.fna	0.138909	2	0.00879928	20	37	3	651606	1303175	37	Pig-Gut	2	0.00879928	136	165	107	0	0	NA	4
./Pig-Gut/ftp.ebi.ac.uk/pub/databases/metagenomics/mgnify_genomes/pig-gut/v1.0/species_catalogue/MGYG0003035/MGYG000303588/genome/MGYG000303588.fna	0.139231	2	0.00883824	10855	18917	2793	1140000	1439222	847245	Pig-Gut	1	0.129973	105	105	105	0	0	NA	3
./Human-Gut/pub/databases/metagenomics/mgnify_genomes/human-gut/v2.0/species_catalogue/MGYG0000012/MGYG000001250/genome/MGYG000001250.fna	0.139464	2	0.00886644	9418	11177	7659	427902	558826	296979	Human-Gut	2	0.00886644	72	73	71	0	0	NA	4
./Pig-Gut/ftp.ebi.ac.uk/pub/databases/metagenomics/mgnify_genomes/pig-gut/v1.0/species_catalogue/MGYG0003012/MGYG000301211/genome/MGYG000301211.fna	0.139648	2	0.00888882	42	43	41	499404	951771	47036	Pig-Gut	0	1	0	0	NA	0	0	NA	2
./Human-Gut/pub/databases/metagenomics/mgnify_genomes/human-gut/v2.0/species_catalogue/MGYG0000031/MGYG000003199/genome/MGYG000003199.fna	0.139719	2	0.00889739	21	31	11	368068	542056	194079	Human-Gut	0	1	0	0	NA	0	0	NA	2
./Pig-Gut/ftp.ebi.ac.uk/pub/databases/metagenomics/mgnify_genomes/pig-gut/v1.0/species_catalogue/MGYG0003020/MGYG000302048/genome/MGYG000302048.fna	0.140755	2	0.00902375	24	26	22	283782	516175	51389	Pig-Gut	2	0.00902375	54.5	87	22	0	0	NA	4
./Human-Oral/ftp.ebi.ac.uk/pub/databases/metagenomics/mgnify_genomes/human-oral/v1.0/species_catalogue/MGYG0002981/MGYG000298178/genome/MGYG000298178.fna	0.140764	2	0.00902487	12331.5	19763	4900	1130000	2033262	234149	Human-Oral	0	1	0	0	NA	0	0	NA	2
./Human-Gut/pub/databases/metagenomics/mgnify_genomes/human-gut/v2.0/species_catalogue/MGYG0000038/MGYG000003808/genome/MGYG000003808.fna	0.141047	2	0.00905942	18	23	13	39573	72035	7111	Human-Gut	2	0.00905942	157.5	162	153	0	0	NA	4
./Mouse-Gut/ftp.ebi.ac.uk/pub/databases/metagenomics/mgnify_genomes/mouse-gut/v1.0/species_catalogue/MGYG0003311/MGYG000331164/genome/MGYG000331164.fna	0.141254	2	0.00908482	55.5	73	38	952764	1818127	87400	Mouse-Gut	7	1.96766e-10	116.429	205	18	0	0	NA	9
./Human-Gut/pub/databases/metagenomics/mgnify_genomes/human-gut/v2.0/species_catalogue/MGYG0000047/MGYG000004759/genome/MGYG000004759.fna	0.14192	2	0.00916671	2092.5	4182	3	428152	556484	299821	Human-Gut	1	0.13231	138	138	138	0	0	NA	3
./Mouse-Gut/ftp.ebi.ac.uk/pub/databases/metagenomics/mgnify_genomes/mouse-gut/v1.0/species_catalogue/MGYG0004028/MGYG000402809/genome/MGYG000402809.fna	0.142549	2	0.00924421	4682.5	5910	3455	962499	1746418	178580	Mouse-Gut	0	1	0	0	NA	0	0	NA	2
./Pig-Gut/ftp.ebi.ac.uk/pub/databases/metagenomics/mgnify_genomes/pig-gut/v1.0/species_catalogue/MGYG0003003/MGYG000300306/genome/MGYG000300306.fna	0.142623	2	0.00925338	91723	137734	45712	1200000	1989424	402581	Pig-Gut	0	1	0	0	NA	0	0	NA	2
./Human-Gut/pub/databases/metagenomics/mgnify_genomes/human-gut/v2.0/species_catalogue/MGYG0000034/MGYG000003401/genome/MGYG000003401.fna	0.14271	2	0.00926417	9.5	10	9	1121590	1440132	803048	Human-Gut	1	0.132994	20	20	20	0	0	NA	3
./Cow-Rumen/ftp.ebi.ac.uk/pub/databases/metagenomics/mgnify_genomes/cow-rumen/v1.0/species_catalogue/MGYG0002930/MGYG000293059/genome/MGYG000293059.fna	0.142723	2	0.00926575	4053	7613	493	571812	1049591	94033	Cow-Rumen	1	0.133006	215	215	215	0	0	NA	3
./Marine/ftp.ebi.ac.uk/pub/databases/metagenomics/mgnify_genomes/marine/v1.0/species_catalogue/MGYG0002969/MGYG000296982/genome/MGYG000296982.fna	0.143178	2	0.00932212	1015	1988	42	67784.5	95493	40076	Marine	1	0.1334	395	395	395	0	0	NA	3
./Human-Gut/pub/databases/metagenomics/mgnify_genomes/human-gut/v2.0/species_catalogue/MGYG0000005/MGYG000000510/genome/MGYG000000510.fna	0.143894	2	0.00941115	9.5	11	8	856508	1648022	64993	Human-Gut	4	1.59251e-05	40.25	80	19	0	0	NA	6
./Mouse-Gut/ftp.ebi.ac.uk/pub/databases/metagenomics/mgnify_genomes/mouse-gut/v1.0/species_catalogue/MGYG0003290/MGYG000329032/genome/MGYG000329032.fna	0.144223	2	0.00945228	36.5	37	36	717596	1068648	366543	Mouse-Gut	0	1	0	0	NA	0	0	NA	2
./Human-Gut/pub/databases/metagenomics/mgnify_genomes/human-gut/v2.0/species_catalogue/MGYG0000033/MGYG000003303/genome/MGYG000003303.fna	0.144681	2	0.00950949	687.5	1317	58	1190000	1789579	597110	Human-Gut	0	1	0	0	NA	0	0	NA	2
./Cow-Rumen/ftp.ebi.ac.uk/pub/databases/metagenomics/mgnify_genomes/cow-rumen/v1.0/species_catalogue/MGYG0002919/MGYG000291909/genome/MGYG000291909.fna	0.144799	2	0.00952434	29321.5	39858	18785	533425	979969	86881	Cow-Rumen	1	0.134804	4	4	4	0	0	NA	3
./Mouse-Gut/ftp.ebi.ac.uk/pub/databases/metagenomics/mgnify_genomes/mouse-gut/v1.0/species_catalogue/MGYG0003306/MGYG000330621/genome/MGYG000330621.fna	0.145402	2	0.00959997	12.5	24	1	192962	282688	103237	Mouse-Gut	1	0.135325	79	79	79	0	0	NA	3
./Pig-Gut/ftp.ebi.ac.uk/pub/databases/metagenomics/mgnify_genomes/pig-gut/v1.0/species_catalogue/MGYG0003019/MGYG000301953/genome/MGYG000301953.fna	0.146644	2	0.0097567	30	32	28	432515	629651	235379	Pig-Gut	4	1.71405e-05	100	222	34	0	0	NA	6
./Cow-Rumen/ftp.ebi.ac.uk/pub/databases/metagenomics/mgnify_genomes/cow-rumen/v1.0/species_catalogue/MGYG0002929/MGYG000292996/genome/MGYG000292996.fna	0.146911	2	0.00979053	2444	3580	1308	1073450	1859820	287080	Cow-Rumen	0	1	0	0	NA	0	0	NA	2
./Chicken-Gut/ftp.ebi.ac.uk/pub/databases/metagenomics/mgnify_genomes/chicken-gut/v1.0/species_catalogue/MGYG0003080/MGYG000308097/genome/MGYG000308097.fna	0.146938	2	0.00979395	32751	45819	19683	721580	1397342	45819	Chicken-Gut	0	1	0	0	NA	0	0	NA	2
./Mouse-Gut/ftp.ebi.ac.uk/pub/databases/metagenomics/mgnify_genomes/mouse-gut/v1.0/species_catalogue/MGYG0003307/MGYG000330733/genome/MGYG000330733.fna	0.147097	2	0.00981408	1666	3322	10	808872	1265113	352631	Mouse-Gut	0	1	0	0	NA	0	0	NA	2
./Mouse-Gut/ftp.ebi.ac.uk/pub/databases/metagenomics/mgnify_genomes/mouse-gut/v1.0/species_catalogue/MGYG0004103/MGYG000410332/genome/MGYG000410332.fna	0.147464	2	0.00986082	1440.5	2731	150	1010000	1985454	30391	Mouse-Gut	0	1	0	0	NA	0	0	NA	2
./Human-Gut/pub/databases/metagenomics/mgnify_genomes/human-gut/v2.0/species_catalogue/MGYG0000029/MGYG000002954/genome/MGYG000002954.fna	0.147474	2	0.00986206	60	60	60	395785	791510	60	Human-Gut	0	1	0	0	NA	0	0	NA	2
./Human-Gut/pub/databases/metagenomics/mgnify_genomes/human-gut/v2.0/species_catalogue/MGYG0000004/MGYG000000444/genome/MGYG000000444.fna	0.151085	2	0.0103263	14271	25073	3469	838492	1274759	402226	Human-Gut	0	1	0	0	NA	0	0	NA	2
./Cow-Rumen/ftp.ebi.ac.uk/pub/databases/metagenomics/mgnify_genomes/cow-rumen/v1.0/species_catalogue/MGYG0002926/MGYG000292695/genome/MGYG000292695.fna	0.151196	2	0.0103407	98451	175830	21072	1220000	2265187	183822	Cow-Rumen	0	1	0	0	NA	0	0	NA	2
./Human-Gut/pub/databases/metagenomics/mgnify_genomes/human-gut/v2.0/species_catalogue/MGYG0000038/MGYG000003806/genome/MGYG000003806.fna	0.151274	2	0.0103509	12.5	13	12	569821	1106706	32936	Human-Gut	1	0.140388	86	86	86	0	0	NA	3
./Mouse-Gut/ftp.ebi.ac.uk/pub/databases/metagenomics/mgnify_genomes/mouse-gut/v1.0/species_catalogue/MGYG0003281/MGYG000328195/genome/MGYG000328195.fna	0.151512	2	0.0103818	47.5	58	37	222850	263786	181913	Mouse-Gut	1	0.140592	35	35	35	0	0	NA	3
./Cow-Rumen/ftp.ebi.ac.uk/pub/databases/metagenomics/mgnify_genomes/cow-rumen/v1.0/species_catalogue/MGYG0002900/MGYG000290033/genome/MGYG000290033.fna	0.151883	2	0.0104303	30640.5	54808	6473	982670	1596151	369189	Cow-Rumen	1	0.140911	93	93	93	0	0	NA	3
./Chicken-Gut/ftp.ebi.ac.uk/pub/databases/metagenomics/mgnify_genomes/chicken-gut/v1.0/species_catalogue/MGYG0003081/MGYG000308120/genome/MGYG000308120.fna	0.152004	2	0.010446	11162	11309	11015	1122522	1821222	423822	Chicken-Gut	0	1	0	0	NA	0	0	NA	2
./Human-Gut/pub/databases/metagenomics/mgnify_genomes/human-gut/v2.0/species_catalogue/MGYG0000017/MGYG000001760/genome/MGYG000001760.fna	0.152115	2	0.0104605	21.5	26	17	793678	820580	766776	Human-Gut	6	1.51059e-08	21	37	2	0	0	NA	8
./Pig-Gut/ftp.ebi.ac.uk/pub/databases/metagenomics/mgnify_genomes/pig-gut/v1.0/species_catalogue/MGYG0003033/MGYG000303345/genome/MGYG000303345.fna	0.152377	2	0.0104948	33.5	35	32	283490	489140	77839	Pig-Gut	6	1.52595e-08	29.8333	66	8	0	0	NA	8
./Human-Gut/pub/databases/metagenomics/mgnify_genomes/human-gut/v2.0/species_catalogue/MGYG0000026/MGYG000002638/genome/MGYG000002638.fna	0.153138	2	0.0105946	22.5	30	15	619241	984152	254330	Human-Gut	3	0.000533839	87	163	32	0	0	NA	5
./Human-Gut/pub/databases/metagenomics/mgnify_genomes/human-gut/v2.0/species_catalogue/MGYG0000034/MGYG000003460/genome/MGYG000003460.fna	0.153225	2	0.0106061	9.5	12	7	804878	1230914	378842	Human-Gut	1	0.142064	202	202	202	0	0	NA	3
./Human-Gut/pub/databases/metagenomics/mgnify_genomes/human-gut/v2.0/species_catalogue/MGYG0000036/MGYG000003650/genome/MGYG000003650.fna	0.153237	2	0.0106076	10	15	5	867784	1439162	296406	Human-Gut	1	0.142074	74	74	74	0	0	NA	3
./Cow-Rumen/ftp.ebi.ac.uk/pub/databases/metagenomics/mgnify_genomes/cow-rumen/v1.0/species_catalogue/MGYG0002928/MGYG000292814/genome/MGYG000292814.fna	0.153624	2	0.0106586	7163.5	9718	4609	71140	110938	31342	Cow-Rumen	0	1	0	0	NA	0	0	NA	2
./Cow-Rumen/ftp.ebi.ac.uk/pub/databases/metagenomics/mgnify_genomes/cow-rumen/v1.0/species_catalogue/MGYG0002904/MGYG000290446/genome/MGYG000290446.fna	0.153745	2	0.0106745	62973.5	105830	20117	242549	286102	198996	Cow-Rumen	0	1	0	0	NA	0	0	NA	2
./Cow-Rumen/ftp.ebi.ac.uk/pub/databases/metagenomics/mgnify_genomes/cow-rumen/v1.0/species_catalogue/MGYG0002925/MGYG000292531/genome/MGYG000292531.fna	0.15376	2	0.0106765	24757	32860	16654	823800	1096066	551535	Cow-Rumen	1	0.142523	32	32	32	0	0	NA	3
./Non-Model-Fish-Gut/ftp.ebi.ac.uk/pub/databases/metagenomics/mgnify_genomes/non-model-fish-gut/v2.0/species_catalogue/MGYG0002995/MGYG000299511/genome/MGYG000299511.fna	0.154102	2	0.0107216	2649.5	5268	31	1151074	1881517	420631	Non-Model-Fish-Gut	5	6.37082e-07	126.8	191	26	0	0	NA	7
./Cow-Rumen/ftp.ebi.ac.uk/pub/databases/metagenomics/mgnify_genomes/cow-rumen/v1.0/species_catalogue/MGYG0002927/MGYG000292732/genome/MGYG000292732.fna	0.154711	2	0.0108021	7039.5	12053	2026	426562	622318	230807	Cow-Rumen	0	1	0	0	NA	0	0	NA	2
./Chicken-Gut/ftp.ebi.ac.uk/pub/databases/metagenomics/mgnify_genomes/chicken-gut/v1.0/species_catalogue/MGYG0003176/MGYG000317661/genome/MGYG000317661.fna	0.155373	2	0.01089	35411	37345	33477	836818	1344641	328994	Chicken-Gut	0	1	0	0	NA	0	0	NA	2
./Marine/ftp.ebi.ac.uk/pub/databases/metagenomics/mgnify_genomes/marine/v1.0/species_catalogue/MGYG0002972/MGYG000297297/genome/MGYG000297297.fna	0.155449	2	0.0109002	156467	210039	102895	1093313	1819573	367053	Marine	0	1	0	0	NA	0	0	NA	2
./Mouse-Gut/ftp.ebi.ac.uk/pub/databases/metagenomics/mgnify_genomes/mouse-gut/v1.0/species_catalogue/MGYG0003220/MGYG000322073/genome/MGYG000322073.fna	0.155799	2	0.0109468	266.5	506	27	91401.5	181789	1014	Mouse-Gut	2	0.0109468	70	72	68	145	149	141	4
./Chicken-Gut/ftp.ebi.ac.uk/pub/databases/metagenomics/mgnify_genomes/chicken-gut/v1.0/species_catalogue/MGYG0003078/MGYG000307810/genome/MGYG000307810.fna	0.155991	2	0.0109723	60338.5	105169	15508	1245454	2446661	44247	Chicken-Gut	0	1	0	0	NA	0	0	NA	2
./Human-Gut/pub/databases/metagenomics/mgnify_genomes/human-gut/v2.0/species_catalogue/MGYG0000015/MGYG000001567/genome/MGYG000001567.fna	0.15626	2	0.0110083	7.5	12	3	824350	1016906	631793	Human-Gut	0	1	0	0	NA	0	0	NA	2
./Mouse-Gut/ftp.ebi.ac.uk/pub/databases/metagenomics/mgnify_genomes/mouse-gut/v1.0/species_catalogue/MGYG0003224/MGYG000322447/genome/MGYG000322447.fna	0.156635	2	0.0110585	187254	302297	72211	21	24	18	Mouse-Gut	2	0.0110585	20	30	10	178	214	142	4
./Human-Gut/pub/databases/metagenomics/mgnify_genomes/human-gut/v2.0/species_catalogue/MGYG0000032/MGYG000003242/genome/MGYG000003242.fna	0.15668	2	0.0110644	12	18	6	969596	982619	956572	Human-Gut	0	1	0	0	NA	0	0	NA	2
./Non-Model-Fish-Gut/ftp.ebi.ac.uk/pub/databases/metagenomics/mgnify_genomes/non-model-fish-gut/v2.0/species_catalogue/MGYG0002995/MGYG000299505/genome/MGYG000299505.fna	0.15744	2	0.0111665	37.5	39	36	1070000	1237785	899742	Non-Model-Fish-Gut	0	1	0	0	NA	0	0	NA	2
./Human-Gut/pub/databases/metagenomics/mgnify_genomes/human-gut/v2.0/species_catalogue/MGYG0000022/MGYG000002289/genome/MGYG000002289.fna	0.157607	2	0.011189	354316	510383	198248	353426	508605	198248	Human-Gut	0	1	0	0	NA	0	0	NA	2
./Human-Gut/pub/databases/metagenomics/mgnify_genomes/human-gut/v2.0/species_catalogue/MGYG0000003/MGYG000000359/genome/MGYG000000359.fna	0.157745	2	0.0112075	50587.5	84712	16463	846858	1368633	325083	Human-Gut	2	0.0112075	19	36	2	0	0	NA	4
./Cow-Rumen/ftp.ebi.ac.uk/pub/databases/metagenomics/mgnify_genomes/cow-rumen/v1.0/species_catalogue/MGYG0002953/MGYG000295387/genome/MGYG000295387.fna	0.158016	2	0.0112441	1912.5	3437	388	1268945	2064137	473753	Cow-Rumen	0	1	0	0	NA	0	0	NA	2
./Mouse-Gut/ftp.ebi.ac.uk/pub/databases/metagenomics/mgnify_genomes/mouse-gut/v1.0/species_catalogue/MGYG0003224/MGYG000322496/genome/MGYG000322496.fna	0.158171	2	0.0112651	31658	62405	911	20.5	22	19	Mouse-Gut	0	1	0	0	NA	0	0	NA	2
./Pig-Gut/ftp.ebi.ac.uk/pub/databases/metagenomics/mgnify_genomes/pig-gut/v1.0/species_catalogue/MGYG0003012/MGYG000301249/genome/MGYG000301249.fna	0.158468	2	0.0113052	40866.5	72074	9659	642868	729157	556579	Pig-Gut	2	0.0113052	23.5	30	17	0	0	NA	4
./Mouse-Gut/ftp.ebi.ac.uk/pub/databases/metagenomics/mgnify_genomes/mouse-gut/v1.0/species_catalogue/MGYG0003226/MGYG000322661/genome/MGYG000322661.fna	0.158792	2	0.011349	5479	10922	36	74047.5	148082	13	Mouse-Gut	3	0.00059268	59.3333	68	43	115	118	112	5
./Cow-Rumen/ftp.ebi.ac.uk/pub/databases/metagenomics/mgnify_genomes/cow-rumen/v1.0/species_catalogue/MGYG0002944/MGYG000294498/genome/MGYG000294498.fna	0.159203	2	0.0114048	11242	12171	10313	107523	159314	55732	Cow-Rumen	2	0.0114048	14	19	9	30	43	17	4
./Marine/ftp.ebi.ac.uk/pub/databases/metagenomics/mgnify_genomes/marine/v1.0/species_catalogue/MGYG0002967/MGYG000296755/genome/MGYG000296755.fna	0.159546	2	0.0114514	19402	34953	3851	524940	883204	166675	Marine	0	1	0	0	NA	0	0	NA	2
./Human-Gut/pub/databases/metagenomics/mgnify_genomes/human-gut/v2.0/species_catalogue/MGYG0000029/MGYG000002944/genome/MGYG000002944.fna	0.159681	2	0.0114697	12.5	17	8	738926	828788	649065	Human-Gut	0	1	0	0	NA	0	0	NA	2
./Mouse-Gut/ftp.ebi.ac.uk/pub/databases/metagenomics/mgnify_genomes/mouse-gut/v1.0/species_catalogue/MGYG0003233/MGYG000323364/genome/MGYG000323364.fna	0.159824	2	0.0114892	13598	22988	4208	1005188	1251900	758476	Mouse-Gut	0	1	0	0	NA	0	0	NA	2
./Human-Gut/pub/databases/metagenomics/mgnify_genomes/human-gut/v2.0/species_catalogue/MGYG0000020/MGYG000002085/genome/MGYG000002085.fna	0.159886	2	0.0114977	32.5	36	29	849254	1564652	133855	Human-Gut	0	1	0	0	NA	0	0	NA	2
./Mouse-Gut/ftp.ebi.ac.uk/pub/databases/metagenomics/mgnify_genomes/mouse-gut/v1.0/species_catalogue/MGYG0003269/MGYG000326974/genome/MGYG000326974.fna	0.159912	2	0.0115011	19303	36954	1652	1300000	2269990	324695	Mouse-Gut	0	1	0	0	NA	0	0	NA	2
./Human-Gut/pub/databases/metagenomics/mgnify_genomes/human-gut/v2.0/species_catalogue/MGYG0000008/MGYG000000806/genome/MGYG000000806.fna	0.160006	2	0.011514	23368.5	46736	1	1030000	1838108	230699	Human-Gut	3	0.000605827	14.3333	24	4	0	0	NA	5
./Cow-Rumen/ftp.ebi.ac.uk/pub/databases/metagenomics/mgnify_genomes/cow-rumen/v1.0/species_catalogue/MGYG0002951/MGYG000295131/genome/MGYG000295131.fna	0.160581	2	0.0115926	23266.5	40490	6043	333268	368169	298368	Cow-Rumen	2	0.0115926	41	75	7	50	91	9	4
./Mouse-Gut/ftp.ebi.ac.uk/pub/databases/metagenomics/mgnify_genomes/mouse-gut/v1.0/species_catalogue/MGYG0003664/MGYG000366406/genome/MGYG000366406.fna	0.160657	2	0.0116029	36173.5	72216	131	7635.5	15263	8	Mouse-Gut	0	1	0	0	NA	0	0	NA	2
./Chicken-Gut/ftp.ebi.ac.uk/pub/databases/metagenomics/mgnify_genomes/chicken-gut/v1.0/species_catalogue/MGYG0003081/MGYG000308104/genome/MGYG000308104.fna	0.16159	2	0.0117309	4698	6302	3094	1100000	1424309	766262	Chicken-Gut	1	0.14921	51	51	51	0	0	NA	3
./Chicken-Gut/ftp.ebi.ac.uk/pub/databases/metagenomics/mgnify_genomes/chicken-gut/v1.0/species_catalogue/MGYG0003148/MGYG000314802/genome/MGYG000314802.fna	0.162114	2	0.011803	24715	31441	17989	757715	1495595	19835	Chicken-Gut	0	1	0	0	NA	0	0	NA	2
./Human-Gut/pub/databases/metagenomics/mgnify_genomes/human-gut/v2.0/species_catalogue/MGYG0000016/MGYG000001633/genome/MGYG000001633.fna	0.162137	2	0.0118062	27248	41946	12550	795165	1416787	173543	Human-Gut	0	1	0	0	NA	0	0	NA	2
./Cow-Rumen/ftp.ebi.ac.uk/pub/databases/metagenomics/mgnify_genomes/cow-rumen/v1.0/species_catalogue/MGYG0002914/MGYG000291448/genome/MGYG000291448.fna	0.162348	2	0.0118353	7540.5	9272	5809	356927	384594	329260	Cow-Rumen	1	0.149855	122	122	122	17	17	17	3
./Mouse-Gut/ftp.ebi.ac.uk/pub/databases/metagenomics/mgnify_genomes/mouse-gut/v1.0/species_catalogue/MGYG0003255/MGYG000325518/genome/MGYG000325518.fna	0.162705	2	0.0118846	14440.5	16086	12795	1000289	1371233	629345	Mouse-Gut	0	1	0	0	NA	0	0	NA	2
./Mouse-Gut/ftp.ebi.ac.uk/pub/databases/metagenomics/mgnify_genomes/mouse-gut/v1.0/species_catalogue/MGYG0003269/MGYG000326926/genome/MGYG000326926.fna	0.163098	2	0.0119391	14	23	5	429362	741068	117656	Mouse-Gut	0	1	0	0	NA	0	0	NA	2
./Mouse-Gut/ftp.ebi.ac.uk/pub/databases/metagenomics/mgnify_genomes/mouse-gut/v1.0/species_catalogue/MGYG0003291/MGYG000329160/genome/MGYG000329160.fna	0.163472	2	0.0119909	5347	10656	38	968446	1676972	259920	Mouse-Gut	4	2.61168e-05	172.75	313	35	0	0	NA	6
./Chicken-Gut/ftp.ebi.ac.uk/pub/databases/metagenomics/mgnify_genomes/chicken-gut/v1.0/species_catalogue/MGYG0003110/MGYG000311016/genome/MGYG000311016.fna	0.163508	2	0.0119959	5667.5	8265	3070	587836	979705	195966	Chicken-Gut	0	1	0	0	NA	0	0	NA	2
./Human-Gut/pub/databases/metagenomics/mgnify_genomes/human-gut/v2.0/species_catalogue/MGYG0000019/MGYG000001921/genome/MGYG000001921.fna	0.164477	2	0.0121308	19037	27703	10371	988158	1333500	642815	Human-Gut	0	1	0	0	NA	0	0	NA	2
./Marine/ftp.ebi.ac.uk/pub/databases/metagenomics/mgnify_genomes/marine/v1.0/species_catalogue/MGYG0002965/MGYG000296575/genome/MGYG000296575.fna	0.164492	2	0.0121328	31.5	36	27	368647	651027	86267	Marine	1	0.151675	133	133	133	0	0	NA	3
./Cow-Rumen/ftp.ebi.ac.uk/pub/databases/metagenomics/mgnify_genomes/cow-rumen/v1.0/species_catalogue/MGYG0002901/MGYG000290111/genome/MGYG000290111.fna	0.165086	2	0.0122158	5769.5	11101	438	966682	1211185	722179	Cow-Rumen	1	0.152179	20	20	20	0	0	NA	3
./Chicken-Gut/ftp.ebi.ac.uk/pub/databases/metagenomics/mgnify_genomes/chicken-gut/v1.0/species_catalogue/MGYG0003081/MGYG000308117/genome/MGYG000308117.fna	0.165192	2	0.0122307	19209.5	20753	17666	1310369	1630191	990547	Chicken-Gut	2	0.0122307	151.5	227	76	0	0	NA	4
./Mouse-Gut/ftp.ebi.ac.uk/pub/databases/metagenomics/mgnify_genomes/mouse-gut/v1.0/species_catalogue/MGYG0003296/MGYG000329682/genome/MGYG000329682.fna	0.166567	2	0.012424	1789.5	3539	40	142597	242567	42627	Mouse-Gut	0	1	0	0	NA	0	0	NA	2
./Cow-Rumen/ftp.ebi.ac.uk/pub/databases/metagenomics/mgnify_genomes/cow-rumen/v1.0/species_catalogue/MGYG0002923/MGYG000292344/genome/MGYG000292344.fna	0.166862	2	0.0124655	39148	45088	33208	1141986	1172285	1111687	Cow-Rumen	0	1	0	0	NA	0	0	NA	2
./Pig-Gut/ftp.ebi.ac.uk/pub/databases/metagenomics/mgnify_genomes/pig-gut/v1.0/species_catalogue/MGYG0003013/MGYG000301384/genome/MGYG000301384.fna	0.167095	2	0.0124985	32.5	37	28	715372	1278789	151955	Pig-Gut	5	9.44685e-07	191.4	437	13	0	0	NA	7
./Mouse-Gut/ftp.ebi.ac.uk/pub/databases/metagenomics/mgnify_genomes/mouse-gut/v1.0/species_catalogue/MGYG0003313/MGYG000331306/genome/MGYG000331306.fna	0.167654	2	0.0125776	34.5	41	28	1020000	2038936	5247	Mouse-Gut	1	0.154354	29	29	29	0	0	NA	3
./Human-Gut/pub/databases/metagenomics/mgnify_genomes/human-gut/v2.0/species_catalogue/MGYG0000026/MGYG000002668/genome/MGYG000002668.fna	0.167825	2	0.0126018	21	23	19	120728	198995	42460	Human-Gut	0	1	0	0	NA	0	0	NA	2
./Pig-Gut/ftp.ebi.ac.uk/pub/databases/metagenomics/mgnify_genomes/pig-gut/v1.0/species_catalogue/MGYG0003013/MGYG000301303/genome/MGYG000301303.fna	0.16852	2	0.0127007	46.5	82	11	958524	1769077	147972	Pig-Gut	0	1	0	0	NA	0	0	NA	2
./Human-Gut/pub/databases/metagenomics/mgnify_genomes/human-gut/v2.0/species_catalogue/MGYG0000015/MGYG000001538/genome/MGYG000001538.fna	0.169042	2	0.0127751	56930	100203	13657	1315303	2397553	233053	Human-Gut	0	1	0	0	NA	0	0	NA	2
./Human-Gut/pub/databases/metagenomics/mgnify_genomes/human-gut/v2.0/species_catalogue/MGYG0000034/MGYG000003489/genome/MGYG000003489.fna	0.169285	2	0.0128099	19.5	23	16	1090000	1564489	608490	Human-Gut	9	2.70228e-13	201.444	320	25	0	0	NA	11
./Chicken-Gut/ftp.ebi.ac.uk/pub/databases/metagenomics/mgnify_genomes/chicken-gut/v1.0/species_catalogue/MGYG0003079/MGYG000307956/genome/MGYG000307956.fna	0.169363	2	0.012821	17420	25820	9020	714211	1391835	36587	Chicken-Gut	0	1	0	0	NA	0	0	NA	2
./Chicken-Gut/ftp.ebi.ac.uk/pub/databases/metagenomics/mgnify_genomes/chicken-gut/v1.0/species_catalogue/MGYG0003098/MGYG000309871/genome/MGYG000309871.fna	0.170127	2	0.0129304	23452	41463	5441	1263642	1975960	551324	Chicken-Gut	4	3.04752e-05	133.667	185	104	0	0	NA	6
./Human-Gut/pub/databases/metagenomics/mgnify_genomes/human-gut/v2.0/species_catalogue/MGYG0000031/MGYG000003198/genome/MGYG000003198.fna	0.170221	2	0.0129439	2.5	3	2	902811	952236	853386	Human-Gut	1	0.156522	46	46	46	0	0	NA	3
./Human-Gut/pub/databases/metagenomics/mgnify_genomes/human-gut/v2.0/species_catalogue/MGYG0000036/MGYG000003613/genome/MGYG000003613.fna	0.170641	2	0.0130042	10	18	2	1177448	1838414	516482	Human-Gut	3	0.000729047	86.3333	136	19	0	0	NA	5
./Human-Gut/pub/databases/metagenomics/mgnify_genomes/human-gut/v2.0/species_catalogue/MGYG0000047/MGYG000004791/genome/MGYG000004791.fna	0.170671	2	0.0130085	40.5	42	39	423318	786972	59665	Human-Gut	0	1	0	0	NA	0	0	NA	2
./Chicken-Gut/ftp.ebi.ac.uk/pub/databases/metagenomics/mgnify_genomes/chicken-gut/v1.0/species_catalogue/MGYG0003076/MGYG000307664/genome/MGYG000307664.fna	0.171414	2	0.0131156	14097.5	16918	11277	470680	800074	141287	Chicken-Gut	1	0.157527	39	39	39	0	0	NA	3
./Mouse-Gut/ftp.ebi.ac.uk/pub/databases/metagenomics/mgnify_genomes/mouse-gut/v1.0/species_catalogue/MGYG0003284/MGYG000328446/genome/MGYG000328446.fna	0.171526	2	0.0131318	19.5	36	3	384226	752490	15962	Mouse-Gut	4	3.14547e-05	40	51	20	0	0	NA	6
./Mouse-Gut/ftp.ebi.ac.uk/pub/databases/metagenomics/mgnify_genomes/mouse-gut/v1.0/species_catalogue/MGYG0003219/MGYG000321962/genome/MGYG000321962.fna	0.171884	2	0.0131836	12	18	6	79651	158455	847	Mouse-Gut	1	0.157923	2	2	2	0	0	NA	3
./Human-Gut/pub/databases/metagenomics/mgnify_genomes/human-gut/v2.0/species_catalogue/MGYG0000010/MGYG000001004/genome/MGYG000001004.fna	0.172967	2	0.0133408	19032.5	35440	2625	938972	1190477	687468	Human-Gut	3	0.000757963	21.6667	27	13	0	0	NA	5
./Human-Gut/pub/databases/metagenomics/mgnify_genomes/human-gut/v2.0/species_catalogue/MGYG0000026/MGYG000002633/genome/MGYG000002633.fna	0.172985	2	0.0133434	16350.5	32678	23	726129	1068676	383582	Human-Gut	3	0.000758183	45.6667	62	22	0	0	NA	5
./Marine/ftp.ebi.ac.uk/pub/databases/metagenomics/mgnify_genomes/marine/v1.0/species_catalogue/MGYG0002971/MGYG000297199/genome/MGYG000297199.fna	0.173087	2	0.0133583	17753.5	25861	9646	1427140	2238876	615404	Marine	0	1	0	0	NA	0	0	NA	2
./Mouse-Gut/ftp.ebi.ac.uk/pub/databases/metagenomics/mgnify_genomes/mouse-gut/v1.0/species_catalogue/MGYG0003276/MGYG000327681/genome/MGYG000327681.fna	0.173377	2	0.0134006	34223	62854	5592	427656	569935	285378	Mouse-Gut	0	1	0	0	NA	0	0	NA	2
./Cow-Rumen/ftp.ebi.ac.uk/pub/databases/metagenomics/mgnify_genomes/cow-rumen/v1.0/species_catalogue/MGYG0002919/MGYG000291965/genome/MGYG000291965.fna	0.173678	2	0.0134444	18152.5	34192	2113	1310000	2016683	607686	Cow-Rumen	0	1	0	0	NA	0	0	NA	2
./Cow-Rumen/ftp.ebi.ac.uk/pub/databases/metagenomics/mgnify_genomes/cow-rumen/v1.0/species_catalogue/MGYG0002909/MGYG000290972/genome/MGYG000290972.fna	0.174419	2	0.0135527	4199	4909	3489	1320000	1526955	1122820	Cow-Rumen	0	1	0	0	NA	0	0	NA	2
./Human-Gut/pub/databases/metagenomics/mgnify_genomes/human-gut/v2.0/species_catalogue/MGYG0000032/MGYG000003249/genome/MGYG000003249.fna	0.174579	2	0.0135763	7	10	4	219620	398019	41221	Human-Gut	7	8.41897e-10	298.571	388	97	0	0	NA	9
./Cow-Rumen/ftp.ebi.ac.uk/pub/databases/metagenomics/mgnify_genomes/cow-rumen/v1.0/species_catalogue/MGYG0002928/MGYG000292863/genome/MGYG000292863.fna	0.174925	2	0.013627	65173	76189	54157	1325560	2579025	72095	Cow-Rumen	0	1	0	0	NA	0	0	NA	2
./Marine/ftp.ebi.ac.uk/pub/databases/metagenomics/mgnify_genomes/marine/v1.0/species_catalogue/MGYG0002966/MGYG000296682/genome/MGYG000296682.fna	0.176289	2	0.0138279	59	89	29	775333	1443567	107099	Marine	3	0.000800492	4.66667	9	2	0	0	NA	5
./Mouse-Gut/ftp.ebi.ac.uk/pub/databases/metagenomics/mgnify_genomes/mouse-gut/v1.0/species_catalogue/MGYG0003247/MGYG000324718/genome/MGYG000324718.fna	0.178207	2	0.0141126	14	16	12	40176.5	72746	7607	Mouse-Gut	0	1	0	0	NA	0	0	NA	2
./Human-Gut/pub/databases/metagenomics/mgnify_genomes/human-gut/v2.0/species_catalogue/MGYG0000041/MGYG000004114/genome/MGYG000004114.fna	0.178307	2	0.0141276	110036	114091	105982	1274937	2292827	257047	Human-Gut	0	1	0	0	NA	0	0	NA	2
./Human-Gut/pub/databases/metagenomics/mgnify_genomes/human-gut/v2.0/species_catalogue/MGYG0000042/MGYG000004269/genome/MGYG000004269.fna	0.178798	2	0.0142009	30391	30436	30346	1336152	2510723	161581	Human-Gut	1	0.163725	15	15	15	0	0	NA	3
./Mouse-Gut/ftp.ebi.ac.uk/pub/databases/metagenomics/mgnify_genomes/mouse-gut/v1.0/species_catalogue/MGYG0003225/MGYG000322596/genome/MGYG000322596.fna	0.17897	2	0.0142266	35494	70986	2	594525	951309	237741	Mouse-Gut	3	0.000835902	20.3333	27	15	103	136	70	5
./Chicken-Gut/ftp.ebi.ac.uk/pub/databases/metagenomics/mgnify_genomes/chicken-gut/v1.0/species_catalogue/MGYG0003097/MGYG000309788/genome/MGYG000309788.fna	0.179249	2	0.0142685	27921.5	37062	18781	912693	939136	886250	Chicken-Gut	1	0.164102	16	16	16	0	0	NA	3
./Mouse-Gut/ftp.ebi.ac.uk/pub/databases/metagenomics/mgnify_genomes/mouse-gut/v1.0/species_catalogue/MGYG0003229/MGYG000322968/genome/MGYG000322968.fna	0.180569	2	0.0144668	17	31	3	1306868	2586055	27681	Mouse-Gut	0	1	0	0	NA	0	0	NA	2
./Pig-Gut/ftp.ebi.ac.uk/pub/databases/metagenomics/mgnify_genomes/pig-gut/v1.0/species_catalogue/MGYG0003020/MGYG000302054/genome/MGYG000302054.fna	0.180969	2	0.0145271	38841	73888	3794	1216689	1257972	1175406	Pig-Gut	1	0.165538	29	29	29	0	0	NA	3
./Mouse-Gut/ftp.ebi.ac.uk/pub/databases/metagenomics/mgnify_genomes/mouse-gut/v1.0/species_catalogue/MGYG0003230/MGYG000323047/genome/MGYG000323047.fna	0.181441	2	0.0145985	52706	92101	13311	1500000	2599434	406733	Mouse-Gut	0	1	0	0	NA	0	0	NA	2
./Mouse-Gut/ftp.ebi.ac.uk/pub/databases/metagenomics/mgnify_genomes/mouse-gut/v1.0/species_catalogue/MGYG0003220/MGYG000322062/genome/MGYG000322062.fna	0.18175	2	0.0146453	26339	38525	14153	438656	505127	372186	Mouse-Gut	0	1	0	0	NA	0	0	NA	2
./Marine/ftp.ebi.ac.uk/pub/databases/metagenomics/mgnify_genomes/marine/v1.0/species_catalogue/MGYG0002966/MGYG000296693/genome/MGYG000296693.fna	0.181837	2	0.0146584	35.5	56	15	260290	362746	157833	Marine	2	0.0146584	345.5	523	168	0	0	NA	4
./Human-Oral/ftp.ebi.ac.uk/pub/databases/metagenomics/mgnify_genomes/human-oral/v1.0/species_catalogue/MGYG0002981/MGYG000298105/genome/MGYG000298105.fna	0.182914	2	0.0148221	32942	65862	22	788267	1535415	41119	Human-Oral	0	1	0	0	NA	0	0	NA	2
./Human-Gut/pub/databases/metagenomics/mgnify_genomes/human-gut/v2.0/species_catalogue/MGYG0000015/MGYG000001528/genome/MGYG000001528.fna	0.182976	2	0.0148316	944786	1002732	886839	125862	219396	32327	Human-Gut	0	1	0	0	NA	0	0	NA	2
./Human-Gut/pub/databases/metagenomics/mgnify_genomes/human-gut/v2.0/species_catalogue/MGYG0000035/MGYG000003569/genome/MGYG000003569.fna	0.183186	2	0.0148636	14	14	14	1476441	2795143	157739	Human-Gut	1	0.167387	10	10	10	0	0	NA	3
./Cow-Rumen/ftp.ebi.ac.uk/pub/databases/metagenomics/mgnify_genomes/cow-rumen/v1.0/species_catalogue/MGYG0002903/MGYG000290389/genome/MGYG000290389.fna	0.183311	2	0.0148827	4003	5228	2778	603554	702204	504903	Cow-Rumen	1	0.167491	90	90	90	107	107	107	3
./Mouse-Gut/ftp.ebi.ac.uk/pub/databases/metagenomics/mgnify_genomes/mouse-gut/v1.0/species_catalogue/MGYG0003310/MGYG000331007/genome/MGYG000331007.fna	0.183473	2	0.0149074	31	40	22	1007244	1868209	146279	Mouse-Gut	0	1	0	0	NA	0	0	NA	2
./Human-Gut/pub/databases/metagenomics/mgnify_genomes/human-gut/v2.0/species_catalogue/MGYG0000032/MGYG000003226/genome/MGYG000003226.fna	0.183722	2	0.0149455	16.5	23	10	742165	1271275	213055	Human-Gut	2	0.0149455	125	136	114	0	0	NA	4
./Human-Gut/pub/databases/metagenomics/mgnify_genomes/human-gut/v2.0/species_catalogue/MGYG0000016/MGYG000001663/genome/MGYG000001663.fna	0.184152	2	0.0150113	9	13	5	1300000	1717058	876521	Human-Gut	7	1.21315e-09	32	67	6	0	0	NA	9
./Cow-Rumen/ftp.ebi.ac.uk/pub/databases/metagenomics/mgnify_genomes/cow-rumen/v1.0/species_catalogue/MGYG0002912/MGYG000291205/genome/MGYG000291205.fna	0.184434	2	0.0150546	62446	107130	17762	1322163	2415521	228805	Cow-Rumen	0	1	0	0	NA	0	0	NA	2
./Pig-Gut/ftp.ebi.ac.uk/pub/databases/metagenomics/mgnify_genomes/pig-gut/v1.0/species_catalogue/MGYG0003030/MGYG000303008/genome/MGYG000303008.fna	0.184574	2	0.015076	1045	2089	1	1240000	2169473	300556	Pig-Gut	0	1	0	0	NA	0	0	NA	2
./Non-Model-Fish-Gut/ftp.ebi.ac.uk/pub/databases/metagenomics/mgnify_genomes/non-model-fish-gut/v2.0/species_catalogue/MGYG0002996/MGYG000299695/genome/MGYG000299695.fna	0.185054	2	0.0151498	37.5	39	36	150528	250635	50420	Non-Model-Fish-Gut	0	1	0	0	NA	0	0	NA	2
./Chicken-Gut/ftp.ebi.ac.uk/pub/databases/metagenomics/mgnify_genomes/chicken-gut/v1.0/species_catalogue/MGYG0003169/MGYG000316912/genome/MGYG000316912.fna	0.186196	2	0.0153259	67473	121542	13404	1390000	2432119	349184	Chicken-Gut	1	0.169889	8	8	8	0	0	NA	3
./Human-Gut/pub/databases/metagenomics/mgnify_genomes/human-gut/v2.0/species_catalogue/MGYG0000022/MGYG000002292/genome/MGYG000002292.fna	0.187006	2	0.0154512	130172	255470	4873	263688	492962	34415	Human-Gut	0	1	0	0	NA	0	0	NA	2
./Marine/ftp.ebi.ac.uk/pub/databases/metagenomics/mgnify_genomes/marine/v1.0/species_catalogue/MGYG0002970/MGYG000297061/genome/MGYG000297061.fna	0.187085	2	0.0154635	39.5	40	39	573439	706237	440641	Marine	1	0.170627	34	34	34	0	0	NA	3
./Chicken-Gut/ftp.ebi.ac.uk/pub/databases/metagenomics/mgnify_genomes/chicken-gut/v1.0/species_catalogue/MGYG0003122/MGYG000312233/genome/MGYG000312233.fna	0.187668	2	0.0155541	4973.5	9719	228	618820	737602	500037	Chicken-Gut	1	0.17111	15	15	15	0	0	NA	3
./Mouse-Gut/ftp.ebi.ac.uk/pub/databases/metagenomics/mgnify_genomes/mouse-gut/v1.0/species_catalogue/MGYG0003245/MGYG000324525/genome/MGYG000324525.fna	0.188599	2	0.0156991	54520.5	55744	53297	1500000	2817952	182845	Mouse-Gut	0	1	0	0	NA	0	0	NA	2
./Marine/ftp.ebi.ac.uk/pub/databases/metagenomics/mgnify_genomes/marine/v1.0/species_catalogue/MGYG0002970/MGYG000297016/genome/MGYG000297016.fna	0.189874	2	0.0158989	45	59	31	358346	662680	54013	Marine	0	1	0	0	NA	0	0	NA	2
./Pig-Gut/ftp.ebi.ac.uk/pub/databases/metagenomics/mgnify_genomes/pig-gut/v1.0/species_catalogue/MGYG0003022/MGYG000302232/genome/MGYG000302232.fna	0.190002	2	0.015919	4.5	7	2	1308184	1719231	897137	Pig-Gut	2	0.015919	150	293	7	0	0	NA	4
./Human-Gut/pub/databases/metagenomics/mgnify_genomes/human-gut/v2.0/species_catalogue/MGYG0000003/MGYG000000325/genome/MGYG000000325.fna	0.190374	2	0.0159775	22366.5	29159	15574	1060000	1546599	570230	Human-Gut	0	1	0	0	NA	0	0	NA	2
./Marine/ftp.ebi.ac.uk/pub/databases/metagenomics/mgnify_genomes/marine/v1.0/species_catalogue/MGYG0002974/MGYG000297431/genome/MGYG000297431.fna	0.190784	2	0.0160421	74.5	78	71	671726	793332	550121	Marine	4	4.74118e-05	37.5	71	6	0	0	NA	6
./Human-Oral/ftp.ebi.ac.uk/pub/databases/metagenomics/mgnify_genomes/human-oral/v1.0/species_catalogue/MGYG0002992/MGYG000299236/genome/MGYG000299236.fna	0.191605	2	0.0161717	28.5	31	26	804374	1498470	110277	Human-Oral	0	1	0	0	NA	0	0	NA	2
./Mouse-Gut/ftp.ebi.ac.uk/pub/databases/metagenomics/mgnify_genomes/mouse-gut/v1.0/species_catalogue/MGYG0003247/MGYG000324738/genome/MGYG000324738.fna	0.19189	2	0.0162168	64085	109595	18575	1442924	2697614	188234	Mouse-Gut	0	1	0	0	NA	0	0	NA	2
./Mouse-Gut/ftp.ebi.ac.uk/pub/databases/metagenomics/mgnify_genomes/mouse-gut/v1.0/species_catalogue/MGYG0004113/MGYG000411368/genome/MGYG000411368.fna	0.192949	2	0.0163849	25031	45869	4193	1539959	1588448	1491470	Mouse-Gut	1	0.175476	9	9	9	0	0	NA	3
./Human-Gut/pub/databases/metagenomics/mgnify_genomes/human-gut/v2.0/species_catalogue/MGYG0000013/MGYG000001315/genome/MGYG000001315.fna	0.193243	2	0.0164316	266028	439049	93008	247972	439049	56895	Human-Gut	0	1	0	0	NA	0	0	NA	2
./Human-Gut/pub/databases/metagenomics/mgnify_genomes/human-gut/v2.0/species_catalogue/MGYG0000023/MGYG000002376/genome/MGYG000002376.fna	0.194705	2	0.0166652	19267.5	33261	5274	837082	943822	730341	Human-Gut	0	1	0	0	NA	0	0	NA	2
./Human-Gut/pub/databases/metagenomics/mgnify_genomes/human-gut/v2.0/species_catalogue/MGYG0000000/MGYG000000052/genome/MGYG000000052.fna	0.195218	2	0.0167476	17745	18785	16705	546975	595933	498017	Human-Gut	0	1	0	0	NA	0	0	NA	2
./Human-Gut/pub/databases/metagenomics/mgnify_genomes/human-gut/v2.0/species_catalogue/MGYG0000018/MGYG000001884/genome/MGYG000001884.fna	0.195806	2	0.0168421	418.5	515	322	674339	1109469	239209	Human-Gut	1	0.177828	131	131	131	0	0	NA	3
./Human-Gut/pub/databases/metagenomics/mgnify_genomes/human-gut/v2.0/species_catalogue/MGYG0000013/MGYG000001389/genome/MGYG000001389.fna	0.195931	2	0.0168622	157530	203919	111140	34400.5	41523	27278	Human-Gut	1	0.177931	7	7	7	1057	1057	1057	3
./Mouse-Gut/ftp.ebi.ac.uk/pub/databases/metagenomics/mgnify_genomes/mouse-gut/v1.0/species_catalogue/MGYG0003283/MGYG000328399/genome/MGYG000328399.fna	0.196074	2	0.0168853	3301.5	3487	3116	1470000	2460652	473307	Mouse-Gut	1	0.178049	139	139	139	0	0	NA	3
./Marine/ftp.ebi.ac.uk/pub/databases/metagenomics/mgnify_genomes/marine/v1.0/species_catalogue/MGYG0002974/MGYG000297447/genome/MGYG000297447.fna	0.1965	2	0.0169541	33.5	53	14	27894.5	43016	12773	Marine	4	5.31126e-05	171	267	5	0	0	NA	6
./Cow-Rumen/ftp.ebi.ac.uk/pub/databases/metagenomics/mgnify_genomes/cow-rumen/v1.0/species_catalogue/MGYG0002940/MGYG000294095/genome/MGYG000294095.fna	0.197872	2	0.0171762	99488	118475	80501	1030000	1355084	701393	Cow-Rumen	0	1	0	0	NA	0	0	NA	2
./Human-Gut/pub/databases/metagenomics/mgnify_genomes/human-gut/v2.0/species_catalogue/MGYG0000042/MGYG000004290/genome/MGYG000004290.fna	0.198036	2	0.0172028	3	3	3	1113632	1867141	360123	Human-Gut	5	2.153e-06	122.6	254	10	0	0	NA	7
./Marine/ftp.ebi.ac.uk/pub/databases/metagenomics/mgnify_genomes/marine/v1.0/species_catalogue/MGYG0002961/MGYG000296106/genome/MGYG000296106.fna	0.198679	2	0.0173074	17	19	15	340706	441205	240206	Marine	1	0.180187	164	164	164	0	0	NA	3
./Mouse-Gut/ftp.ebi.ac.uk/pub/databases/metagenomics/mgnify_genomes/mouse-gut/v1.0/species_catalogue/MGYG0004031/MGYG000403150/genome/MGYG000403150.fna	0.200176	2	0.0175519	17.5	19	16	273693	476408	70978	Mouse-Gut	2	0.0175519	59.5	107	12	0	0	NA	4
./Cow-Rumen/ftp.ebi.ac.uk/pub/databases/metagenomics/mgnify_genomes/cow-rumen/v1.0/species_catalogue/MGYG0002932/MGYG000293239/genome/MGYG000293239.fna	0.200661	2	0.0176315	1252	1964	540	91105	141421	40789	Cow-Rumen	0	1	0	0	NA	0	0	NA	2
./Cow-Rumen/ftp.ebi.ac.uk/pub/databases/metagenomics/mgnify_genomes/cow-rumen/v1.0/species_catalogue/MGYG0002900/MGYG000290075/genome/MGYG000290075.fna	0.201554	2	0.0177783	3374	6084	664	148834	225660	72007	Cow-Rumen	0	1	0	0	NA	0	0	NA	2
./Mouse-Gut/ftp.ebi.ac.uk/pub/databases/metagenomics/mgnify_genomes/mouse-gut/v1.0/species_catalogue/MGYG0003268/MGYG000326866/genome/MGYG000326866.fna	0.201805	2	0.0178198	35.5	37	34	306872	582949	30796	Mouse-Gut	4	5.88361e-05	122.5	174	48	0	0	NA	6
./Marine/ftp.ebi.ac.uk/pub/databases/metagenomics/mgnify_genomes/marine/v1.0/species_catalogue/MGYG0002964/MGYG000296484/genome/MGYG000296484.fna	0.202593	2	0.0179498	4	5	3	789668	1360389	218946	Marine	2	0.0179498	77	129	25	0	0	NA	4
./Chicken-Gut/ftp.ebi.ac.uk/pub/databases/metagenomics/mgnify_genomes/chicken-gut/v1.0/species_catalogue/MGYG0003103/MGYG000310334/genome/MGYG000310334.fna	0.203091	2	0.0180324	12751	24745	757	1210000	1446175	978780	Chicken-Gut	1	0.183796	35	35	35	0	0	NA	3
./Human-Gut/pub/databases/metagenomics/mgnify_genomes/human-gut/v2.0/species_catalogue/MGYG0000015/MGYG000001531/genome/MGYG000001531.fna	0.203407	2	0.0180848	980240	1361221	599258	1370000	1386522	1361221	Human-Gut	0	1	0	0	NA	0	0	NA	2
./Mouse-Gut/ftp.ebi.ac.uk/pub/databases/metagenomics/mgnify_genomes/mouse-gut/v1.0/species_catalogue/MGYG0003458/MGYG000345898/genome/MGYG000345898.fna	0.20459	2	0.0182816	296.5	584	9	1529.5	3025	34	Mouse-Gut	0	1	0	0	NA	0	0	NA	2
./Chicken-Gut/ftp.ebi.ac.uk/pub/databases/metagenomics/mgnify_genomes/chicken-gut/v1.0/species_catalogue/MGYG0003172/MGYG000317293/genome/MGYG000317293.fna	0.205206	2	0.0183843	19630	35392	3868	720248	1059465	381031	Chicken-Gut	0	1	0	0	NA	0	0	NA	2
./Chicken-Gut/ftp.ebi.ac.uk/pub/databases/metagenomics/mgnify_genomes/chicken-gut/v1.0/species_catalogue/MGYG0003206/MGYG000320616/genome/MGYG000320616.fna	0.205372	2	0.0184122	9747.5	15405	4090	563310	1090935	35684	Chicken-Gut	1	0.185656	4	4	4	0	0	NA	3
./Mouse-Gut/ftp.ebi.ac.uk/pub/databases/metagenomics/mgnify_genomes/mouse-gut/v1.0/species_catalogue/MGYG0003228/MGYG000322827/genome/MGYG000322827.fna	0.208515	2	0.018941	68256.5	120836	15677	390026	640111	139942	Mouse-Gut	1	0.188211	2	2	2	0	0	NA	3
./Human-Gut/pub/databases/metagenomics/mgnify_genomes/human-gut/v2.0/species_catalogue/MGYG0000005/MGYG000000526/genome/MGYG000000526.fna	0.209189	2	0.0190553	10	11	9	1103886	1496428	711344	Human-Gut	2	0.0190553	12	16	8	0	0	NA	4
./Mouse-Gut/ftp.ebi.ac.uk/pub/databases/metagenomics/mgnify_genomes/mouse-gut/v1.0/species_catalogue/MGYG0004108/MGYG000410838/genome/MGYG000410838.fna	0.209194	2	0.0190561	57752.5	108720	6785	281834	446012	117656	Mouse-Gut	1	0.188762	4	4	4	14	14	14	3
./Mouse-Gut/ftp.ebi.ac.uk/pub/databases/metagenomics/mgnify_genomes/mouse-gut/v1.0/species_catalogue/MGYG0003227/MGYG000322709/genome/MGYG000322709.fna	0.209309	2	0.0190756	36.5	37	36	10983.5	21930	37	Mouse-Gut	4	6.76828e-05	101.75	109	93	86.5	103	70	6
./Mouse-Gut/ftp.ebi.ac.uk/pub/databases/metagenomics/mgnify_genomes/mouse-gut/v1.0/species_catalogue/MGYG0003224/MGYG000322485/genome/MGYG000322485.fna	0.209563	2	0.0191188	20960	31797	10123	85314.5	143944	26685	Mouse-Gut	1	0.189062	91	91	91	244	244	244	3
./Human-Gut/pub/databases/metagenomics/mgnify_genomes/human-gut/v2.0/species_catalogue/MGYG0000017/MGYG000001792/genome/MGYG000001792.fna	0.209993	2	0.0191919	539.5	1077	2	1410000	1989682	828887	Human-Gut	1	0.18941	213	213	213	0	0	NA	3
./Mouse-Gut/ftp.ebi.ac.uk/pub/databases/metagenomics/mgnify_genomes/mouse-gut/v1.0/species_catalogue/MGYG0003256/MGYG000325610/genome/MGYG000325610.fna	0.210249	2	0.0192354	7943	11299	4587	1649440	1953350	1345530	Mouse-Gut	0	1	0	0	NA	0	0	NA	2
./Chicken-Gut/ftp.ebi.ac.uk/pub/databases/metagenomics/mgnify_genomes/chicken-gut/v1.0/species_catalogue/MGYG0003197/MGYG000319712/genome/MGYG000319712.fna	0.210832	2	0.0193349	55086	104730	5442	1190000	1259676	1117849	Chicken-Gut	1	0.19009	36	36	36	0	0	NA	3
./Marine/ftp.ebi.ac.uk/pub/databases/metagenomics/mgnify_genomes/marine/v1.0/species_catalogue/MGYG0002972/MGYG000297213/genome/MGYG000297213.fna	0.211497	2	0.0194486	20399.5	27213	13586	729715	1263153	196277	Marine	1	0.190628	3	3	3	0	0	NA	3
./Human-Gut/pub/databases/metagenomics/mgnify_genomes/human-gut/v2.0/species_catalogue/MGYG0000021/MGYG000002168/genome/MGYG000002168.fna	0.211679	2	0.0194797	1185	2366	4	209818	350517	69118	Human-Gut	3	0.0013499	109.333	168	68	0	0	NA	5
./Human-Gut/pub/databases/metagenomics/mgnify_genomes/human-gut/v2.0/species_catalogue/MGYG0000023/MGYG000002304/genome/MGYG000002304.fna	0.212568	2	0.0196323	168628	321164	16093	26093.5	32584	19603	Human-Gut	1	0.191495	4	4	4	13	13	13	3
./Mouse-Gut/ftp.ebi.ac.uk/pub/databases/metagenomics/mgnify_genomes/mouse-gut/v1.0/species_catalogue/MGYG0003299/MGYG000329907/genome/MGYG000329907.fna	0.213988	2	0.0198771	47	91	3	1140000	1866907	411188	Mouse-Gut	0	1	0	0	NA	0	0	NA	2
./Mouse-Gut/ftp.ebi.ac.uk/pub/databases/metagenomics/mgnify_genomes/mouse-gut/v1.0/species_catalogue/MGYG0003222/MGYG000322235/genome/MGYG000322235.fna	0.214905	2	0.0200356	31820	47858	15782	33910.5	47631	20190	Mouse-Gut	0	1	0	0	NA	0	0	NA	2
./Mouse-Gut/ftp.ebi.ac.uk/pub/databases/metagenomics/mgnify_genomes/mouse-gut/v1.0/species_catalogue/MGYG0003570/MGYG000357081/genome/MGYG000357081.fna	0.215028	2	0.0200571	32.5	37	28	40098.5	66116	14081	Mouse-Gut	5	3.20389e-06	59.8	71	44	95.5	112	79	7
./Cow-Rumen/ftp.ebi.ac.uk/pub/databases/metagenomics/mgnify_genomes/cow-rumen/v1.0/species_catalogue/MGYG0002900/MGYG000290062/genome/MGYG000290062.fna	0.2168	2	0.0203653	6236.5	10140	2333	177532	211209	143854	Cow-Rumen	0	1	0	0	NA	0	0	NA	2
./Marine/ftp.ebi.ac.uk/pub/databases/metagenomics/mgnify_genomes/marine/v1.0/species_catalogue/MGYG0002960/MGYG000296082/genome/MGYG000296082.fna	0.218566	2	0.0206744	20.5	22	19	837186	1309258	365115	Marine	4	7.98837e-05	323.25	528	158	0	0	NA	6
./Human-Gut/pub/databases/metagenomics/mgnify_genomes/human-gut/v2.0/species_catalogue/MGYG0000034/MGYG000003483/genome/MGYG000003483.fna	0.21958	2	0.0208529	8	9	7	200610	235167	166053	Human-Gut	1	0.197144	65	65	65	0	0	NA	3
./Human-Gut/pub/databases/metagenomics/mgnify_genomes/human-gut/v2.0/species_catalogue/MGYG0000015/MGYG000001534/genome/MGYG000001534.fna	0.219919	2	0.0209127	3217	6305	129	1448380	2890455	6305	Human-Gut	0	1	0	0	NA	0	0	NA	2
./Human-Gut/pub/databases/metagenomics/mgnify_genomes/human-gut/v2.0/species_catalogue/MGYG0000029/MGYG000002953/genome/MGYG000002953.fna	0.220794	2	0.0210675	22.5	35	10	1110000	1486262	727013	Human-Gut	2	0.0210675	117.5	121	114	0	0	NA	4
./Non-Model-Fish-Gut/ftp.ebi.ac.uk/pub/databases/metagenomics/mgnify_genomes/non-model-fish-gut/v2.0/species_catalogue/MGYG0002996/MGYG000299673/genome/MGYG000299673.fna	0.22135	2	0.021166	35.5	36	35	285522	412779	158266	Non-Model-Fish-Gut	11	1.33227e-15	53.2727	98	2	0	0	NA	13
./Marine/ftp.ebi.ac.uk/pub/databases/metagenomics/mgnify_genomes/marine/v1.0/species_catalogue/MGYG0002973/MGYG000297361/genome/MGYG000297361.fna	0.22161	2	0.021212	148	291	5	13546	17060	10032	Marine	2	0.021212	50	79	21	0	0	NA	4
./Mouse-Gut/ftp.ebi.ac.uk/pub/databases/metagenomics/mgnify_genomes/mouse-gut/v1.0/species_catalogue/MGYG0003227/MGYG000322713/genome/MGYG000322713.fna	0.221765	2	0.0212396	97613.5	195198	29	889701	1779374	28	Mouse-Gut	2	0.0212396	38.5	71	6	20.5	37	4	4
./Mouse-Gut/ftp.ebi.ac.uk/pub/databases/metagenomics/mgnify_genomes/mouse-gut/v1.0/species_catalogue/MGYG0003234/MGYG000323430/genome/MGYG000323430.fna	0.224516	2	0.0217308	1958.5	3512	405	1050641	1097668	1003614	Mouse-Gut	0	1	0	0	NA	0	0	NA	2
./Human-Gut/pub/databases/metagenomics/mgnify_genomes/human-gut/v2.0/species_catalogue/MGYG0000000/MGYG000000092/genome/MGYG000000092.fna	0.224948	2	0.0218083	474572	683924	265219	566870	1033807	99932	Human-Gut	0	1	0	0	NA	0	0	NA	2
./Mouse-Gut/ftp.ebi.ac.uk/pub/databases/metagenomics/mgnify_genomes/mouse-gut/v1.0/species_catalogue/MGYG0003226/MGYG000322651/genome/MGYG000322651.fna	0.227147	2	0.0222048	2620	3899	1341	16.5	24	9	Mouse-Gut	6	1.57083e-07	31.1667	76	5	591.5	1419	68	8
./Chicken-Gut/ftp.ebi.ac.uk/pub/databases/metagenomics/mgnify_genomes/chicken-gut/v1.0/species_catalogue/MGYG0003148/MGYG000314807/genome/MGYG000314807.fna	0.230254	2	0.0227702	6912.5	10906	2919	969355	1935791	2919	Chicken-Gut	0	1	0	0	NA	0	0	NA	2
./Pig-Gut/ftp.ebi.ac.uk/pub/databases/metagenomics/mgnify_genomes/pig-gut/v1.0/species_catalogue/MGYG0003016/MGYG000301603/genome/MGYG000301603.fna	0.231391	2	0.0229785	4599	9195	3	1504642	2315177	694107	Pig-Gut	0	1	0	0	NA	0	0	NA	2
./Mouse-Gut/ftp.ebi.ac.uk/pub/databases/metagenomics/mgnify_genomes/mouse-gut/v1.0/species_catalogue/MGYG0004099/MGYG000409998/genome/MGYG000409998.fna	0.234483	2	0.0235491	10805	21606	4	1350000	1618286	1075637	Mouse-Gut	0	1	0	0	NA	0	0	NA	2
./Mouse-Gut/ftp.ebi.ac.uk/pub/databases/metagenomics/mgnify_genomes/mouse-gut/v1.0/species_catalogue/MGYG0003226/MGYG000322645/genome/MGYG000322645.fna	0.23469	2	0.0235875	26022	32859	19185	53866.5	104174	3559	Mouse-Gut	1	0.209184	8	8	8	100	100	100	3
./Mouse-Gut/ftp.ebi.ac.uk/pub/databases/metagenomics/mgnify_genomes/mouse-gut/v1.0/species_catalogue/MGYG0004100/MGYG000410031/genome/MGYG000410031.fna	0.235704	2	0.0237759	5621.5	11187	56	1510017	1510716	1509318	Mouse-Gut	1	0.209985	61	61	61	0	0	NA	3
./Honeybee-Gut/ftp.ebi.ac.uk/pub/databases/metagenomics/mgnify_genomes/honeybee-gut/v1.0/species_catalogue/MGYG0003211/MGYG000321126/genome/MGYG000321126.fna	0.23679	2	0.0239785	6223	10570	1876	1680000	2286471	1081620	Honeybee-Gut	0	1	0	0	NA	0	0	NA	2
./Zebrafish-Fecal/ftp.ebi.ac.uk/pub/databases/metagenomics/mgnify_genomes/zebrafish-fecal/v1.0/species_catalogue/MGYG0002993/MGYG000299376/genome/MGYG000299376.fna	0.240123	2	0.0246047	42011.5	43290	40733	1665807	1989086	1342528	Zebrafish-Gut	1	0.213469	66	66	66	0	0	NA	3
./Human-Gut/pub/databases/metagenomics/mgnify_genomes/human-gut/v2.0/species_catalogue/MGYG0000031/MGYG000003192/genome/MGYG000003192.fna	0.240278	2	0.0246339	17.5	18	17	872051	1742063	2039	Human-Gut	6	2.1762e-07	89	175	30	0	0	NA	8
./Chicken-Gut/ftp.ebi.ac.uk/pub/databases/metagenomics/mgnify_genomes/chicken-gut/v1.0/species_catalogue/MGYG0003201/MGYG000320193/genome/MGYG000320193.fna	0.240468	2	0.0246699	104288	117100	91475	1266884	2394576	139192	Chicken-Gut	1	0.21374	23	23	23	0	0	NA	3
./Mouse-Gut/ftp.ebi.ac.uk/pub/databases/metagenomics/mgnify_genomes/mouse-gut/v1.0/species_catalogue/MGYG0003227/MGYG000322757/genome/MGYG000322757.fna	0.241205	2	0.0248094	86	135	37	134986	157984	111989	Mouse-Gut	2	0.0248094	49.5	52	47	1469.5	1486	1453	4
./Marine/ftp.ebi.ac.uk/pub/databases/metagenomics/mgnify_genomes/marine/v1.0/species_catalogue/MGYG0002967/MGYG000296739/genome/MGYG000296739.fna	0.242126	2	0.0249841	18	29	7	357626	498374	216878	Marine	4	0.000118079	293.75	374	87	0	0	NA	6
./Chicken-Gut/ftp.ebi.ac.uk/pub/databases/metagenomics/mgnify_genomes/chicken-gut/v1.0/species_catalogue/MGYG0003096/MGYG000309678/genome/MGYG000309678.fna	0.242171	2	0.0249926	7662	7751	7573	698848	986189	411506	Chicken-Gut	0	1	0	0	NA	0	0	NA	2
./Human-Gut/pub/databases/metagenomics/mgnify_genomes/human-gut/v2.0/species_catalogue/MGYG0000029/MGYG000002966/genome/MGYG000002966.fna	0.243379	2	0.0252228	6484	12925	43	1380000	2508388	243255	Human-Gut	0	1	0	0	NA	0	0	NA	2
./Chicken-Gut/ftp.ebi.ac.uk/pub/databases/metagenomics/mgnify_genomes/chicken-gut/v1.0/species_catalogue/MGYG0003101/MGYG000310161/genome/MGYG000310161.fna	0.246636	2	0.0258473	23944	26334	21554	695362	1369170	21554	Chicken-Gut	0	1	0	0	NA	0	0	NA	2
./Chicken-Gut/ftp.ebi.ac.uk/pub/databases/metagenomics/mgnify_genomes/chicken-gut/v1.0/species_catalogue/MGYG0003082/MGYG000308279/genome/MGYG000308279.fna	0.249	2	0.0263046	776	1517	35	1240000	2446019	27562	Chicken-Gut	1	0.22042	73	73	73	0	0	NA	3
./Mouse-Gut/ftp.ebi.ac.uk/pub/databases/metagenomics/mgnify_genomes/mouse-gut/v1.0/species_catalogue/MGYG0003243/MGYG000324300/genome/MGYG000324300.fna	0.25152	2	0.0267957	5451.5	10869	34	728988	764952	693024	Mouse-Gut	0	1	0	0	NA	0	0	NA	2
./Mouse-Gut/ftp.ebi.ac.uk/pub/databases/metagenomics/mgnify_genomes/mouse-gut/v1.0/species_catalogue/MGYG0003217/MGYG000321747/genome/MGYG000321747.fna	0.258132	2	0.0281016	136030	261777	10282	67637.5	81014	54261	Mouse-Gut	1	0.227507	3	3	3	26	26	26	3
./Non-Model-Fish-Gut/ftp.ebi.ac.uk/pub/databases/metagenomics/mgnify_genomes/non-model-fish-gut/v2.0/species_catalogue/MGYG0002995/MGYG000299586/genome/MGYG000299586.fna	0.259792	2	0.0284334	159584	160354	158813	1800000	3374741	227548	Non-Model-Fish-Gut	0	1	0	0	NA	0	0	NA	2
./Human-Gut/pub/databases/metagenomics/mgnify_genomes/human-gut/v2.0/species_catalogue/MGYG0000015/MGYG000001551/genome/MGYG000001551.fna	0.262884	2	0.0290556	1320000	2383934	249981	504191	758401	249981	Human-Gut	0	1	0	0	NA	0	0	NA	2
./Mouse-Gut/ftp.ebi.ac.uk/pub/databases/metagenomics/mgnify_genomes/mouse-gut/v1.0/species_catalogue/MGYG0003274/MGYG000327499/genome/MGYG000327499.fna	0.263445	2	0.029169	27	44	10	381390	411341	351439	Mouse-Gut	1	0.2316	183	183	183	0	0	NA	3
./Pig-Gut/ftp.ebi.ac.uk/pub/databases/metagenomics/mgnify_genomes/pig-gut/v1.0/species_catalogue/MGYG0003009/MGYG000300984/genome/MGYG000300984.fna	0.266872	2	0.0298661	9476.5	18803	150	1430000	1966511	893218	Pig-Gut	2	0.0298661	42	42	42	0	0	NA	4
./Human-Gut/pub/databases/metagenomics/mgnify_genomes/human-gut/v2.0/species_catalogue/MGYG0000006/MGYG000000666/genome/MGYG000000666.fna	0.269334	2	0.030371	6722	10632	2812	1584247	1997012	1171482	Human-Gut	2	0.030371	46.5	88	5	0	0	NA	4
./Mouse-Gut/ftp.ebi.ac.uk/pub/databases/metagenomics/mgnify_genomes/mouse-gut/v1.0/species_catalogue/MGYG0003223/MGYG000322333/genome/MGYG000322333.fna	0.273043	2	0.0311379	25111.5	45715	4508	265740	372686	158793	Mouse-Gut	1	0.23894	3	3	3	100	100	100	3
./Mouse-Gut/ftp.ebi.ac.uk/pub/databases/metagenomics/mgnify_genomes/mouse-gut/v1.0/species_catalogue/MGYG0003293/MGYG000329322/genome/MGYG000329322.fna	0.27452	2	0.0314454	4489	8952	26	588781	950214	227348	Mouse-Gut	1	0.240063	32	32	32	0	0	NA	3
./Chicken-Gut/ftp.ebi.ac.uk/pub/databases/metagenomics/mgnify_genomes/chicken-gut/v1.0/species_catalogue/MGYG0003161/MGYG000316151/genome/MGYG000316151.fna	0.274558	2	0.0314534	64104	77046	51162	1403717	2226107	581327	Chicken-Gut	0	1	0	0	NA	0	0	NA	2
./Human-Gut/pub/databases/metagenomics/mgnify_genomes/human-gut/v2.0/species_catalogue/MGYG0000032/MGYG000003237/genome/MGYG000003237.fna	0.275214	2	0.0315902	8	9	7	1347989	2659737	36241	Human-Gut	2	0.0315902	70.5	78	63	0	0	NA	4
./Marine/ftp.ebi.ac.uk/pub/databases/metagenomics/mgnify_genomes/marine/v1.0/species_catalogue/MGYG0002969/MGYG000296909/genome/MGYG000296909.fna	0.275794	2	0.0317115	64	77	51	122709	208745	36673	Marine	0	1	0	0	NA	0	0	NA	2
./Mouse-Gut/ftp.ebi.ac.uk/pub/databases/metagenomics/mgnify_genomes/mouse-gut/v1.0/species_catalogue/MGYG0003292/MGYG000329254/genome/MGYG000329254.fna	0.276865	2	0.0319362	9938	13081	6795	1130000	1804939	462954	Mouse-Gut	1	0.241843	54	54	54	0	0	NA	3
./Human-Gut/pub/databases/metagenomics/mgnify_genomes/human-gut/v2.0/species_catalogue/MGYG0000044/MGYG000004461/genome/MGYG000004461.fna	0.277638	2	0.0320985	31766	34285	29247	1705106	2400643	1009569	Human-Gut	1	0.242429	15	15	15	0	0	NA	3
./Pig-Gut/ftp.ebi.ac.uk/pub/databases/metagenomics/mgnify_genomes/pig-gut/v1.0/species_catalogue/MGYG0003019/MGYG000301957/genome/MGYG000301957.fna	0.032698	1	0.0321692	25	25	25	117234	117234	117234	Pig-Gut	0	1	0	0	NA	0	0	NA	1
./Marine/ftp.ebi.ac.uk/pub/databases/metagenomics/mgnify_genomes/marine/v1.0/species_catalogue/MGYG0002972/MGYG000297249/genome/MGYG000297249.fna	0.280267	2	0.0326532	36.5	58	15	1081532	1851894	311170	Marine	3	0.00297799	463.667	818	196	0	0	NA	5
./Human-Gut/pub/databases/metagenomics/mgnify_genomes/human-gut/v2.0/species_catalogue/MGYG0000014/MGYG000001445/genome/MGYG000001445.fna	0.291285	2	0.0350192	485200	900911	69489	166046	262604	69489	Human-Gut	0	1	0	0	NA	0	0	NA	2
./Human-Gut/pub/databases/metagenomics/mgnify_genomes/human-gut/v2.0/species_catalogue/MGYG0000033/MGYG000003390/genome/MGYG000003390.fna	0.29534	2	0.0359063	35184.5	39065	31304	1860000	1921307	1796696	Human-Gut	0	1	0	0	NA	0	0	NA	2
./Marine/ftp.ebi.ac.uk/pub/databases/metagenomics/mgnify_genomes/marine/v1.0/species_catalogue/MGYG0002965/MGYG000296540/genome/MGYG000296540.fna	0.296106	2	0.0360748	4082.5	7822	343	1809701	2766042	853360	Marine	0	1	0	0	NA	0	0	NA	2
./Honeybee-Gut/ftp.ebi.ac.uk/pub/databases/metagenomics/mgnify_genomes/honeybee-gut/v1.0/species_catalogue/MGYG0003211/MGYG000321110/genome/MGYG000321110.fna	0.300019	2	0.0369405	32092.5	35976	28209	2150000	3861117	443448	Honeybee-Gut	0	1	0	0	NA	0	0	NA	2
./Mouse-Gut/ftp.ebi.ac.uk/pub/databases/metagenomics/mgnify_genomes/mouse-gut/v1.0/species_catalogue/MGYG0003274/MGYG000327453/genome/MGYG000327453.fna	0.301703	2	0.0373156	36	36	36	977852	1498010	457695	Mouse-Gut	0	1	0	0	NA	0	0	NA	2
./Mouse-Gut/ftp.ebi.ac.uk/pub/databases/metagenomics/mgnify_genomes/mouse-gut/v1.0/species_catalogue/MGYG0004066/MGYG000406686/genome/MGYG000406686.fna	0.308267	2	0.0387911	30860.5	43738	17983	2360000	4010545	717380	Mouse-Gut	0	1	0	0	NA	0	0	NA	2
./Human-Gut/pub/databases/metagenomics/mgnify_genomes/human-gut/v2.0/species_catalogue/MGYG0000030/MGYG000003008/genome/MGYG000003008.fna	0.0395952	1	0.0388215	41	41	41	602725	602725	602725	Human-Gut	0	1	0	0	NA	0	0	NA	1
./Human-Gut/pub/databases/metagenomics/mgnify_genomes/human-gut/v2.0/species_catalogue/MGYG0000028/MGYG000002842/genome/MGYG000002842.fna	0.0397489	1	0.0389693	2508	2508	2508	130336	130336	130336	Human-Gut	0	1	0	0	NA	0	0	NA	1
./Human-Gut/pub/databases/metagenomics/mgnify_genomes/human-gut/v2.0/species_catalogue/MGYG0000001/MGYG000000168/genome/MGYG000000168.fna	0.310311	2	0.0392553	59366	99910	18822	583478	606948	560009	Human-Gut	1	0.266781	21	21	21	13	13	13	3
./Mouse-Gut/ftp.ebi.ac.uk/pub/databases/metagenomics/mgnify_genomes/mouse-gut/v1.0/species_catalogue/MGYG0003244/MGYG000324409/genome/MGYG000324409.fna	0.0412579	1	0.0404183	41	41	41	313983	313983	313983	Mouse-Gut	0	1	0	0	NA	0	0	NA	1
./Human-Vaginal/ftp.ebi.ac.uk/pub/databases/metagenomics/mgnify_genomes/human-vaginal/v1.0/species_catalogue/MGYG0003037/MGYG000303709/genome/MGYG000303709.fna	0.0413666	1	0.0405227	14	14	14	321306	321306	321306	Human-Vaginal	1	0.0405227	17	17	17	0	0	NA	2
./Mouse-Gut/ftp.ebi.ac.uk/pub/databases/metagenomics/mgnify_genomes/mouse-gut/v1.0/species_catalogue/MGYG0003218/MGYG000321804/genome/MGYG000321804.fna	0.318556	2	0.0411483	211147	288832	133462	475940	785556	166323	Mouse-Gut	0	1	0	0	NA	0	0	NA	2
./Human-Gut/pub/databases/metagenomics/mgnify_genomes/human-gut/v2.0/species_catalogue/MGYG0000015/MGYG000001525/genome/MGYG000001525.fna	0.320085	2	0.041503	338210	676407	13	1242387	2075857	408917	Human-Gut	0	1	0	0	NA	0	0	NA	2
./Marine/ftp.ebi.ac.uk/pub/databases/metagenomics/mgnify_genomes/marine/v1.0/species_catalogue/MGYG0002960/MGYG000296057/genome/MGYG000296057.fna	0.0428631	1	0.0419575	53006	53006	53006	570943	570943	570943	Marine	0	1	0	0	NA	0	0	NA	1
./Chicken-Gut/ftp.ebi.ac.uk/pub/databases/metagenomics/mgnify_genomes/chicken-gut/v1.0/species_catalogue/MGYG0003159/MGYG000315996/genome/MGYG000315996.fna	0.0434515	1	0.042521	13771	13771	13771	593423	593423	593423	Chicken-Gut	0	1	0	0	NA	0	0	NA	1
./Human-Gut/pub/databases/metagenomics/mgnify_genomes/human-gut/v2.0/species_catalogue/MGYG0000028/MGYG000002829/genome/MGYG000002829.fna	0.326491	2	0.0430019	12950	15324	10576	2220000	3440852	1007487	Human-Gut	1	0.278549	23	23	23	0	0	NA	3
./Human-Vaginal/ftp.ebi.ac.uk/pub/databases/metagenomics/mgnify_genomes/human-vaginal/v1.0/species_catalogue/MGYG0003040/MGYG000304013/genome/MGYG000304013.fna	0.0444636	1	0.0434896	3485	3485	3485	10090	10090	10090	Human-Vaginal	2	0.000959686	24	24	24	0	0	NA	3
./Human-Gut/pub/databases/metagenomics/mgnify_genomes/human-gut/v2.0/species_catalogue/MGYG0000018/MGYG000001845/genome/MGYG000001845.fna	0.0444893	1	0.0435142	2	2	2	727175	727175	727175	Human-Gut	0	1	0	0	NA	0	0	NA	1
./Human-Gut/pub/databases/metagenomics/mgnify_genomes/human-gut/v2.0/species_catalogue/MGYG0000033/MGYG000003359/genome/MGYG000003359.fna	0.340969	2	0.0464625	120706	241388	24	2020000	2330119	1717514	Human-Gut	2	0.0464625	28.5	30	27	0	0	NA	4
./Mouse-Gut/ftp.ebi.ac.uk/pub/databases/metagenomics/mgnify_genomes/mouse-gut/v1.0/species_catalogue/MGYG0003354/MGYG000335492/genome/MGYG000335492.fna	0.0476725	1	0.046554	24	24	24	6276	6276	6276	Mouse-Gut	3	1.74238e-05	5	7	3	24	49	10	4
./Marine/ftp.ebi.ac.uk/pub/databases/metagenomics/mgnify_genomes/marine/v1.0/species_catalogue/MGYG0002961/MGYG000296158/genome/MGYG000296158.fna	0.0482963	1	0.0471486	10	10	10	10	10	10	Marine	1	0.0471486	32	32	32	0	0	NA	2
./Human-Gut/pub/databases/metagenomics/mgnify_genomes/human-gut/v2.0/species_catalogue/MGYG0000000/MGYG000000066/genome/MGYG000000066.fna	0.350405	2	0.0487709	39267	71692	6842	105938	121989	89887	Human-Gut	0	1	0	0	NA	0	0	NA	2
./Human-Gut/pub/databases/metagenomics/mgnify_genomes/human-gut/v2.0/species_catalogue/MGYG0000015/MGYG000001514/genome/MGYG000001514.fna	0.353096	2	0.049437	1927625	3044188	811062	1490492	2369790	611194	Human-Gut	0	1	0	0	NA	0	0	NA	2
./Human-Gut/pub/databases/metagenomics/mgnify_genomes/human-gut/v2.0/species_catalogue/MGYG0000037/MGYG000003720/genome/MGYG000003720.fna	0.0508386	1	0.049568	1	1	1	51155	51155	51155	Human-Gut	0	1	0	0	NA	0	0	NA	1
./Mouse-Gut/ftp.ebi.ac.uk/pub/databases/metagenomics/mgnify_genomes/mouse-gut/v1.0/species_catalogue/MGYG0004037/MGYG000403771/genome/MGYG000403771.fna	0.0509514	1	0.0496752	18452	18452	18452	470206	470206	470206	Mouse-Gut	0	1	0	0	NA	0	0	NA	1
./Human-Gut/pub/databases/metagenomics/mgnify_genomes/human-gut/v2.0/species_catalogue/MGYG0000031/MGYG000003110/genome/MGYG000003110.fna	0.0521106	1	0.0507761	2	2	2	280967	280967	280967	Human-Gut	0	1	0	0	NA	0	0	NA	1
./Human-Gut/pub/databases/metagenomics/mgnify_genomes/human-gut/v2.0/species_catalogue/MGYG0000037/MGYG000003701/genome/MGYG000003701.fna	0.362677	2	0.0518341	261198	341017	181378	103121	181045	25197	Human-Gut	0	1	0	0	NA	0	0	NA	2
./Mouse-Gut/ftp.ebi.ac.uk/pub/databases/metagenomics/mgnify_genomes/mouse-gut/v1.0/species_catalogue/MGYG0003301/MGYG000330192/genome/MGYG000330192.fna	0.362726	2	0.0518466	80305	160585	25	2655818	4273325	1038311	Mouse-Gut	0	1	0	0	NA	0	0	NA	2
./Pig-Gut/ftp.ebi.ac.uk/pub/databases/metagenomics/mgnify_genomes/pig-gut/v1.0/species_catalogue/MGYG0003023/MGYG000302363/genome/MGYG000302363.fna	0.0534002	1	0.0519994	26	26	26	394025	394025	394025	Pig-Gut	0	1	0	0	NA	0	0	NA	1
./Human-Gut/pub/databases/metagenomics/mgnify_genomes/human-gut/v2.0/species_catalogue/MGYG0000035/MGYG000003580/genome/MGYG000003580.fna	0.0537879	1	0.052367	21	21	21	565552	565552	565552	Human-Gut	1	0.052367	2	2	2	0	0	NA	2
./Mouse-Gut/ftp.ebi.ac.uk/pub/databases/metagenomics/mgnify_genomes/mouse-gut/v1.0/species_catalogue/MGYG0003311/MGYG000331157/genome/MGYG000331157.fna	0.0559493	1	0.054413	34	34	34	477791	477791	477791	Mouse-Gut	0	1	0	0	NA	0	0	NA	1
./Human-Gut/pub/databases/metagenomics/mgnify_genomes/human-gut/v2.0/species_catalogue/MGYG0000039/MGYG000003951/genome/MGYG000003951.fna	0.0559848	1	0.0544465	2428	2428	2428	379244	379244	379244	Human-Gut	0	1	0	0	NA	0	0	NA	1
./Mouse-Gut/ftp.ebi.ac.uk/pub/databases/metagenomics/mgnify_genomes/mouse-gut/v1.0/species_catalogue/MGYG0003272/MGYG000327200/genome/MGYG000327200.fna	0.0560794	1	0.0545359	36	36	36	202717	202717	202717	Mouse-Gut	1	0.0545359	3	3	3	0	0	NA	2
./Chicken-Gut/ftp.ebi.ac.uk/pub/databases/metagenomics/mgnify_genomes/chicken-gut/v1.0/species_catalogue/MGYG0003163/MGYG000316368/genome/MGYG000316368.fna	0.0564306	1	0.054868	7528	7528	7528	896516	896516	896516	Chicken-Gut	0	1	0	0	NA	0	0	NA	1
./Mouse-Gut/ftp.ebi.ac.uk/pub/databases/metagenomics/mgnify_genomes/mouse-gut/v1.0/species_catalogue/MGYG0003268/MGYG000326891/genome/MGYG000326891.fna	0.0566613	1	0.055086	15	15	15	28629	28629	28629	Mouse-Gut	1	0.0550859	14	14	14	0	0	NA	2
./Human-Gut/pub/databases/metagenomics/mgnify_genomes/human-gut/v2.0/species_catalogue/MGYG0000014/MGYG000001436/genome/MGYG000001436.fna	0.379261	2	0.0560793	1276654	2411743	141565	203532	377553	29510	Human-Gut	0	1	0	0	NA	0	0	NA	2
./Mouse-Gut/ftp.ebi.ac.uk/pub/databases/metagenomics/mgnify_genomes/mouse-gut/v1.0/species_catalogue/MGYG0003226/MGYG000322633/genome/MGYG000322633.fna	0.381637	2	0.0566973	102102	178069	26134	791870	913914	669825	Mouse-Gut	0	1	0	0	NA	0	0	NA	2
./Marine/ftp.ebi.ac.uk/pub/databases/metagenomics/mgnify_genomes/marine/v1.0/species_catalogue/MGYG0002966/MGYG000296698/genome/MGYG000296698.fna	0.0600002	1	0.0582356	5	5	5	372879	372879	372879	Marine	0	1	0	0	NA	0	0	NA	1
./Human-Gut/pub/databases/metagenomics/mgnify_genomes/human-gut/v2.0/species_catalogue/MGYG0000037/MGYG000003772/genome/MGYG000003772.fna	0.0607938	1	0.0589828	12	12	12	5228	5228	5228	Human-Gut	1	0.0589828	103	103	103	0	0	NA	2
./Pig-Gut/ftp.ebi.ac.uk/pub/databases/metagenomics/mgnify_genomes/pig-gut/v1.0/species_catalogue/MGYG0003021/MGYG000302140/genome/MGYG000302140.fna	0.0620708	1	0.0601836	10	10	10	358424	358424	358424	Pig-Gut	1	0.0601836	214	214	214	0	0	NA	2
./Human-Oral/ftp.ebi.ac.uk/pub/databases/metagenomics/mgnify_genomes/human-oral/v1.0/species_catalogue/MGYG0002990/MGYG000299001/genome/MGYG000299001.fna	0.0623571	1	0.0604527	2461	2461	2461	401830	401830	401830	Human-Oral	0	1	0	0	NA	0	0	NA	1
./Marine/ftp.ebi.ac.uk/pub/databases/metagenomics/mgnify_genomes/marine/v1.0/species_catalogue/MGYG0002963/MGYG000296342/genome/MGYG000296342.fna	0.0623592	1	0.0604547	148	148	148	227083	227083	227083	Marine	0	1	0	0	NA	0	0	NA	1
./Human-Gut/pub/databases/metagenomics/mgnify_genomes/human-gut/v2.0/species_catalogue/MGYG0000033/MGYG000003304/genome/MGYG000003304.fna	0.062739	1	0.0608114	2	2	2	253151	253151	253151	Human-Gut	0	1	0	0	NA	0	0	NA	1
./Human-Gut/pub/databases/metagenomics/mgnify_genomes/human-gut/v2.0/species_catalogue/MGYG0000037/MGYG000003725/genome/MGYG000003725.fna	0.0627657	1	0.0608365	12	12	12	49767	49767	49767	Human-Gut	4	6.15025e-07	12.25	21	5	0	0	NA	5
./Human-Gut/pub/databases/metagenomics/mgnify_genomes/human-gut/v2.0/species_catalogue/MGYG0000045/MGYG000004546/genome/MGYG000004546.fna	0.0629227	1	0.0609839	1	1	1	53442	53442	53442	Human-Gut	0	1	0	0	NA	0	0	NA	1
./Human-Gut/pub/databases/metagenomics/mgnify_genomes/human-gut/v2.0/species_catalogue/MGYG0000028/MGYG000002826/genome/MGYG000002826.fna	0.0633273	1	0.0613637	495	495	495	399129	399129	399129	Human-Gut	0	1	0	0	NA	0	0	NA	1
./Human-Gut/pub/databases/metagenomics/mgnify_genomes/human-gut/v2.0/species_catalogue/MGYG0000037/MGYG000003755/genome/MGYG000003755.fna	0.0637391	1	0.0617502	5	5	5	797350	797350	797350	Human-Gut	1	0.0617502	51	51	51	0	0	NA	2
./Marine/ftp.ebi.ac.uk/pub/databases/metagenomics/mgnify_genomes/marine/v1.0/species_catalogue/MGYG0002966/MGYG000296685/genome/MGYG000296685.fna	0.0645624	1	0.0625224	20448	20448	20448	623838	623838	623838	Marine	0	1	0	0	NA	0	0	NA	1
./Marine/ftp.ebi.ac.uk/pub/databases/metagenomics/mgnify_genomes/marine/v1.0/species_catalogue/MGYG0002967/MGYG000296765/genome/MGYG000296765.fna	0.0648875	1	0.0628271	8354	8354	8354	580832	580832	580832	Marine	0	1	0	0	NA	0	0	NA	1
./Marine/ftp.ebi.ac.uk/pub/databases/metagenomics/mgnify_genomes/marine/v1.0/species_catalogue/MGYG0002969/MGYG000296946/genome/MGYG000296946.fna	0.0650349	1	0.0629652	42	42	42	97620	97620	97620	Marine	1	0.0629652	261	261	261	0	0	NA	2
./Cow-Rumen/ftp.ebi.ac.uk/pub/databases/metagenomics/mgnify_genomes/cow-rumen/v1.0/species_catalogue/MGYG0002927/MGYG000292733/genome/MGYG000292733.fna	0.0651715	1	0.0630932	15592	15592	15592	501446	501446	501446	Cow-Rumen	0	1	0	0	NA	0	0	NA	1
./Pig-Gut/ftp.ebi.ac.uk/pub/databases/metagenomics/mgnify_genomes/pig-gut/v1.0/species_catalogue/MGYG0003019/MGYG000301994/genome/MGYG000301994.fna	0.0655136	1	0.0634137	11	11	11	488070	488070	488070	Pig-Gut	3	4.4621e-05	101.667	155	14	0	0	NA	4
./Human-Gut/pub/databases/metagenomics/mgnify_genomes/human-gut/v2.0/species_catalogue/MGYG0000033/MGYG000003398.1/genome/MGYG000003398.1.fna	0.0661949	1	0.0640516	22	22	22	43787	43787	43787	Human-Gut	0	1	0	0	NA	0	0	NA	1
./Human-Oral/ftp.ebi.ac.uk/pub/databases/metagenomics/mgnify_genomes/human-oral/v1.0/species_catalogue/MGYG0002983/MGYG000298394/genome/MGYG000298394.fna	0.0664495	1	0.0642898	1517	1517	1517	575869	575869	575869	Human-Oral	3	4.65281e-05	69	136	27	0	0	NA	4
./Human-Gut/pub/databases/metagenomics/mgnify_genomes/human-gut/v2.0/species_catalogue/MGYG0000046/MGYG000004648/genome/MGYG000004648.fna	0.0665693	1	0.0644019	66	66	66	760371	760371	760371	Human-Gut	1	0.0644019	195	195	195	0	0	NA	2
./Human-Oral/ftp.ebi.ac.uk/pub/databases/metagenomics/mgnify_genomes/human-oral/v1.0/species_catalogue/MGYG0002990/MGYG000299042/genome/MGYG000299042.fna	0.0670991	1	0.0648975	2523	2523	2523	1050896	1050896	1050896	Human-Oral	0	1	0	0	NA	0	0	NA	1
./Pig-Gut/ftp.ebi.ac.uk/pub/databases/metagenomics/mgnify_genomes/pig-gut/v1.0/species_catalogue/MGYG0003036/MGYG000303603/genome/MGYG000303603.fna	0.068125	1	0.0658563	12746	12746	12746	776478	776478	776478	Pig-Gut	0	1	0	0	NA	0	0	NA	1
./Pig-Gut/ftp.ebi.ac.uk/pub/databases/metagenomics/mgnify_genomes/pig-gut/v1.0/species_catalogue/MGYG0003016/MGYG000301696/genome/MGYG000301696.fna	0.0684428	1	0.0661531	21	21	21	129715	129715	129715	Pig-Gut	0	1	0	0	NA	0	0	NA	1
./Cow-Rumen/ftp.ebi.ac.uk/pub/databases/metagenomics/mgnify_genomes/cow-rumen/v1.0/species_catalogue/MGYG0002920/MGYG000292009/genome/MGYG000292009.fna	0.0687089	1	0.0664016	9808	9808	9808	574415	574415	574415	Cow-Rumen	1	0.0664016	39	39	39	0	0	NA	2
./Human-Gut/pub/databases/metagenomics/mgnify_genomes/human-gut/v2.0/species_catalogue/MGYG0000039/MGYG000003976/genome/MGYG000003976.fna	0.0687185	1	0.0664105	1	1	1	229418	229418	229418	Human-Gut	0	1	0	0	NA	0	0	NA	1
./Human-Gut/pub/databases/metagenomics/mgnify_genomes/human-gut/v2.0/species_catalogue/MGYG0000016/MGYG000001676/genome/MGYG000001676.fna	0.0687261	1	0.0664177	21	21	21	435255	435255	435255	Human-Gut	0	1	0	0	NA	0	0	NA	1
./Zebrafish-Fecal/ftp.ebi.ac.uk/pub/databases/metagenomics/mgnify_genomes/zebrafish-fecal/v1.0/species_catalogue/MGYG0002993/MGYG000299359/genome/MGYG000299359.fna	0.0687687	1	0.0664574	4263	4263	4263	741818	741818	741818	Zebrafish-Gut	0	1	0	0	NA	0	0	NA	1
./Marine/ftp.ebi.ac.uk/pub/databases/metagenomics/mgnify_genomes/marine/v1.0/species_catalogue/MGYG0002963/MGYG000296390/genome/MGYG000296390.fna	0.0690159	1	0.0666881	1438	1438	1438	88390	88390	88390	Marine	0	1	0	0	NA	0	0	NA	1
./Human-Gut/pub/databases/metagenomics/mgnify_genomes/human-gut/v2.0/species_catalogue/MGYG0000028/MGYG000002896/genome/MGYG000002896.fna	0.0691702	1	0.0668321	3	3	3	63788	63788	63788	Human-Gut	0	1	0	0	NA	0	0	NA	1
./Honeybee-Gut/ftp.ebi.ac.uk/pub/databases/metagenomics/mgnify_genomes/honeybee-gut/v1.0/species_catalogue/MGYG0003213/MGYG000321304/genome/MGYG000321304.fna	0.0693182	1	0.0669703	44	44	44	44484	44484	44484	Honeybee-Gut	0	1	0	0	NA	0	0	NA	1
./Human-Gut/pub/databases/metagenomics/mgnify_genomes/human-gut/v2.0/species_catalogue/MGYG0000018/MGYG000001844/genome/MGYG000001844.fna	0.0698	1	0.0674196	1017	1017	1017	131565	131565	131565	Human-Gut	0	1	0	0	NA	0	0	NA	1
./Human-Gut/pub/databases/metagenomics/mgnify_genomes/human-gut/v2.0/species_catalogue/MGYG0000017/MGYG000001743/genome/MGYG000001743.fna	0.07059	1	0.0681561	7	7	7	671079	671079	671079	Human-Gut	2	0.00237727	99.5	165	34	0	0	NA	3
./Human-Gut/pub/databases/metagenomics/mgnify_genomes/human-gut/v2.0/species_catalogue/MGYG0000020/MGYG000002017/genome/MGYG000002017.fna	0.0712259	1	0.0687485	3647	3647	3647	845840	845840	845840	Human-Gut	0	1	0	0	NA	0	0	NA	1
./Honeybee-Gut/ftp.ebi.ac.uk/pub/databases/metagenomics/mgnify_genomes/honeybee-gut/v1.0/species_catalogue/MGYG0003213/MGYG000321324/genome/MGYG000321324.fna	0.0720254	1	0.0694927	44	44	44	820372	820372	820372	Honeybee-Gut	1	0.0694927	217	217	217	0	0	NA	2
./Pig-Gut/ftp.ebi.ac.uk/pub/databases/metagenomics/mgnify_genomes/pig-gut/v1.0/species_catalogue/MGYG0003017/MGYG000301738/genome/MGYG000301738.fna	0.0727444	1	0.0701615	7	7	7	96662	96662	96662	Pig-Gut	0	1	0	0	NA	0	0	NA	1
./Human-Gut/pub/databases/metagenomics/mgnify_genomes/human-gut/v2.0/species_catalogue/MGYG0000002/MGYG000000287/genome/MGYG000000287.fna	0.43194	2	0.0703154	7860	8117	7603	599598	886526	312671	Human-Gut	0	1	0	0	NA	0	0	NA	2
./Marine/ftp.ebi.ac.uk/pub/databases/metagenomics/mgnify_genomes/marine/v1.0/species_catalogue/MGYG0002964/MGYG000296445/genome/MGYG000296445.fna	0.0730974	1	0.0704897	18	18	18	651988	651988	651988	Marine	0	1	0	0	NA	0	0	NA	1
./Human-Gut/pub/databases/metagenomics/mgnify_genomes/human-gut/v2.0/species_catalogue/MGYG0000028/MGYG000002892/genome/MGYG000002892.fna	0.0732603	1	0.0706411	25	25	25	210481	210481	210481	Human-Gut	0	1	0	0	NA	0	0	NA	1
./Pig-Gut/ftp.ebi.ac.uk/pub/databases/metagenomics/mgnify_genomes/pig-gut/v1.0/species_catalogue/MGYG0003007/MGYG000300744/genome/MGYG000300744.fna	0.0739838	1	0.0713133	2264	2264	2264	37983	37983	37983	Pig-Gut	0	1	0	0	NA	0	0	NA	1
./Marine/ftp.ebi.ac.uk/pub/databases/metagenomics/mgnify_genomes/marine/v1.0/species_catalogue/MGYG0002968/MGYG000296801/genome/MGYG000296801.fna	0.0740644	1	0.0713881	11713	11713	11713	451812	451812	451812	Marine	0	1	0	0	NA	0	0	NA	1
./Human-Gut/pub/databases/metagenomics/mgnify_genomes/human-gut/v2.0/species_catalogue/MGYG0000034/MGYG000003459/genome/MGYG000003459.fna	0.0743489	1	0.0716522	9	9	9	29209	29209	29209	Human-Gut	1	0.0716522	17	17	17	0	0	NA	2
./Human-Gut/pub/databases/metagenomics/mgnify_genomes/human-gut/v2.0/species_catalogue/MGYG0000037/MGYG000003719/genome/MGYG000003719.fna	0.0749645	1	0.0722236	23067	23067	23067	654183	654183	654183	Human-Gut	0	1	0	0	NA	0	0	NA	1
./Human-Vaginal/ftp.ebi.ac.uk/pub/databases/metagenomics/mgnify_genomes/human-vaginal/v1.0/species_catalogue/MGYG0003040/MGYG000304012/genome/MGYG000304012.fna	0.0749868	1	0.0722443	26	26	26	109962	109962	109962	Human-Vaginal	0	1	0	0	NA	0	0	NA	1
./Human-Gut/pub/databases/metagenomics/mgnify_genomes/human-gut/v2.0/species_catalogue/MGYG0000046/MGYG000004653/genome/MGYG000004653.fna	0.0750486	1	0.0723016	4460	4460	4460	845219	845219	845219	Human-Gut	0	1	0	0	NA	0	0	NA	1
./Human-Gut/pub/databases/metagenomics/mgnify_genomes/human-gut/v2.0/species_catalogue/MGYG0000029/MGYG000002998/genome/MGYG000002998.fna	0.0751261	1	0.0723735	8	8	8	31486	31486	31486	Human-Gut	1	0.0723735	46	46	46	0	0	NA	2
./Pig-Gut/ftp.ebi.ac.uk/pub/databases/metagenomics/mgnify_genomes/pig-gut/v1.0/species_catalogue/MGYG0002998/MGYG000299884/genome/MGYG000299884.fna	0.0751434	1	0.0723895	6178	6178	6178	1182515	1182515	1182515	Pig-Gut	0	1	0	0	NA	0	0	NA	1
./Human-Oral/ftp.ebi.ac.uk/pub/databases/metagenomics/mgnify_genomes/human-oral/v1.0/species_catalogue/MGYG0002984/MGYG000298403/genome/MGYG000298403.fna	0.0753122	1	0.0725461	15437	15437	15437	58656	58656	58656	Human-Oral	0	1	0	0	NA	0	0	NA	1
./Marine/ftp.ebi.ac.uk/pub/databases/metagenomics/mgnify_genomes/marine/v1.0/species_catalogue/MGYG0002970/MGYG000297064/genome/MGYG000297064.fna	0.0753708	1	0.0726004	59	59	59	153120	153120	153120	Marine	1	0.0726004	254	254	254	0	0	NA	2
./Pig-Gut/ftp.ebi.ac.uk/pub/databases/metagenomics/mgnify_genomes/pig-gut/v1.0/species_catalogue/MGYG0003010/MGYG000301032/genome/MGYG000301032.fna	0.0756111	1	0.0728233	36	36	36	87463	87463	87463	Pig-Gut	0	1	0	0	NA	0	0	NA	1
./Marine/ftp.ebi.ac.uk/pub/databases/metagenomics/mgnify_genomes/marine/v1.0/species_catalogue/MGYG0002970/MGYG000297046/genome/MGYG000297046.fna	0.0762053	1	0.073374	1	1	1	570107	570107	570107	Marine	4	1.32217e-06	47.25	92	24	0	0	NA	5
./Human-Gut/pub/databases/metagenomics/mgnify_genomes/human-gut/v2.0/species_catalogue/MGYG0000037/MGYG000003758/genome/MGYG000003758.fna	0.0766475	1	0.0737837	13	13	13	807800	807800	807800	Human-Gut	0	1	0	0	NA	0	0	NA	1
./Human-Gut/pub/databases/metagenomics/mgnify_genomes/human-gut/v2.0/species_catalogue/MGYG0000009/MGYG000000952/genome/MGYG000000952.fna	0.076922	1	0.0740379	1	1	1	956533	956533	956533	Human-Gut	0	1	0	0	NA	0	0	NA	1
./Pig-Gut/ftp.ebi.ac.uk/pub/databases/metagenomics/mgnify_genomes/pig-gut/v1.0/species_catalogue/MGYG0003022/MGYG000302245/genome/MGYG000302245.fna	0.076982	1	0.0740935	1	1	1	938916	938916	938916	Pig-Gut	1	0.0740935	78	78	78	0	0	NA	2
./Pig-Gut/ftp.ebi.ac.uk/pub/databases/metagenomics/mgnify_genomes/pig-gut/v1.0/species_catalogue/MGYG0003029/MGYG000302991/genome/MGYG000302991.fna	0.0772154	1	0.0743096	1	1	1	343031	343031	343031	Pig-Gut	1	0.0743096	60	60	60	0	0	NA	2
./Mouse-Gut/ftp.ebi.ac.uk/pub/databases/metagenomics/mgnify_genomes/mouse-gut/v1.0/species_catalogue/MGYG0003229/MGYG000322996/genome/MGYG000322996.fna	0.0774664	1	0.0745419	38	38	38	737079	737079	737079	Mouse-Gut	0	1	0	0	NA	0	0	NA	1
./Human-Gut/pub/databases/metagenomics/mgnify_genomes/human-gut/v2.0/species_catalogue/MGYG0000018/MGYG000001808/genome/MGYG000001808.fna	0.0776594	1	0.0747204	3	3	3	783525	783525	783525	Human-Gut	0	1	0	0	NA	0	0	NA	1
./Pig-Gut/ftp.ebi.ac.uk/pub/databases/metagenomics/mgnify_genomes/pig-gut/v1.0/species_catalogue/MGYG0003021/MGYG000302179/genome/MGYG000302179.fna	0.0778778	1	0.0749226	1	1	1	416799	416799	416799	Pig-Gut	0	1	0	0	NA	0	0	NA	1
./Human-Oral/ftp.ebi.ac.uk/pub/databases/metagenomics/mgnify_genomes/human-oral/v1.0/species_catalogue/MGYG0002988/MGYG000298861/genome/MGYG000298861.fna	0.0781428	1	0.0751676	18177	18177	18177	1227923	1227923	1227923	Human-Oral	0	1	0	0	NA	0	0	NA	1
./Human-Gut/pub/databases/metagenomics/mgnify_genomes/human-gut/v2.0/species_catalogue/MGYG0000005/MGYG000000509/genome/MGYG000000509.fna	0.078445	1	0.0754471	1	1	1	132084	132084	132084	Human-Gut	2	0.00292054	13.5	20	7	0	0	NA	3
./Marine/ftp.ebi.ac.uk/pub/databases/metagenomics/mgnify_genomes/marine/v1.0/species_catalogue/MGYG0002968/MGYG000296841/genome/MGYG000296841.fna	0.0784916	1	0.0754902	22230	22230	22230	1038895	1038895	1038895	Marine	0	1	0	0	NA	0	0	NA	1
./Mouse-Gut/ftp.ebi.ac.uk/pub/databases/metagenomics/mgnify_genomes/mouse-gut/v1.0/species_catalogue/MGYG0003261/MGYG000326144/genome/MGYG000326144.fna	0.0785983	1	0.0755888	37	37	37	591794	591794	591794	Mouse-Gut	4	1.49337e-06	145.75	278	10	0	0	NA	5
./Human-Gut/pub/databases/metagenomics/mgnify_genomes/human-gut/v2.0/species_catalogue/MGYG0000048/MGYG000004814/genome/MGYG000004814.fna	0.0786808	1	0.0756651	576	576	576	23502	23502	23502	Human-Gut	0	1	0	0	NA	0	0	NA	1
./Marine/ftp.ebi.ac.uk/pub/databases/metagenomics/mgnify_genomes/marine/v1.0/species_catalogue/MGYG0002970/MGYG000297079/genome/MGYG000297079.fna	0.0795201	1	0.0764405	52	52	52	196124	196124	196124	Marine	0	1	0	0	NA	0	0	NA	1
./Cow-Rumen/ftp.ebi.ac.uk/pub/databases/metagenomics/mgnify_genomes/cow-rumen/v1.0/species_catalogue/MGYG0002907/MGYG000290731/genome/MGYG000290731.fna	0.0801293	1	0.077003	371	371	371	177492	177492	177492	Cow-Rumen	0	1	0	0	NA	0	0	NA	1
./Chicken-Gut/ftp.ebi.ac.uk/pub/databases/metagenomics/mgnify_genomes/chicken-gut/v1.0/species_catalogue/MGYG0003109/MGYG000310999/genome/MGYG000310999.fna	0.0801448	1	0.0770173	1	1	1	169166	169166	169166	Chicken-Gut	0	1	0	0	NA	0	0	NA	1
./Pig-Gut/ftp.ebi.ac.uk/pub/databases/metagenomics/mgnify_genomes/pig-gut/v1.0/species_catalogue/MGYG0003035/MGYG000303582/genome/MGYG000303582.fna	0.0802246	1	0.0770909	2733	2733	2733	411224	411224	411224	Pig-Gut	0	1	0	0	NA	0	0	NA	1
./Mouse-Gut/ftp.ebi.ac.uk/pub/databases/metagenomics/mgnify_genomes/mouse-gut/v1.0/species_catalogue/MGYG0003304/MGYG000330471/genome/MGYG000330471.fna	0.0802606	1	0.0771242	39	39	39	963706	963706	963706	Mouse-Gut	0	1	0	0	NA	0	0	NA	1
./Mouse-Gut/ftp.ebi.ac.uk/pub/databases/metagenomics/mgnify_genomes/mouse-gut/v1.0/species_catalogue/MGYG0004057/MGYG000405799/genome/MGYG000405799.fna	0.0805224	1	0.0773657	17	17	17	62714	62714	62714	Mouse-Gut	0	1	0	0	NA	0	0	NA	1
./Marine/ftp.ebi.ac.uk/pub/databases/metagenomics/mgnify_genomes/marine/v1.0/species_catalogue/MGYG0002965/MGYG000296519/genome/MGYG000296519.fna	0.0807567	1	0.0775819	20407	20407	20407	700433	700433	700433	Marine	0	1	0	0	NA	0	0	NA	1
./Cow-Rumen/ftp.ebi.ac.uk/pub/databases/metagenomics/mgnify_genomes/cow-rumen/v1.0/species_catalogue/MGYG0002920/MGYG000292082/genome/MGYG000292082.fna	0.0808008	1	0.0776226	216	216	216	88861	88861	88861	Cow-Rumen	0	1	0	0	NA	0	0	NA	1
./Marine/ftp.ebi.ac.uk/pub/databases/metagenomics/mgnify_genomes/marine/v1.0/species_catalogue/MGYG0002961/MGYG000296138/genome/MGYG000296138.fna	0.0808123	1	0.0776332	15	15	15	354217	354217	354217	Marine	0	1	0	0	NA	0	0	NA	1
./Mouse-Gut/ftp.ebi.ac.uk/pub/databases/metagenomics/mgnify_genomes/mouse-gut/v1.0/species_catalogue/MGYG0003306/MGYG000330691/genome/MGYG000330691.fna	0.0816481	1	0.0784037	29	29	29	362315	362315	362315	Mouse-Gut	5	2.82506e-08	82.2	130	18	0	0	NA	6
./Human-Gut/pub/databases/metagenomics/mgnify_genomes/human-gut/v2.0/species_catalogue/MGYG0000048/MGYG000004803/genome/MGYG000004803.fna	0.0822387	1	0.0789479	6042	6042	6042	1021741	1021741	1021741	Human-Gut	0	1	0	0	NA	0	0	NA	1
./Mouse-Gut/ftp.ebi.ac.uk/pub/databases/metagenomics/mgnify_genomes/mouse-gut/v1.0/species_catalogue/MGYG0003267/MGYG000326780/genome/MGYG000326780.fna	0.0827054	1	0.0793777	16	16	16	718648	718648	718648	Mouse-Gut	0	1	0	0	NA	0	0	NA	1
./Mouse-Gut/ftp.ebi.ac.uk/pub/databases/metagenomics/mgnify_genomes/mouse-gut/v1.0/species_catalogue/MGYG0003222/MGYG000322259/genome/MGYG000322259.fna	0.0827549	1	0.0794233	14727	14727	14727	107079	107079	107079	Mouse-Gut	0	1	0	0	NA	0	0	NA	1
./Cow-Rumen/ftp.ebi.ac.uk/pub/databases/metagenomics/mgnify_genomes/cow-rumen/v1.0/species_catalogue/MGYG0002942/MGYG000294289/genome/MGYG000294289.fna	0.0828723	1	0.0795313	2353	2353	2353	5855	5855	5855	Cow-Rumen	1	0.0795313	42	42	42	78	78	78	2
./Human-Gut/pub/databases/metagenomics/mgnify_genomes/human-gut/v2.0/species_catalogue/MGYG0000026/MGYG000002630/genome/MGYG000002630.fna	0.0831355	1	0.0797736	17	17	17	83896	83896	83896	Human-Gut	5	3.08812e-08	61.4	103	3	0	0	NA	6
./Mouse-Gut/ftp.ebi.ac.uk/pub/databases/metagenomics/mgnify_genomes/mouse-gut/v1.0/species_catalogue/MGYG0003254/MGYG000325460/genome/MGYG000325460.fna	0.083147	1	0.0797841	1670	1670	1670	709145	709145	709145	Mouse-Gut	0	1	0	0	NA	0	0	NA	1
./Human-Gut/pub/databases/metagenomics/mgnify_genomes/human-gut/v2.0/species_catalogue/MGYG0000035/MGYG000003518/genome/MGYG000003518.fna	0.083195	1	0.0798283	21	21	21	995947	995947	995947	Human-Gut	2	0.00327462	25.5	31	20	0	0	NA	3
./Chicken-Gut/ftp.ebi.ac.uk/pub/databases/metagenomics/mgnify_genomes/chicken-gut/v1.0/species_catalogue/MGYG0003183/MGYG000318391/genome/MGYG000318391.fna	0.0832747	1	0.0799017	6150	6150	6150	317468	317468	317468	Chicken-Gut	0	1	0	0	NA	0	0	NA	1
./Human-Gut/pub/databases/metagenomics/mgnify_genomes/human-gut/v2.0/species_catalogue/MGYG0000010/MGYG000001020/genome/MGYG000001020.fna	0.0834402	1	0.0800539	6	6	6	432425	432425	432425	Human-Gut	0	1	0	0	NA	0	0	NA	1
./Pig-Gut/ftp.ebi.ac.uk/pub/databases/metagenomics/mgnify_genomes/pig-gut/v1.0/species_catalogue/MGYG0003015/MGYG000301518/genome/MGYG000301518.fna	0.0834433	1	0.0800568	6	6	6	408490	408490	408490	Pig-Gut	0	1	0	0	NA	0	0	NA	1
./Mouse-Gut/ftp.ebi.ac.uk/pub/databases/metagenomics/mgnify_genomes/mouse-gut/v1.0/species_catalogue/MGYG0003291/MGYG000329191/genome/MGYG000329191.fna	0.0844436	1	0.0809765	11091	11091	11091	554663	554663	554663	Mouse-Gut	0	1	0	0	NA	0	0	NA	1
./Mouse-Gut/ftp.ebi.ac.uk/pub/databases/metagenomics/mgnify_genomes/mouse-gut/v1.0/species_catalogue/MGYG0003241/MGYG000324121/genome/MGYG000324121.fna	0.0847905	1	0.0812953	15	15	15	127716	127716	127716	Mouse-Gut	0	1	0	0	NA	0	0	NA	1
./Pig-Gut/ftp.ebi.ac.uk/pub/databases/metagenomics/mgnify_genomes/pig-gut/v1.0/species_catalogue/MGYG0003027/MGYG000302764/genome/MGYG000302764.fna	0.0849161	1	0.0814106	3507	3507	3507	155075	155075	155075	Pig-Gut	0	1	0	0	NA	0	0	NA	1
./Human-Gut/pub/databases/metagenomics/mgnify_genomes/human-gut/v2.0/species_catalogue/MGYG0000010/MGYG000001015/genome/MGYG000001015.fna	0.0849383	1	0.081431	1906	1906	1906	1177298	1177298	1177298	Human-Gut	0	1	0	0	NA	0	0	NA	1
./Human-Gut/pub/databases/metagenomics/mgnify_genomes/human-gut/v2.0/species_catalogue/MGYG0000045/MGYG000004566/genome/MGYG000004566.fna	0.0851075	1	0.0815865	2607	2607	2607	921072	921072	921072	Human-Gut	1	0.0815865	338	338	338	0	0	NA	2
./Human-Gut/pub/databases/metagenomics/mgnify_genomes/human-gut/v2.0/species_catalogue/MGYG0000026/MGYG000002624/genome/MGYG000002624.fna	0.0851429	1	0.0816189	68051	68051	68051	720758	720758	720758	Human-Gut	1	0.0816189	6	6	6	0	0	NA	2
./Human-Vaginal/ftp.ebi.ac.uk/pub/databases/metagenomics/mgnify_genomes/human-vaginal/v1.0/species_catalogue/MGYG0003040/MGYG000304014/genome/MGYG000304014.fna	0.0852986	1	0.0817619	36859	36859	36859	36859	36859	36859	Human-Vaginal	0	1	0	0	NA	0	0	NA	1
./Human-Gut/pub/databases/metagenomics/mgnify_genomes/human-gut/v2.0/species_catalogue/MGYG0000037/MGYG000003780/genome/MGYG000003780.fna	0.0853177	1	0.0817795	12	12	12	108578	108578	108578	Human-Gut	1	0.0817795	121	121	121	0	0	NA	2
./Human-Gut/pub/databases/metagenomics/mgnify_genomes/human-gut/v2.0/species_catalogue/MGYG0000029/MGYG000002972/genome/MGYG000002972.fna	0.0853204	1	0.081782	13	13	13	1213156	1213156	1213156	Human-Gut	0	1	0	0	NA	0	0	NA	1
./Human-Gut/pub/databases/metagenomics/mgnify_genomes/human-gut/v2.0/species_catalogue/MGYG0000012/MGYG000001239/genome/MGYG000001239.fna	0.0855249	1	0.0819697	5201	5201	5201	860831	860831	860831	Human-Gut	1	0.0819697	139	139	139	0	0	NA	2
./Human-Gut/pub/databases/metagenomics/mgnify_genomes/human-gut/v2.0/species_catalogue/MGYG0000006/MGYG000000601/genome/MGYG000000601.fna	0.0856284	1	0.0820648	2411	2411	2411	621178	621178	621178	Human-Gut	0	1	0	0	NA	0	0	NA	1
./Cow-Rumen/ftp.ebi.ac.uk/pub/databases/metagenomics/mgnify_genomes/cow-rumen/v1.0/species_catalogue/MGYG0002947/MGYG000294755/genome/MGYG000294755.fna	0.0858399	1	0.0822589	2173	2173	2173	1146630	1146630	1146630	Cow-Rumen	0	1	0	0	NA	0	0	NA	1
./Pig-Gut/ftp.ebi.ac.uk/pub/databases/metagenomics/mgnify_genomes/pig-gut/v1.0/species_catalogue/MGYG0003019/MGYG000301993/genome/MGYG000301993.fna	0.0858617	1	0.0822788	13	13	13	95000	95000	95000	Pig-Gut	1	0.0822788	91	91	91	0	0	NA	2
./Cow-Rumen/ftp.ebi.ac.uk/pub/databases/metagenomics/mgnify_genomes/cow-rumen/v1.0/species_catalogue/MGYG0002932/MGYG000293211/genome/MGYG000293211.fna	0.0858821	1	0.0822976	174	174	174	155994	155994	155994	Cow-Rumen	0	1	0	0	NA	0	0	NA	1
./Mouse-Gut/ftp.ebi.ac.uk/pub/databases/metagenomics/mgnify_genomes/mouse-gut/v1.0/species_catalogue/MGYG0003269/MGYG000326920/genome/MGYG000326920.fna	0.0858997	1	0.0823137	38	38	38	5947	5947	5947	Mouse-Gut	1	0.0823137	14	14	14	0	0	NA	2
./Cow-Rumen/ftp.ebi.ac.uk/pub/databases/metagenomics/mgnify_genomes/cow-rumen/v1.0/species_catalogue/MGYG0002951/MGYG000295155/genome/MGYG000295155.fna	0.085969	1	0.0823773	882	882	882	810383	810383	810383	Cow-Rumen	0	1	0	0	NA	0	0	NA	1
./Mouse-Gut/ftp.ebi.ac.uk/pub/databases/metagenomics/mgnify_genomes/mouse-gut/v1.0/species_catalogue/MGYG0003304/MGYG000330481/genome/MGYG000330481.fna	0.086156	1	0.0825489	37	37	37	1367556	1367556	1367556	Mouse-Gut	0	1	0	0	NA	0	0	NA	1
./Cow-Rumen/ftp.ebi.ac.uk/pub/databases/metagenomics/mgnify_genomes/cow-rumen/v1.0/species_catalogue/MGYG0002914/MGYG000291481/genome/MGYG000291481.fna	0.0865815	1	0.0829392	1523	1523	1523	617330	617330	617330	Cow-Rumen	0	1	0	0	NA	0	0	NA	1
./Human-Gut/pub/databases/metagenomics/mgnify_genomes/human-gut/v2.0/species_catalogue/MGYG0000016/MGYG000001646/genome/MGYG000001646.fna	0.0867052	1	0.0830526	26	26	26	442973	442973	442973	Human-Gut	0	1	0	0	NA	0	0	NA	1
./Human-Gut/pub/databases/metagenomics/mgnify_genomes/human-gut/v2.0/species_catalogue/MGYG0000007/MGYG000000763/genome/MGYG000000763.fna	0.0872239	1	0.0835282	5	5	5	32055	32055	32055	Human-Gut	0	1	0	0	NA	0	0	NA	1
./Mouse-Gut/ftp.ebi.ac.uk/pub/databases/metagenomics/mgnify_genomes/mouse-gut/v1.0/species_catalogue/MGYG0003304/MGYG000330444/genome/MGYG000330444.fna	0.0873086	1	0.0836058	7	7	7	224821	224821	224821	Mouse-Gut	0	1	0	0	NA	0	0	NA	1
./Mouse-Gut/ftp.ebi.ac.uk/pub/databases/metagenomics/mgnify_genomes/mouse-gut/v1.0/species_catalogue/MGYG0003311/MGYG000331131/genome/MGYG000331131.fna	0.0875695	1	0.0838448	23	23	23	156735	156735	156735	Mouse-Gut	0	1	0	0	NA	0	0	NA	1
./Pig-Gut/ftp.ebi.ac.uk/pub/databases/metagenomics/mgnify_genomes/pig-gut/v1.0/species_catalogue/MGYG0003022/MGYG000302290/genome/MGYG000302290.fna	0.0878091	1	0.0840643	38	38	38	1078713	1078713	1078713	Pig-Gut	0	1	0	0	NA	0	0	NA	1
./Mouse-Gut/ftp.ebi.ac.uk/pub/databases/metagenomics/mgnify_genomes/mouse-gut/v1.0/species_catalogue/MGYG0003308/MGYG000330809/genome/MGYG000330809.fna	0.0878976	1	0.0841453	38	38	38	140222	140222	140222	Mouse-Gut	3	0.000105977	29.3333	39	19	0	0	NA	4
./Human-Gut/pub/databases/metagenomics/mgnify_genomes/human-gut/v2.0/species_catalogue/MGYG0000031/MGYG000003162/genome/MGYG000003162.fna	0.0879174	1	0.0841635	2975	2975	2975	797578	797578	797578	Human-Gut	0	1	0	0	NA	0	0	NA	1
./Chicken-Gut/ftp.ebi.ac.uk/pub/databases/metagenomics/mgnify_genomes/chicken-gut/v1.0/species_catalogue/MGYG0003080/MGYG000308077/genome/MGYG000308077.fna	0.0879332	1	0.084178	13747	13747	13747	1157493	1157493	1157493	Chicken-Gut	0	1	0	0	NA	0	0	NA	1
./Human-Gut/pub/databases/metagenomics/mgnify_genomes/human-gut/v2.0/species_catalogue/MGYG0000025/MGYG000002593/genome/MGYG000002593.fna	0.0879415	1	0.0841856	25408	25408	25408	651834	651834	651834	Human-Gut	0	1	0	0	NA	0	0	NA	1
./Human-Gut/pub/databases/metagenomics/mgnify_genomes/human-gut/v2.0/species_catalogue/MGYG0000047/MGYG000004793/genome/MGYG000004793.fna	0.0881869	1	0.0844102	626	626	626	186201	186201	186201	Human-Gut	0	1	0	0	NA	0	0	NA	1
./Cow-Rumen/ftp.ebi.ac.uk/pub/databases/metagenomics/mgnify_genomes/cow-rumen/v1.0/species_catalogue/MGYG0002932/MGYG000293246/genome/MGYG000293246.fna	0.0883943	1	0.0846002	7157	7157	7157	644109	644109	644109	Cow-Rumen	0	1	0	0	NA	0	0	NA	1
./Mouse-Gut/ftp.ebi.ac.uk/pub/databases/metagenomics/mgnify_genomes/mouse-gut/v1.0/species_catalogue/MGYG0003309/MGYG000330935/genome/MGYG000330935.fna	0.0884696	1	0.084669	6	6	6	85582	85582	85582	Mouse-Gut	2	0.0036901	73	120	26	0	0	NA	3
./Human-Gut/pub/databases/metagenomics/mgnify_genomes/human-gut/v2.0/species_catalogue/MGYG0000027/MGYG000002792/genome/MGYG000002792.fna	0.0887187	1	0.0848971	8	8	8	80919	80919	80919	Human-Gut	3	0.000108908	15	17	12	0	0	NA	4
./Marine/ftp.ebi.ac.uk/pub/databases/metagenomics/mgnify_genomes/marine/v1.0/species_catalogue/MGYG0002974/MGYG000297499/genome/MGYG000297499.fna	0.0888245	1	0.0849938	98309	98309	98309	810606	810606	810606	Marine	0	1	0	0	NA	0	0	NA	1
./Mouse-Gut/ftp.ebi.ac.uk/pub/databases/metagenomics/mgnify_genomes/mouse-gut/v1.0/species_catalogue/MGYG0003257/MGYG000325750/genome/MGYG000325750.fna	0.0891072	1	0.0852525	2416	2416	2416	486386	486386	486386	Mouse-Gut	0	1	0	0	NA	0	0	NA	1
./Pig-Gut/ftp.ebi.ac.uk/pub/databases/metagenomics/mgnify_genomes/pig-gut/v1.0/species_catalogue/MGYG0002997/MGYG000299751/genome/MGYG000299751.fna	0.0893891	1	0.0855103	6886	6886	6886	1397752	1397752	1397752	Pig-Gut	0	1	0	0	NA	0	0	NA	1
./Pig-Gut/ftp.ebi.ac.uk/pub/databases/metagenomics/mgnify_genomes/pig-gut/v1.0/species_catalogue/MGYG0003021/MGYG000302194/genome/MGYG000302194.fna	0.0893989	1	0.0855193	8	8	8	38970	38970	38970	Pig-Gut	0	1	0	0	NA	0	0	NA	1
./Cow-Rumen/ftp.ebi.ac.uk/pub/databases/metagenomics/mgnify_genomes/cow-rumen/v1.0/species_catalogue/MGYG0002954/MGYG000295445/genome/MGYG000295445.fna	0.089408	1	0.0855276	17162	17162	17162	539896	539896	539896	Cow-Rumen	0	1	0	0	NA	0	0	NA	1
./Human-Gut/pub/databases/metagenomics/mgnify_genomes/human-gut/v2.0/species_catalogue/MGYG0000007/MGYG000000754/genome/MGYG000000754.fna	0.0898396	1	0.0859222	3348	3348	3348	926719	926719	926719	Human-Gut	2	0.00380183	296.5	346	247	0	0	NA	3
./Human-Gut/pub/databases/metagenomics/mgnify_genomes/human-gut/v2.0/species_catalogue/MGYG0000048/MGYG000004886/genome/MGYG000004886.fna	0.089954	1	0.0860267	1	1	1	508951	508951	508951	Human-Gut	2	0.00381122	569	638	500	0	0	NA	3
./Human-Gut/pub/databases/metagenomics/mgnify_genomes/human-gut/v2.0/species_catalogue/MGYG0000031/MGYG000003149/genome/MGYG000003149.fna	0.0900287	1	0.086095	265574	265574	265574	1509816	1509816	1509816	Human-Gut	0	1	0	0	NA	0	0	NA	1
./Pig-Gut/ftp.ebi.ac.uk/pub/databases/metagenomics/mgnify_genomes/pig-gut/v1.0/species_catalogue/MGYG0003018/MGYG000301838/genome/MGYG000301838.fna	0.0902029	1	0.0862543	11	11	11	974542	974542	974542	Pig-Gut	1	0.0862543	23	23	23	0	0	NA	2
./Chicken-Gut/ftp.ebi.ac.uk/pub/databases/metagenomics/mgnify_genomes/chicken-gut/v1.0/species_catalogue/MGYG0003182/MGYG000318221/genome/MGYG000318221.fna	0.090361	1	0.0863987	52277	52277	52277	716643	716643	716643	Chicken-Gut	0	1	0	0	NA	0	0	NA	1
./Mouse-Gut/ftp.ebi.ac.uk/pub/databases/metagenomics/mgnify_genomes/mouse-gut/v1.0/species_catalogue/MGYG0003951/MGYG000395185/genome/MGYG000395185.fna	0.0904372	1	0.0864683	11557	11557	11557	605251	605251	605251	Mouse-Gut	0	1	0	0	NA	0	0	NA	1
./Human-Vaginal/ftp.ebi.ac.uk/pub/databases/metagenomics/mgnify_genomes/human-vaginal/v1.0/species_catalogue/MGYG0003042/MGYG000304284/genome/MGYG000304284.fna	0.0904493	1	0.0864794	12072	12072	12072	1276387	1276387	1276387	Human-Vaginal	0	1	0	0	NA	0	0	NA	1
./Mouse-Gut/ftp.ebi.ac.uk/pub/databases/metagenomics/mgnify_genomes/mouse-gut/v1.0/species_catalogue/MGYG0003244/MGYG000324487/genome/MGYG000324487.fna	0.0905677	1	0.0865875	118	118	118	478460	478460	478460	Mouse-Gut	1	0.0865875	94	94	94	0	0	NA	2
./Cow-Rumen/ftp.ebi.ac.uk/pub/databases/metagenomics/mgnify_genomes/cow-rumen/v1.0/species_catalogue/MGYG0002929/MGYG000292970/genome/MGYG000292970.fna	0.0905793	1	0.0865981	20167	20167	20167	446675	446675	446675	Cow-Rumen	2	0.00386279	36.5	39	34	0	0	NA	3
./Human-Gut/pub/databases/metagenomics/mgnify_genomes/human-gut/v2.0/species_catalogue/MGYG0000040/MGYG000004024/genome/MGYG000004024.fna	0.0906367	1	0.0866506	1834	1834	1834	333468	333468	333468	Human-Gut	0	1	0	0	NA	0	0	NA	1
./Human-Gut/pub/databases/metagenomics/mgnify_genomes/human-gut/v2.0/species_catalogue/MGYG0000046/MGYG000004637/genome/MGYG000004637.fna	0.0906603	1	0.0866721	25630	25630	25630	1407665	1407665	1407665	Human-Gut	0	1	0	0	NA	0	0	NA	1
./Marine/ftp.ebi.ac.uk/pub/databases/metagenomics/mgnify_genomes/marine/v1.0/species_catalogue/MGYG0002973/MGYG000297309/genome/MGYG000297309.fna	0.0906808	1	0.0866908	4	4	4	80356	80356	80356	Marine	0	1	0	0	NA	0	0	NA	1
./Human-Gut/pub/databases/metagenomics/mgnify_genomes/human-gut/v2.0/species_catalogue/MGYG0000007/MGYG000000766/genome/MGYG000000766.fna	0.0908178	1	0.0868159	11	11	11	196799	196799	196799	Human-Gut	0	1	0	0	NA	0	0	NA	1
./Chicken-Gut/ftp.ebi.ac.uk/pub/databases/metagenomics/mgnify_genomes/chicken-gut/v1.0/species_catalogue/MGYG0003160/MGYG000316031/genome/MGYG000316031.fna	0.090819	1	0.086817	129407	129407	129407	1361393	1361393	1361393	Chicken-Gut	0	1	0	0	NA	0	0	NA	1
./Cow-Rumen/ftp.ebi.ac.uk/pub/databases/metagenomics/mgnify_genomes/cow-rumen/v1.0/species_catalogue/MGYG0002947/MGYG000294731/genome/MGYG000294731.fna	0.0908964	1	0.0868877	1663	1663	1663	69529	69529	69529	Cow-Rumen	0	1	0	0	NA	0	0	NA	1
./Cow-Rumen/ftp.ebi.ac.uk/pub/databases/metagenomics/mgnify_genomes/cow-rumen/v1.0/species_catalogue/MGYG0002936/MGYG000293645/genome/MGYG000293645.fna	0.0909759	1	0.0869603	10128	10128	10128	624007	624007	624007	Cow-Rumen	0	1	0	0	NA	0	0	NA	1
./Human-Gut/pub/databases/metagenomics/mgnify_genomes/human-gut/v2.0/species_catalogue/MGYG0000037/MGYG000003726/genome/MGYG000003726.fna	0.0912679	1	0.0872268	23	23	23	1666	1666	1666	Human-Gut	1	0.0872268	101	101	101	0	0	NA	2
./Mouse-Gut/ftp.ebi.ac.uk/pub/databases/metagenomics/mgnify_genomes/mouse-gut/v1.0/species_catalogue/MGYG0004105/MGYG000410524/genome/MGYG000410524.fna	0.0912863	1	0.0872437	3	3	3	1204165	1204165	1204165	Mouse-Gut	1	0.0872437	92	92	92	0	0	NA	2
./Human-Gut/pub/databases/metagenomics/mgnify_genomes/human-gut/v2.0/species_catalogue/MGYG0000046/MGYG000004646/genome/MGYG000004646.fna	0.0915091	1	0.087447	54	54	54	259712	259712	259712	Human-Gut	0	1	0	0	NA	0	0	NA	1
./Human-Gut/pub/databases/metagenomics/mgnify_genomes/human-gut/v2.0/species_catalogue/MGYG0000028/MGYG000002890/genome/MGYG000002890.fna	0.0916955	1	0.0876171	20	20	20	89595	89595	89595	Human-Gut	0	1	0	0	NA	0	0	NA	1
./Human-Gut/pub/databases/metagenomics/mgnify_genomes/human-gut/v2.0/species_catalogue/MGYG0000045/MGYG000004578/genome/MGYG000004578.fna	0.0917843	1	0.0876981	34984	34984	34984	240485	240485	240485	Human-Gut	1	0.0876981	33	33	33	0	0	NA	2
./Cow-Rumen/ftp.ebi.ac.uk/pub/databases/metagenomics/mgnify_genomes/cow-rumen/v1.0/species_catalogue/MGYG0002947/MGYG000294765/genome/MGYG000294765.fna	0.0918313	1	0.087741	3463	3463	3463	905744	905744	905744	Cow-Rumen	1	0.087741	113	113	113	0	0	NA	2
./Mouse-Gut/ftp.ebi.ac.uk/pub/databases/metagenomics/mgnify_genomes/mouse-gut/v1.0/species_catalogue/MGYG0003227/MGYG000322784/genome/MGYG000322784.fna	0.0918798	1	0.0877852	25	25	25	154027	154027	154027	Mouse-Gut	1	0.0877852	42	42	42	133	133	133	2
./Human-Gut/pub/databases/metagenomics/mgnify_genomes/human-gut/v2.0/species_catalogue/MGYG0000018/MGYG000001818/genome/MGYG000001818.fna	0.0919736	1	0.0878708	556	556	556	1232082	1232082	1232082	Human-Gut	0	1	0	0	NA	0	0	NA	1
./Mouse-Gut/ftp.ebi.ac.uk/pub/databases/metagenomics/mgnify_genomes/mouse-gut/v1.0/species_catalogue/MGYG0003294/MGYG000329499/genome/MGYG000329499.fna	0.0920681	1	0.0879569	13889	13889	13889	174129	174129	174129	Mouse-Gut	0	1	0	0	NA	0	0	NA	1
./Cow-Rumen/ftp.ebi.ac.uk/pub/databases/metagenomics/mgnify_genomes/cow-rumen/v1.0/species_catalogue/MGYG0002909/MGYG000290913/genome/MGYG000290913.fna	0.0921963	1	0.0880739	3585	3585	3585	1505821	1505821	1505821	Cow-Rumen	0	1	0	0	NA	0	0	NA	1
./Human-Gut/pub/databases/metagenomics/mgnify_genomes/human-gut/v2.0/species_catalogue/MGYG0000020/MGYG000002036/genome/MGYG000002036.fna	0.0925125	1	0.0883622	2	2	2	99275	99275	99275	Human-Gut	0	1	0	0	NA	0	0	NA	1
./Mouse-Gut/ftp.ebi.ac.uk/pub/databases/metagenomics/mgnify_genomes/mouse-gut/v1.0/species_catalogue/MGYG0003257/MGYG000325718/genome/MGYG000325718.fna	0.0926277	1	0.0884672	7507	7507	7507	1471295	1471295	1471295	Mouse-Gut	0	1	0	0	NA	0	0	NA	1
./Marine/ftp.ebi.ac.uk/pub/databases/metagenomics/mgnify_genomes/marine/v1.0/species_catalogue/MGYG0002969/MGYG000296920/genome/MGYG000296920.fna	0.092721	1	0.0885523	9	9	9	95701	95701	95701	Marine	0	1	0	0	NA	0	0	NA	1
./Cow-Rumen/ftp.ebi.ac.uk/pub/databases/metagenomics/mgnify_genomes/cow-rumen/v1.0/species_catalogue/MGYG0002952/MGYG000295244/genome/MGYG000295244.fna	0.0931447	1	0.0889383	2381	2381	2381	1194475	1194475	1194475	Cow-Rumen	1	0.0889383	72	72	72	0	0	NA	2
./Human-Gut/pub/databases/metagenomics/mgnify_genomes/human-gut/v2.0/species_catalogue/MGYG0000029/MGYG000002997/genome/MGYG000002997.fna	0.0932735	1	0.0890557	42	42	42	223610	223610	223610	Human-Gut	0	1	0	0	NA	0	0	NA	1
./Pig-Gut/ftp.ebi.ac.uk/pub/databases/metagenomics/mgnify_genomes/pig-gut/v1.0/species_catalogue/MGYG0003022/MGYG000302255/genome/MGYG000302255.fna	0.0935242	1	0.089284	30	30	30	391411	391411	391411	Pig-Gut	0	1	0	0	NA	0	0	NA	1
./Marine/ftp.ebi.ac.uk/pub/databases/metagenomics/mgnify_genomes/marine/v1.0/species_catalogue/MGYG0002964/MGYG000296473/genome/MGYG000296473.fna	0.0938421	1	0.0895735	44	44	44	938095	938095	938095	Marine	0	1	0	0	NA	0	0	NA	1
./Chicken-Gut/ftp.ebi.ac.uk/pub/databases/metagenomics/mgnify_genomes/chicken-gut/v1.0/species_catalogue/MGYG0003138/MGYG000313860/genome/MGYG000313860.fna	0.0938462	1	0.0895772	2390	2390	2390	1119107	1119107	1119107	Chicken-Gut	0	1	0	0	NA	0	0	NA	1
./Pig-Gut/ftp.ebi.ac.uk/pub/databases/metagenomics/mgnify_genomes/pig-gut/v1.0/species_catalogue/MGYG0003026/MGYG000302665/genome/MGYG000302665.fna	0.0941975	1	0.089897	2415	2415	2415	159204	159204	159204	Pig-Gut	1	0.089897	102	102	102	0	0	NA	2
./Mouse-Gut/ftp.ebi.ac.uk/pub/databases/metagenomics/mgnify_genomes/mouse-gut/v1.0/species_catalogue/MGYG0004106/MGYG000410674/genome/MGYG000410674.fna	0.0942214	1	0.0899187	65	65	65	1478701	1478701	1478701	Mouse-Gut	0	1	0	0	NA	0	0	NA	1
./Cow-Rumen/ftp.ebi.ac.uk/pub/databases/metagenomics/mgnify_genomes/cow-rumen/v1.0/species_catalogue/MGYG0002920/MGYG000292074/genome/MGYG000292074.fna	0.0942345	1	0.0899307	3323	3323	3323	133242	133242	133242	Cow-Rumen	0	1	0	0	NA	0	0	NA	1
./Human-Gut/pub/databases/metagenomics/mgnify_genomes/human-gut/v2.0/species_catalogue/MGYG0000032/MGYG000003260/genome/MGYG000003260.fna	0.0943895	1	0.0900717	12	12	12	1356250	1356250	1356250	Human-Gut	3	0.000130601	132	170	57	0	0	NA	4
./Pig-Gut/ftp.ebi.ac.uk/pub/databases/metagenomics/mgnify_genomes/pig-gut/v1.0/species_catalogue/MGYG0003011/MGYG000301146/genome/MGYG000301146.fna	0.0946221	1	0.0902833	44	44	44	369747	369747	369747	Pig-Gut	1	0.0902833	216	216	216	0	0	NA	2
./Mouse-Gut/ftp.ebi.ac.uk/pub/databases/metagenomics/mgnify_genomes/mouse-gut/v1.0/species_catalogue/MGYG0003309/MGYG000330936/genome/MGYG000330936.fna	0.0946572	1	0.0903153	41	41	41	114541	114541	114541	Mouse-Gut	4	3.10147e-06	105.25	171	44	0	0	NA	5
./Pig-Gut/ftp.ebi.ac.uk/pub/databases/metagenomics/mgnify_genomes/pig-gut/v1.0/species_catalogue/MGYG0003009/MGYG000300951/genome/MGYG000300951.fna	0.0950358	1	0.0906596	73	73	73	297030	297030	297030	Pig-Gut	0	1	0	0	NA	0	0	NA	1
./Human-Oral/ftp.ebi.ac.uk/pub/databases/metagenomics/mgnify_genomes/human-oral/v1.0/species_catalogue/MGYG0002990/MGYG000299023/genome/MGYG000299023.fna	0.0950441	1	0.0906671	7934	7934	7934	972775	972775	972775	Human-Oral	0	1	0	0	NA	0	0	NA	1
./Mouse-Gut/ftp.ebi.ac.uk/pub/databases/metagenomics/mgnify_genomes/mouse-gut/v1.0/species_catalogue/MGYG0003312/MGYG000331234/genome/MGYG000331234.fna	0.0950689	1	0.0906897	49719	49719	49719	1105159	1105159	1105159	Mouse-Gut	0	1	0	0	NA	0	0	NA	1
./Marine/ftp.ebi.ac.uk/pub/databases/metagenomics/mgnify_genomes/marine/v1.0/species_catalogue/MGYG0002965/MGYG000296518/genome/MGYG000296518.fna	0.0952601	1	0.0908636	6	6	6	1046327	1046327	1046327	Marine	0	1	0	0	NA	0	0	NA	1
./Human-Gut/pub/databases/metagenomics/mgnify_genomes/human-gut/v2.0/species_catalogue/MGYG0000035/MGYG000003507/genome/MGYG000003507.fna	0.0953338	1	0.0909305	13	13	13	1221440	1221440	1221440	Human-Gut	1	0.0909305	27	27	27	0	0	NA	2
./Pig-Gut/ftp.ebi.ac.uk/pub/databases/metagenomics/mgnify_genomes/pig-gut/v1.0/species_catalogue/MGYG0003021/MGYG000302101/genome/MGYG000302101.fna	0.0953645	1	0.0909584	23	23	23	15643	15643	15643	Pig-Gut	0	1	0	0	NA	0	0	NA	1
./Human-Gut/pub/databases/metagenomics/mgnify_genomes/human-gut/v2.0/species_catalogue/MGYG0000042/MGYG000004247/genome/MGYG000004247.fna	0.0953839	1	0.0909761	3	3	3	132838	132838	132838	Human-Gut	1	0.0909761	171	171	171	0	0	NA	2
./Marine/ftp.ebi.ac.uk/pub/databases/metagenomics/mgnify_genomes/marine/v1.0/species_catalogue/MGYG0002962/MGYG000296207/genome/MGYG000296207.fna	0.0954311	1	0.0910191	21562	21562	21562	551386	551386	551386	Marine	0	1	0	0	NA	0	0	NA	1
./Cow-Rumen/ftp.ebi.ac.uk/pub/databases/metagenomics/mgnify_genomes/cow-rumen/v1.0/species_catalogue/MGYG0002932/MGYG000293208/genome/MGYG000293208.fna	0.0955119	1	0.0910925	2474	2474	2474	1515495	1515495	1515495	Cow-Rumen	0	1	0	0	NA	0	0	NA	1
./Mouse-Gut/ftp.ebi.ac.uk/pub/databases/metagenomics/mgnify_genomes/mouse-gut/v1.0/species_catalogue/MGYG0004105/MGYG000410541/genome/MGYG000410541.fna	0.0955254	1	0.0911048	58	58	58	17278	17278	17278	Mouse-Gut	1	0.0911048	130	130	130	0	0	NA	2
./Human-Vaginal/ftp.ebi.ac.uk/pub/databases/metagenomics/mgnify_genomes/human-vaginal/v1.0/species_catalogue/MGYG0003038/MGYG000303878/genome/MGYG000303878.fna	0.0959476	1	0.0914883	39	39	39	409842	409842	409842	Human-Vaginal	0	1	0	0	NA	0	0	NA	1
./Human-Gut/pub/databases/metagenomics/mgnify_genomes/human-gut/v2.0/species_catalogue/MGYG0000046/MGYG000004656/genome/MGYG000004656.fna	0.0960869	1	0.0916149	59	59	59	754896	754896	754896	Human-Gut	1	0.0916149	77	77	77	0	0	NA	2
./Human-Vaginal/ftp.ebi.ac.uk/pub/databases/metagenomics/mgnify_genomes/human-vaginal/v1.0/species_catalogue/MGYG0003038/MGYG000303814/genome/MGYG000303814.fna	0.0961517	1	0.0916737	40	40	40	672811	672811	672811	Human-Vaginal	0	1	0	0	NA	0	0	NA	1
./Human-Gut/pub/databases/metagenomics/mgnify_genomes/human-gut/v2.0/species_catalogue/MGYG0000012/MGYG000001249/genome/MGYG000001249.fna	0.0962522	1	0.0917651	12090	12090	12090	342588	342588	342588	Human-Gut	0	1	0	0	NA	0	0	NA	1
./Human-Gut/pub/databases/metagenomics/mgnify_genomes/human-gut/v2.0/species_catalogue/MGYG0000033/MGYG000003329/genome/MGYG000003329.fna	0.0962645	1	0.0917763	17	17	17	1321635	1321635	1321635	Human-Gut	7	1.39726e-11	25.7143	43	3	0	0	NA	8
./Pig-Gut/ftp.ebi.ac.uk/pub/databases/metagenomics/mgnify_genomes/pig-gut/v1.0/species_catalogue/MGYG0003015/MGYG000301555/genome/MGYG000301555.fna	0.0963184	1	0.0918252	40	40	40	799881	799881	799881	Pig-Gut	0	1	0	0	NA	0	0	NA	1
./Cow-Rumen/ftp.ebi.ac.uk/pub/databases/metagenomics/mgnify_genomes/cow-rumen/v1.0/species_catalogue/MGYG0002946/MGYG000294675/genome/MGYG000294675.fna	0.0964469	1	0.0919419	10760	10760	10760	1059279	1059279	1059279	Cow-Rumen	0	1	0	0	NA	0	0	NA	1
./Human-Gut/pub/databases/metagenomics/mgnify_genomes/human-gut/v2.0/species_catalogue/MGYG0000039/MGYG000003950/genome/MGYG000003950.fna	0.0965522	1	0.0920375	3536	3536	3536	1372715	1372715	1372715	Human-Gut	1	0.0920375	472	472	472	0	0	NA	2
./Human-Gut/pub/databases/metagenomics/mgnify_genomes/human-gut/v2.0/species_catalogue/MGYG0000037/MGYG000003740/genome/MGYG000003740.fna	0.0965554	1	0.0920404	17	17	17	969978	969978	969978	Human-Gut	0	1	0	0	NA	0	0	NA	1
./Marine/ftp.ebi.ac.uk/pub/databases/metagenomics/mgnify_genomes/marine/v1.0/species_catalogue/MGYG0002961/MGYG000296182/genome/MGYG000296182.fna	0.0967486	1	0.0922158	27958	27958	27958	1206771	1206771	1206771	Marine	0	1	0	0	NA	0	0	NA	1
./Non-Model-Fish-Gut/ftp.ebi.ac.uk/pub/databases/metagenomics/mgnify_genomes/non-model-fish-gut/v2.0/species_catalogue/MGYG0002995/MGYG000299510/genome/MGYG000299510.fna	0.0967891	1	0.0922525	34	34	34	124621	124621	124621	Non-Model-Fish-Gut	2	0.00439251	39	59	19	0	0	NA	3
./Human-Gut/pub/databases/metagenomics/mgnify_genomes/human-gut/v2.0/species_catalogue/MGYG0000004/MGYG000000475/genome/MGYG000000475.fna	0.0968812	1	0.0923362	6	6	6	152927	152927	152927	Human-Gut	1	0.0923362	32	32	32	0	0	NA	2
./Mouse-Gut/ftp.ebi.ac.uk/pub/databases/metagenomics/mgnify_genomes/mouse-gut/v1.0/species_catalogue/MGYG0003231/MGYG000323127/genome/MGYG000323127.fna	0.0969809	1	0.0924267	12	12	12	35457	35457	35457	Mouse-Gut	0	1	0	0	NA	0	0	NA	1
./Cow-Rumen/ftp.ebi.ac.uk/pub/databases/metagenomics/mgnify_genomes/cow-rumen/v1.0/species_catalogue/MGYG0002929/MGYG000292974/genome/MGYG000292974.fna	0.0970804	1	0.092517	5172	5172	5172	1096470	1096470	1096470	Cow-Rumen	0	1	0	0	NA	0	0	NA	1
./Mouse-Gut/ftp.ebi.ac.uk/pub/databases/metagenomics/mgnify_genomes/mouse-gut/v1.0/species_catalogue/MGYG0003268/MGYG000326823/genome/MGYG000326823.fna	0.0971501	1	0.0925802	33	33	33	118427	118427	118427	Mouse-Gut	1	0.0925802	38	38	38	0	0	NA	2
./Mouse-Gut/ftp.ebi.ac.uk/pub/databases/metagenomics/mgnify_genomes/mouse-gut/v1.0/species_catalogue/MGYG0003227/MGYG000322712/genome/MGYG000322712.fna	0.0972719	1	0.0926907	5	5	5	1624796	1624796	1624796	Mouse-Gut	0	1	0	0	NA	0	0	NA	1
./Pig-Gut/ftp.ebi.ac.uk/pub/databases/metagenomics/mgnify_genomes/pig-gut/v1.0/species_catalogue/MGYG0003006/MGYG000300655/genome/MGYG000300655.fna	0.0972846	1	0.0927022	6599	6599	6599	1246769	1246769	1246769	Pig-Gut	0	1	0	0	NA	0	0	NA	1
./Marine/ftp.ebi.ac.uk/pub/databases/metagenomics/mgnify_genomes/marine/v1.0/species_catalogue/MGYG0002971/MGYG000297185/genome/MGYG000297185.fna	0.0974701	1	0.0928705	2724	2724	2724	1153542	1153542	1153542	Marine	0	1	0	0	NA	0	0	NA	1
./Mouse-Gut/ftp.ebi.ac.uk/pub/databases/metagenomics/mgnify_genomes/mouse-gut/v1.0/species_catalogue/MGYG0003307/MGYG000330750/genome/MGYG000330750.fna	0.0974836	1	0.0928828	38	38	38	772167	772167	772167	Mouse-Gut	0	1	0	0	NA	0	0	NA	1
./Cow-Rumen/ftp.ebi.ac.uk/pub/databases/metagenomics/mgnify_genomes/cow-rumen/v1.0/species_catalogue/MGYG0002946/MGYG000294667/genome/MGYG000294667.fna	0.0976977	1	0.093077	6933	6933	6933	1465989	1465989	1465989	Cow-Rumen	1	0.093077	54	54	54	0	0	NA	2
./Mouse-Gut/ftp.ebi.ac.uk/pub/databases/metagenomics/mgnify_genomes/mouse-gut/v1.0/species_catalogue/MGYG0003283/MGYG000328333/genome/MGYG000328333.fna	0.0978566	1	0.0932211	5	5	5	799676	799676	799676	Mouse-Gut	4	3.53351e-06	64.75	95	7	0	0	NA	5
./Human-Gut/pub/databases/metagenomics/mgnify_genomes/human-gut/v2.0/species_catalogue/MGYG0000032/MGYG000003250/genome/MGYG000003250.fna	0.0979084	1	0.0932681	10	10	10	252982	252982	252982	Human-Gut	0	1	0	0	NA	0	0	NA	1
./Human-Gut/pub/databases/metagenomics/mgnify_genomes/human-gut/v2.0/species_catalogue/MGYG0000037/MGYG000003757/genome/MGYG000003757.fna	0.0979127	1	0.093272	2968	2968	2968	61803	61803	61803	Human-Gut	1	0.093272	57	57	57	0	0	NA	2
./Marine/ftp.ebi.ac.uk/pub/databases/metagenomics/mgnify_genomes/marine/v1.0/species_catalogue/MGYG0002963/MGYG000296373/genome/MGYG000296373.fna	0.097919	1	0.0932776	12226	12226	12226	1493162	1493162	1493162	Marine	0	1	0	0	NA	0	0	NA	1
./Human-Gut/pub/databases/metagenomics/mgnify_genomes/human-gut/v2.0/species_catalogue/MGYG0000048/MGYG000004870/genome/MGYG000004870.fna	0.098004	1	0.0933547	3	3	3	237257	237257	237257	Human-Gut	1	0.0933547	763	763	763	0	0	NA	2
./Human-Gut/pub/databases/metagenomics/mgnify_genomes/human-gut/v2.0/species_catalogue/MGYG0000007/MGYG000000705/genome/MGYG000000705.fna	0.0983172	1	0.0936386	447296	447296	447296	1484112	1484112	1484112	Human-Gut	0	1	0	0	NA	0	0	NA	1
./Human-Oral/ftp.ebi.ac.uk/pub/databases/metagenomics/mgnify_genomes/human-oral/v1.0/species_catalogue/MGYG0002988/MGYG000298803/genome/MGYG000298803.fna	0.0983509	1	0.0936692	28693	28693	28693	846603	846603	846603	Human-Oral	1	0.0936692	18	18	18	0	0	NA	2
./Cow-Rumen/ftp.ebi.ac.uk/pub/databases/metagenomics/mgnify_genomes/cow-rumen/v1.0/species_catalogue/MGYG0002912/MGYG000291226/genome/MGYG000291226.fna	0.0985213	1	0.0938236	460562	460562	460562	1500471	1500471	1500471	Cow-Rumen	0	1	0	0	NA	0	0	NA	1
./Human-Gut/pub/databases/metagenomics/mgnify_genomes/human-gut/v2.0/species_catalogue/MGYG0000026/MGYG000002639/genome/MGYG000002639.fna	0.099102	1	0.0943497	10	10	10	199409	199409	199409	Human-Gut	1	0.0943497	27	27	27	0	0	NA	2
./Pig-Gut/ftp.ebi.ac.uk/pub/databases/metagenomics/mgnify_genomes/pig-gut/v1.0/species_catalogue/MGYG0002999/MGYG000299916/genome/MGYG000299916.fna	0.0991354	1	0.0943799	10	10	10	831290	831290	831290	Pig-Gut	0	1	0	0	NA	0	0	NA	1
./Human-Gut/pub/databases/metagenomics/mgnify_genomes/human-gut/v2.0/species_catalogue/MGYG0000037/MGYG000003706/genome/MGYG000003706.fna	0.0991473	1	0.0943907	2564	2564	2564	240551	240551	240551	Human-Gut	0	1	0	0	NA	0	0	NA	1
./Pig-Gut/ftp.ebi.ac.uk/pub/databases/metagenomics/mgnify_genomes/pig-gut/v1.0/species_catalogue/MGYG0003012/MGYG000301282/genome/MGYG000301282.fna	0.0991863	1	0.094426	5	5	5	167913	167913	167913	Pig-Gut	1	0.094426	84	84	84	0	0	NA	2
./Marine/ftp.ebi.ac.uk/pub/databases/metagenomics/mgnify_genomes/marine/v1.0/species_catalogue/MGYG0002965/MGYG000296567/genome/MGYG000296567.fna	0.0992301	1	0.0944656	32	32	32	21317	21317	21317	Marine	3	0.000151195	164.667	259	62	0	0	NA	4
./Human-Vaginal/ftp.ebi.ac.uk/pub/databases/metagenomics/mgnify_genomes/human-vaginal/v1.0/species_catalogue/MGYG0003039/MGYG000303966/genome/MGYG000303966.fna	0.0992616	1	0.0944942	41	41	41	202907	202907	202907	Human-Vaginal	0	1	0	0	NA	0	0	NA	1
./Human-Gut/pub/databases/metagenomics/mgnify_genomes/human-gut/v2.0/species_catalogue/MGYG0000006/MGYG000000699/genome/MGYG000000699.fna	0.0993502	1	0.0945744	18	18	18	483374	483374	483374	Human-Gut	2	0.00462021	69.5	124	15	0	0	NA	3
./Pig-Gut/ftp.ebi.ac.uk/pub/databases/metagenomics/mgnify_genomes/pig-gut/v1.0/species_catalogue/MGYG0003014/MGYG000301422/genome/MGYG000301422.fna	0.0993524	1	0.0945764	1204	1204	1204	874344	874344	874344	Pig-Gut	0	1	0	0	NA	0	0	NA	1
./Pig-Gut/ftp.ebi.ac.uk/pub/databases/metagenomics/mgnify_genomes/pig-gut/v1.0/species_catalogue/MGYG0003022/MGYG000302267/genome/MGYG000302267.fna	0.0993642	1	0.0945871	28	28	28	160354	160354	160354	Pig-Gut	0	1	0	0	NA	0	0	NA	1
./Marine/ftp.ebi.ac.uk/pub/databases/metagenomics/mgnify_genomes/marine/v1.0/species_catalogue/MGYG0002963/MGYG000296363/genome/MGYG000296363.fna	0.0993907	1	0.0946111	5	5	5	554165	554165	554165	Marine	2	0.00462386	56	72	40	0	0	NA	3
./Chicken-Gut/ftp.ebi.ac.uk/pub/databases/metagenomics/mgnify_genomes/chicken-gut/v1.0/species_catalogue/MGYG0003151/MGYG000315127/genome/MGYG000315127.fna	0.099436	1	0.0946522	154528	154528	154528	1625896	1625896	1625896	Chicken-Gut	0	1	0	0	NA	0	0	NA	1
./Mouse-Gut/ftp.ebi.ac.uk/pub/databases/metagenomics/mgnify_genomes/mouse-gut/v1.0/species_catalogue/MGYG0003240/MGYG000324069/genome/MGYG000324069.fna	0.099626	1	0.0948241	32	32	32	1228893	1228893	1228893	Mouse-Gut	1	0.0948241	16	16	16	0	0	NA	2
./Cow-Rumen/ftp.ebi.ac.uk/pub/databases/metagenomics/mgnify_genomes/cow-rumen/v1.0/species_catalogue/MGYG0002948/MGYG000294899/genome/MGYG000294899.fna	0.100163	1	0.0953104	4510	4510	4510	997656	997656	997656	Cow-Rumen	2	0.00469363	238.5	310	167	0	0	NA	3
./Human-Gut/pub/databases/metagenomics/mgnify_genomes/human-gut/v2.0/species_catalogue/MGYG0000004/MGYG000000478/genome/MGYG000000478.fna	0.100362	1	0.0954901	8	8	8	370683	370683	370683	Human-Gut	0	1	0	0	NA	0	0	NA	1
./Chicken-Gut/ftp.ebi.ac.uk/pub/databases/metagenomics/mgnify_genomes/chicken-gut/v1.0/species_catalogue/MGYG0003164/MGYG000316468/genome/MGYG000316468.fna	0.10049	1	0.0956057	9225	9225	9225	210324	210324	210324	Chicken-Gut	0	1	0	0	NA	0	0	NA	1
./Mouse-Gut/ftp.ebi.ac.uk/pub/databases/metagenomics/mgnify_genomes/mouse-gut/v1.0/species_catalogue/MGYG0003360/MGYG000336017/genome/MGYG000336017.fna	0.10059	1	0.0956964	5219	5219	5219	1289	1289	1289	Mouse-Gut	1	0.0956964	328	328	328	2150	2150	2150	2
./Human-Gut/pub/databases/metagenomics/mgnify_genomes/human-gut/v2.0/species_catalogue/MGYG0000009/MGYG000000931/genome/MGYG000000931.fna	0.100693	1	0.0957894	71064	71064	71064	1586960	1586960	1586960	Human-Gut	0	1	0	0	NA	0	0	NA	1
./Pig-Gut/ftp.ebi.ac.uk/pub/databases/metagenomics/mgnify_genomes/pig-gut/v1.0/species_catalogue/MGYG0003014/MGYG000301479/genome/MGYG000301479.fna	0.100727	1	0.0958206	27	27	27	1077211	1077211	1077211	Pig-Gut	0	1	0	0	NA	0	0	NA	1
./Mouse-Gut/ftp.ebi.ac.uk/pub/databases/metagenomics/mgnify_genomes/mouse-gut/v1.0/species_catalogue/MGYG0003247/MGYG000324706/genome/MGYG000324706.fna	0.100741	1	0.0958328	83003	83003	83003	943924	943924	943924	Mouse-Gut	1	0.0958328	4	4	4	0	0	NA	2
./Human-Gut/pub/databases/metagenomics/mgnify_genomes/human-gut/v2.0/species_catalogue/MGYG0000042/MGYG000004251/genome/MGYG000004251.fna	0.10079	1	0.0958771	1	1	1	142387	142387	142387	Human-Gut	2	0.00475058	264.5	269	260	0	0	NA	3
./Marine/ftp.ebi.ac.uk/pub/databases/metagenomics/mgnify_genomes/marine/v1.0/species_catalogue/MGYG0002967/MGYG000296716/genome/MGYG000296716.fna	0.100968	1	0.0960378	55581	55581	55581	1291135	1291135	1291135	Marine	0	1	0	0	NA	0	0	NA	1
./Mouse-Gut/ftp.ebi.ac.uk/pub/databases/metagenomics/mgnify_genomes/mouse-gut/v1.0/species_catalogue/MGYG0003313/MGYG000331304/genome/MGYG000331304.fna	0.100992	1	0.09606	6	6	6	342089	342089	342089	Mouse-Gut	1	0.09606	68	68	68	0	0	NA	2
./Human-Gut/pub/databases/metagenomics/mgnify_genomes/human-gut/v2.0/species_catalogue/MGYG0000030/MGYG000003006/genome/MGYG000003006.fna	0.101216	1	0.0962618	41	41	41	452708	452708	452708	Human-Gut	1	0.0962618	125	125	125	0	0	NA	2
./Human-Gut/pub/databases/metagenomics/mgnify_genomes/human-gut/v2.0/species_catalogue/MGYG0000037/MGYG000003754/genome/MGYG000003754.fna	0.101337	1	0.0963718	12	12	12	1298135	1298135	1298135	Human-Gut	1	0.0963718	12	12	12	0	0	NA	2
./Human-Oral/ftp.ebi.ac.uk/pub/databases/metagenomics/mgnify_genomes/human-oral/v1.0/species_catalogue/MGYG0002984/MGYG000298443/genome/MGYG000298443.fna	0.101432	1	0.0964577	6	6	6	351503	351503	351503	Human-Oral	3	0.000161222	130.333	270	54	0	0	NA	4
./Mouse-Gut/ftp.ebi.ac.uk/pub/databases/metagenomics/mgnify_genomes/mouse-gut/v1.0/species_catalogue/MGYG0003312/MGYG000331265/genome/MGYG000331265.fna	0.101754	1	0.0967482	38	38	38	1400398	1400398	1400398	Mouse-Gut	2	0.0048388	43.5	81	6	0	0	NA	3
./Human-Gut/pub/databases/metagenomics/mgnify_genomes/human-gut/v2.0/species_catalogue/MGYG0000008/MGYG000000814/genome/MGYG000000814.fna	0.101858	1	0.0968425	3	3	3	27453	27453	27453	Human-Gut	0	1	0	0	NA	0	0	NA	1
./Human-Gut/pub/databases/metagenomics/mgnify_genomes/human-gut/v2.0/species_catalogue/MGYG0000019/MGYG000001984/genome/MGYG000001984.fna	0.102054	1	0.0970194	1874	1874	1874	135574	135574	135574	Human-Gut	0	1	0	0	NA	0	0	NA	1
./Pig-Gut/ftp.ebi.ac.uk/pub/databases/metagenomics/mgnify_genomes/pig-gut/v1.0/species_catalogue/MGYG0003019/MGYG000301908/genome/MGYG000301908.fna	0.102134	1	0.0970913	1816	1816	1816	542387	542387	542387	Pig-Gut	3	0.000164504	201.667	227	155	0	0	NA	4
./Human-Gut/pub/databases/metagenomics/mgnify_genomes/human-gut/v2.0/species_catalogue/MGYG0000022/MGYG000002246/genome/MGYG000002246.fna	0.102374	1	0.0973085	4463	4463	4463	795690	795690	795690	Human-Gut	0	1	0	0	NA	0	0	NA	1
./Human-Oral/ftp.ebi.ac.uk/pub/databases/metagenomics/mgnify_genomes/human-oral/v1.0/species_catalogue/MGYG0002987/MGYG000298750/genome/MGYG000298750.fna	0.102383	1	0.0973162	40	40	40	83168	83168	83168	Human-Oral	0	1	0	0	NA	0	0	NA	1
./Mouse-Gut/ftp.ebi.ac.uk/pub/databases/metagenomics/mgnify_genomes/mouse-gut/v1.0/species_catalogue/MGYG0003313/MGYG000331340/genome/MGYG000331340.fna	0.102406	1	0.0973373	1145	1145	1145	127979	127979	127979	Mouse-Gut	1	0.0973373	9	9	9	0	0	NA	2
./Human-Gut/pub/databases/metagenomics/mgnify_genomes/human-gut/v2.0/species_catalogue/MGYG0000046/MGYG000004690/genome/MGYG000004690.fna	0.102538	1	0.0974564	53	53	53	1673355	1673355	1673355	Human-Gut	1	0.0974564	552	552	552	0	0	NA	2
./Human-Gut/pub/databases/metagenomics/mgnify_genomes/human-gut/v2.0/species_catalogue/MGYG0000020/MGYG000002030/genome/MGYG000002030.fna	0.102629	1	0.0975383	42964	42964	42964	1309350	1309350	1309350	Human-Gut	1	0.0975383	2	2	2	0	0	NA	2
./Marine/ftp.ebi.ac.uk/pub/databases/metagenomics/mgnify_genomes/marine/v1.0/species_catalogue/MGYG0002970/MGYG000297083/genome/MGYG000297083.fna	0.102643	1	0.0975513	5	5	5	441254	441254	441254	Marine	0	1	0	0	NA	0	0	NA	1
./Cow-Rumen/ftp.ebi.ac.uk/pub/databases/metagenomics/mgnify_genomes/cow-rumen/v1.0/species_catalogue/MGYG0002928/MGYG000292897/genome/MGYG000292897.fna	0.102672	1	0.0975772	4704	4704	4704	379287	379287	379287	Cow-Rumen	2	0.00492353	145	208	82	0	0	NA	3
./Cow-Rumen/ftp.ebi.ac.uk/pub/databases/metagenomics/mgnify_genomes/cow-rumen/v1.0/species_catalogue/MGYG0002911/MGYG000291133/genome/MGYG000291133.fna	0.103077	1	0.0979426	2962	2962	2962	266424	266424	266424	Cow-Rumen	1	0.0979426	89	89	89	0	0	NA	2
./Cow-Rumen/ftp.ebi.ac.uk/pub/databases/metagenomics/mgnify_genomes/cow-rumen/v1.0/species_catalogue/MGYG0002950/MGYG000295078/genome/MGYG000295078.fna	0.103349	1	0.098188	17947	17947	17947	605460	605460	605460	Cow-Rumen	0	1	0	0	NA	0	0	NA	1
./Mouse-Gut/ftp.ebi.ac.uk/pub/databases/metagenomics/mgnify_genomes/mouse-gut/v1.0/species_catalogue/MGYG0003307/MGYG000330717/genome/MGYG000330717.fna	0.103494	1	0.0983187	1	1	1	665541	665541	665541	Mouse-Gut	4	4.40106e-06	52	79	12	0	0	NA	5
./Marine/ftp.ebi.ac.uk/pub/databases/metagenomics/mgnify_genomes/marine/v1.0/species_catalogue/MGYG0002961/MGYG000296155/genome/MGYG000296155.fna	0.103506	1	0.098329	32769	32769	32769	1339204	1339204	1339204	Marine	0	1	0	0	NA	0	0	NA	1
./Human-Oral/ftp.ebi.ac.uk/pub/databases/metagenomics/mgnify_genomes/human-oral/v1.0/species_catalogue/MGYG0002986/MGYG000298646/genome/MGYG000298646.fna	0.103605	1	0.0984182	32	32	32	1380774	1380774	1380774	Human-Oral	0	1	0	0	NA	0	0	NA	1
./Pig-Gut/ftp.ebi.ac.uk/pub/databases/metagenomics/mgnify_genomes/pig-gut/v1.0/species_catalogue/MGYG0003017/MGYG000301713/genome/MGYG000301713.fna	0.103625	1	0.0984363	20	20	20	1341447	1341447	1341447	Pig-Gut	1	0.0984363	121	121	121	0	0	NA	2
./Human-Gut/pub/databases/metagenomics/mgnify_genomes/human-gut/v2.0/species_catalogue/MGYG0000020/MGYG000002073/genome/MGYG000002073.fna	0.103845	1	0.0986354	4	4	4	274004	274004	274004	Human-Gut	0	1	0	0	NA	0	0	NA	1
./Human-Gut/pub/databases/metagenomics/mgnify_genomes/human-gut/v2.0/species_catalogue/MGYG0000045/MGYG000004592/genome/MGYG000004592.fna	0.103912	1	0.0986958	43413	43413	43413	964821	964821	964821	Human-Gut	0	1	0	0	NA	0	0	NA	1
./Human-Gut/pub/databases/metagenomics/mgnify_genomes/human-gut/v2.0/species_catalogue/MGYG0000009/MGYG000000935/genome/MGYG000000935.fna	0.103948	1	0.0987283	35	35	35	909183	909183	909183	Human-Gut	3	0.000173194	60.3333	85	33	0	0	NA	4
./Human-Gut/pub/databases/metagenomics/mgnify_genomes/human-gut/v2.0/species_catalogue/MGYG0000046/MGYG000004631/genome/MGYG000004631.fna	0.103957	1	0.0987358	2835	2835	2835	555133	555133	555133	Human-Gut	2	0.00504323	106.5	111	102	0	0	NA	3
./Chicken-Gut/ftp.ebi.ac.uk/pub/databases/metagenomics/mgnify_genomes/chicken-gut/v1.0/species_catalogue/MGYG0003080/MGYG000308050/genome/MGYG000308050.fna	0.104128	1	0.0988904	853	853	853	1280804	1280804	1280804	Chicken-Gut	0	1	0	0	NA	0	0	NA	1
./Pig-Gut/ftp.ebi.ac.uk/pub/databases/metagenomics/mgnify_genomes/pig-gut/v1.0/species_catalogue/MGYG0003008/MGYG000300825/genome/MGYG000300825.fna	0.104218	1	0.098971	1338	1338	1338	472354	472354	472354	Pig-Gut	1	0.098971	135	135	135	0	0	NA	2
./Marine/ftp.ebi.ac.uk/pub/databases/metagenomics/mgnify_genomes/marine/v1.0/species_catalogue/MGYG0002960/MGYG000296088/genome/MGYG000296088.fna	0.104245	1	0.0989954	4069	4069	4069	327626	327626	327626	Marine	0	1	0	0	NA	0	0	NA	1
./Pig-Gut/ftp.ebi.ac.uk/pub/databases/metagenomics/mgnify_genomes/pig-gut/v1.0/species_catalogue/MGYG0003024/MGYG000302406/genome/MGYG000302406.fna	0.104328	1	0.0990705	15	15	15	258153	258153	258153	Pig-Gut	0	1	0	0	NA	0	0	NA	1
./Pig-Gut/ftp.ebi.ac.uk/pub/databases/metagenomics/mgnify_genomes/pig-gut/v1.0/species_catalogue/MGYG0003015/MGYG000301540/genome/MGYG000301540.fna	0.104454	1	0.0991837	6	6	6	852458	852458	852458	Pig-Gut	0	1	0	0	NA	0	0	NA	1
./Pig-Gut/ftp.ebi.ac.uk/pub/databases/metagenomics/mgnify_genomes/pig-gut/v1.0/species_catalogue/MGYG0003019/MGYG000301970/genome/MGYG000301970.fna	0.104459	1	0.0991885	30	30	30	438524	438524	438524	Pig-Gut	1	0.0991885	122	122	122	0	0	NA	2
./Cow-Rumen/ftp.ebi.ac.uk/pub/databases/metagenomics/mgnify_genomes/cow-rumen/v1.0/species_catalogue/MGYG0002926/MGYG000292659/genome/MGYG000292659.fna	0.104558	1	0.0992779	3090	3090	3090	1146131	1146131	1146131	Cow-Rumen	1	0.0992779	17	17	17	0	0	NA	2
./Human-Gut/pub/databases/metagenomics/mgnify_genomes/human-gut/v2.0/species_catalogue/MGYG0000026/MGYG000002669/genome/MGYG000002669.fna	0.104819	1	0.0995125	12091	12091	12091	1527314	1527314	1527314	Human-Gut	0	1	0	0	NA	0	0	NA	1
./Cow-Rumen/ftp.ebi.ac.uk/pub/databases/metagenomics/mgnify_genomes/cow-rumen/v1.0/species_catalogue/MGYG0002900/MGYG000290019/genome/MGYG000290019.fna	0.104866	1	0.0995544	3302	3302	3302	155247	155247	155247	Cow-Rumen	0	1	0	0	NA	0	0	NA	1
./Human-Gut/pub/databases/metagenomics/mgnify_genomes/human-gut/v2.0/species_catalogue/MGYG0000042/MGYG000004257/genome/MGYG000004257.fna	0.104871	1	0.0995595	2	2	2	79965	79965	79965	Human-Gut	0	1	0	0	NA	0	0	NA	1
./Pig-Gut/ftp.ebi.ac.uk/pub/databases/metagenomics/mgnify_genomes/pig-gut/v1.0/species_catalogue/MGYG0003017/MGYG000301769/genome/MGYG000301769.fna	0.105091	1	0.0997575	81021	81021	81021	1034902	1034902	1034902	Pig-Gut	0	1	0	0	NA	0	0	NA	1
./Human-Gut/pub/databases/metagenomics/mgnify_genomes/human-gut/v2.0/species_catalogue/MGYG0000003/MGYG000000367/genome/MGYG000000367.fna	0.1051	1	0.0997656	3628	3628	3628	246716	246716	246716	Human-Gut	0	1	0	0	NA	0	0	NA	1
./Human-Gut/pub/databases/metagenomics/mgnify_genomes/human-gut/v2.0/species_catalogue/MGYG0000041/MGYG000004158/genome/MGYG000004158.fna	0.105105	1	0.0997704	51731	51731	51731	570164	570164	570164	Human-Gut	0	1	0	0	NA	0	0	NA	1
./Human-Gut/pub/databases/metagenomics/mgnify_genomes/human-gut/v2.0/species_catalogue/MGYG0000006/MGYG000000603/genome/MGYG000000603.fna	0.105118	1	0.0997821	24031	24031	24031	159002	159002	159002	Human-Gut	0	1	0	0	NA	0	0	NA	1
./Human-Gut/pub/databases/metagenomics/mgnify_genomes/human-gut/v2.0/species_catalogue/MGYG0000017/MGYG000001762/genome/MGYG000001762.fna	0.105129	1	0.0997917	11	11	11	313348	313348	313348	Human-Gut	4	4.67971e-06	11.75	29	3	0	0	NA	5
./Human-Gut/pub/databases/metagenomics/mgnify_genomes/human-gut/v2.0/species_catalogue/MGYG0000025/MGYG000002582/genome/MGYG000002582.fna	0.105157	1	0.0998165	15908	15908	15908	905618	905618	905618	Human-Gut	0	1	0	0	NA	0	0	NA	1
./Human-Gut/pub/databases/metagenomics/mgnify_genomes/human-gut/v2.0/species_catalogue/MGYG0000039/MGYG000003969/genome/MGYG000003969.fna	0.105311	1	0.0999556	5574	5574	5574	765688	765688	765688	Human-Gut	0	1	0	0	NA	0	0	NA	1
./Human-Gut/pub/databases/metagenomics/mgnify_genomes/human-gut/v2.0/species_catalogue/MGYG0000005/MGYG000000571/genome/MGYG000000571.fna	0.105356	1	0.0999963	6986	6986	6986	308640	308640	308640	Human-Gut	0	1	0	0	NA	0	0	NA	1
./Cow-Rumen/ftp.ebi.ac.uk/pub/databases/metagenomics/mgnify_genomes/cow-rumen/v1.0/species_catalogue/MGYG0002953/MGYG000295332/genome/MGYG000295332.fna	0.105601	1	0.100216	3312	3312	3312	1040407	1040407	1040407	Cow-Rumen	0	1	0	0	NA	0	0	NA	1
./Human-Gut/pub/databases/metagenomics/mgnify_genomes/human-gut/v2.0/species_catalogue/MGYG0000033/MGYG000003330/genome/MGYG000003330.fna	0.105878	1	0.100466	32	32	32	32	32	32	Human-Gut	3	0.000182756	9	12	6	0	0	NA	4
./Cow-Rumen/ftp.ebi.ac.uk/pub/databases/metagenomics/mgnify_genomes/cow-rumen/v1.0/species_catalogue/MGYG0002935/MGYG000293504/genome/MGYG000293504.fna	0.106007	1	0.100582	6728	6728	6728	1015760	1015760	1015760	Cow-Rumen	0	1	0	0	NA	0	0	NA	1
./Human-Gut/pub/databases/metagenomics/mgnify_genomes/human-gut/v2.0/species_catalogue/MGYG0000046/MGYG000004624/genome/MGYG000004624.fna	0.106173	1	0.100731	886	886	886	1774171	1774171	1774171	Human-Gut	0	1	0	0	NA	0	0	NA	1
./Human-Gut/pub/databases/metagenomics/mgnify_genomes/human-gut/v2.0/species_catalogue/MGYG0000025/MGYG000002595/genome/MGYG000002595.fna	0.106245	1	0.100796	2	2	2	300145	300145	300145	Human-Gut	0	1	0	0	NA	0	0	NA	1
./Cow-Rumen/ftp.ebi.ac.uk/pub/databases/metagenomics/mgnify_genomes/cow-rumen/v1.0/species_catalogue/MGYG0002946/MGYG000294632/genome/MGYG000294632.fna	0.106254	1	0.100804	22849	22849	22849	219773	219773	219773	Cow-Rumen	1	0.100804	28	28	28	10	10	10	2
./Human-Gut/pub/databases/metagenomics/mgnify_genomes/human-gut/v2.0/species_catalogue/MGYG0000047/MGYG000004750/genome/MGYG000004750.fna	0.106768	1	0.101266	3981	3981	3981	816172	816172	816172	Human-Gut	0	1	0	0	NA	0	0	NA	1
./Cow-Rumen/ftp.ebi.ac.uk/pub/databases/metagenomics/mgnify_genomes/cow-rumen/v1.0/species_catalogue/MGYG0002910/MGYG000291007/genome/MGYG000291007.fna	0.106892	1	0.101377	182	182	182	1475798	1475798	1475798	Cow-Rumen	0	1	0	0	NA	0	0	NA	1
./Human-Gut/pub/databases/metagenomics/mgnify_genomes/human-gut/v2.0/species_catalogue/MGYG0000008/MGYG000000880/genome/MGYG000000880.fna	0.107071	1	0.101538	2	2	2	302990	302990	302990	Human-Gut	0	1	0	0	NA	0	0	NA	1
./Pig-Gut/ftp.ebi.ac.uk/pub/databases/metagenomics/mgnify_genomes/pig-gut/v1.0/species_catalogue/MGYG0003011/MGYG000301167/genome/MGYG000301167.fna	0.107099	1	0.101563	10755	10755	10755	602486	602486	602486	Pig-Gut	1	0.101563	40	40	40	0	0	NA	2
./Cow-Rumen/ftp.ebi.ac.uk/pub/databases/metagenomics/mgnify_genomes/cow-rumen/v1.0/species_catalogue/MGYG0002942/MGYG000294293/genome/MGYG000294293.fna	0.107552	1	0.10197	597	597	597	1091522	1091522	1091522	Cow-Rumen	0	1	0	0	NA	0	0	NA	1
./Chicken-Gut/ftp.ebi.ac.uk/pub/databases/metagenomics/mgnify_genomes/chicken-gut/v1.0/species_catalogue/MGYG0003078/MGYG000307819/genome/MGYG000307819.fna	0.107558	1	0.101975	419	419	419	1291042	1291042	1291042	Chicken-Gut	0	1	0	0	NA	0	0	NA	1
./Human-Vaginal/ftp.ebi.ac.uk/pub/databases/metagenomics/mgnify_genomes/human-vaginal/v1.0/species_catalogue/MGYG0003040/MGYG000304000/genome/MGYG000304000.fna	0.107567	1	0.101983	37	37	37	88711	88711	88711	Human-Vaginal	0	1	0	0	NA	0	0	NA	1
./Human-Gut/pub/databases/metagenomics/mgnify_genomes/human-gut/v2.0/species_catalogue/MGYG0000019/MGYG000001957/genome/MGYG000001957.fna	0.107665	1	0.102072	3542	3542	3542	1632189	1632189	1632189	Human-Gut	0	1	0	0	NA	0	0	NA	1
./Pig-Gut/ftp.ebi.ac.uk/pub/databases/metagenomics/mgnify_genomes/pig-gut/v1.0/species_catalogue/MGYG0003026/MGYG000302622/genome/MGYG000302622.fna	0.107743	1	0.102142	13	13	13	860518	860518	860518	Pig-Gut	1	0.102142	14	14	14	0	0	NA	2
./Human-Gut/pub/databases/metagenomics/mgnify_genomes/human-gut/v2.0/species_catalogue/MGYG0000035/MGYG000003508/genome/MGYG000003508.fna	0.107754	1	0.102152	62046	62046	62046	492970	492970	492970	Human-Gut	0	1	0	0	NA	0	0	NA	1
./Pig-Gut/ftp.ebi.ac.uk/pub/databases/metagenomics/mgnify_genomes/pig-gut/v1.0/species_catalogue/MGYG0003020/MGYG000302087/genome/MGYG000302087.fna	0.107763	1	0.10216	4296	4296	4296	454203	454203	454203	Pig-Gut	1	0.10216	2	2	2	0	0	NA	2
./Human-Gut/pub/databases/metagenomics/mgnify_genomes/human-gut/v2.0/species_catalogue/MGYG0000016/MGYG000001625/genome/MGYG000001625.fna	0.107838	1	0.102227	815	815	815	25599	25599	25599	Human-Gut	0	1	0	0	NA	0	0	NA	1
./Human-Gut/pub/databases/metagenomics/mgnify_genomes/human-gut/v2.0/species_catalogue/MGYG0000035/MGYG000003584/genome/MGYG000003584.fna	0.107881	1	0.102266	21	21	21	809893	809893	809893	Human-Gut	2	0.00541712	12.5	14	11	0	0	NA	3
./Human-Oral/ftp.ebi.ac.uk/pub/databases/metagenomics/mgnify_genomes/human-oral/v1.0/species_catalogue/MGYG0002992/MGYG000299202/genome/MGYG000299202.fna	0.108097	1	0.10246	34	34	34	45102	45102	45102	Human-Oral	1	0.10246	54	54	54	0	0	NA	2
./Human-Gut/pub/databases/metagenomics/mgnify_genomes/human-gut/v2.0/species_catalogue/MGYG0000033/MGYG000003397.1/genome/MGYG000003397.1.fna	0.108142	1	0.1025	2623	2623	2623	527682	527682	527682	Human-Gut	0	1	0	0	NA	0	0	NA	1
./Human-Gut/pub/databases/metagenomics/mgnify_genomes/human-gut/v2.0/species_catalogue/MGYG0000019/MGYG000001914/genome/MGYG000001914.fna	0.108378	1	0.102711	271	271	271	303050	303050	303050	Human-Gut	0	1	0	0	NA	0	0	NA	1
./Mouse-Gut/ftp.ebi.ac.uk/pub/databases/metagenomics/mgnify_genomes/mouse-gut/v1.0/species_catalogue/MGYG0003308/MGYG000330847/genome/MGYG000330847.fna	0.108533	1	0.102851	513	513	513	1560760	1560760	1560760	Mouse-Gut	0	1	0	0	NA	0	0	NA	1
./Cow-Rumen/ftp.ebi.ac.uk/pub/databases/metagenomics/mgnify_genomes/cow-rumen/v1.0/species_catalogue/MGYG0002936/MGYG000293658/genome/MGYG000293658.fna	0.108552	1	0.102868	824	824	824	317823	317823	317823	Cow-Rumen	0	1	0	0	NA	0	0	NA	1
./Chicken-Gut/ftp.ebi.ac.uk/pub/databases/metagenomics/mgnify_genomes/chicken-gut/v1.0/species_catalogue/MGYG0003157/MGYG000315731/genome/MGYG000315731.fna	0.108562	1	0.102877	21548	21548	21548	975482	975482	975482	Chicken-Gut	0	1	0	0	NA	0	0	NA	1
./Pig-Gut/ftp.ebi.ac.uk/pub/databases/metagenomics/mgnify_genomes/pig-gut/v1.0/species_catalogue/MGYG0003035/MGYG000303586/genome/MGYG000303586.fna	0.108704	1	0.103004	763	763	763	249142	249142	249142	Pig-Gut	0	1	0	0	NA	0	0	NA	1
./Human-Gut/pub/databases/metagenomics/mgnify_genomes/human-gut/v2.0/species_catalogue/MGYG0000020/MGYG000002091/genome/MGYG000002091.fna	0.108749	1	0.103045	11	11	11	117049	117049	117049	Human-Gut	1	0.103045	33	33	33	0	0	NA	2
./Human-Gut/pub/databases/metagenomics/mgnify_genomes/human-gut/v2.0/species_catalogue/MGYG0000012/MGYG000001236/genome/MGYG000001236.fna	0.10879	1	0.103082	5836	5836	5836	287912	287912	287912	Human-Gut	1	0.103082	2	2	2	0	0	NA	2
./Human-Gut/pub/databases/metagenomics/mgnify_genomes/human-gut/v2.0/species_catalogue/MGYG0000016/MGYG000001680/genome/MGYG000001680.fna	0.108819	1	0.103107	3	3	3	471633	471633	471633	Human-Gut	1	0.103107	25	25	25	0	0	NA	2
./Human-Gut/pub/databases/metagenomics/mgnify_genomes/human-gut/v2.0/species_catalogue/MGYG0000029/MGYG000002986/genome/MGYG000002986.fna	0.108873	1	0.103155	31	31	31	10949	10949	10949	Human-Gut	1	0.103155	33	33	33	0	0	NA	2
./Human-Gut/pub/databases/metagenomics/mgnify_genomes/human-gut/v2.0/species_catalogue/MGYG0000037/MGYG000003789/genome/MGYG000003789.fna	0.108899	1	0.103179	3	3	3	987917	987917	987917	Human-Gut	0	1	0	0	NA	0	0	NA	1
./Cow-Rumen/ftp.ebi.ac.uk/pub/databases/metagenomics/mgnify_genomes/cow-rumen/v1.0/species_catalogue/MGYG0002908/MGYG000290898/genome/MGYG000290898.fna	0.108922	1	0.1032	10698	10698	10698	1351447	1351447	1351447	Cow-Rumen	1	0.1032	140	140	140	0	0	NA	2
./Human-Gut/pub/databases/metagenomics/mgnify_genomes/human-gut/v2.0/species_catalogue/MGYG0000026/MGYG000002688/genome/MGYG000002688.fna	0.109008	1	0.103277	193	193	193	1217148	1217148	1217148	Human-Gut	2	0.00552673	94.5	132	57	0	0	NA	3
./Mouse-Gut/ftp.ebi.ac.uk/pub/databases/metagenomics/mgnify_genomes/mouse-gut/v1.0/species_catalogue/MGYG0003304/MGYG000330461/genome/MGYG000330461.fna	0.109146	1	0.103401	15989	15989	15989	153491	153491	153491	Mouse-Gut	0	1	0	0	NA	0	0	NA	1
./Human-Gut/pub/databases/metagenomics/mgnify_genomes/human-gut/v2.0/species_catalogue/MGYG0000007/MGYG000000759/genome/MGYG000000759.fna	0.109155	1	0.103408	951	951	951	104305	104305	104305	Human-Gut	0	1	0	0	NA	0	0	NA	1
./Human-Oral/ftp.ebi.ac.uk/pub/databases/metagenomics/mgnify_genomes/human-oral/v1.0/species_catalogue/MGYG0002980/MGYG000298088/genome/MGYG000298088.fna	0.109215	1	0.103463	43422	43422	43422	917137	917137	917137	Human-Oral	0	1	0	0	NA	0	0	NA	1
./Non-Model-Fish-Gut/ftp.ebi.ac.uk/pub/databases/metagenomics/mgnify_genomes/non-model-fish-gut/v2.0/species_catalogue/MGYG0002995/MGYG000299538/genome/MGYG000299538.fna	0.109224	1	0.103471	37	37	37	482299	482299	482299	Non-Model-Fish-Gut	1	0.103471	66	66	66	0	0	NA	2
./Human-Vaginal/ftp.ebi.ac.uk/pub/databases/metagenomics/mgnify_genomes/human-vaginal/v1.0/species_catalogue/MGYG0003041/MGYG000304144/genome/MGYG000304144.fna	0.109238	1	0.103483	295767	295767	295767	1582378	1582378	1582378	Human-Vaginal	0	1	0	0	NA	0	0	NA	1
./Human-Vaginal/ftp.ebi.ac.uk/pub/databases/metagenomics/mgnify_genomes/human-vaginal/v1.0/species_catalogue/MGYG0003042/MGYG000304227/genome/MGYG000304227.fna	0.109262	1	0.103505	15990	15990	15990	313103	313103	313103	Human-Vaginal	0	1	0	0	NA	0	0	NA	1
./Pig-Gut/ftp.ebi.ac.uk/pub/databases/metagenomics/mgnify_genomes/pig-gut/v1.0/species_catalogue/MGYG0003033/MGYG000303334/genome/MGYG000303334.fna	0.109402	1	0.10363	34	34	34	842973	842973	842973	Pig-Gut	3	0.00020109	90.6667	178	25	0	0	NA	4
./Human-Gut/pub/databases/metagenomics/mgnify_genomes/human-gut/v2.0/species_catalogue/MGYG0000018/MGYG000001815/genome/MGYG000001815.fna	0.109484	1	0.103703	20334	20334	20334	1300868	1300868	1300868	Human-Gut	0	1	0	0	NA	0	0	NA	1
./Human-Gut/pub/databases/metagenomics/mgnify_genomes/human-gut/v2.0/species_catalogue/MGYG0000048/MGYG000004826/genome/MGYG000004826.fna	0.109505	1	0.103722	1	1	1	736357	736357	736357	Human-Gut	0	1	0	0	NA	0	0	NA	1
./Human-Gut/pub/databases/metagenomics/mgnify_genomes/human-gut/v2.0/species_catalogue/MGYG0000030/MGYG000003002/genome/MGYG000003002.fna	0.109561	1	0.103772	3	3	3	392832	392832	392832	Human-Gut	0	1	0	0	NA	0	0	NA	1
./Marine/ftp.ebi.ac.uk/pub/databases/metagenomics/mgnify_genomes/marine/v1.0/species_catalogue/MGYG0002971/MGYG000297112/genome/MGYG000297112.fna	0.109597	1	0.103805	19	19	19	815035	815035	815035	Marine	1	0.103805	9	9	9	0	0	NA	2
./Pig-Gut/ftp.ebi.ac.uk/pub/databases/metagenomics/mgnify_genomes/pig-gut/v1.0/species_catalogue/MGYG0003018/MGYG000301802/genome/MGYG000301802.fna	0.109683	1	0.103882	57	57	57	117308	117308	117308	Pig-Gut	0	1	0	0	NA	0	0	NA	1
./Marine/ftp.ebi.ac.uk/pub/databases/metagenomics/mgnify_genomes/marine/v1.0/species_catalogue/MGYG0002962/MGYG000296237/genome/MGYG000296237.fna	0.109693	1	0.103891	5605	5605	5605	750089	750089	750089	Marine	0	1	0	0	NA	0	0	NA	1
./Chicken-Gut/ftp.ebi.ac.uk/pub/databases/metagenomics/mgnify_genomes/chicken-gut/v1.0/species_catalogue/MGYG0003080/MGYG000308041/genome/MGYG000308041.fna	0.1097	1	0.103897	1	1	1	420343	420343	420343	Chicken-Gut	0	1	0	0	NA	0	0	NA	1
./Mouse-Gut/ftp.ebi.ac.uk/pub/databases/metagenomics/mgnify_genomes/mouse-gut/v1.0/species_catalogue/MGYG0003313/MGYG000331390/genome/MGYG000331390.fna	0.109769	1	0.103959	6418	6418	6418	703680	703680	703680	Mouse-Gut	0	1	0	0	NA	0	0	NA	1
./Chicken-Gut/ftp.ebi.ac.uk/pub/databases/metagenomics/mgnify_genomes/chicken-gut/v1.0/species_catalogue/MGYG0003089/MGYG000308944/genome/MGYG000308944.fna	0.109861	1	0.104041	2803	2803	2803	576571	576571	576571	Chicken-Gut	1	0.104041	33	33	33	0	0	NA	2
./Zebrafish-Fecal/ftp.ebi.ac.uk/pub/databases/metagenomics/mgnify_genomes/zebrafish-fecal/v1.0/species_catalogue/MGYG0002993/MGYG000299364/genome/MGYG000299364.fna	0.109909	1	0.104084	1816	1816	1816	470023	470023	470023	Zebrafish-Gut	0	1	0	0	NA	0	0	NA	1
./Human-Gut/pub/databases/metagenomics/mgnify_genomes/human-gut/v2.0/species_catalogue/MGYG0000032/MGYG000003220/genome/MGYG000003220.fna	0.109972	1	0.104141	17	17	17	1756478	1756478	1756478	Human-Gut	3	0.000204161	51.6667	70	26	0	0	NA	4
./Human-Gut/pub/databases/metagenomics/mgnify_genomes/human-gut/v2.0/species_catalogue/MGYG0000010/MGYG000001014/genome/MGYG000001014.fna	0.110001	1	0.104167	29	29	29	229428	229428	229428	Human-Gut	0	1	0	0	NA	0	0	NA	1
./Human-Gut/pub/databases/metagenomics/mgnify_genomes/human-gut/v2.0/species_catalogue/MGYG0000018/MGYG000001841/genome/MGYG000001841.fna	0.110038	1	0.1042	2	2	2	281145	281145	281145	Human-Gut	0	1	0	0	NA	0	0	NA	1
./Human-Gut/pub/databases/metagenomics/mgnify_genomes/human-gut/v2.0/species_catalogue/MGYG0000033/MGYG000003370/genome/MGYG000003370.fna	0.110049	1	0.10421	5334	5334	5334	528857	528857	528857	Human-Gut	0	1	0	0	NA	0	0	NA	1
./Human-Gut/pub/databases/metagenomics/mgnify_genomes/human-gut/v2.0/species_catalogue/MGYG0000047/MGYG000004731/genome/MGYG000004731.fna	0.110074	1	0.104232	3827	3827	3827	1344710	1344710	1344710	Human-Gut	1	0.104232	260	260	260	0	0	NA	2
./Cow-Rumen/ftp.ebi.ac.uk/pub/databases/metagenomics/mgnify_genomes/cow-rumen/v1.0/species_catalogue/MGYG0002932/MGYG000293248/genome/MGYG000293248.fna	0.110075	1	0.104233	5947	5947	5947	1104603	1104603	1104603	Cow-Rumen	0	1	0	0	NA	0	0	NA	1
./Human-Gut/pub/databases/metagenomics/mgnify_genomes/human-gut/v2.0/species_catalogue/MGYG0000016/MGYG000001678/genome/MGYG000001678.fna	0.110212	1	0.104356	14	14	14	83446	83446	83446	Human-Gut	1	0.104356	12	12	12	0	0	NA	2
./Cow-Rumen/ftp.ebi.ac.uk/pub/databases/metagenomics/mgnify_genomes/cow-rumen/v1.0/species_catalogue/MGYG0002908/MGYG000290859/genome/MGYG000290859.fna	0.110307	1	0.104441	32761	32761	32761	203089	203089	203089	Cow-Rumen	0	1	0	0	NA	0	0	NA	1
./Cow-Rumen/ftp.ebi.ac.uk/pub/databases/metagenomics/mgnify_genomes/cow-rumen/v1.0/species_catalogue/MGYG0002926/MGYG000292617/genome/MGYG000292617.fna	0.110406	1	0.104529	13913	13913	13913	1146264	1146264	1146264	Cow-Rumen	0	1	0	0	NA	0	0	NA	1
./Cow-Rumen/ftp.ebi.ac.uk/pub/databases/metagenomics/mgnify_genomes/cow-rumen/v1.0/species_catalogue/MGYG0002918/MGYG000291830/genome/MGYG000291830.fna	0.11058	1	0.104685	4504	4504	4504	320870	320870	320870	Cow-Rumen	0	1	0	0	NA	0	0	NA	1
./Human-Gut/pub/databases/metagenomics/mgnify_genomes/human-gut/v2.0/species_catalogue/MGYG0000020/MGYG000002078/genome/MGYG000002078.fna	0.110659	1	0.104756	2	2	2	301369	301369	301369	Human-Gut	3	0.000207905	106.333	209	8	0	0	NA	4
./Marine/ftp.ebi.ac.uk/pub/databases/metagenomics/mgnify_genomes/marine/v1.0/species_catalogue/MGYG0002960/MGYG000296006/genome/MGYG000296006.fna	0.110663	1	0.104759	30	30	30	1201279	1201279	1201279	Marine	1	0.104759	170	170	170	0	0	NA	2
./Mouse-Gut/ftp.ebi.ac.uk/pub/databases/metagenomics/mgnify_genomes/mouse-gut/v1.0/species_catalogue/MGYG0003283/MGYG000328314/genome/MGYG000328314.fna	0.110712	1	0.104804	7	7	7	1086457	1086457	1086457	Mouse-Gut	0	1	0	0	NA	0	0	NA	1
./Human-Gut/pub/databases/metagenomics/mgnify_genomes/human-gut/v2.0/species_catalogue/MGYG0000045/MGYG000004598/genome/MGYG000004598.fna	0.111067	1	0.105122	4	4	4	25660	25660	25660	Human-Gut	0	1	0	0	NA	0	0	NA	1
./Human-Gut/pub/databases/metagenomics/mgnify_genomes/human-gut/v2.0/species_catalogue/MGYG0000014/MGYG000001411/genome/MGYG000001411.fna	0.111107	1	0.105157	592320	592320	592320	592320	592320	592320	Human-Gut	1	0.105157	5	5	5	0	0	NA	2
./Mouse-Gut/ftp.ebi.ac.uk/pub/databases/metagenomics/mgnify_genomes/mouse-gut/v1.0/species_catalogue/MGYG0003231/MGYG000323189/genome/MGYG000323189.fna	0.111182	1	0.105224	1176	1176	1176	847402	847402	847402	Mouse-Gut	0	1	0	0	NA	0	0	NA	1
./Cow-Rumen/ftp.ebi.ac.uk/pub/databases/metagenomics/mgnify_genomes/cow-rumen/v1.0/species_catalogue/MGYG0002921/MGYG000292190/genome/MGYG000292190.fna	0.111228	1	0.105265	10803	10803	10803	800962	800962	800962	Cow-Rumen	0	1	0	0	NA	0	0	NA	1
./Chicken-Gut/ftp.ebi.ac.uk/pub/databases/metagenomics/mgnify_genomes/chicken-gut/v1.0/species_catalogue/MGYG0003165/MGYG000316551/genome/MGYG000316551.fna	0.111286	1	0.105317	8631	8631	8631	56084	56084	56084	Chicken-Gut	0	1	0	0	NA	0	0	NA	1
./Cow-Rumen/ftp.ebi.ac.uk/pub/databases/metagenomics/mgnify_genomes/cow-rumen/v1.0/species_catalogue/MGYG0002941/MGYG000294124/genome/MGYG000294124.fna	0.111454	1	0.105468	40980	40980	40980	1172998	1172998	1172998	Cow-Rumen	1	0.105468	46	46	46	0	0	NA	2
./Cow-Rumen/ftp.ebi.ac.uk/pub/databases/metagenomics/mgnify_genomes/cow-rumen/v1.0/species_catalogue/MGYG0002941/MGYG000294128/genome/MGYG000294128.fna	0.111509	1	0.105517	2249	2249	2249	143283	143283	143283	Cow-Rumen	0	1	0	0	NA	0	0	NA	1
./Cow-Rumen/ftp.ebi.ac.uk/pub/databases/metagenomics/mgnify_genomes/cow-rumen/v1.0/species_catalogue/MGYG0002937/MGYG000293736/genome/MGYG000293736.fna	0.111539	1	0.105543	26585	26585	26585	814077	814077	814077	Cow-Rumen	1	0.105543	2	2	2	0	0	NA	2
./Human-Gut/pub/databases/metagenomics/mgnify_genomes/human-gut/v2.0/species_catalogue/MGYG0000021/MGYG000002183/genome/MGYG000002183.fna	0.111594	1	0.105593	4	4	4	68511	68511	68511	Human-Gut	0	1	0	0	NA	0	0	NA	1
./Marine/ftp.ebi.ac.uk/pub/databases/metagenomics/mgnify_genomes/marine/v1.0/species_catalogue/MGYG0002963/MGYG000296305/genome/MGYG000296305.fna	0.111663	1	0.105654	6	6	6	106612	106612	106612	Marine	1	0.105654	30	30	30	0	0	NA	2
./Human-Oral/ftp.ebi.ac.uk/pub/databases/metagenomics/mgnify_genomes/human-oral/v1.0/species_catalogue/MGYG0002981/MGYG000298106/genome/MGYG000298106.fna	0.111708	1	0.105695	1	1	1	630593	630593	630593	Human-Oral	0	1	0	0	NA	0	0	NA	1
./Human-Gut/pub/databases/metagenomics/mgnify_genomes/human-gut/v2.0/species_catalogue/MGYG0000008/MGYG000000875/genome/MGYG000000875.fna	0.111718	1	0.105704	4646	4646	4646	214891	214891	214891	Human-Gut	1	0.105704	43	43	43	0	0	NA	2
./Human-Gut/pub/databases/metagenomics/mgnify_genomes/human-gut/v2.0/species_catalogue/MGYG0000032/MGYG000003230/genome/MGYG000003230.fna	0.111786	1	0.105764	1	1	1	1380420	1380420	1380420	Human-Gut	0	1	0	0	NA	0	0	NA	1
[truncated: 13,992 more rows]
